# Supplementary material for: A Surprising Cross-Species Conservation in the Genomic Landscape of Mouse and Human Oral Cancer Identifies a Transcriptional Signature Predicting Metastatic Disease
Source: Oxford University Press journal article supplement (doi:10.1158/1078-0432.ccr-14-0205), 2014-03-26
Supplement: 10780432ccr140205-sup-tabs1-20.xls [file 10780432ccr140205-sup-tabs1-20.xls]

## Sheet: S1
Table S1-SNVs indolent lines
chromosome_name	start	stop	reference	variant	type	gene_name	transcript_name	transcript_species	transcript_source	transcript_version	strand	transcript_status	trv_type	c_position	amino_acid_change	ucsc_cons	domain	all_domains	deletion_substructures	transcript_error	Predicted_In	MOC1_ref_supporting_reads	MOC1_var_supporting_reads	MOC1_VAF	MOC22_ref_supporting_reads	MOC22_var_supporting_reads	MOC22_VAF	MOC23_ref_supporting_reads	MOC23_var_supporting_reads	MOC23_VAF	CXCR3KO_var_supporting_reads	CXCR3KO_var_supporting_reads	CXCR3KO_VAF
1	3522778	3522778	C	A	SNP	LOC664792	XR_030515.1	mouse	genbank	58_37k	1	model	rna	NULL	NULL	0	0	0	0	pseudogene	MOC22	51	0	0	39	16	29.09	74	0	0	83	0	0
1	4515819	4515819	G	T	SNP	LOC664830	XR_030593.1	mouse	genbank	58_37k	1	model	rna	NULL	NULL	0	0	0	0	pseudogene	MOC22	104	0	0	76	38	33.33	191	1	0.52	188	0	0
1	4683708	4683708	T	A	SNP	EG619980	XR_030641.1	mouse	genbank	58_37k	-1	model	rna	NULL	NULL	0	0	0	0	pseudogene	MOC22	21	0	0	3	13	81.25	22	0	0	17	0	0
1	6913638	6913638	T	A	SNP	LOC665027	XR_030835.1	mouse	genbank	58_37k	1	model	rna	NULL	NULL	0	0	0	0	pseudogene	MOC22	53	0	0	10	29	74.36	54	0	0	53	0	0
1	7153443	7153443	G	T	SNP	Pcmtd1	NM_183028.3	mouse	genbank	58_37k	1	validated	missense	c.697	p.V233L	0	NULL	HMMPfam_PCMT,superfamily_S-adenosyl-L-methionine-dependent methyltransferases	0	no_errors	MOC22	76	0	0	26	44	62.86	128	0	0	104	0	0
1	8578700	8578700	T	A	SNP	ENSMUSG00000076169	ENSMUST00000102214	mouse	ensembl	58_37k	-1	novel	rna	NULL	NULL	0	0	0	0	no_errors	MOC22	18	0	0	1	10	90.91	28	1	3.45	25	0	0
1	8597184	8597184	A	T	SNP	Sntg1	NM_027671.4	mouse	genbank	58_37k	-1	validated	missense	c.516	p.S172R	0	NULL	HMMPfam_PDZ,HMMSmart_PDZ,superfamily_PDZ,HMMSmart_PH,superfamily_SSF50729	0	no_errors	MOC1	17	91	84.26	87	0	0	147	0	0	134	0	0
1	8614864	8614864	A	C	SNP	Sntg1	NM_027671.4	mouse	genbank	58_37k	-1	validated	missense	c.462	p.C154W	0	superfamily_PDZ	HMMPfam_PDZ,HMMSmart_PDZ,superfamily_PDZ,HMMSmart_PH,superfamily_SSF50729	0	no_errors	MOC1	49	18	26.87	68	0	0	126	0	0	93	0	0
1	8614889	8614889	A	T	SNP	Sntg1	NM_027671.4	mouse	genbank	58_37k	-1	validated	missense	c.437	p.L146H	0	superfamily_PDZ	HMMPfam_PDZ,HMMSmart_PDZ,superfamily_PDZ,HMMSmart_PH,superfamily_SSF50729	0	no_errors	MOC23	79	0	0	87	0	0	66	68	50.75	108	0	0
1	8953531	8953531	T	A	SNP	LOC665103	XR_030934.1	mouse	genbank	58_37k	-1	model	rna	NULL	NULL	0	0	0	0	pseudogene	MOC1	65	15	18.75	82	0	0	131	0	0	104	0	0
1	9673222	9673222	C	A	SNP	Mybl1	NM_008651.2	mouse	genbank	58_37k	-1	validated	missense	c.715	p.D239Y	0	HMMPfam_Wos2	HMMSmart_SM00717,superfamily_Homeodomain-like,HMMPfam_Wos2,HMMPfam_Myb_DNA-binding,HMMPfam_Cmyb_C	0	no_errors	MOC23	147	0	0	101	0	0	83	100	54.64	161	0	0
1	9772338	9772338	T	A	SNP	LOC665173	XR_031004.1	mouse	genbank	58_37k	-1	model	rna	NULL	NULL	0	0	0	0	pseudogene	MOC23	29	0	0	39	0	0	24	25	51.02	33	0	0
1	9772355	9772355	C	G	SNP	LOC665173	XR_031004.1	mouse	genbank	58_37k	-1	model	rna	NULL	NULL	0	0	0	0	pseudogene	MOC23	23	0	0	34	0	0	21	24	53.33	28	0	0
1	9934149	9934149	T	A	SNP	ENSMUSG00000085231	ENSMUST00000142965	mouse	ensembl	58_37k	-1	known	rna	NULL	NULL	0	0	0	0	no_errors	MOC22	22	0	0	7	9	56.25	26	0	0	33	0	0
1	9968912	9968912	T	A	SNP	Lrrc67	NM_145692.1	mouse	genbank	58_37k	-1	provisional	missense	c.787	p.S263C	0	NULL	HMMPfam_LRR_1,HMMSmart_SM00365,superfamily_Outer arm dynein light chain 1	0	no_errors	MOC22	67	0	0	27	18	40	75	1	1.32	77	0	0
1	10132661	10132661	T	A	SNP	Arfgef1	ENSMUST00000088615	mouse	ensembl	58_37k	-1	known	missense	c.5115	p.K1705N	0	NULL	HMMPfam_Sec7,HMMSmart_SM00222,superfamily_Sec7 domain,HMMPfam_DUF1981,superfamily_ARM repeat	0	no_errors	MOC23	16	0	0	24	0	0	11	13	54.17	16	1	5.88
1	10795558	10795558	G	T	SNP	LOC433271	XR_031107.1	mouse	genbank	58_37k	1	model	rna	NULL	NULL	0	0	0	0	pseudogene	MOC23	6	0	0	2	0	0	6	4	40	5	0	0
1	11102864	11102864	A	C	SNP	Prex2	ENSMUST00000027056	mouse	ensembl	58_37k	1	known	silent	c.1255	p.R419	0	HMMPfam_DEP,HMMSmart_SM00049,superfamily_Winged helix DNA-binding domain	HMMPfam_RhoGEF,HMMSmart_SM00325,superfamily_DBL homology domain (DH-domain),HMMPfam_DEP,HMMSmart_SM00049,PatternScan_DH_1,HMMSmart_SM00228,superfamily_PDZ domain-like,HMMPfam_PH,HMMSmart_SM00233,superfamily_Winged helix DNA-binding domain,superfamily_PH domain-like	0	no_errors	MOC23	154	0	0	124	1	0.79	131	84	39.07	197	0	0
1	11160097	11160097	T	A	SNP	Prex2	ENSMUST00000027056	mouse	ensembl	58_37k	1	known	missense	c.2855	p.V952E	0	NULL	HMMPfam_RhoGEF,HMMSmart_SM00325,superfamily_DBL homology domain (DH-domain),HMMPfam_DEP,HMMSmart_SM00049,PatternScan_DH_1,HMMSmart_SM00228,superfamily_PDZ domain-like,HMMPfam_PH,HMMSmart_SM00233,superfamily_Winged helix DNA-binding domain,superfamily_PH domain-like	0	no_errors	MOC23	40	0	0	39	0	0	45	26	36.62	52	0	0
1	11190023	11190023	A	T	SNP	Prex2	ENSMUST00000027056	mouse	ensembl	58_37k	1	known	missense	c.3850	p.N1284Y	0	NULL	HMMPfam_RhoGEF,HMMSmart_SM00325,superfamily_DBL homology domain (DH-domain),HMMPfam_DEP,HMMSmart_SM00049,PatternScan_DH_1,HMMSmart_SM00228,superfamily_PDZ domain-like,HMMPfam_PH,HMMSmart_SM00233,superfamily_Winged helix DNA-binding domain,superfamily_PH domain-like	0	no_errors	MOC22	19	0	0	2	12	85.71	26	0	0	15	0	0
1	11221836	11221836	A	T	SNP	Prex2	ENSMUST00000027056	mouse	ensembl	58_37k	1	known	silent	c.4281	p.T1427	0	NULL	HMMPfam_RhoGEF,HMMSmart_SM00325,superfamily_DBL homology domain (DH-domain),HMMPfam_DEP,HMMSmart_SM00049,PatternScan_DH_1,HMMSmart_SM00228,superfamily_PDZ domain-like,HMMPfam_PH,HMMSmart_SM00233,superfamily_Winged helix DNA-binding domain,superfamily_PH domain-like	0	no_errors	MOC22	127	0	0	44	65	59.63	237	2	0.84	144	0	0
1	11404658	11404658	T	A	SNP	A830018L16Rik	NM_177173.5	mouse	genbank	58_37k	1	validated	silent	c.9	p.S3	0	NULL	NULL	0	no_errors	MOC23	88	0	0	85	0	0	88	59	40.14	114	2	1.72
1	12832836	12832836	T	A	SNP	Sulf1	NM_172294.1	mouse	genbank	58_37k	1	provisional	missense	c.2212	p.C738S	0	superfamily_Alkaline_phosphatase_core	HMMPfam_Sulfatase,PatternScan_SULFATASE_2,PatternScan_SULFATASE_1,superfamily_Alkaline_phosphatase_core	0	no_errors	MOC1	34	10	22.73	38	1	2.38	76	0	0	68	0	0
1	12871479	12871479	A	C	SNP	Slco5a1	NM_172841.2	mouse	genbank	58_37k	-1	validated	missense	c.1680	p.C560W	0	HMMPfam_OATP,HMMPfam_Kazal_2,superfamily_MFS general substrate transporter,superfamily_Kazal-type serine protease inhibitors	HMMPfam_OATP,HMMPfam_Kazal_2,superfamily_MFS general substrate transporter,superfamily_Kazal-type serine protease inhibitors	0	no_errors	MOC22	22	0	0	10	22	68.75	34	0	0	27	0	0
1	12884595	12884595	C	A	SNP	Slco5a1	NM_172841.2	mouse	genbank	58_37k	-1	validated	missense	c.1538	p.G513V	0	HMMPfam_OATP,superfamily_MFS general substrate transporter	HMMPfam_OATP,HMMPfam_Kazal_2,superfamily_MFS general substrate transporter,superfamily_Kazal-type serine protease inhibitors	0	no_errors	MOC23	38	0	0	41	0	0	11	61	84.72	74	0	0
1	13115858	13115858	T	A	SNP	Prdm14	NM_001081209.2	mouse	genbank	58_37k	-1	validated	missense	c.59	p.Q20L	0	NULL	HMMPfam_SET,HMMSmart_SM00317,HMMPfam_zf-C2H2,PatternScan_ZINC_FINGER_C2H2_1,HMMSmart_SM00355,superfamily_C2H2 and C2HC zinc fingers,superfamily_SET domain	0	no_errors	MOC22	96	0	0	70	24	25.53	179	0	0	152	0	0
1	13690996	13690996	G	T	SNP	Xkr9	NM_001011873.2	mouse	genbank	58_37k	1	provisional	silent	c.654	p.L218	0	HMMPfam_XK-related	HMMPfam_XK-related	0	no_errors	MOC23	191	0	0	214	1	0.47	74	209	73.59	250	0	0
1	14855300	14855300	A	G	SNP	EG665407	XM_976689.2	mouse	genbank	58_37k	1	model	missense	c.148	p.R50G	0	HMMPfam_Ribosomal_L18p,superfamily_Translational machinery components	HMMPfam_Ribosomal_L18p,superfamily_Translational machinery components	0	pseudogene	MOC1	22	39	63.93	41	0	0	70	0	0	92	0	0
1	15009140	15009140	T	A	SNP	ENSMUSG00000088159	ENSMUST00000157534	mouse	ensembl	58_37k	-1	novel	rna	NULL	NULL	0	0	0	0	no_errors	MOC23	7	0	0	4	0	0	2	5	71.43	8	0	0
1	15700781	15700781	A	T	SNP	Kcnb2	XM_001473804.1	mouse	genbank	58_37k	1	model	missense	c.1795	p.S599C	0	HMMPfam_Kv2channel	HMMSmart_SM00225,HMMPfam_K_tetra,HMMPfam_Kv2channel,HMMPfam_Ion_trans,superfamily_POZ domain,superfamily_Voltage-gated potassium channels	0	no_errors	MOC22	75	0	0	22	64	73.56	130	0	0	102	0	0
1	15700817	15700817	A	T	SNP	Kcnb2	XM_001473804.1	mouse	genbank	58_37k	1	model	missense	c.1831	p.T611S	0	HMMPfam_Kv2channel	HMMSmart_SM00225,HMMPfam_K_tetra,HMMPfam_Kv2channel,HMMPfam_Ion_trans,superfamily_POZ domain,superfamily_Voltage-gated potassium channels	0	no_errors	MOC23	97	0	0	89	0	0	49	105	68.18	131	0	0
1	16690903	16690903	A	G	SNP	Ly96	NM_016923.2	mouse	genbank	58_37k	1	validated	missense	c.230	p.N77S	0	HMMPfam_E1_DerP2_DerF2,HMMSmart_SM00737	HMMPfam_E1_DerP2_DerF2,HMMSmart_SM00737	0	no_errors	MOC23	50	1	1.96	41	0	0	50	14	21.88	43	0	0
1	16758564	16758564	A	G	SNP	EG545306	XM_619609.4	mouse	genbank	58_37k	-1	model	silent	c.1746	p.S582	0	NULL	HMMPfam_HMG_box,HMMSmart_SM00398,superfamily_HMG-box,PatternScan_CYSTATIN,PatternScan_FLAGELLA_BB_ROD	0	pseudogene	MOC1	53	12	18.46	64	0	0	113	0	0	105	0	0
1	16759694	16759694	T	A	SNP	EG545306	XM_619609.4	mouse	genbank	58_37k	-1	model	missense	c.616	p.T206S	0	NULL	HMMPfam_HMG_box,HMMSmart_SM00398,superfamily_HMG-box,PatternScan_CYSTATIN,PatternScan_FLAGELLA_BB_ROD	0	pseudogene	MOC22	48	0	0	17	41	70.69	84	0	0	78	0	0
1	17087511	17087511	T	A	SNP	Jph1	NM_020604.1	mouse	genbank	58_37k	-1	provisional	missense	c.175	p.T59S	0	HMMPfam_MORN,HMMSmart_SM00698,superfamily_Histone H3 K4-specific methyltransferase SET7/9 N-terminal domain	HMMPfam_MORN,HMMSmart_SM00698,superfamily_Histone H3 K4-specific methyltransferase SET7/9 N-terminal domain	0	no_errors	MOC22	113	0	0	53	38	41.76	142	0	0	156	0	0
1	17151540	17151540	A	T	SNP	Gdap1	NM_010267.3	mouse	genbank	58_37k	1	validated	nonsense	c.1027	p.R343*	0	NULL	HMMPfam_GST_N,HMMPfam_GST_C,superfamily_Glutathione S-transferase (GST) C-terminal domain,superfamily_Thioredoxin-like	0	no_errors	MOC23	51	1	1.92	53	0	0	46	18	28.12	68	0	0
1	17385247	17385247	A	C	SNP	LOC383495	XR_031682.1	mouse	genbank	58_37k	1	model	rna	NULL	NULL	0	0	0	0	pseudogene	MOC23	86	0	0	81	0	0	92	22	19.3	117	0	0
1	17718974	17718974	A	T	SNP	Crispld1	NM_031402.2	mouse	genbank	58_37k	1	validated	silent	c.237	p.T79	0	HMMSmart_SCP,HMMPfam_SCP,superfamily_SCP-like_extracellular	HMMSmart_SCP,HMMPfam_LCCL,HMMSmart_LCCL,superfamily_LCCL,HMMPfam_SCP,superfamily_SCP-like_extracellular,PatternScan_CRISP_1,PatternScan_CRISP_2	0	no_errors	MOC23	98	0	0	87	0	0	97	25	20.49	114	0	0
1	17737661	17737661	A	T	SNP	Crispld1	NM_031402.2	mouse	genbank	58_37k	1	validated	nonsense	c.706	p.R236*	0	NULL	HMMSmart_SCP,HMMPfam_LCCL,HMMSmart_LCCL,superfamily_LCCL,HMMPfam_SCP,superfamily_SCP-like_extracellular,PatternScan_CRISP_1,PatternScan_CRISP_2	0	no_errors	MOC22	65	0	0	43	12	21.82	90	0	0	84	0	0
1	18114331	18114331	A	C	SNP	Crisp4	NM_030033.1	mouse	genbank	58_37k	-1	provisional	missense	c.518	p.V173G	0	HMMSmart_SCP,HMMPfam_SCP,superfamily_SCP-like_extracellular	HMMSmart_SCP,HMMPfam_Crisp,HMMPfam_SCP,superfamily_SCP-like_extracellular,PatternScan_CRISP_1	0	no_errors	MOC23	65	0	0	49	0	0	19	46	70.77	74	0	0
1	19144031	19144031	G	T	SNP	LOC100040413	XR_031764.1	mouse	genbank	58_37k	-1	model	rna	NULL	NULL	0	0	0	0	pseudogene	MOC22	25	0	0	14	18	56.25	47	1	2.08	53	0	0
1	19144077	19144077	G	C	SNP	LOC100040413	XR_031764.1	mouse	genbank	58_37k	-1	model	rna	NULL	NULL	0	0	0	0	pseudogene	MOC1	6	19	76	31	0	0	40	0	0	40	0	0
1	19216531	19216531	A	T	SNP	Tcfap2b	NM_009334.2	mouse	genbank	58_37k	1	validated	nonsense	c.616	p.K206*	0	NULL	HMMPfam_TF_AP-2	0	no_errors	MOC22	37	0	0	10	30	75	42	0	0	74	0	0
1	20212951	20212951	G	C	SNP	Pkhd1	NM_153179.3	mouse	genbank	58_37k	-1	validated	missense	c.8525	p.P2842R	0	HMMPfam_G8	HMMPfam_TIG,HMMSmart_SM00429,HMMSmart_SM00710,superfamily_Pectin lyase-like,superfamily_E set domains,PatternScan_EF_HAND_1,HMMPfam_G8,superfamily_Anthrax protective antigen	0	no_errors	MOC22	108	0	0	88	34	27.87	167	0	0	155	0	0
1	20348925	20348925	T	G	SNP	Pkhd1	NM_153179.3	mouse	genbank	58_37k	-1	validated	missense	c.7331	p.H2444P	0	superfamily_Pectin lyase-like	HMMPfam_TIG,HMMSmart_SM00429,HMMSmart_SM00710,superfamily_Pectin lyase-like,superfamily_E set domains,PatternScan_EF_HAND_1,HMMPfam_G8,superfamily_Anthrax protective antigen	0	no_errors	MOC23	30	0	0	46	0	0	35	12	25.53	45	1	2.17
1	20381623	20381623	T	A	SNP	Pkhd1	NM_153179.3	mouse	genbank	58_37k	-1	validated	missense	c.6398	p.N2133I	0	NULL	HMMPfam_TIG,HMMSmart_SM00429,HMMSmart_SM00710,superfamily_Pectin lyase-like,superfamily_E set domains,PatternScan_EF_HAND_1,HMMPfam_G8,superfamily_Anthrax protective antigen	0	no_errors	MOC22	74	0	0	50	15	23.08	101	0	0	92	0	0
1	20499162	20499162	A	T	SNP	Pkhd1	NM_153179.3	mouse	genbank	58_37k	-1	validated	missense	c.5400	p.H1800Q	0	superfamily_E set domains	HMMPfam_TIG,HMMSmart_SM00429,HMMSmart_SM00710,superfamily_Pectin lyase-like,superfamily_E set domains,PatternScan_EF_HAND_1,HMMPfam_G8,superfamily_Anthrax protective antigen	0	no_errors	MOC23	30	0	0	22	0	0	7	18	72	49	0	0
1	20514264	20514264	A	T	SNP	Pkhd1	NM_153179.3	mouse	genbank	58_37k	-1	validated	nonsense	c.3705	p.C1235*	0	HMMPfam_TIG,HMMSmart_SM00429,superfamily_E set domains	HMMPfam_TIG,HMMSmart_SM00429,HMMSmart_SM00710,superfamily_Pectin lyase-like,superfamily_E set domains,PatternScan_EF_HAND_1,HMMPfam_G8,superfamily_Anthrax protective antigen	0	no_errors	MOC23	47	0	0	44	0	0	16	37	69.81	49	0	0
1	20596578	20596578	T	C	SNP	Pkhd1	ENSMUST00000095072	mouse	ensembl	58_37k	-1	known	missense	c.509	p.H170R	0	NULL	NULL	0	no_errors	MOC23	31	0	0	22	0	0	12	31	72.09	34	0	0
1	20602803	20602803	A	T	SNP	Pkhd1	NM_153179.3	mouse	genbank	58_37k	-1	validated	silent	c.255	p.P85	0	NULL	HMMPfam_TIG,HMMSmart_SM00429,HMMSmart_SM00710,superfamily_Pectin lyase-like,superfamily_E set domains,PatternScan_EF_HAND_1,HMMPfam_G8,superfamily_Anthrax protective antigen	0	no_errors	MOC23	119	0	0	105	0	0	103	32	23.7	171	1	0.58
1	20803072	20803072	T	A	SNP	Mcm3	NM_008563.2	mouse	genbank	58_37k	-1	provisional	missense	c.1003	p.I335F	0	HMMPfam_MCM,HMMSmart_SM00350,superfamily_P-loop containing nucleoside triphosphate hydrolases	HMMPfam_MCM,HMMSmart_SM00350,HMMSmart_SM00382,superfamily_Nucleic acid-binding proteins,PatternScan_MCM_1,superfamily_P-loop containing nucleoside triphosphate hydrolases	0	no_errors	MOC23	76	0	0	71	0	0	82	22	20.95	104	0	0
1	20950476	20950476	T	C	SNP	Efhc1	ENSMUST00000038447	mouse	ensembl	58_37k	1	known	missense	c.551	p.V184A	0	HMMSmart_DM10	HMMSmart_DM10,HMMPfam_DUF1126,HMMPfam_efhand,superfamily_SSF47473	0	no_errors	MOC22	72	1	1.37	22	16	42.11	83	0	0	87	0	0
1	21288373	21288373	G	T	SNP	Gm4956	NR_002858.1	mouse	genbank	58_37k	-1	provisional	rna	NULL	NULL	0	0	0	0	pseudogene	MOC1	2	7	77.78	8	0	0	11	0	0	12	0	0
1	21359717	21359717	A	T	SNP	Khdc1c	NM_001033904.1	mouse	genbank	58_37k	1	provisional	missense	c.410	p.H137L	0	NULL	NULL	0	no_errors	MOC1	83	14	14.43	102	1	0.97	164	0	0	143	0	0
1	21477332	21477332	A	C	SNP	Kcnq5	NM_023872.3	mouse	genbank	58_37k	-1	validated	missense	c.1004	p.L335R	0	HMMPfam_Ion_trans,superfamily_SSF81324	HMMPfam_Ion_trans,HMMPfam_KCNQ_channel,superfamily_SSF81324	0	no_errors	MOC22	110	0	0	59	22	27.16	116	0	0	118	0	0
1	22363572	22363572	T	G	SNP	Rims1	ENSMUST00000097811	mouse	ensembl	58_37k	-1	known	missense	c.2978	p.Q993P	0	NULL	HMMPfam_C2,HMMSmart_SM00239,HMMPfam_PDZ,HMMSmart_SM00228,superfamily_PDZ domain-like,superfamily_C2 domain (Calcium/lipid-binding domain CaLB),superfamily_FYVE/PHD zinc finger,PatternScan_GLYCOSYL_HYDROL_F1_1,PatternScan_ATPASE_ALPHA_BETA	0	no_errors	MOC23	63	0	0	53	0	0	52	15	22.39	70	0	0
1	23262988	23262988	T	A	SNP	EG623356	XM_887803.3	mouse	genbank	58_37k	-1	model	silent	c.891	p.A297	0	NULL	NULL	0	no_errors	MOC1	46	9	16.36	37	0	0	57	0	0	73	0	0
1	24031659	24031659	C	A	SNP	Fam135a	NM_026604.4	mouse	genbank	58_37k	-1	validated	missense	c.3802	p.G1268W	0	HMMPfam_DUF676,superfamily_alpha/beta-Hydrolases	HMMPfam_DUF676,superfamily_alpha/beta-Hydrolases	0	no_errors	MOC22	130	0	0	94	39	29.32	159	1	0.62	157	0	0
1	24227633	24227633	A	T	SNP	Col9a1	NM_007740.3	mouse	genbank	58_37k	1	validated	silent	c.1500	p.A500	0	NULL	HMMSmart_SM00210,HMMPfam_Collagen,superfamily_Concanavalin A-like lectins/glucanases	0	no_errors	MOC1	53	11	17.19	41	0	0	73	0	0	54	0	0
1	24277254	24277254	T	A	SNP	Col19a1	NM_007733.2	mouse	genbank	58_37k	-1	validated	silent	c.3156	p.P1052	0	HMMPfam_Collagen	HMMSmart_TSPN,HMMPfam_Collagen,superfamily_ConA_like_lec_gl	0	no_errors	MOC1	58	11	15.94	52	0	0	75	0	0	98	0	0
1	24601174	24601174	G	T	SNP	LOC665829	XR_032129.1	mouse	genbank	58_37k	-1	model	rna	NULL	NULL	0	0	0	0	pseudogene	MOC23	129	0	0	124	0	0	59	141	70.5	208	0	0
1	24619437	24619437	C	T	SNP	ENSMUSG00000067736	ENSMUST00000088336	mouse	ensembl	58_37k	-1	known	missense	c.103	p.G35S	0	HMMPfam_Oxidored_q2	HMMPfam_Oxidored_q2	0	no_errors	MOC23	1905	2	0.1	1026	7	0.68	1287	1250	49.27	1917	6	0.31
1	25150932	25150932	C	G	SNP	Bai3	NM_175642.4	mouse	genbank	58_37k	-1	validated	missense	c.3917	p.S1306T	0	NULL	HMMPfam_GPS,HMMSmart_SM00303,HMMPfam_7tm_2,HMMPfam_TSP_1,HMMSmart_SM00209,superfamily_TSP-1 type 1 repeat,HMMPfam_HRM,HMMSmart_SM00008,PatternScan_G_PROTEIN_RECEP_F2_2	0	no_errors	MOC23	72	0	0	61	0	0	27	45	62.5	102	1	0.97
1	25185735	25185735	T	A	SNP	Bai3	NM_175642.4	mouse	genbank	58_37k	-1	validated	splice_site	c.2966-2	e20-2	0	0	0	0	no_errors	MOC1	71	13	15.48	74	0	0	95	0	0	101	0	0
1	25513923	25513923	A	T	SNP	Bai3	NM_175642.4	mouse	genbank	58_37k	-1	validated	nonsense	c.2021	p.L674*	0	NULL	HMMPfam_GPS,HMMSmart_SM00303,HMMPfam_7tm_2,HMMPfam_TSP_1,HMMSmart_SM00209,superfamily_TSP-1 type 1 repeat,HMMPfam_HRM,HMMSmart_SM00008,PatternScan_G_PROTEIN_RECEP_F2_2	0	no_errors	MOC23	163	0	0	176	0	0	70	163	69.96	255	0	0
1	25588804	25588804	A	T	SNP	Bai3	NM_175642.4	mouse	genbank	58_37k	-1	validated	missense	c.1436	p.M479K	0	HMMPfam_TSP_1,HMMSmart_SM00209,superfamily_TSP-1 type 1 repeat	HMMPfam_GPS,HMMSmart_SM00303,HMMPfam_7tm_2,HMMPfam_TSP_1,HMMSmart_SM00209,superfamily_TSP-1 type 1 repeat,HMMPfam_HRM,HMMSmart_SM00008,PatternScan_G_PROTEIN_RECEP_F2_2	0	no_errors	MOC23	68	0	0	40	0	0	53	23	30.26	103	0	0
1	25604262	25604262	T	A	SNP	Bai3	NM_175642.4	mouse	genbank	58_37k	-1	validated	silent	c.1194	p.P398	0	HMMSmart_SM00209,superfamily_TSP-1 type 1 repeat	HMMPfam_GPS,HMMSmart_SM00303,HMMPfam_7tm_2,HMMPfam_TSP_1,HMMSmart_SM00209,superfamily_TSP-1 type 1 repeat,HMMPfam_HRM,HMMSmart_SM00008,PatternScan_G_PROTEIN_RECEP_F2_2	0	no_errors	MOC1	29	4	12.12	44	0	0	62	0	0	41	0	0
1	25610566	25610566	G	A	SNP	Bai3	NM_175642.4	mouse	genbank	58_37k	-1	validated	silent	c.984	p.G328	0	HMMPfam_TSP_1,HMMSmart_SM00209,superfamily_TSP-1 type 1 repeat	HMMPfam_GPS,HMMSmart_SM00303,HMMPfam_7tm_2,HMMPfam_TSP_1,HMMSmart_SM00209,superfamily_TSP-1 type 1 repeat,HMMPfam_HRM,HMMSmart_SM00008,PatternScan_G_PROTEIN_RECEP_F2_2	0	no_errors	MOC22	47	0	0	39	23	37.1	66	0	0	77	0	0
1	25883113	25883113	G	T	SNP	Bai3	NM_175642.4	mouse	genbank	58_37k	-1	validated	missense	c.493	p.Q165K	0	NULL	HMMPfam_GPS,HMMSmart_SM00303,HMMPfam_7tm_2,HMMPfam_TSP_1,HMMSmart_SM00209,superfamily_TSP-1 type 1 repeat,HMMPfam_HRM,HMMSmart_SM00008,PatternScan_G_PROTEIN_RECEP_F2_2	0	no_errors	MOC23	119	0	0	106	0	0	95	48	33.57	198	0	0
1	26739939	26739939	T	G	SNP	4931408C20Rik	NM_001033764.3	mouse	genbank	58_37k	-1	validated	missense	c.3004	p.M1002L	0	NULL	NULL	0	no_errors	MOC23	132	0	0	125	0	0	48	112	70	212	2	0.93
1	26740625	26740625	A	G	SNP	4931408C20Rik	NM_001033764.3	mouse	genbank	58_37k	-1	validated	missense	c.2318	p.V773A	0	NULL	NULL	0	no_errors	MOC1	101	21	17.21	143	0	0	187	0	0	237	0	0
1	28994960	28994960	C	A	SNP	EG623924	XM_888439.1	mouse	genbank	58_37k	1	model	silent	c.108	p.T36	0	HMMPfam_Cpn10,superfamily_GroES-like,PatternScan_CHAPERONINS_CPN10	HMMPfam_Cpn10,superfamily_GroES-like,PatternScan_CHAPERONINS_CPN10	0	no_errors	MOC22	41	0	0	41	34	45.33	59	0	0	67	0	0
1	28994961	28994961	A	T	SNP	EG623924	XM_888439.1	mouse	genbank	58_37k	1	model	nonsense	c.109	p.K37*	0	HMMPfam_Cpn10,superfamily_GroES-like,PatternScan_CHAPERONINS_CPN10	HMMPfam_Cpn10,superfamily_GroES-like,PatternScan_CHAPERONINS_CPN10	0	no_errors	MOC22	41	0	0	41	35	46.05	59	0	0	68	0	0
1	29542189	29542189	A	T	SNP	EG433283	XM_484844.5	mouse	genbank	58_37k	-1	model	missense	c.572	p.F191Y	0	HMMPfam_GST_C,superfamily_Glutathione S-transferase (GST) C-terminal domain	HMMPfam_EF1G,superfamily_eEF1-gamma domain,HMMPfam_GST_N,HMMPfam_GST_C,superfamily_Glutathione S-transferase (GST) C-terminal domain,superfamily_Thioredoxin-like	0	pseudogene	MOC1	8	43	84.31	52	0	0	83	0	0	114	0	0
1	29542306	29542306	A	T	SNP	EG433283	XM_484844.5	mouse	genbank	58_37k	-1	model	missense	c.455	p.L152Q	0	HMMPfam_GST_C,superfamily_Glutathione S-transferase (GST) C-terminal domain	HMMPfam_EF1G,superfamily_eEF1-gamma domain,HMMPfam_GST_N,HMMPfam_GST_C,superfamily_Glutathione S-transferase (GST) C-terminal domain,superfamily_Thioredoxin-like	0	pseudogene	MOC22	41	0	0	37	14	27.45	44	0	0	79	1	1.25
1	30827013	30827013	A	T	SNP	EG624138	XR_001811.1	mouse	genbank	58_37k	1	model	rna	NULL	NULL	0	0	0	0	pseudogene	MOC22	183	0	0	56	99	63.87	233	1	0.43	253	0	0
1	30861511	30861511	C	A	SNP	Phf3	NM_001081080.1	mouse	genbank	58_37k	-1	provisional	silent	c.5211	p.P1737	0	NULL	HMMSmart_PHD,HMMPfam_TFIIS_M,superfamily_TFIIS_centre,superfamily_FYVE_PHD_ZnF,HMMPfam_SPOC,HMMSmart_TFS2M,PatternScan_ZF_PHD_1,HMMPfam_PHD	0	no_errors	MOC22	67	1	1.47	19	56	74.67	112	0	0	103	0	0
1	30869944	30869944	T	A	SNP	Phf3	NM_001081080.1	mouse	genbank	58_37k	-1	provisional	missense	c.3222	p.K1074N	0	NULL	HMMSmart_PHD,HMMPfam_TFIIS_M,superfamily_TFIIS_centre,superfamily_FYVE_PHD_ZnF,HMMPfam_SPOC,HMMSmart_TFS2M,PatternScan_ZF_PHD_1,HMMPfam_PHD	0	no_errors	MOC1	21	85	80.19	98	0	0	153	0	0	142	0	0
1	31260280	31260280	T	C	SNP	Lgsn	NM_153601.1	mouse	genbank	58_37k	1	provisional	silent	c.597	p.S199	0	HMMPfam_Gln-synt_N,superfamily_Gln_synt_beta	HMMPfam_Gln-synt_C,PatternScan_GLNA_ATP,HMMPfam_Gln-synt_N,PatternScan_GLNA_1,superfamily_Gln_synt_beta,superfamily_SSF55931	0	no_errors	MOC23	84	0	0	85	2	2.3	26	90	77.59	115	1	0.86
1	31280040	31280040	G	C	SNP	4930521A18Rik	NM_029062.2	mouse	genbank	58_37k	1	validated	missense	c.257	p.R86T	0	NULL	NULL	0	no_errors	MOC23	103	0	0	97	0	0	101	25	19.69	112	0	0
1	31673132	31673132	G	T	SNP	LOC624275	XR_035669.1	mouse	genbank	58_37k	1	model	rna	NULL	NULL	0	0	0	0	pseudogene	MOC22	188	0	0	116	68	36.96	229	0	0	238	0	0
1	34221077	34221077	C	A	SNP	Dst	NM_134448.2	mouse	genbank	58_37k	1	validated	missense	c.2221	p.H741N	0	HMMPfam_Spectrin,HMMSmart_SM00150,superfamily_Spectrin repeat	HMMPfam_Plectin,HMMSmart_SM00250,PatternScan_ACTININ_1,PatternScan_ACTININ_2,HMMPfam_CH,HMMSmart_SM00033,HMMPfam_Spectrin,HMMSmart_SM00054,HMMPfam_GAS2,HMMSmart_SM00243,superfamily_Calponin-homology domain CH-domain,HMMSmart_SM00150,PatternScan_EF_HAND_1,HMMPfam_efhand,superfamily_Spectrin repeat,superfamily_EF-hand,superfamily_Plakin repeat	0	no_errors	MOC1	10	47	82.46	39	0	0	78	0	0	61	0	0
1	34237177	34237177	A	T	SNP	Dst	ENSMUST00000027309	mouse	ensembl	58_37k	1	known	missense	c.5768	p.Q1923L	0	NULL	HMMPfam_Plectin,HMMSmart_SM00250,HMMPfam_Spectrin,HMMSmart_SM00150,superfamily_Spectrin repeat,superfamily_Plakin repeat	0	no_errors	MOC22	69	0	0	46	29	38.67	106	0	0	86	0	0
1	34248839	34248839	A	T	SNP	Dst	NM_134448.2	mouse	genbank	58_37k	1	validated	silent	c.8667	p.V2889	0	NULL	HMMPfam_Plectin,HMMSmart_SM00250,PatternScan_ACTININ_1,PatternScan_ACTININ_2,HMMPfam_CH,HMMSmart_SM00033,HMMPfam_Spectrin,HMMSmart_SM00054,HMMPfam_GAS2,HMMSmart_SM00243,superfamily_Calponin-homology domain CH-domain,HMMSmart_SM00150,PatternScan_EF_HAND_1,HMMPfam_efhand,superfamily_Spectrin repeat,superfamily_EF-hand,superfamily_Plakin repeat	0	no_errors	MOC23	30	0	0	33	0	0	16	45	73.77	49	0	0
1	34255370	34255370	A	T	SNP	Dst	NM_134448.2	mouse	genbank	58_37k	1	validated	missense	c.10847	p.Q3616L	0	HMMSmart_SM00150,superfamily_Spectrin repeat	HMMPfam_Plectin,HMMSmart_SM00250,PatternScan_ACTININ_1,PatternScan_ACTININ_2,HMMPfam_CH,HMMSmart_SM00033,HMMPfam_Spectrin,HMMSmart_SM00054,HMMPfam_GAS2,HMMSmart_SM00243,superfamily_Calponin-homology domain CH-domain,HMMSmart_SM00150,PatternScan_EF_HAND_1,HMMPfam_efhand,superfamily_Spectrin repeat,superfamily_EF-hand,superfamily_Plakin repeat	0	no_errors	MOC1	56	12	17.65	54	0	0	89	0	0	75	0	0
1	34268175	34268175	A	T	SNP	Dst	NM_134448.2	mouse	genbank	58_37k	1	validated	missense	c.12364	p.T4122S	0	HMMPfam_Spectrin,HMMSmart_SM00150,superfamily_Spectrin repeat	HMMPfam_Plectin,HMMSmart_SM00250,PatternScan_ACTININ_1,PatternScan_ACTININ_2,HMMPfam_CH,HMMSmart_SM00033,HMMPfam_Spectrin,HMMSmart_SM00054,HMMPfam_GAS2,HMMSmart_SM00243,superfamily_Calponin-homology domain CH-domain,HMMSmart_SM00150,PatternScan_EF_HAND_1,HMMPfam_efhand,superfamily_Spectrin repeat,superfamily_EF-hand,superfamily_Plakin repeat	0	no_errors	MOC23	119	0	0	154	0	0	163	45	21.63	181	0	0
1	34299547	34299547	A	T	SNP	Dst	NM_134448.2	mouse	genbank	58_37k	1	validated	silent	c.15852	p.A5284	0	HMMPfam_Spectrin,HMMSmart_SM00150,superfamily_Spectrin repeat	HMMPfam_Plectin,HMMSmart_SM00250,PatternScan_ACTININ_1,PatternScan_ACTININ_2,HMMPfam_CH,HMMSmart_SM00033,HMMPfam_Spectrin,HMMSmart_SM00054,HMMPfam_GAS2,HMMSmart_SM00243,superfamily_Calponin-homology domain CH-domain,HMMSmart_SM00150,PatternScan_EF_HAND_1,HMMPfam_efhand,superfamily_Spectrin repeat,superfamily_EF-hand,superfamily_Plakin repeat	0	no_errors	MOC23	60	0	0	38	0	0	21	41	66.13	50	0	0
1	34318986	34318986	G	A	SNP	Dst	NM_134448.2	mouse	genbank	58_37k	1	validated	missense	c.17735	p.S5912N	0	HMMPfam_Spectrin,HMMSmart_SM00150,superfamily_Spectrin repeat	HMMPfam_Plectin,HMMSmart_SM00250,PatternScan_ACTININ_1,PatternScan_ACTININ_2,HMMPfam_CH,HMMSmart_SM00033,HMMPfam_Spectrin,HMMSmart_SM00054,HMMPfam_GAS2,HMMSmart_SM00243,superfamily_Calponin-homology domain CH-domain,HMMSmart_SM00150,PatternScan_EF_HAND_1,HMMPfam_efhand,superfamily_Spectrin repeat,superfamily_EF-hand,superfamily_Plakin repeat	0	no_errors	MOC22	68	0	0	22	38	63.33	104	0	0	76	0	0
1	34344142	34344142	G	A	SNP	Dst	NM_134448.2	mouse	genbank	58_37k	1	validated	silent	c.20151	p.Q6717	0	HMMPfam_Spectrin,HMMSmart_SM00150,superfamily_Spectrin repeat	HMMPfam_Plectin,HMMSmart_SM00250,PatternScan_ACTININ_1,PatternScan_ACTININ_2,HMMPfam_CH,HMMSmart_SM00033,HMMPfam_Spectrin,HMMSmart_SM00054,HMMPfam_GAS2,HMMSmart_SM00243,superfamily_Calponin-homology domain CH-domain,HMMSmart_SM00150,PatternScan_EF_HAND_1,HMMPfam_efhand,superfamily_Spectrin repeat,superfamily_EF-hand,superfamily_Plakin repeat	0	no_errors	MOC22	57	0	0	30	20	40	63	0	0	56	0	0
1	34555412	34555412	A	T	SNP	Prss39	NM_009355.2	mouse	genbank	58_37k	1	provisional	silent	c.111	p.S37	0	NULL	HMMPfam_Trypsin,HMMSmart_Tryp_SPc,superfamily_Pept_Ser_Cys,PatternScan_TRYPSIN_HIS,PatternScan_TRYPSIN_SER	0	no_errors	MOC1	74	14	15.91	86	0	0	105	1	0.94	121	0	0
1	34559790	34559790	T	A	SNP	Prss39	NM_009355.2	mouse	genbank	58_37k	1	provisional	nonstop	c.1102	p.*368R	0	NULL	HMMPfam_Trypsin,HMMSmart_Tryp_SPc,superfamily_Pept_Ser_Cys,PatternScan_TRYPSIN_HIS,PatternScan_TRYPSIN_SER	0	no_errors	MOC22	174	0	0	73	110	60.11	284	0	0	235	0	0
1	36214256	36214256	T	A	SNP	Uggt1	NM_198899.2	mouse	genbank	58_37k	-1	validated	missense	c.3804	p.E1268D	0	superfamily_Nucleotide-diphospho-sugar transferases	PatternScan_ER_TARGET,HMMPfam_UDP-g_GGTase,superfamily_Nucleotide-diphospho-sugar transferases	0	no_errors	MOC1	25	113	81.88	139	0	0	187	1	0.53	156	0	0
1	36216810	36216810	T	A	SNP	Uggt1	NM_198899.2	mouse	genbank	58_37k	-1	validated	nonsense	c.3601	p.K1201*	0	NULL	PatternScan_ER_TARGET,HMMPfam_UDP-g_GGTase,superfamily_Nucleotide-diphospho-sugar transferases	0	no_errors	MOC22	132	0	0	32	66	67.35	147	1	0.68	136	0	0
1	36478349	36478349	G	A	SNP	Fer1l5	ENSMUST00000078633	mouse	ensembl	58_37k	1	known	nonsense	c.2627	p.W876*	0	NULL	HMMPfam_C2,HMMSmart_SM00239,superfamily_C2 domain (Calcium/lipid-binding domain CaLB)	0	no_errors	MOC23	174	0	0	166	0	0	84	162	65.85	220	1	0.45
1	36528898	36528898	A	T	SNP	Cnnm4	ENSMUST00000153128	mouse	ensembl	58_37k	1	known	missense	c.361	p.S121C	0	NULL	HMMPfam_CBS,HMMPfam_DUF21	0	no_errors	MOC1	19	77	79.38	94	0	0	155	0	0	144	0	0
1	36563348	36563348	A	T	SNP	Cnnm4	NM_033570.2	mouse	genbank	58_37k	1	validated	missense	c.1832	p.N611I	0	NULL	HMMPfam_CBS,HMMPfam_DUF21,superfamily_CBS-domain	0	no_errors	MOC22	100	0	0	49	21	30	143	0	0	97	1	1.02
1	36590847	36590847	A	T	SNP	Ankrd23	NM_153502.3	mouse	genbank	58_37k	-1	provisional	silent	c.288	p.P96	0	superfamily_Ankyrin repeat	HMMPfam_Ank,HMMSmart_SM00248,superfamily_Ankyrin repeat	0	no_errors	MOC1	20	65	76.47	64	0	0	102	0	0	70	0	0
1	36836682	36836682	T	A	SNP	Zap70	NM_009539.2	mouse	genbank	58_37k	1	provisional	missense	c.1232	p.L411Q	0	HMMPfam_Pkinase_Tyr,HMMSmart_SM00219,HMMSmart_SM00220,superfamily_Protein kinase-like (PK-like)	HMMPfam_SH2,HMMSmart_SM00252,HMMPfam_Pkinase_Tyr,HMMSmart_SM00219,HMMSmart_SM00220,PatternScan_PROTEIN_KINASE_TYR,superfamily_Protein kinase-like (PK-like),PatternScan_PROTEIN_KINASE_ATP,superfamily_SH2 domain	0	no_errors	MOC22	75	0	0	40	25	38.46	98	0	0	100	0	0
1	36836683	36836683	G	A	SNP	Zap70	NM_009539.2	mouse	genbank	58_37k	1	provisional	silent	c.1233	p.L411	0	HMMPfam_Pkinase_Tyr,HMMSmart_SM00219,HMMSmart_SM00220,superfamily_Protein kinase-like (PK-like)	HMMPfam_SH2,HMMSmart_SM00252,HMMPfam_Pkinase_Tyr,HMMSmart_SM00219,HMMSmart_SM00220,PatternScan_PROTEIN_KINASE_TYR,superfamily_Protein kinase-like (PK-like),PatternScan_PROTEIN_KINASE_ATP,superfamily_SH2 domain	0	no_errors	MOC22	75	0	0	39	26	40	99	0	0	98	0	0
1	36875770	36875770	T	A	SNP	Tmem131	NM_018872.2	mouse	genbank	58_37k	-1	validated	missense	c.2246	p.H749L	0	NULL	NULL	0	no_errors	MOC23	199	0	0	172	0	0	60	165	73.33	199	0	0
1	37214289	37214289	T	A	SNP	ENSMUSG00000026115	ENSMUST00000027289	mouse	ensembl	58_37k	1	known	missense	c.151	p.Y51N	0	NULL	NULL	0	no_errors	MOC1	9	73	89.02	101	0	0	125	0	0	131	0	0
1	38124365	38124365	T	A	SNP	Rev1	NM_019570.3	mouse	genbank	58_37k	-1	validated	missense	c.1925	p.Q642L	0	HMMPfam_IMS,superfamily_SSF56672	HMMPfam_IMS,HMMPfam_BRCT,HMMSmart_BRCT,superfamily_BRCT,superfamily_DNA_pol_Y-fam_little_finger,superfamily_SSF56672	0	no_errors	MOC22	36	0	0	6	19	76	44	0	0	48	0	0
1	38165314	38165314	T	A	SNP	Rev1	NM_019570.3	mouse	genbank	58_37k	-1	validated	splice_site	c.1-2	e1-2	0	0	0	0	no_errors	MOC23	248	0	0	198	1	0.5	77	229	74.59	281	0	0
1	38870113	38870113	A	T	SNP	Lonrf2	NM_001029878.1	mouse	genbank	58_37k	-1	provisional	missense	c.501	p.D167E	0	superfamily_SSF48452	HMMSmart_RING,HMMPfam_LON,PatternScan_ZF_RING_1,HMMPfam_zf-C3HC4,superfamily_SSF48452,superfamily_SSF57850	0	no_errors	MOC23	55	0	0	42	0	0	35	19	35.19	61	1	1.61
1	38922606	38922606	A	T	SNP	Chst10	NM_145142.2	mouse	genbank	58_37k	-1	validated	missense	c.862	p.C288S	0	HMMPfam_Sulfotransfer_2	HMMPfam_Sulfotransfer_2	0	no_errors	MOC22	81	0	0	54	31	36.47	114	0	0	124	0	0
1	38922774	38922774	T	A	SNP	Chst10	NM_145142.2	mouse	genbank	58_37k	-1	validated	missense	c.694	p.R232W	0	HMMPfam_Sulfotransfer_2	HMMPfam_Sulfotransfer_2	0	no_errors	MOC23	38	0	0	24	0	0	32	11	25.58	42	0	0
1	39372049	39372049	T	A	SNP	LOC100041999	XM_001477395.1	mouse	genbank	58_37k	1	model	silent	c.228	p.A76	0	HMMPfam_Ribosomal_L22,superfamily_Ribosomal protein L22	HMMPfam_Ribosomal_L22,superfamily_Ribosomal protein L22	0	pseudogene	MOC23	124	0	0	143	0	0	126	49	28	144	0	0
1	39451052	39451052	T	A	SNP	Tbc1d8	NM_018775.4	mouse	genbank	58_37k	-1	validated	missense	c.893	p.K298M	0	HMMPfam_GRAM,HMMSmart_GRAM	HMMPfam_TBC,HMMSmart_TBC,superfamily_RabGAP_TBC,HMMPfam_GRAM,HMMSmart_GRAM,superfamily_SSF47473	0	no_errors	MOC22	110	0	0	95	33	25.78	151	0	0	161	0	0
1	39576553	39576553	C	A	SNP	ENSMUSG00000065629	ENSMUST00000083695	mouse	ensembl	58_37k	1	novel	rna	NULL	NULL	0	0	0	0	no_errors	MOC22	12	0	0	4	8	66.67	8	0	0	11	0	0
1	39729135	39729135	T	A	SNP	ENSMUSG00000057173	ENSMUST00000151913	mouse	ensembl	58_37k	-1	known	missense	c.1178	p.N393I	0	NULL	HMMPfam_RFX_DNA_binding,superfamily_Winged helix DNA-binding domain	0	no_errors	MOC22	34	0	0	7	22	75.86	35	0	0	29	0	0
1	39737795	39737795	A	T	SNP	ENSMUSG00000057173	ENSMUST00000151913	mouse	ensembl	58_37k	-1	known	missense	c.964	p.S322T	0	NULL	HMMPfam_RFX_DNA_binding,superfamily_Winged helix DNA-binding domain	0	no_errors	MOC22	78	0	0	56	13	18.84	93	0	0	92	0	0
1	40033615	40033615	A	T	SNP	Map4k4	NM_008696.2	mouse	genbank	58_37k	1	validated	missense	c.370	p.T124S	0	HMMSmart_SM00219,HMMSmart_SM00220,superfamily_Protein kinase-like (PK-like),HMMPfam_Pkinase	HMMPfam_CNH,HMMSmart_SM00036,HMMSmart_SM00219,HMMSmart_SM00220,PatternScan_PROTEIN_KINASE_ST,superfamily_Protein kinase-like (PK-like),PatternScan_PROTEIN_KINASE_ATP,HMMPfam_Pkinase	0	no_errors	MOC22	143	1	0.69	47	81	63.28	191	1	0.52	170	1	0.58
1	40042086	40042086	A	T	SNP	Map4k4	NM_008696.2	mouse	genbank	58_37k	1	validated	missense	c.754	p.R252W	0	HMMSmart_SM00219,HMMSmart_SM00220,superfamily_Protein kinase-like (PK-like),HMMPfam_Pkinase	HMMPfam_CNH,HMMSmart_SM00036,HMMSmart_SM00219,HMMSmart_SM00220,PatternScan_PROTEIN_KINASE_ST,superfamily_Protein kinase-like (PK-like),PatternScan_PROTEIN_KINASE_ATP,HMMPfam_Pkinase	0	no_errors	MOC23	77	1	1.28	71	0	0	61	17	21.79	74	0	0
1	40046932	40046932	A	T	SNP	Map4k4	NM_008696.2	mouse	genbank	58_37k	1	validated	splice_site	c.1023-2	e12-2	0	0	0	0	no_errors	MOC22	69	0	0	38	29	43.28	71	0	0	78	0	0
1	40174839	40174839	T	A	SNP	Il1r2	NM_010555.4	mouse	genbank	58_37k	1	provisional	missense	c.764	p.L255Q	0	HMMSmart_SM00409,superfamily_Immunoglobulin	HMMSmart_SM00408,HMMSmart_SM00409,HMMPfam_V-set,HMMPfam_ig,PatternScan_ABC_TRANSPORTER_1,superfamily_Immunoglobulin	0	no_errors	MOC22	173	0	0	63	136	68.34	280	2	0.71	227	0	0
1	40369314	40369314	G	A	SNP	Il1r1	NM_008362.2	mouse	genbank	58_37k	1	validated	missense	c.1267	p.G423R	0	HMMPfam_TIR,HMMSmart_SM00255,superfamily_Toll/Interleukin receptor TIR domain	HMMPfam_TIR,HMMSmart_SM00255,superfamily_Toll/Interleukin receptor TIR domain,HMMSmart_SM00409,HMMPfam_ig,superfamily_Immunoglobulin	0	no_errors	MOC23	160	0	0	103	0	0	41	121	74.69	148	0	0
1	40399968	40399968	G	A	SNP	Il1rl2	NM_133193.3	mouse	genbank	58_37k	1	provisional	silent	c.594	p.A198	0	HMMSmart_SM00408,HMMSmart_SM00409,HMMPfam_ig,superfamily_Immunoglobulin	HMMPfam_TIR,HMMSmart_SM00255,superfamily_Toll/Interleukin receptor TIR domain,HMMSmart_SM00408,HMMSmart_SM00409,HMMPfam_V-set,HMMPfam_ig,superfamily_Immunoglobulin	0	no_errors	MOC22	91	0	0	27	49	64.47	127	0	0	106	0	0
1	40911696	40911696	T	A	SNP	Tmem182	NM_001081198.1	mouse	genbank	58_37k	1	provisional	silent	c.525	p.A175	0	NULL	NULL	0	no_errors	MOC23	52	0	0	53	1	1.85	22	55	71.43	76	1	1.3
1	42755056	42755056	A	T	SNP	Pou3f3	NM_008900.2	mouse	genbank	58_37k	1	validated	missense	c.1066	p.T356S	0	HMMPfam_Pou,HMMSmart_SM00352,PatternScan_POU_2,superfamily_lambda repressor-like DNA-binding domains	HMMPfam_Pou,HMMSmart_SM00352,PatternScan_POU_1,PatternScan_POU_2,HMMPfam_Homeobox,HMMSmart_SM00389,superfamily_Homeodomain-like,superfamily_lambda repressor-like DNA-binding domains,PatternScan_HOMEOBOX_1	0	no_errors	MOC1	89	16	14.95	86	0	0	120	1	0.83	169	0	0
1	43087060	43087060	A	T	SNP	ENSMUSG00000079586	ENSMUST00000114760	mouse	ensembl	58_37k	1	known	silent	c.144	p.T48	0	NULL	NULL	0	no_errors	MOC23	140	0	0	123	0	0	48	113	70.19	179	1	0.56
1	43116827	43116827	T	A	SNP	Tgfbrap1	NM_001013025.2	mouse	genbank	58_37k	-1	validated	missense	c.1361	p.K454M	0	HMMPfam_Vps39_1	superfamily_ARM repeat,HMMPfam_Vps39_1,HMMPfam_Vps39_2	0	no_errors	MOC23	116	0	0	110	0	0	31	113	78.47	152	0	0
1	43132136	43132136	T	A	SNP	Tgfbrap1	NM_001013025.2	mouse	genbank	58_37k	-1	validated	silent	c.648	p.I216	0	NULL	superfamily_ARM repeat,HMMPfam_Vps39_1,HMMPfam_Vps39_2	0	no_errors	MOC1	139	36	20.57	141	0	0	228	0	0	266	0	0
1	43132187	43132187	C	A	SNP	Tgfbrap1	NM_001013025.2	mouse	genbank	58_37k	-1	validated	missense	c.597	p.Q199H	0	NULL	superfamily_ARM repeat,HMMPfam_Vps39_1,HMMPfam_Vps39_2	0	no_errors	MOC22	203	0	0	52	115	68.86	282	0	0	304	0	0
1	44028541	44028541	G	T	SNP	Tpp2	NM_009418.2	mouse	genbank	58_37k	1	provisional	missense	c.1642	p.G548C	0	NULL	HMMPfam_Peptidase_S8,PatternScan_SUBTILASE_HIS,PatternScan_SUBTILASE_SER,superfamily_Subtilisin-like,PatternScan_IG_MHC	0	no_errors	MOC22	85	0	0	25	53	67.95	113	0	0	87	0	0
1	44029491	44029491	G	T	SNP	Tpp2	NM_009418.2	mouse	genbank	58_37k	1	provisional	missense	c.1795	p.V599L	0	NULL	HMMPfam_Peptidase_S8,PatternScan_SUBTILASE_HIS,PatternScan_SUBTILASE_SER,superfamily_Subtilisin-like,PatternScan_IG_MHC	0	no_errors	MOC23	99	0	0	109	0	0	41	104	71.72	108	0	0
1	44038706	44038706	A	G	SNP	Tpp2	NM_009418.2	mouse	genbank	58_37k	1	provisional	silent	c.2622	p.P874	0	NULL	HMMPfam_Peptidase_S8,PatternScan_SUBTILASE_HIS,PatternScan_SUBTILASE_SER,superfamily_Subtilisin-like,PatternScan_IG_MHC	0	no_errors	MOC22	42	0	0	37	9	19.57	51	0	0	43	0	0
1	44143739	44143739	T	A	SNP	1700029F09Rik	ENSMUST00000027215	mouse	ensembl	58_37k	-1	known	missense	c.674	p.K225I	0	NULL	superfamily_SSF53474	0	no_errors	MOC1	22	120	84.51	100	0	0	181	1	0.55	158	0	0
1	44183280	44183280	A	T	SNP	Bivm	NM_144558.4	mouse	genbank	58_37k	1	validated	missense	c.44	p.H15L	0	NULL	NULL	0	no_errors	MOC22	63	0	0	35	23	39.66	85	0	0	69	0	0
1	44235094	44235094	A	T	SNP	Ercc5	NM_011729.2	mouse	genbank	58_37k	1	validated	missense	c.2751	p.L917F	0	superfamily_5' to 3' exonuclease C-terminal subdomain	HMMPfam_XPG_N,HMMSmart_SM00485,HMMPfam_XPG_I,HMMSmart_SM00484,PatternScan_XPG_2,HMMSmart_SM00279,PatternScan_XPG_1,superfamily_5' to 3' exonuclease C-terminal subdomain,superfamily_PIN domain-like	0	no_errors	MOC23	29	0	0	44	0	0	15	29	65.91	50	0	0
1	45396796	45396796	T	A	SNP	Col3a1	NM_009930.2	mouse	genbank	58_37k	1	validated	silent	c.2520	p.P840	0	HMMPfam_Collagen	HMMPfam_COLFI,HMMSmart_SM00038,HMMPfam_VWC,HMMSmart_SM00214,PatternScan_VWFC_1,HMMPfam_Collagen	0	no_errors	MOC23	33	0	0	31	0	0	30	7	18.42	52	0	0
1	45397838	45397838	G	T	SNP	Col3a1	NM_009930.2	mouse	genbank	58_37k	1	validated	missense	c.2786	p.G929V	0	HMMPfam_Collagen	HMMPfam_COLFI,HMMSmart_SM00038,HMMPfam_VWC,HMMSmart_SM00214,PatternScan_VWFC_1,HMMPfam_Collagen	0	no_errors	MOC23	85	0	0	72	0	0	76	31	28.97	130	0	0
1	45401304	45401304	G	C	SNP	Col3a1	NM_009930.2	mouse	genbank	58_37k	1	validated	missense	c.3253	p.G1085R	0	HMMPfam_Collagen	HMMPfam_COLFI,HMMSmart_SM00038,HMMPfam_VWC,HMMSmart_SM00214,PatternScan_VWFC_1,HMMPfam_Collagen	0	no_errors	MOC23	95	0	0	94	0	0	88	25	22.12	133	0	0
1	45401833	45401833	G	T	SNP	Col3a1	NM_009930.2	mouse	genbank	58_37k	1	validated	nonsense	c.3451	p.G1151*	0	HMMPfam_Collagen	HMMPfam_COLFI,HMMSmart_SM00038,HMMPfam_VWC,HMMSmart_SM00214,PatternScan_VWFC_1,HMMPfam_Collagen	0	no_errors	MOC22	102	0	0	45	27	37.5	108	0	0	118	1	0.84
1	45433039	45433039	A	T	SNP	Col5a2	NM_007737.2	mouse	genbank	58_37k	-1	validated	missense	c.4384	p.Y1462N	0	HMMPfam_COLFI,HMMSmart_COLFI	HMMPfam_COLFI,HMMSmart_COLFI,HMMPfam_VWC,HMMSmart_VWC,PatternScan_VWFC_1,HMMPfam_Collagen	0	no_errors	MOC1	11	5	31.25	18	0	0	15	0	0	9	0	0
1	45461584	45461584	A	T	SNP	Col5a2	NM_007737.2	mouse	genbank	58_37k	-1	validated	silent	c.1704	p.G568	0	HMMPfam_Collagen	HMMPfam_COLFI,HMMSmart_COLFI,HMMPfam_VWC,HMMSmart_VWC,PatternScan_VWFC_1,HMMPfam_Collagen	0	no_errors	MOC23	55	0	0	67	0	0	55	25	31.25	98	1	1.01
1	45499682	45499682	T	A	SNP	Col5a2	NM_007737.2	mouse	genbank	58_37k	-1	validated	missense	c.126	p.Q42H	0	HMMPfam_VWC,HMMSmart_VWC	HMMPfam_COLFI,HMMSmart_COLFI,HMMPfam_VWC,HMMSmart_VWC,PatternScan_VWFC_1,HMMPfam_Collagen	0	no_errors	MOC22	68	0	0	46	20	30.3	74	0	0	91	0	0
1	45659444	45659444	A	T	SNP	LOC666814	XM_001477007.1	mouse	genbank	58_37k	1	model	missense	c.308	p.H103L	0	HMMPfam_Ribosomal_L22,superfamily_Ribosomal protein L22	HMMPfam_Ribosomal_L22,superfamily_Ribosomal protein L22	0	pseudogene	MOC23	64	0	0	61	0	0	50	23	31.51	83	0	0
1	45855920	45855920	G	T	SNP	Wdr75	NM_028599.2	mouse	genbank	58_37k	1	provisional	missense	c.143	p.C48F	0	HMMSmart_WD40,superfamily_WD40_like,HMMPfam_WD40	HMMSmart_WD40,superfamily_WD40_like,HMMPfam_WD40	0	no_errors	MOC23	55	0	0	48	0	0	41	13	24.07	67	0	0
1	45946947	45946947	C	G	SNP	LOC383644	XR_033039.1	mouse	genbank	58_37k	-1	model	rna	NULL	NULL	0	0	0	0	pseudogene	MOC22	131	0	0	68	32	32	174	0	0	184	0	0
1	45966514	45966514	T	A	SNP	Slc40a1	NM_016917.2	mouse	genbank	58_37k	-1	validated	missense	c.1450	p.I484F	0	superfamily_MFS_gen_substrate_transporter	HMMPfam_FPN1,superfamily_MFS_gen_substrate_transporter	0	no_errors	MOC1	55	15	21.43	65	0	0	94	0	0	64	0	0
1	46173115	46173115	T	A	SNP	ENSMUSG00000079572	ENSMUST00000078657	mouse	ensembl	58_37k	1	known	missense	c.845	p.L282Q	0	NULL	NULL	0	no_stop_codon	MOC23	269	1	0.37	256	1	0.39	258	91	26.07	407	0	0
1	46689166	46689166	T	A	SNP	Dnahc7a	ENSMUST00000094964	mouse	ensembl	58_37k	1	known	silent	c.4863	p.A1621	0	HMMPfam_AAA_5,superfamily_P-loop containing nucleoside triphosphate hydrolases	PatternScan_ADH_SHORT,HMMSmart_SM00382,HMMPfam_Dynein_heavy,HMMPfam_AAA_5,HMMPfam_DHC_N2,PatternScan_EF_HAND_1,superfamily_P-loop containing nucleoside triphosphate hydrolases	0	no_errors	MOC22	146	0	0	55	96	63.58	182	0	0	209	1	0.48
1	46715163	46715163	T	A	SNP	Dnahc7a	ENSMUST00000094964	mouse	ensembl	58_37k	1	known	missense	c.6386	p.L2129Q	0	superfamily_P-loop containing nucleoside triphosphate hydrolases	PatternScan_ADH_SHORT,HMMSmart_SM00382,HMMPfam_Dynein_heavy,HMMPfam_AAA_5,HMMPfam_DHC_N2,PatternScan_EF_HAND_1,superfamily_P-loop containing nucleoside triphosphate hydrolases	0	no_errors	MOC22	148	0	0	85	45	34.62	157	0	0	161	1	0.62
1	46737365	46737365	T	A	SNP	Dnahc7a	ENSMUST00000094964	mouse	ensembl	58_37k	1	known	silent	c.8124	p.A2708	0	NULL	PatternScan_ADH_SHORT,HMMSmart_SM00382,HMMPfam_Dynein_heavy,HMMPfam_AAA_5,HMMPfam_DHC_N2,PatternScan_EF_HAND_1,superfamily_P-loop containing nucleoside triphosphate hydrolases	0	no_errors	MOC23	200	0	0	176	1	0.56	52	182	77.78	245	4	1.61
1	46841389	46841389	T	G	SNP	Dnahc7a	ENSMUST00000094964	mouse	ensembl	58_37k	1	known	missense	c.11330	p.M3777R	0	HMMPfam_Dynein_heavy	PatternScan_ADH_SHORT,HMMSmart_SM00382,HMMPfam_Dynein_heavy,HMMPfam_AAA_5,HMMPfam_DHC_N2,PatternScan_EF_HAND_1,superfamily_P-loop containing nucleoside triphosphate hydrolases	0	no_errors	MOC1	88	21	19.27	110	0	0	141	0	0	182	0	0
1	46892444	46892444	C	T	SNP	Slc39a10	NM_172653.2	mouse	genbank	58_37k	-1	provisional	missense	c.542	p.R181H	0	NULL	HMMPfam_Zip	0	no_errors	MOC22	76	0	0	63	13	17.11	98	1	1.01	80	0	0
1	52201077	52201077	A	T	SNP	Stat1	NM_009283.3	mouse	genbank	58_37k	1	validated	missense	c.1157	p.H386L	0	superfamily_P53_like_DNA_bnd,HMMPfam_STAT_bind	HMMPfam_SH2,HMMSmart_SH2,superfamily_P53_like_DNA_bnd,HMMPfam_STAT_int,superfamily_STAT,HMMPfam_STAT_alpha,HMMPfam_STAT_bind,superfamily_SSF55550	0	no_errors	MOC22	153	1	0.65	41	77	65.25	180	1	0.55	170	1	0.58
1	52248127	52248127	C	T	SNP	Gls	NM_001081081.2	mouse	genbank	58_37k	-1	validated	missense	c.1268	p.C423Y	0	superfamily_beta-lactamase/transpeptidase-like,HMMPfam_Glutaminase	HMMPfam_Ank,HMMSmart_SM00248,superfamily_Ankyrin repeat,superfamily_beta-lactamase/transpeptidase-like,HMMPfam_Glutaminase	0	no_errors	MOC23	67	0	0	43	0	0	26	33	55	79	0	0
1	52547601	52547601	T	A	SNP	Nab1	NM_008667.3	mouse	genbank	58_37k	-1	validated	splice_site	c.1-2	e1-2	0	0	0	0	no_errors	MOC1	11	41	78.85	69	0	0	89	0	0	83	0	0
1	52846686	52846686	T	A	SNP	Inpp1	NM_008384.2	mouse	genbank	58_37k	-1	validated	silent	c.1017	p.P339	0	HMMPfam_Inositol_P,superfamily_SSF56655	HMMPfam_Inositol_P,PatternScan_IMP_2,PatternScan_IMP_1,superfamily_SSF56655	0	no_errors	MOC23	155	0	0	139	1	0.71	49	149	74.87	211	1	0.47
1	52916947	52916947	A	C	SNP	Hibch	NM_146108.1	mouse	genbank	58_37k	1	provisional	silent	c.154	p.R52	0	HMMPfam_ECH,superfamily_SSF52096	HMMPfam_ECH,PatternScan_ENOYL_COA_HYDRATASE,superfamily_SSF52096	0	no_errors	MOC23	50	1	1.96	48	1	2.04	19	54	73.97	63	1	1.56
1	53215593	53215593	A	T	SNP	1700019A02Rik	ENSMUST00000072235	mouse	ensembl	58_37k	-1	known	nonstop	c.439	p.*147R	0	NULL	NULL	0	no_errors	MOC1	33	4	10.81	36	0	0	52	0	0	40	0	0
1	53263595	53263595	C	A	SNP	Pms1	NM_153556.1	mouse	genbank	58_37k	-1	provisional	missense	c.1628	p.R543I	0	superfamily_HMG-box	HMMPfam_HMG_box,HMMSmart_HMG,HMMPfam_HATPase_c,HMMSmart_HATPase_c,superfamily_ATP_bd_ATPase,superfamily_HMG-box,HMMPfam_DNA_mis_repair,PatternScan_DNA_MISMATCH_REPAIR_1,superfamily_Ribosomal_S5_D2-typ_fold	0	no_errors	MOC23	141	0	0	128	0	0	131	43	24.71	169	0	0
1	53338893	53338893	T	A	SNP	Pms1	NM_153556.1	mouse	genbank	58_37k	-1	provisional	silent	c.24	p.T8	0	superfamily_ATP_bd_ATPase	HMMPfam_HMG_box,HMMSmart_HMG,HMMPfam_HATPase_c,HMMSmart_HATPase_c,superfamily_ATP_bd_ATPase,superfamily_HMG-box,HMMPfam_DNA_mis_repair,PatternScan_DNA_MISMATCH_REPAIR_1,superfamily_Ribosomal_S5_D2-typ_fold	0	no_errors	MOC23	67	0	0	54	0	0	45	8	15.09	59	0	0
1	53454017	53454017	G	A	SNP	Dnahc7	XM_001477662.1	mouse	genbank	58_37k	-1	model	silent	c.11895	p.P3965	0	HMMPfam_Dynein_heavy	PatternScan_ADH_SHORT,HMMSmart_SM00382,HMMPfam_Dynein_heavy,HMMPfam_AAA_5,HMMPfam_DHC_N2,PatternScan_EF_HAND_1,superfamily_P-loop containing nucleoside triphosphate hydrolases	0	no_errors	MOC23	52	0	0	66	1	1.49	69	26	27.37	99	0	0
1	53482111	53482111	A	T	SNP	Dnahc7	XM_001477662.1	mouse	genbank	58_37k	-1	model	missense	c.10850	p.L3617Q	0	HMMPfam_Dynein_heavy	PatternScan_ADH_SHORT,HMMSmart_SM00382,HMMPfam_Dynein_heavy,HMMPfam_AAA_5,HMMPfam_DHC_N2,PatternScan_EF_HAND_1,superfamily_P-loop containing nucleoside triphosphate hydrolases	0	no_errors	MOC22	155	0	0	100	54	34.84	239	0	0	234	0	0
1	53558508	53558508	A	T	SNP	Dnahc7	XM_001477662.1	mouse	genbank	58_37k	-1	model	missense	c.7436	p.L2479Q	0	superfamily_P-loop containing nucleoside triphosphate hydrolases	PatternScan_ADH_SHORT,HMMSmart_SM00382,HMMPfam_Dynein_heavy,HMMPfam_AAA_5,HMMPfam_DHC_N2,PatternScan_EF_HAND_1,superfamily_P-loop containing nucleoside triphosphate hydrolases	0	no_errors	MOC22	104	0	0	40	68	62.96	121	0	0	140	0	0
1	53575480	53575480	G	A	SNP	Dnahc7	XM_001477662.1	mouse	genbank	58_37k	-1	model	silent	c.6504	p.R2168	0	superfamily_P-loop containing nucleoside triphosphate hydrolases	PatternScan_ADH_SHORT,HMMSmart_SM00382,HMMPfam_Dynein_heavy,HMMPfam_AAA_5,HMMPfam_DHC_N2,PatternScan_EF_HAND_1,superfamily_P-loop containing nucleoside triphosphate hydrolases	0	no_errors	MOC1	14	93	86.11	113	0	0	137	0	0	139	0	0
1	53575636	53575636	A	T	SNP	Dnahc7	XM_001477662.1	mouse	genbank	58_37k	-1	model	missense	c.6348	p.N2116K	0	superfamily_P-loop containing nucleoside triphosphate hydrolases	PatternScan_ADH_SHORT,HMMSmart_SM00382,HMMPfam_Dynein_heavy,HMMPfam_AAA_5,HMMPfam_DHC_N2,PatternScan_EF_HAND_1,superfamily_P-loop containing nucleoside triphosphate hydrolases	0	no_errors	MOC1	110	24	17.91	127	0	0	189	0	0	212	0	0
1	53677548	53677548	A	T	SNP	Dnahc7	XM_001477662.1	mouse	genbank	58_37k	-1	model	missense	c.2030	p.V677E	0	NULL	PatternScan_ADH_SHORT,HMMSmart_SM00382,HMMPfam_Dynein_heavy,HMMPfam_AAA_5,HMMPfam_DHC_N2,PatternScan_EF_HAND_1,superfamily_P-loop containing nucleoside triphosphate hydrolases	0	no_errors	MOC22	122	0	0	73	30	29.13	162	1	0.61	112	0	0
1	53741759	53741759	T	C	SNP	Dnahc7	XM_001477662.1	mouse	genbank	58_37k	-1	model	silent	c.276	p.S92	0	NULL	PatternScan_ADH_SHORT,HMMSmart_SM00382,HMMPfam_Dynein_heavy,HMMPfam_AAA_5,HMMPfam_DHC_N2,PatternScan_EF_HAND_1,superfamily_P-loop containing nucleoside triphosphate hydrolases	0	no_errors	MOC23	76	0	0	91	0	0	74	31	29.52	71	0	0
1	53822778	53822778	T	A	SNP	Stk17b	NM_133810.3	mouse	genbank	58_37k	-1	validated	missense	c.467	p.H156L	0	HMMSmart_S_TKc,PatternScan_PROTEIN_KINASE_ST,superfamily_Kinase_like,HMMPfam_Pkinase	HMMSmart_S_TKc,PatternScan_PROTEIN_KINASE_ST,superfamily_Kinase_like,PatternScan_PROTEIN_KINASE_ATP,HMMPfam_Pkinase	0	no_errors	MOC23	75	0	0	73	1	1.35	61	14	18.67	65	0	0
1	53921947	53921947	A	T	SNP	Hecw2	NM_001001883.	mouse	genbank	58_37k	-1	validated	missense	c.3485	p.L1162H	0	NULL	HMMPfam_C2,HMMSmart_SM00239,HMMPfam_HECT,HMMSmart_SM00119,superfamily_Hect E3 ligase catalytic domain,HMMPfam_WW,HMMSmart_SM00456,PatternScan_WW_DOMAIN_1,superfamily_WW domain,superfamily_C2 domain (Calcium/lipid-binding domain CaLB)	0	no_errors	MOC23	27	0	0	22	0	0	29	13	30.23	40	0	0
1	53983137	53983137	G	A	SNP	Hecw2	NM_001001883.	mouse	genbank	58_37k	-1	validated	missense	c.1373	p.A458V	0	NULL	HMMPfam_C2,HMMSmart_SM00239,HMMPfam_HECT,HMMSmart_SM00119,superfamily_Hect E3 ligase catalytic domain,HMMPfam_WW,HMMSmart_SM00456,PatternScan_WW_DOMAIN_1,superfamily_WW domain,superfamily_C2 domain (Calcium/lipid-binding domain CaLB)	0	no_errors	MOC1	21	84	80	97	0	0	129	0	0	103	0	0
1	54480918	54480918	T	A	SNP	Gtf3c3	NM_001033194.2	mouse	genbank	58_37k	-1	provisional	missense	c.964	p.M322L	0	superfamily_Prenyl_trans	HMMPfam_TPR_1,HMMPfam_TPR_2,HMMSmart_TPR,superfamily_Prenyl_trans,superfamily_SSF48452	0	no_errors	MOC23	257	0	0	232	0	0	283	81	22.25	352	1	0.28
1	54485629	54485629	T	G	SNP	Gtf3c3	NM_001033194.2	mouse	genbank	58_37k	-1	provisional	missense	c.692	p.Q231P	0	HMMPfam_TPR_2,HMMSmart_TPR,superfamily_Prenyl_trans	HMMPfam_TPR_1,HMMPfam_TPR_2,HMMSmart_TPR,superfamily_Prenyl_trans,superfamily_SSF48452	0	no_errors	MOC23	456	0	0	436	0	0	187	434	69.89	728	3	0.41
1	54491004	54491004	T	C	SNP	Gtf3c3	NM_001033194.2	mouse	genbank	58_37k	-1	provisional	missense	c.293	p.E98G	0	NULL	HMMPfam_TPR_1,HMMPfam_TPR_2,HMMSmart_TPR,superfamily_Prenyl_trans,superfamily_SSF48452	0	no_errors	MOC23	193	0	0	184	3	1.6	77	201	72.3	270	1	0.37
1	55056503	55056503	T	C	SNP	Sf3b1	NM_031179.2	mouse	genbank	58_37k	-1	validated	missense	c.2464	p.R822G	0	superfamily_ARM repeat	HMMPfam_HEAT,HMMPfam_SF3b1,superfamily_ARM repeat	0	no_errors	MOC23	106	0	0	82	0	0	86	27	23.89	85	0	0
1	55294894	55294894	G	T	SNP	Mars2	NM_175439.3	mouse	genbank	58_37k	1	validated	missense	c.811	p.V271L	0	HMMPfam_tRNA-synt_1g,superfamily_Nucleotidylyl transferase	superfamily_Anticodon-binding domain of a subclass of class I aminoacyl-tRNA synthetases,HMMPfam_tRNA-synt_1g,superfamily_Nucleotidylyl transferase	0	no_errors	MOC22	70	0	0	63	23	26.74	133	0	0	116	0	0
1	55362555	55362555	A	T	SNP	Boll	ENSMUST00000087585	mouse	ensembl	58_37k	-1	known	missense	c.601	p.C201S	0	NULL	HMMPfam_RRM_1,HMMSmart_SM00360,superfamily_RNA-binding domain RBD	0	no_errors	MOC1	67	13	16.25	58	0	0	88	0	0	66	0	0
1	55397414	55397414	A	T	SNP	Boll	ENSMUST00000087585	mouse	ensembl	58_37k	-1	known	missense	c.419	p.M140K	0	NULL	HMMPfam_RRM_1,HMMSmart_SM00360,superfamily_RNA-binding domain RBD	0	no_errors	MOC22	37	0	0	23	25	52.08	47	1	2.08	51	0	0
1	55808307	55808307	A	T	SNP	Plcl1	ENSMUST00000042986	mouse	ensembl	58_37k	1	known	nonstop	c.3048	p.*1016C	0	NULL	HMMPfam_C2,HMMSmart_SM00239,HMMPfam_PI-PLC-X,HMMSmart_SM00148,HMMPfam_PI-PLC-Y,HMMSmart_SM00149,HMMPfam_PH,HMMSmart_SM00233,superfamily_C2 domain (Calcium/lipid-binding domain CaLB),HMMPfam_efhand_like,superfamily_PLC-like phosphodiesterases,superfamily_EF-hand,superfamily_PH domain-like	0	no_errors	MOC23	30	0	0	28	0	0	49	17	25.76	55	0	0
1	56694102	56694102	C	T	SNP	Hsfy2	NM_027661.2	mouse	genbank	58_37k	-1	validated	nonsense	c.119	p.W40*	0	NULL	HMMPfam_HSF_DNA-bind,HMMSmart_HSF,superfamily_SSF46785	0	no_errors	MOC1	11	62	84.93	83	0	0	121	0	0	109	0	0
1	58103993	58103993	A	T	SNP	Aox1	NM_009676.2	mouse	genbank	58_37k	1	validated	missense	c.212	p.N71I	0	HMMPfam_Fer2,superfamily_2Fe-2S ferredoxin-like	PatternScan_MOLYBDOPTERIN_EUK,HMMPfam_Ald_Xan_dh_C,superfamily_CO dehydrogenase molybdoprotein N-domain-like,HMMPfam_Fer2,superfamily_2Fe-2S ferredoxin-like,HMMPfam_FAD_binding_5,HMMPfam_Fer2_2,superfamily_CO dehydrogenase ISP C-domain like,HMMPfam_CO_deh_flav_C,superfamily_CO dehydrogenase flavoprotein C-terminal domain-like,PatternScan_2FE2S_FER_1,HMMPfam_Ald_Xan_dh_C2,superfamily_Molybdenum co…	0	no_errors	MOC22	167	0	0	90	50	35.71	221	0	0	213	0	0
1	58133011	58133011	A	T	SNP	Aox1	NM_009676.2	mouse	genbank	58_37k	1	validated	silent	c.2310	p.T770	0	HMMPfam_Ald_Xan_dh_C2,superfamily_Molybdenum cofactor-binding domain	PatternScan_MOLYBDOPTERIN_EUK,HMMPfam_Ald_Xan_dh_C,superfamily_CO dehydrogenase molybdoprotein N-domain-like,HMMPfam_Fer2,superfamily_2Fe-2S ferredoxin-like,HMMPfam_FAD_binding_5,HMMPfam_Fer2_2,superfamily_CO dehydrogenase ISP C-domain like,HMMPfam_CO_deh_flav_C,superfamily_CO dehydrogenase flavoprotein C-terminal domain-like,PatternScan_2FE2S_FER_1,HMMPfam_Ald_Xan_dh_C2,superfamily_Molybdenum co…	0	no_errors	MOC1	23	72	75.79	106	0	0	145	0	0	122	0	0
1	58257045	58257045	C	A	SNP	Aox3	NM_023617.2	mouse	genbank	58_37k	1	validated	missense	c.3986	p.P1329Q	0	superfamily_Molybdenum cofactor-binding domain	HMMPfam_Ald_Xan_dh_C,superfamily_CO dehydrogenase molybdoprotein N-domain-like,HMMPfam_Fer2,superfamily_2Fe-2S ferredoxin-like,HMMPfam_FAD_binding_5,HMMPfam_Fer2_2,superfamily_CO dehydrogenase ISP C-domain like,HMMPfam_CO_deh_flav_C,superfamily_CO dehydrogenase flavoprotein C-terminal domain-like,PatternScan_2FE2S_FER_1,HMMPfam_Ald_Xan_dh_C2,superfamily_Molybdenum cofactor-binding domain,superfam…	0	no_errors	MOC23	54	0	0	51	1	1.92	27	35	56.45	51	0	0
1	58257046	58257046	G	A	SNP	Aox3	NM_023617.2	mouse	genbank	58_37k	1	validated	silent	c.3987	p.P1329	0	superfamily_Molybdenum cofactor-binding domain	HMMPfam_Ald_Xan_dh_C,superfamily_CO dehydrogenase molybdoprotein N-domain-like,HMMPfam_Fer2,superfamily_2Fe-2S ferredoxin-like,HMMPfam_FAD_binding_5,HMMPfam_Fer2_2,superfamily_CO dehydrogenase ISP C-domain like,HMMPfam_CO_deh_flav_C,superfamily_CO dehydrogenase flavoprotein C-terminal domain-like,PatternScan_2FE2S_FER_1,HMMPfam_Ald_Xan_dh_C2,superfamily_Molybdenum cofactor-binding domain,superfam…	0	no_errors	MOC23	55	0	0	52	1	1.89	28	34	54.84	50	0	0
1	58290762	58290762	A	T	SNP	Aox4	NM_023631.2	mouse	genbank	58_37k	1	validated	nonsense	c.991	p.K331*	0	HMMPfam_FAD_binding_5,superfamily_FAD-binding_2	HMMPfam_Ald_Xan_dh_C,superfamily_Aldxan_dh_hamm,HMMPfam_Fer2,superfamily_Ferredoxin,HMMPfam_FAD_binding_5,HMMPfam_Fer2_2,superfamily_2Fe-2S_bind,HMMPfam_CO_deh_flav_C,superfamily_CO_deh_flav_C,PatternScan_2FE2S_FER_1,HMMPfam_Ald_Xan_dh_C2,superfamily_Ald_xan_DH_mo_bd,superfamily_FAD-binding_2	0	no_errors	MOC23	49	0	0	52	0	0	21	45	68.18	73	1	1.35
1	58403067	58403067	A	T	SNP	Aox3l1	NM_001008419.2	mouse	genbank	58_37k	1	validated	splice_site	c.3190-2	e28-2	0	0	0	0	no_errors	MOC1	9	56	86.15	55	0	0	69	0	0	61	0	0
1	58533284	58533284	T	A	SNP	Orc2l	NM_008765.2	mouse	genbank	58_37k	-1	provisional	missense	c.908	p.Q303L	0	HMMPfam_ORC2	HMMPfam_ORC2	0	no_errors	MOC23	175	0	0	127	0	0	39	110	73.83	151	2	1.31
1	58797869	58797869	G	C	SNP	Cflar	NM_207653.3	mouse	genbank	58_37k	1	validated	missense	c.778	p.D260H	0	HMMPfam_Peptidase_C14,HMMSmart_CASc,superfamily_SSF52129	HMMPfam_DED,HMMSmart_DED,superfamily_DEATH_like,HMMPfam_Peptidase_C14,HMMSmart_CASc,superfamily_SSF52129	0	no_errors	MOC22	141	0	0	51	71	58.2	174	3	1.69	156	1	0.64
1	58881050	58881050	A	T	SNP	Casp8	NM_001080126.1	mouse	genbank	58_37k	1	validated	missense	c.264	p.R88S	0	superfamily_DEATH domain	HMMPfam_DED,HMMSmart_SM00031,superfamily_DEATH domain,HMMPfam_Peptidase_C14,HMMSmart_SM00115,PatternScan_CASPASE_HIS,PatternScan_CASPASE_CYS,superfamily_Caspase-like	0	no_errors	MOC22	92	0	0	39	53	57.61	125	0	0	87	2	2.25
1	59060082	59060082	A	T	SNP	4930408G06Rik	ENSMUST00000054653	mouse	ensembl	58_37k	-1	known	missense	c.206	p.V69D	0	NULL	NULL	0	no_errors	MOC1	31	138	81.66	169	0	0	222	0	0	200	0	0
1	59224097	59224097	T	A	SNP	Als2	NM_028717.6	mouse	genbank	58_37k	-1	validated	missense	c.4847	p.H1616L	0	HMMPfam_VPS9,superfamily_VPS9 domain (Pfam 02204)	superfamily_DBL homology domain (DH-domain),PatternScan_RCC1_2,HMMPfam_VPS9,HMMPfam_MORN,HMMSmart_SM00698,superfamily_RCC1/BLIP-II,superfamily_VPS9 domain (Pfam 02204),superfamily_PH domain-like,superfamily_Histone H3 K4-specific methyltransferase SET7/9 N-terminal domain	0	no_errors	MOC1	67	13	16.25	52	0	0	75	0	0	79	0	0
1	59685032	59685032	A	G	SNP	Gm973	NM_001013771.2	mouse	genbank	58_37k	1	validated	missense	c.2107	p.K703E	0	NULL	NULL	0	no_errors	MOC1	51	6	10.53	50	0	0	69	0	0	48	0	0
1	59759755	59759755	G	C	SNP	Nop58	NM_018868.2	mouse	genbank	58_37k	1	validated	missense	c.598	p.D200H	0	HMMPfam_NOSIC,superfamily_SSF89124	HMMPfam_Nop,HMMPfam_NOP5NT,HMMPfam_NOSIC,superfamily_SSF89124	0	no_errors	MOC23	47	0	0	55	1	1.79	11	48	81.36	51	0	0
1	59761683	59761683	G	C	SNP	ENSMUSG00000089093	ENSMUST00000158468	mouse	ensembl	58_37k	1	known	rna	NULL	NULL	0	0	0	0	no_errors	MOC1	132	27	16.98	142	0	0	209	0	0	186	0	0
1	59925107	59925107	A	T	SNP	Bmpr2	NM_007561.3	mouse	genbank	58_37k	1	provisional	silent	c.2514	p.I838	0	NULL	HMMPfam_Activin_recp,PatternScan_PROTEIN_KINASE_ST,superfamily_Kinase_like,PatternScan_PROTEIN_KINASE_ATP,HMMPfam_Pkinase,superfamily_SSF57302	0	no_errors	MOC22	68	0	0	58	27	31.76	127	0	0	86	0	0
1	60009851	60009851	A	T	SNP	Fam117b	NM_001037725.2	mouse	genbank	58_37k	1	provisional	missense	c.814	p.T272S	0	NULL	NULL	0	no_errors	MOC23	93	0	0	69	1	1.43	29	62	68.13	87	0	0
1	60204315	60204315	A	T	SNP	Carf	NM_139150.4	mouse	genbank	58_37k	1	provisional	silent	c.1584	p.T528	0	NULL	NULL	0	no_errors	MOC22	33	0	0	15	8	34.78	26	0	0	21	0	0
1	60263206	60263206	A	T	SNP	Nbeal1	ENSMUST00000035569	mouse	ensembl	58_37k	1	known	nonsense	c.544	p.R182*	0	superfamily_ARM repeat	superfamily_ARM repeat	0	no_stop_codon	MOC22	80	0	0	12	37	75.51	96	0	0	69	0	0
1	60346817	60346817	A	T	SNP	Nbeal1	ENSMUST00000035550	mouse	ensembl	58_37k	1	known	silent	c.135	p.P45	0	HMMPfam_Beach,superfamily_Beige_BEACH,superfamily_WD40_like	HMMPfam_Beach,superfamily_Beige_BEACH,HMMSmart_WD40,superfamily_WD40_like,HMMPfam_WD40	0	no_errors	MOC22	105	0	0	57	21	26.92	126	0	0	130	0	0
1	62207708	62207708	A	C	SNP	Pard3b	NM_001081050.2	mouse	genbank	58_37k	1	validated	silent	c.834	p.A278	0	HMMSmart_SM00228,superfamily_PDZ domain-like	HMMPfam_PDZ,HMMSmart_SM00228,superfamily_PDZ domain-like	0	no_errors	MOC23	116	0	0	103	2	1.9	35	89	71.77	124	0	0
1	63619691	63619691	A	T	SNP	Adam23	ENSMUST00000114103	mouse	ensembl	58_37k	1	known	silent	c.2469	p.T823	0	NULL	HMMPfam_Reprolysin,HMMPfam_Disintegrin,HMMSmart_DISIN,superfamily_Disintegrin,HMMPfam_Pep_M12B_propep,HMMSmart_EGF,HMMPfam_ADAM_CR,HMMSmart_ACR,PatternScan_EGF_1,HMMPfam_EGF_2,superfamily_SSF55486	0	no_errors	MOC23	12	0	0	11	0	0	4	15	78.95	15	0	0
1	63802771	63802771	A	T	SNP	4933402D24Rik	XM_129823.4	mouse	genbank	58_37k	-1	model	missense	c.400	p.C134S	0	NULL	NULL	0	no_errors	MOC22	110	0	0	41	54	56.84	150	0	0	133	1	0.75
1	65119827	65119827	T	A	SNP	Crygc	NM_001082573.1	mouse	genbank	58_37k	-1	provisional	missense	c.161	p.H54L	0	HMMPfam_Crystall,HMMSmart_XTALbg,superfamily_G_crystallin_SF	HMMPfam_Crystall,HMMSmart_XTALbg,superfamily_G_crystallin_SF	0	no_errors	MOC23	54	0	0	71	0	0	31	65	67.71	88	0	0
1	65149722	65149722	A	T	SNP	Cryga	NM_007774.3	mouse	genbank	58_37k	-1	reviewed	missense	c.85	p.Y29N	0	HMMPfam_Crystall,HMMSmart_XTALbg,superfamily_G_crystallin_SF	HMMPfam_Crystall,HMMSmart_XTALbg,superfamily_G_crystallin_SF	0	no_errors	MOC22	91	0	0	69	36	34.29	148	0	0	144	0	0
1	65315292	65315292	A	C	SNP	Pikfyve	NM_011086.2	mouse	genbank	58_37k	1	validated	missense	c.5317	p.K1773Q	0	HMMSmart_SM00330,superfamily_SAICAR synthase-like	HMMPfam_FYVE,HMMSmart_SM00064,HMMPfam_DEP,HMMSmart_SM00049,HMMPfam_Cpn60_TCP1,HMMPfam_PIP5K,superfamily_FYVE/PHD zinc finger,HMMSmart_SM00330,superfamily_Winged helix DNA-binding domain,superfamily_GroEL apical domain-like,superfamily_GroEL-intermediate domain like,superfamily_SAICAR synthase-like	0	no_errors	MOC23	150	0	0	126	0	0	64	144	69.23	200	1	0.5
1	66427154	66427154	T	A	SNP	Mtap2	NM_001039934.1	mouse	genbank	58_37k	1	validated	silent	c.69	p.A23	0	NULL	HMMPfam_Tubulin-binding,PatternScan_TAU_MAP,HMMPfam_RII_binding_1	0	no_errors	MOC22	37	0	0	28	18	39.13	66	0	0	59	0	0
1	66448043	66448043	A	T	SNP	Mtap2	ENSMUST00000141148	mouse	ensembl	58_37k	1	known	missense	c.209	p.H70L	0	NULL	HMMPfam_RII_binding_1	0	pseudogene:no_stop_codon:bad_bp_length_for_coding_region	MOC22	111	0	0	64	33	34.02	148	1	0.65	145	0	0
1	66520058	66520058	C	A	SNP	Unc80	ENSMUST00000114009	mouse	ensembl	58_37k	1	known	silent	c.552	p.T184	0	NULL	NULL	0	no_errors	MOC22	65	0	0	38	21	35	78	0	0	85	0	0
1	66715726	66715726	T	A	SNP	Unc80	ENSMUST00000114009	mouse	ensembl	58_37k	1	known	missense	c.7538	p.M2513K	0	NULL	NULL	0	no_errors	MOC22	64	0	0	20	31	60.78	55	0	0	60	0	0
1	66721534	66721534	G	C	SNP	Unc80	ENSMUST00000050986	mouse	ensembl	58_37k	1	known	silent	c.2919	p.R973	0	NULL	NULL	0	no_errors	MOC23	61	0	0	51	1	1.92	64	20	23.81	79	0	0
1	67186442	67186442	T	A	SNP	Cps1	NM_001080809.1	mouse	genbank	58_37k	1	provisional	splice_site	c.236+2	e2+2	0	0	0	0	no_errors	MOC23	64	0	0	59	0	0	66	19	22.35	89	0	0
1	67198939	67198939	A	T	SNP	Cps1	NM_001080809.1	mouse	genbank	58_37k	1	provisional	silent	c.705	p.L235	0	HMMPfam_GATase,superfamily_Class I glutamine amidotransferase-like	HMMPfam_GATase,HMMPfam_CPSase_sm_chain,superfamily_Carbamoyl phosphate synthetase small subunit N-terminal domain,HMMPfam_CPSase_L_D2,PatternScan_CPSASE_1,PatternScan_CPSASE_2,HMMPfam_CPSase_L_D3,superfamily_Carbamoyl phosphate synthetase large subunit connection domain,HMMPfam_CPSase_L_chain,HMMPfam_MGS,superfamily_PreATP-grasp domain,superfamily_Class I glutamine amidotransferase-like,superfami…	0	no_errors	MOC22	98	0	0	52	21	28.77	114	0	0	105	0	0
1	68086817	68086817	T	A	SNP	Erbb4	ENSMUST00000119142	mouse	ensembl	58_37k	-1	known	missense	c.3725	p.Y1242F	0	NULL	HMMPfam_Recep_L_domain,HMMPfam_Pkinase_Tyr,HMMSmart_TyrKc,HMMPfam_YLP,HMMPfam_Furin-like,HMMSmart_FU,PatternScan_PROTEIN_KINASE_TYR,superfamily_Grow_fac_recept,superfamily_Kinase_like,PatternScan_PROTEIN_KINASE_ATP,superfamily_SSF52058	0	no_errors	MOC1	14	75	83.33	92	0	0	132	0	0	111	0	0
1	68125123	68125123	A	T	SNP	Erbb4	ENSMUST00000119142	mouse	ensembl	58_37k	-1	known	missense	c.2706	p.D902E	0	HMMPfam_Pkinase_Tyr,HMMSmart_TyrKc,superfamily_Kinase_like	HMMPfam_Recep_L_domain,HMMPfam_Pkinase_Tyr,HMMSmart_TyrKc,HMMPfam_YLP,HMMPfam_Furin-like,HMMSmart_FU,PatternScan_PROTEIN_KINASE_TYR,superfamily_Grow_fac_recept,superfamily_Kinase_like,PatternScan_PROTEIN_KINASE_ATP,superfamily_SSF52058	0	no_errors	MOC23	92	0	0	80	0	0	21	78	78.79	112	1	0.88
1	71368231	71368231	T	C	SNP	Abca12	ENSMUST00000087268	mouse	ensembl	58_37k	-1	known	missense	c.1482	p.I494M	0	NULL	HMMPfam_ABC_tran,HMMSmart_SM00382,PatternScan_ABC_TRANSPORTER_1,superfamily_P-loop containing nucleoside triphosphate hydrolases	0	no_stop_codon	MOC22	63	0	0	41	19	31.15	78	0	0	58	0	0
1	71540180	71540180	T	C	SNP	LOC629101	XR_034440.1	mouse	genbank	58_37k	-1	model	rna	NULL	NULL	0	0	0	0	pseudogene	MOC23	11	0	0	18	0	0	16	5	23.81	14	0	0
1	71633472	71633472	T	A	SNP	Fn1	NM_010233.1	mouse	genbank	58_37k	-1	provisional	missense	c.7294	p.S2432C	0	NULL	HMMPfam_fn1,HMMSmart_SM00058,PatternScan_FN1_1,HMMPfam_fn2,HMMSmart_SM00059,PatternScan_FN2_1,HMMPfam_fn3,HMMSmart_SM00060,superfamily_Fibronectin type III,PatternScan_EGF_1,superfamily_Kringle-like,PatternScan_ALDEHYDE_DEHYDR_GLU,superfamily_Fibronectin type I module	0	no_errors	MOC22	85	0	0	52	26	33.33	100	0	0	87	0	0
1	71645961	71645961	G	A	SNP	Fn1	NM_010233.1	mouse	genbank	58_37k	-1	provisional	silent	c.5982	p.D1994	0	HMMPfam_fn3,HMMSmart_SM00060,superfamily_Fibronectin type III	HMMPfam_fn1,HMMSmart_SM00058,PatternScan_FN1_1,HMMPfam_fn2,HMMSmart_SM00059,PatternScan_FN2_1,HMMPfam_fn3,HMMSmart_SM00060,superfamily_Fibronectin type III,PatternScan_EGF_1,superfamily_Kringle-like,PatternScan_ALDEHYDE_DEHYDR_GLU,superfamily_Fibronectin type I module	0	no_errors	MOC23	49	0	0	47	0	0	56	18	24.32	54	0	0
1	71650334	71650334	T	G	SNP	Fn1	NM_010233.1	mouse	genbank	58_37k	-1	provisional	silent	c.5331	p.A1777	0	HMMPfam_fn3,HMMSmart_SM00060,superfamily_Fibronectin type III	HMMPfam_fn1,HMMSmart_SM00058,PatternScan_FN1_1,HMMPfam_fn2,HMMSmart_SM00059,PatternScan_FN2_1,HMMPfam_fn3,HMMSmart_SM00060,superfamily_Fibronectin type III,PatternScan_EGF_1,superfamily_Kringle-like,PatternScan_ALDEHYDE_DEHYDR_GLU,superfamily_Fibronectin type I module	0	no_errors	MOC1	16	64	80	81	0	0	132	0	0	108	0	0
1	71652567	71652567	T	A	SNP	Fn1	NM_010233.1	mouse	genbank	58_37k	-1	provisional	missense	c.4939	p.S1647C	0	HMMPfam_fn3,HMMSmart_SM00060,superfamily_Fibronectin type III	HMMPfam_fn1,HMMSmart_SM00058,PatternScan_FN1_1,HMMPfam_fn2,HMMSmart_SM00059,PatternScan_FN2_1,HMMPfam_fn3,HMMSmart_SM00060,superfamily_Fibronectin type III,PatternScan_EGF_1,superfamily_Kringle-like,PatternScan_ALDEHYDE_DEHYDR_GLU,superfamily_Fibronectin type I module	0	no_errors	MOC22	58	0	0	43	16	27.12	97	0	0	93	0	0
1	71676053	71676053	G	C	SNP	Fn1	NM_010233.1	mouse	genbank	58_37k	-1	provisional	silent	c.2133	p.T711	0	NULL	HMMPfam_fn1,HMMSmart_SM00058,PatternScan_FN1_1,HMMPfam_fn2,HMMSmart_SM00059,PatternScan_FN2_1,HMMPfam_fn3,HMMSmart_SM00060,superfamily_Fibronectin type III,PatternScan_EGF_1,superfamily_Kringle-like,PatternScan_ALDEHYDE_DEHYDR_GLU,superfamily_Fibronectin type I module	0	no_errors	MOC22	63	0	0	32	28	46.67	95	0	0	77	0	0
1	71678703	71678703	T	A	SNP	Fn1	NM_010233.1	mouse	genbank	58_37k	-1	provisional	missense	c.1853	p.E618V	0	HMMPfam_fn3,HMMSmart_SM00060,superfamily_Fibronectin type III	HMMPfam_fn1,HMMSmart_SM00058,PatternScan_FN1_1,HMMPfam_fn2,HMMSmart_SM00059,PatternScan_FN2_1,HMMPfam_fn3,HMMSmart_SM00060,superfamily_Fibronectin type III,PatternScan_EGF_1,superfamily_Kringle-like,PatternScan_ALDEHYDE_DEHYDR_GLU,superfamily_Fibronectin type I module	0	no_errors	MOC23	38	0	0	39	0	0	8	25	75.76	44	0	0
1	71689620	71689620	G	T	SNP	Fn1	NM_010233.1	mouse	genbank	58_37k	-1	provisional	missense	c.950	p.S317Y	0	HMMPfam_fn1,HMMSmart_SM00058,PatternScan_FN1_1,superfamily_Fibronectin type I module	HMMPfam_fn1,HMMSmart_SM00058,PatternScan_FN1_1,HMMPfam_fn2,HMMSmart_SM00059,PatternScan_FN2_1,HMMPfam_fn3,HMMSmart_SM00060,superfamily_Fibronectin type III,PatternScan_EGF_1,superfamily_Kringle-like,PatternScan_ALDEHYDE_DEHYDR_GLU,superfamily_Fibronectin type I module	0	no_errors	MOC22	95	0	0	63	27	30	141	0	0	151	0	0
1	71698143	71698143	T	A	SNP	Fn1	NM_010233.1	mouse	genbank	58_37k	-1	provisional	missense	c.232	p.T78S	0	HMMPfam_fn1,HMMSmart_SM00058,PatternScan_FN1_1,PatternScan_EGF_1,superfamily_Fibronectin type I module	HMMPfam_fn1,HMMSmart_SM00058,PatternScan_FN1_1,HMMPfam_fn2,HMMSmart_SM00059,PatternScan_FN2_1,HMMPfam_fn3,HMMSmart_SM00060,superfamily_Fibronectin type III,PatternScan_EGF_1,superfamily_Kringle-like,PatternScan_ALDEHYDE_DEHYDR_GLU,superfamily_Fibronectin type I module	0	no_errors	MOC1	22	95	81.2	94	0	0	158	0	0	135	0	0
1	71761461	71761461	T	A	SNP	LOC383528	XR_033954.1	mouse	genbank	58_37k	-1	model	rna	NULL	NULL	0	0	0	0	pseudogene	MOC22	29	0	0	24	17	41.46	36	0	0	37	0	0
1	72657930	72657930	A	T	SNP	Smarcal1	NM_018817.2	mouse	genbank	58_37k	1	validated	missense	c.1649	p.Y550F	0	HMMSmart_SM00487,superfamily_P-loop containing nucleoside triphosphate hydrolases	HMMPfam_SNF2_N,HMMPfam_Helicase_C,HMMSmart_SM00490,HMMPfam_HARP,HMMSmart_SM00487,superfamily_P-loop containing nucleoside triphosphate hydrolases	0	no_errors	MOC23	192	0	0	175	0	0	61	251	80.45	208	0	0
1	72736808	72736808	T	A	SNP	Ankar	NM_176980.4	mouse	genbank	58_37k	-1	validated	missense	c.751	p.T251S	0	superfamily_ANK	HMMPfam_Arm,HMMSmart_ARM,HMMPfam_Ank,HMMSmart_ANK,superfamily_ANK,superfamily_ARM-type_fold	0	no_errors	MOC23	80	0	0	60	0	0	67	27	28.72	63	0	0
1	72745589	72745589	T	A	SNP	Ankar	NM_176980.4	mouse	genbank	58_37k	-1	validated	nonsense	c.7	p.R3*	0	NULL	HMMPfam_Arm,HMMSmart_ARM,HMMPfam_Ank,HMMSmart_ANK,superfamily_ANK,superfamily_ARM-type_fold	0	no_errors	MOC1	13	66	83.54	67	0	0	118	0	0	80	0	0
1	74441592	74441592	A	G	SNP	Ctdsp1	NM_153088.2	mouse	genbank	58_37k	1	validated	missense	c.653	p.N218S	0	HMMPfam_NIF,HMMSmart_SM00577,superfamily_HAD-like	HMMPfam_NIF,HMMSmart_SM00577,superfamily_HAD-like	0	no_errors	MOC1	22	106	82.81	134	0	0	185	0	0	172	0	0
1	74461684	74461684	T	A	SNP	Vil1	NM_009509.2	mouse	genbank	58_37k	1	validated	missense	c.31	p.S11T	0	NULL	HMMPfam_VHP,superfamily_VHP,HMMSmart_GEL,HMMPfam_Gelsolin,superfamily_SSF55753,superfamily_SSF82754	0	no_errors	MOC1	180	34	15.81	178	0	0	226	0	0	236	0	0
1	74470519	74470519	T	G	SNP	Vil1	NM_009509.2	mouse	genbank	58_37k	1	validated	missense	c.1286	p.L429R	0	HMMSmart_GEL,HMMPfam_Gelsolin,superfamily_SSF55753,superfamily_SSF82754	HMMPfam_VHP,superfamily_VHP,HMMSmart_GEL,HMMPfam_Gelsolin,superfamily_SSF55753,superfamily_SSF82754	0	no_errors	MOC23	190	0	0	185	1	0.54	186	74	28.46	257	0	0
1	74542251	74542251	T	A	SNP	Usp37	NM_176972.4	mouse	genbank	58_37k	-1	validated	missense	c.109	p.S37C	0	NULL	HMMPfam_UCH,HMMPfam_UIM,HMMSmart_UIM,PatternScan_UCH_2_1,PatternScan_UCH_2_2,superfamily_SSF54001	0	no_errors	MOC22	104	0	0	37	54	59.34	120	0	0	109	0	0
1	74638600	74638600	A	T	SNP	Bcs1l	NM_025784.4	mouse	genbank	58_37k	1	provisional	missense	c.1212	p.K404N	0	NULL	HMMSmart_AAA,HMMPfam_AAA,PatternScan_AAA,HMMPfam_BCS1_N,superfamily_SSF52540	0	no_errors	MOC23	76	0	0	74	0	0	27	86	76.11	86	0	0
1	74669933	74669933	G	T	SNP	Stk36	NM_175031.3	mouse	genbank	58_37k	1	validated	silent	c.1635	p.L545	0	superfamily_ARM repeat	HMMPfam_HEAT,HMMSmart_SM00219,HMMSmart_SM00220,PatternScan_PROTEIN_KINASE_ST,superfamily_Protein kinase-like (PK-like),superfamily_ARM repeat,PatternScan_PROTEIN_KINASE_ATP,HMMPfam_Pkinase	0	no_errors	MOC1	129	20	13.42	130	0	0	166	0	0	193	0	0
1	74744153	74744153	G	T	SNP	Ttll4	NM_001014974.1	mouse	genbank	58_37k	1	provisional	missense	c.3462	p.Q1154H	0	NULL	HMMPfam_TTL,superfamily_SSF56059	0	no_errors	MOC23	78	1	1.27	70	0	0	25	42	61.76	66	1	1.49
1	74783871	74783871	T	A	SNP	Cyp27a1	NM_024264.4	mouse	genbank	58_37k	1	provisional	missense	c.1391	p.L464Q	0	HMMPfam_p450,superfamily_Cytochrome_P450	HMMPfam_p450,superfamily_Cytochrome_P450,PatternScan_CYTOCHROME_P450	0	no_errors	MOC22	203	0	0	107	48	30.77	263	0	0	238	0	0
1	74850105	74850105	A	T	SNP	Wnt10a	NM_009518.2	mouse	genbank	58_37k	1	validated	missense	c.1165	p.S389C	0	HMMPfam_wnt,HMMSmart_WNT1	HMMPfam_wnt,HMMSmart_WNT1,PatternScan_WNT1	0	no_errors	MOC23	19	0	0	13	0	0	5	21	80.77	23	0	0
1	74902398	74902398	T	G	SNP	Cdk5r2	NM_009872.3	mouse	genbank	58_37k	1	validated	missense	c.727	p.C243G	0	HMMPfam_CDK5_activator,superfamily_Cyclin_like	HMMPfam_CDK5_activator,superfamily_Cyclin_like	0	no_errors	MOC22	110	0	0	79	40	33.61	147	2	1.34	147	1	0.68
1	74928961	74928961	A	T	SNP	Fev	NM_153111.2	mouse	genbank	58_37k	-1	validated	missense	c.403	p.C135S	0	superfamily_Winged helix DNA-binding domain	HMMPfam_Ets,HMMSmart_SM00413,PatternScan_ETS_DOMAIN_1,PatternScan_ETS_DOMAIN_2,superfamily_Winged helix DNA-binding domain	0	no_errors	MOC23	19	0	0	9	0	0	10	16	61.54	19	0	0
1	74957638	74957638	C	T	SNP	Ccdc108	NM_001039495.1	mouse	genbank	58_37k	-1	validated	silent	c.3525	p.K1175	0	superfamily_PapD-like	superfamily_PapD-like	0	no_errors	MOC22	181	0	0	50	96	65.75	229	1	0.43	214	1	0.47
1	75126029	75126029	C	A	SNP	Slc23a3	NM_194333.3	mouse	genbank	58_37k	-1	validated	silent	c.1119	p.G373	0	HMMPfam_Xan_ur_permease	HMMPfam_Xan_ur_permease	0	no_errors	MOC22	168	1	0.59	87	51	36.96	215	1	0.46	205	0	0
1	75129287	75129287	C	T	SNP	Slc23a3	NM_194333.3	mouse	genbank	58_37k	-1	validated	missense	c.572	p.R191H	0	HMMPfam_Xan_ur_permease	HMMPfam_Xan_ur_permease	0	no_errors	MOC22	32	0	0	15	21	58.33	57	0	0	61	0	0
1	75129288	75129288	G	T	SNP	Slc23a3	NM_194333.3	mouse	genbank	58_37k	-1	validated	missense	c.571	p.R191S	0	HMMPfam_Xan_ur_permease	HMMPfam_Xan_ur_permease	0	no_errors	MOC22	32	0	0	15	22	59.46	57	0	0	61	0	0
1	75311738	75311738	C	T	SNP	Dnpep	NM_016878.4	mouse	genbank	58_37k	-1	validated	silent	c.705	p.E235	0	HMMPfam_Peptidase_M18,superfamily_SSF53187	HMMPfam_Peptidase_M18,superfamily_SSF53187	0	no_errors	MOC23	138	0	0	141	0	0	145	53	26.77	198	0	0
1	75357203	75357203	T	C	SNP	Des	NM_010043.1	mouse	genbank	58_37k	1	provisional	missense	c.211	p.S71P	0	HMMPfam_Filament_head	HMMPfam_Filament_head,superfamily_Prefoldin,HMMPfam_Filament,PatternScan_IF	0	no_errors	MOC22	51	0	0	18	29	60.42	54	0	0	62	1	1.56
1	75413616	75413616	A	T	SNP	Speg	NM_007463.4	mouse	genbank	58_37k	1	validated	splice_site	c.5043-2	e23-2	0	0	0	0	no_errors	MOC23	62	0	0	50	0	0	58	12	17.14	62	0	0
1	75419587	75419587	C	A	SNP	Speg	NM_007463.4	mouse	genbank	58_37k	1	validated	missense	c.7102	p.R2368S	0	NULL	HMMSmart_SM00219,HMMSmart_SM00220,HMMSmart_SM00408,HMMSmart_SM00409,HMMPfam_fn3,HMMSmart_SM00060,PatternScan_PROTEIN_KINASE_ST,superfamily_Fibronectin type III,superfamily_Protein kinase-like (PK-like),HMMPfam_I-set,PatternScan_PROTEIN_KINASE_ATP,HMMPfam_Pkinase,superfamily_Immunoglobulin	0	no_errors	MOC23	34	0	0	29	0	0	14	27	65.85	24	0	0
1	75423716	75423716	T	A	SNP	Speg	NM_007463.4	mouse	genbank	58_37k	1	validated	silent	c.7965	p.A2655	0	HMMSmart_SM00408,HMMSmart_SM00409,HMMPfam_I-set,superfamily_Immunoglobulin	HMMSmart_SM00219,HMMSmart_SM00220,HMMSmart_SM00408,HMMSmart_SM00409,HMMPfam_fn3,HMMSmart_SM00060,PatternScan_PROTEIN_KINASE_ST,superfamily_Fibronectin type III,superfamily_Protein kinase-like (PK-like),HMMPfam_I-set,PatternScan_PROTEIN_KINASE_ATP,HMMPfam_Pkinase,superfamily_Immunoglobulin	0	no_errors	MOC23	130	0	0	131	1	0.76	169	54	24.22	162	0	0
1	75438796	75438796	A	G	SNP	Gmppa	NM_133708.3	mouse	genbank	58_37k	1	validated	missense	c.937	p.I313V	0	HMMPfam_Hexapep,superfamily_Trimer_LpxA_like,PatternScan_HEXAPEP_TRANSFERASES	HMMPfam_Hexapep,HMMPfam_NTP_transferase,superfamily_Trimer_LpxA_like,PatternScan_HEXAPEP_TRANSFERASES,superfamily_SSF53448	0	no_errors	MOC23	197	0	0	182	3	1.62	225	66	22.68	274	0	0
1	75447767	75447767	A	T	SNP	Accn4	NM_183022.3	mouse	genbank	58_37k	1	validated	missense	c.361	p.N121Y	0	HMMPfam_ASC	HMMPfam_ASC,PatternScan_ASC	0	no_errors	MOC1	16	70	81.4	70	0	0	138	0	0	146	0	0
1	75447777	75447777	G	T	SNP	Accn4	NM_183022.3	mouse	genbank	58_37k	1	validated	missense	c.371	p.R124L	0	HMMPfam_ASC	HMMPfam_ASC,PatternScan_ASC	0	no_errors	MOC22	91	0	0	34	46	57.5	144	1	0.69	152	0	0
1	75469469	75469469	T	C	SNP	Accn4	NM_183022.3	mouse	genbank	58_37k	1	validated	silent	c.1302	p.Y434	0	HMMPfam_ASC	HMMPfam_ASC,PatternScan_ASC	0	no_errors	MOC23	257	0	0	216	1	0.46	92	230	71.43	300	3	0.99
1	75484573	75484573	A	T	SNP	Obsl1	ENSMUST00000113567	mouse	ensembl	58_37k	-1	known	missense	c.4778	p.L1593Q	0	HMMSmart_SM00408,HMMSmart_SM00409,HMMPfam_I-set,superfamily_Immunoglobulin	HMMSmart_SM00408,HMMSmart_SM00409,HMMPfam_fn3,superfamily_Fibronectin type III,HMMPfam_I-set,HMMPfam_ig,superfamily_Immunoglobulin	0	no_errors	MOC23	28	0	0	19	0	0	6	34	85	38	0	0
1	75485218	75485218	T	A	SNP	Obsl1	ENSMUST00000113567	mouse	ensembl	58_37k	-1	known	silent	c.4659	p.T1553	0	HMMSmart_SM00408,HMMSmart_SM00409,HMMPfam_I-set,superfamily_Immunoglobulin	HMMSmart_SM00408,HMMSmart_SM00409,HMMPfam_fn3,superfamily_Fibronectin type III,HMMPfam_I-set,HMMPfam_ig,superfamily_Immunoglobulin	0	no_errors	MOC23	185	0	0	154	0	0	71	169	70.42	243	0	0
1	75487598	75487598	T	A	SNP	Obsl1	ENSMUST00000113567	mouse	ensembl	58_37k	-1	known	missense	c.4106	p.E1369V	0	HMMSmart_SM00408,HMMSmart_SM00409,HMMPfam_I-set,superfamily_Immunoglobulin	HMMSmart_SM00408,HMMSmart_SM00409,HMMPfam_fn3,superfamily_Fibronectin type III,HMMPfam_I-set,HMMPfam_ig,superfamily_Immunoglobulin	0	no_errors	MOC23	178	0	0	157	1	0.63	57	151	71.9	218	3	1.35
1	75488899	75488899	A	T	SNP	Obsl1	ENSMUST00000064469	mouse	ensembl	58_37k	-1	known	missense	c.2234	p.V745E	0	superfamily_Immunoglobulin	HMMSmart_SM00408,HMMSmart_SM00409,superfamily_Fibronectin type III,HMMPfam_I-set,HMMPfam_ig,superfamily_Immunoglobulin	0	no_errors	MOC1	9	53	85.48	41	0	0	61	0	0	62	0	0
1	75521367	75521367	A	C	SNP	Stk11ip	NM_027886.3	mouse	genbank	58_37k	1	validated	silent	c.171	p.T57	0	NULL	superfamily_SSF52075	0	no_errors	MOC22	148	0	0	39	67	63.21	207	0	0	223	1	0.45
1	77503568	77503568	G	T	SNP	Epha4	NM_007936.3	mouse	genbank	58_37k	-1	validated	nonsense	c.378	p.Y126*	0	HMMPfam_Ephrin_lbd,HMMSmart_EPH_lbd,superfamily_Gal_bind_like	HMMPfam_Ephrin_lbd,HMMSmart_EPH_lbd,HMMPfam_Pkinase_Tyr,HMMSmart_TyrKc,PatternScan_RECEPTOR_TYR_KIN_V_1,PatternScan_RECEPTOR_TYR_KIN_V_2,HMMSmart_SAM,HMMPfam_fn3,HMMSmart_FN3,PatternScan_PROTEIN_KINASE_TYR,superfamily_FN_III-like,superfamily_Gal_bind_like,superfamily_SAM_homology,superfamily_Kinase_like,HMMPfam_SAM_2,PatternScan_PROTEIN_KINASE_ATP	0	no_errors	MOC23	227	0	0	214	0	0	94	236	71.3	337	0	0
1	78476592	78476592	T	A	SNP	Farsb	NM_011811.3	mouse	genbank	58_37k	-1	provisional	missense	c.209	p.N70I	0	superfamily_Putativ_DNA_bind	HMMPfam_B3_4,superfamily_B3_4,HMMPfam_B5,superfamily_Putativ_DNA_bind,superfamily_SSF55681	0	no_errors	MOC23	115	0	0	101	0	0	105	41	28.08	137	0	0
1	78525821	78525821	A	T	SNP	Mogat1	NM_026713.3	mouse	genbank	58_37k	1	validated	missense	c.847	p.T283S	0	HMMPfam_DAGAT	HMMPfam_DAGAT	0	no_errors	MOC22	95	0	0	30	89	74.79	128	0	0	95	1	1.04
1	79432873	79432873	T	A	SNP	Scg2	NM_009129.2	mouse	genbank	58_37k	-1	validated	missense	c.707	p.Y236F	0	HMMPfam_Granin	HMMPfam_Granin,PatternScan_GRANINS_1	0	no_errors	MOC23	249	0	0	233	0	0	247	83	25.15	387	0	0
1	79919406	79919406	A	G	SNP	EG433326	XM_484885.5	mouse	genbank	58_37k	-1	model	missense	c.596	p.M199T	0	superfamily_Mitochondrial carrier,HMMPfam_Mito_carr	superfamily_Mitochondrial carrier,HMMPfam_Mito_carr	0	pseudogene	MOC22	100	0	0	71	31	30.39	149	0	0	113	1	0.88
1	79954248	79954248	A	T	SNP	LOC665064	XR_030825.1	mouse	genbank	58_37k	1	model	rna	NULL	NULL	0	0	0	0	pseudogene	MOC23	52	0	0	41	0	0	17	40	70.18	55	0	0
1	79954558	79954558	T	A	SNP	LOC665064	XR_030825.1	mouse	genbank	58_37k	1	model	rna	NULL	NULL	0	0	0	0	pseudogene	MOC1	37	185	83.33	207	0	0	321	0	0	343	0	0
1	80209619	80209619	G	T	SNP	Fam124b	NM_173425.3	mouse	genbank	58_37k	-1	validated	missense	c.621	p.F207L	0	NULL	NULL	0	no_errors	MOC23	36	0	0	41	0	0	11	32	74.42	44	0	0
1	80209841	80209841	A	T	SNP	Fam124b	NM_173425.3	mouse	genbank	58_37k	-1	validated	nonsense	c.399	p.C133*	0	NULL	NULL	0	no_errors	MOC23	125	0	0	120	0	0	39	108	72.97	155	1	0.64
1	80380293	80380293	G	C	SNP	EG620899	XM_885282.2	mouse	genbank	58_37k	-1	model	missense	c.1489	p.H497D	0	HMMPfam_GLE1	HMMPfam_GLE1	0	pseudogene	MOC23	49	0	0	69	0	0	22	65	74.71	92	0	0
1	80502253	80502253	T	A	SNP	Dock10	ENSMUST00000097681	mouse	ensembl	58_37k	-1	known	missense	c.6155	p.E2052V	0	HMMPfam_Ded_cyto	HMMPfam_PH,HMMSmart_SM00233,HMMPfam_Ded_cyto,superfamily_PH domain-like	0	no_errors	MOC23	96	0	0	116	0	0	99	39	28.06	143	0	0
1	80570770	80570770	A	T	SNP	Dock10	ENSMUST00000097681	mouse	ensembl	58_37k	-1	known	missense	c.1961	p.V654E	0	NULL	HMMPfam_PH,HMMSmart_SM00233,HMMPfam_Ded_cyto,superfamily_PH domain-like	0	no_errors	MOC1	17	44	72.13	50	0	0	37	1	2.63	68	0	0
1	80589808	80589808	T	A	SNP	Dock10	ENSMUST00000097681	mouse	ensembl	58_37k	-1	known	missense	c.943	p.N315Y	0	NULL	HMMPfam_PH,HMMSmart_SM00233,HMMPfam_Ded_cyto,superfamily_PH domain-like	0	no_errors	MOC23	128	0	0	140	0	0	139	39	21.91	193	0	0
1	81738889	81738889	A	T	SNP	LOC433328	XR_031195.1	mouse	genbank	58_37k	-1	model	rna	NULL	NULL	0	0	0	0	pseudogene	MOC1	82	9	9.89	101	0	0	134	0	0	107	0	0
1	81793885	81793885	A	T	SNP	EG665145	XR_001697.2	mouse	genbank	58_37k	1	model	rna	NULL	NULL	0	0	0	0	pseudogene	MOC23	26	0	0	38	0	0	27	8	22.86	27	0	0
1	81794002	81794002	T	A	SNP	EG665145	XR_001697.2	mouse	genbank	58_37k	1	model	rna	NULL	NULL	0	0	0	0	pseudogene	MOC22	30	0	0	7	25	78.12	39	0	0	49	0	0
1	82286036	82286036	T	A	SNP	Irs1	NM_010570.4	mouse	genbank	58_37k	-1	validated	missense	c.1033	p.S345C	0	NULL	HMMPfam_PH,HMMSmart_PH,HMMPfam_IRS,HMMSmart_PTBI,superfamily_SSF50729	0	no_errors	MOC1	37	156	80.83	196	0	0	278	0	0	302	0	0
1	82535681	82535681	C	A	SNP	Col4a4	NM_007735.2	mouse	genbank	58_37k	-1	validated	silent	c.390	p.V130	0	HMMPfam_Collagen	HMMPfam_C4,HMMSmart_SM00111,HMMPfam_Collagen,superfamily_C-type lectin-like	0	no_errors	MOC23	129	0	0	127	0	0	40	119	74.84	174	0	0
1	82536562	82536562	A	T	SNP	Col4a4	NM_007735.2	mouse	genbank	58_37k	-1	validated	silent	c.315	p.G105	0	HMMPfam_Collagen	HMMPfam_C4,HMMSmart_SM00111,HMMPfam_Collagen,superfamily_C-type lectin-like	0	no_errors	MOC23	166	0	0	108	1	0.92	107	36	25	148	0	0
1	82583934	82583934	T	A	SNP	Col4a3	NM_007734.2	mouse	genbank	58_37k	1	validated	silent	c.15	p.T5	0	NULL	HMMPfam_C4,HMMSmart_C4,HMMPfam_Collagen,superfamily_C-type_lectin_fold	0	no_errors	MOC1	111	18	13.95	111	0	0	193	0	0	180	0	0
1	82583960	82583960	T	A	SNP	Col4a3	NM_007734.2	mouse	genbank	58_37k	1	validated	missense	c.41	p.L14Q	0	NULL	HMMPfam_C4,HMMSmart_C4,HMMPfam_Collagen,superfamily_C-type_lectin_fold	0	no_errors	MOC22	131	0	0	89	24	21.24	193	0	0	191	0	0
1	82651726	82651726	G	C	SNP	Col4a3	NM_007734.2	mouse	genbank	58_37k	1	validated	missense	c.635	p.R212T	0	HMMPfam_Collagen	HMMPfam_C4,HMMSmart_C4,HMMPfam_Collagen,superfamily_C-type_lectin_fold	0	no_errors	MOC23	72	0	0	61	0	0	51	25	32.89	54	0	0
1	82665651	82665651	G	C	SNP	Col4a3	NM_007734.2	mouse	genbank	58_37k	1	validated	missense	c.1307	p.G436A	0	HMMPfam_Collagen	HMMPfam_C4,HMMSmart_C4,HMMPfam_Collagen,superfamily_C-type_lectin_fold	0	no_errors	MOC1	9	34	79.07	48	0	0	74	0	0	59	0	0
1	82754033	82754033	A	G	SNP	Tm4sf20	NM_025453.3	mouse	genbank	58_37k	-1	provisional	missense	c.655	p.S219P	0	HMMPfam_L6_membrane	HMMPfam_L6_membrane	0	no_errors	MOC23	34	0	0	32	0	0	46	20	30.3	52	2	3.7
1	82854955	82854955	G	A	SNP	Agfg1	NM_010472.2	mouse	genbank	58_37k	1	provisional	silent	c.192	p.R64	0	HMMPfam_ArfGap,HMMSmart_ArfGap,superfamily_ArfGAP	HMMPfam_ArfGap,HMMSmart_ArfGap,superfamily_ArfGAP	0	no_errors	MOC22	65	0	0	37	14	27.45	63	0	0	72	0	0
1	83000511	83000511	T	A	SNP	LOC665246	XR_031030.1	mouse	genbank	58_37k	-1	model	rna	NULL	NULL	0	0	0	0	pseudogene	MOC23	120	0	0	116	1	0.85	138	33	19.19	167	0	0
1	83272613	83272613	T	G	SNP	Sphkap	NM_172430.3	mouse	genbank	58_37k	-1	validated	missense	c.3989	p.Q1330P	0	NULL	HMMPfam_AKAP_110	0	no_errors	MOC23	93	0	0	94	2	2.08	29	81	73.64	96	0	0
1	83311412	83311412	A	G	SNP	EG622958	XM_891787.2	mouse	genbank	58_37k	1	model	missense	c.325	p.I109V	0	HMMPfam_RRF,superfamily_Ribosome recycling factor RRF	HMMPfam_RRF,superfamily_Ribosome recycling factor RRF	0	pseudogene	MOC22	82	0	0	34	24	41.38	115	0	0	94	0	0
1	83311626	83311626	T	A	SNP	EG622958	XM_891787.2	mouse	genbank	58_37k	1	model	missense	c.539	p.V180E	0	HMMPfam_RRF,superfamily_Ribosome recycling factor RRF	HMMPfam_RRF,superfamily_Ribosome recycling factor RRF	0	pseudogene	MOC22	64	1	1.54	34	20	37.04	89	1	1.11	81	0	0
1	84380415	84380415	A	T	SNP	Dner	NM_152915.1	mouse	genbank	58_37k	-1	provisional	missense	c.2047	p.C683S	0	NULL	PatternScan_ASX_HYDROXYL,HMMSmart_EGF_CA,HMMPfam_EGF,HMMSmart_EGF,PatternScan_EGF_1,PatternScan_EGF_2,PatternScan_EGF_CA,superfamily_SSF57196	0	no_errors	MOC1	55	11	16.67	59	0	0	120	0	0	109	0	0
1	85110180	85110180	A	T	SNP	LOC100039742	XM_001473420.1	mouse	genbank	58_37k	-1	model	missense	c.224	p.M75K	0	HMMPfam_Sp100	HMMPfam_Sp100	0	no_errors	MOC23	151	0	0	136	0	0	52	109	67.7	193	1	0.52
1	85209740	85209740	T	A	SNP	Gm7609	NM_001081746.1	mouse	genbank	58_37k	1	validated	silent	c.516	p.P172	0	superfamily_Family A G protein-coupled receptor-like	superfamily_Family A G protein-coupled receptor-like	0	no_errors	MOC1	211	26	10.97	235	0	0	344	0	0	305	0	0
1	85266622	85266622	A	T	SNP	C130026I21Rik	NM_175219.3	mouse	genbank	58_37k	-1	validated	missense	c.18	p.N6K	0	NULL	HMMPfam_Sp100	0	no_errors	MOC23	50	0	0	46	0	0	64	11	14.67	68	0	0
1	87381052	87381052	A	T	SNP	LOC100040213	XM_001474231.1	mouse	genbank	58_37k	-1	model	silent	c.666	p.T222	0	superfamily_Family A G protein-coupled receptor-like	superfamily_Family A G protein-coupled receptor-like	0	no_errors	MOC23	109	0	0	137	0	0	95	73	43.45	163	0	0
1	87995995	87995995	A	T	SNP	Htr2b	NM_008311.2	mouse	genbank	58_37k	-1	validated	missense	c.1363	p.S455T	0	NULL	HMMPfam_7tm_1,PatternScan_G_PROTEIN_RECEP_F1_1,superfamily_Family A G protein-coupled receptor-like	0	no_errors	MOC23	79	0	0	64	2	3.03	29	76	72.38	92	2	2.13
1	87996719	87996719	A	C	SNP	Htr2b	NM_008311.2	mouse	genbank	58_37k	-1	validated	missense	c.639	p.F213L	0	HMMPfam_7tm_1,superfamily_Family A G protein-coupled receptor-like	HMMPfam_7tm_1,PatternScan_G_PROTEIN_RECEP_F1_1,superfamily_Family A G protein-coupled receptor-like	0	no_errors	MOC22	64	0	0	37	23	38.33	73	0	0	60	0	0
1	88087616	88087616	G	T	SNP	Armc9	NM_030184.2	mouse	genbank	58_37k	1	validated	missense	c.1061	p.R354M	0	superfamily_ARM repeat	HMMSmart_SM00667,superfamily_ARM repeat	0	no_errors	MOC1	77	17	18.09	85	0	0	137	0	0	116	0	0
1	88202586	88202586	G	T	SNP	B3gnt7	NM_145222.2	mouse	genbank	58_37k	1	validated	silent	c.978	p.L326	0	HMMPfam_Galactosyl_T	HMMPfam_Galactosyl_T	0	no_errors	MOC22	85	0	0	40	33	45.21	97	0	0	74	0	0
1	88268593	88268593	A	T	SNP	C130036L24Rik	ENSMUST00000097665	mouse	ensembl	58_37k	1	known	silent	c.9	p.L3	0	NULL	NULL	0	no_errors	MOC22	44	0	0	11	20	64.52	38	0	0	32	0	0
1	88323294	88323294	A	T	SNP	1700019O17Rik	ENSMUST00000046004	mouse	ensembl	58_37k	1	known	missense	c.349	p.T117S	0	NULL	NULL	0	no_errors	MOC22	169	0	0	41	83	66.94	196	3	1.51	122	0	0
1	88324049	88324049	A	T	SNP	1700019O17Rik	ENSMUST00000046004	mouse	ensembl	58_37k	1	known	silent	c.1104	p.P368	0	NULL	NULL	0	no_errors	MOC1	107	18	14.29	110	0	0	116	0	0	129	1	0.77
1	88984254	88984254	G	A	SNP	Alppl2	NM_007433.3	mouse	genbank	58_37k	-1	validated	nonsense	c.1159	p.Q387*	0	HMMPfam_Alk_phosphatase,HMMSmart_alkPPc,superfamily_Alkaline_phosphatase_core	HMMPfam_Alk_phosphatase,HMMSmart_alkPPc,superfamily_Alkaline_phosphatase_core,PatternScan_ALKALINE_PHOSPHATASE	0	no_errors	MOC22	104	0	0	62	24	27.91	150	0	0	149	0	0
1	88985623	88985623	A	T	SNP	Alppl2	NM_007433.3	mouse	genbank	58_37k	-1	validated	missense	c.374	p.M125K	0	HMMPfam_Alk_phosphatase,HMMSmart_alkPPc,superfamily_Alkaline_phosphatase_core	HMMPfam_Alk_phosphatase,HMMSmart_alkPPc,superfamily_Alkaline_phosphatase_core,PatternScan_ALKALINE_PHOSPHATASE	0	no_errors	MOC22	249	0	0	154	60	28.04	360	1	0.28	318	1	0.31
1	88995449	88995449	T	A	SNP	Alpi	NM_001081082.1	mouse	genbank	58_37k	-1	provisional	missense	c.1394	p.Q465L	0	HMMPfam_Alk_phosphatase,HMMSmart_SM00098,superfamily_Alkaline phosphatase-like	HMMPfam_Alk_phosphatase,HMMSmart_SM00098,superfamily_Alkaline phosphatase-like,PatternScan_ALKALINE_PHOSPHATASE	0	no_errors	MOC22	117	0	0	37	69	65.09	159	0	0	175	0	0
1	89046140	89046140	G	T	SNP	Ecel1	NM_021306.2	mouse	genbank	58_37k	-1	provisional	nonsense	c.1920	p.Y640*	0	HMMPfam_Peptidase_M13,superfamily_SSF55486	PatternScan_ZINC_PROTEASE,HMMPfam_Peptidase_M13_N,HMMPfam_Peptidase_M13,superfamily_SSF55486	0	no_errors	MOC23	129	0	0	104	0	0	32	122	79.22	162	1	0.61
1	89048716	89048716	A	T	SNP	Ecel1	NM_021306.2	mouse	genbank	58_37k	-1	provisional	missense	c.1249	p.F417I	0	HMMPfam_Peptidase_M13_N,superfamily_SSF55486	PatternScan_ZINC_PROTEASE,HMMPfam_Peptidase_M13_N,HMMPfam_Peptidase_M13,superfamily_SSF55486	0	no_errors	MOC22	184	0	0	57	90	61.22	197	0	0	183	0	0
1	89161274	89161274	G	C	SNP	Efhd1	NM_028889.2	mouse	genbank	58_37k	1	provisional	missense	c.250	p.E84Q	0	NULL	HMMSmart_EFh,PatternScan_EF_HAND_1,HMMPfam_efhand,superfamily_SSF47473	0	no_errors	MOC22	74	0	0	44	21	32.31	123	0	0	110	0	0
1	89206257	89206257	A	G	SNP	Efhd1	NM_028889.2	mouse	genbank	58_37k	1	provisional	missense	c.610	p.S204G	0	NULL	HMMSmart_EFh,PatternScan_EF_HAND_1,HMMPfam_efhand,superfamily_SSF47473	0	no_errors	MOC1	6	41	87.23	38	0	0	42	0	0	49	0	0
1	89303904	89303904	A	T	SNP	Gigyf2	NM_146112.4	mouse	genbank	58_37k	1	validated	missense	c.970	p.M324L	0	NULL	HMMPfam_GYF,HMMSmart_SM00444,superfamily_GYF domain	0	no_errors	MOC23	64	0	0	58	1	1.69	10	49	81.67	81	0	0
1	89316943	89316943	A	T	SNP	Gigyf2	NM_146112.4	mouse	genbank	58_37k	1	validated	missense	c.1985	p.Q662L	0	NULL	HMMPfam_GYF,HMMSmart_SM00444,superfamily_GYF domain	0	no_errors	MOC22	149	0	0	41	101	71.13	192	2	1.03	178	0	0
1	89321749	89321749	A	T	SNP	Gigyf2	NM_146112.4	mouse	genbank	58_37k	1	validated	missense	c.2321	p.Q774L	0	NULL	HMMPfam_GYF,HMMSmart_SM00444,superfamily_GYF domain	0	no_errors	MOC1	61	9	12.68	58	0	0	73	0	0	54	0	0
1	89374263	89374263	T	A	SNP	Ngef	NM_019867.2	mouse	genbank	58_37k	-1	validated	missense	c.1531	p.M511L	0	HMMPfam_SH3_1,HMMSmart_SM00326,superfamily_SH3-domain	HMMPfam_RhoGEF,HMMSmart_SM00325,superfamily_DBL homology domain (DH-domain),HMMPfam_SH3_1,HMMSmart_SM00326,superfamily_SH3-domain,HMMPfam_PH,HMMSmart_SM00233,superfamily_PH domain-like	0	no_errors	MOC22	138	0	0	43	91	67.91	176	0	0	195	3	1.49
1	89386183	89386183	A	T	SNP	Ngef	NM_019867.2	mouse	genbank	58_37k	-1	validated	missense	c.497	p.L166Q	0	HMMPfam_RhoGEF,HMMSmart_SM00325,superfamily_DBL homology domain (DH-domain)	HMMPfam_RhoGEF,HMMSmart_SM00325,superfamily_DBL homology domain (DH-domain),HMMPfam_SH3_1,HMMSmart_SM00326,superfamily_SH3-domain,HMMPfam_PH,HMMSmart_SM00233,superfamily_PH domain-like	0	no_errors	MOC23	123	0	0	118	0	0	139	39	21.91	208	0	0
1	89493151	89493151	A	T	SNP	Neu2	NM_015750.3	mouse	genbank	58_37k	1	validated	missense	c.240	p.E80D	0	superfamily_Sialidases (neuraminidases)	superfamily_Sialidases (neuraminidases)	0	no_errors	MOC1	29	145	83.33	162	0	0	229	0	0	225	0	0
1	89517197	89517197	T	A	SNP	Inpp5d	NM_010566.2	mouse	genbank	58_37k	1	validated	missense	c.134	p.L45H	0	HMMPfam_SH2,HMMSmart_SM00252,superfamily_SH2 domain	HMMSmart_SM00128,HMMPfam_SH2,HMMSmart_SM00252,HMMPfam_Exo_endo_phos,superfamily_DNase I-like,superfamily_SH2 domain	0	no_errors	MOC23	105	0	0	83	0	0	42	81	65.85	120	0	0
1	89607638	89607638	A	T	SNP	Inpp5d	NM_010566.2	mouse	genbank	58_37k	1	validated	splice_site	c.2368-2	e22-2	0	0	0	0	no_errors	MOC23	191	0	0	186	1	0.53	169	61	26.52	197	0	0
1	89719971	89719971	T	A	SNP	Sag	NM_009118.2	mouse	genbank	58_37k	1	validated	missense	c.583	p.W195R	0	superfamily_E set domains	HMMPfam_Arrestin_N,HMMPfam_Arrestin_C,superfamily_E set domains,PatternScan_ARRESTINS	0	no_errors	MOC22	116	0	0	65	25	27.47	131	0	0	108	0	0
1	89821125	89821125	A	C	SNP	Dgkd	ENSMUST00000027517	mouse	ensembl	58_37k	1	known	missense	c.706	p.S236R	0	NULL	HMMPfam_DAGK_acc,HMMSmart_SM00045,HMMPfam_DAGK_cat,HMMSmart_SM00046,HMMPfam_C1_1,HMMSmart_SM00109,PatternScan_ZF_DAG_PE_1,superfamily_Cysteine-rich domain	0	no_stop_codon	MOC1	28	125	81.7	146	0	0	222	0	0	233	0	0
1	89885495	89885495	T	C	SNP	Usp40	NM_001033291.2	mouse	genbank	58_37k	-1	provisional	missense	c.1135	p.K379E	0	HMMPfam_UCH,superfamily_SSF54001	HMMPfam_UCH,PatternScan_UCH_2_1,PatternScan_UCH_2_2,superfamily_SSF54001	0	no_errors	MOC22	233	0	0	60	113	65.32	298	4	1.32	237	0	0
1	89919592	89919592	A	T	SNP	LOC545344	XR_032285.1	mouse	genbank	58_37k	1	model	rna	NULL	NULL	0	0	0	0	pseudogene	MOC23	80	0	0	58	0	0	33	91	73.39	90	2	2.17
1	90063397	90063397	A	T	SNP	Ugt1a6a	ENSMUST00000097659	mouse	ensembl	58_37k	1	known	silent	c.771	p.V257	0	HMMPfam_UDPGT,superfamily_SSF53756	HMMPfam_UDPGT,PatternScan_UDPGT,superfamily_SSF53756	0	no_errors	MOC22	168	0	0	81	45	35.71	198	0	0	184	2	1.08
1	90108596	90108596	G	A	SNP	Ugt1a6a	ENSMUST00000073049	mouse	ensembl	58_37k	1	known	missense	c.20	p.S7N	0	NULL	HMMPfam_UDPGT,PatternScan_UDPGT,superfamily_SSF53756	0	no_errors	MOC23	609	208	25.4	601	200	24.94	947	381	28.65	413	0	0
1	90108711	90108711	G	A	SNP	Ugt1a6a	ENSMUST00000073049	mouse	ensembl	58_37k	1	known	missense	c.135	p.M45I	0	HMMPfam_UDPGT,superfamily_SSF53756	HMMPfam_UDPGT,PatternScan_UDPGT,superfamily_SSF53756	0	no_errors	MOC1	535	77	12.58	570	77	11.88	849	134	13.62	261	2	0.76
1	90108711	90108711	G	A	SNP	Ugt1a6a	ENSMUST00000073049	mouse	ensembl	58_37k	1	known	missense	c.135	p.M45I	0	HMMPfam_UDPGT,superfamily_SSF53756	HMMPfam_UDPGT,PatternScan_UDPGT,superfamily_SSF53756	0	no_errors	MOC22	535	77	12.58	570	77	11.88	849	134	13.62	261	2	0.76
1	90108711	90108711	G	A	SNP	Ugt1a6a	ENSMUST00000073049	mouse	ensembl	58_37k	1	known	missense	c.135	p.M45I	0	HMMPfam_UDPGT,superfamily_SSF53756	HMMPfam_UDPGT,PatternScan_UDPGT,superfamily_SSF53756	0	no_errors	MOC23	535	77	12.58	570	77	11.88	849	134	13.62	261	2	0.76
1	90108819	90108819	C	T	SNP	Ugt1a6a	ENSMUST00000073049	mouse	ensembl	58_37k	1	known	silent	c.243	p.F81	0	HMMPfam_UDPGT,superfamily_SSF53756	HMMPfam_UDPGT,PatternScan_UDPGT,superfamily_SSF53756	0	no_errors	MOC1	676	232	25.41	622	253	28.85	909	382	29.59	379	1	0.26
1	90108819	90108819	C	T	SNP	Ugt1a6a	ENSMUST00000073049	mouse	ensembl	58_37k	1	known	silent	c.243	p.F81	0	HMMPfam_UDPGT,superfamily_SSF53756	HMMPfam_UDPGT,PatternScan_UDPGT,superfamily_SSF53756	0	no_errors	MOC22	676	232	25.41	622	253	28.85	909	382	29.59	379	1	0.26
1	90108819	90108819	C	T	SNP	Ugt1a6a	ENSMUST00000073049	mouse	ensembl	58_37k	1	known	silent	c.243	p.F81	0	HMMPfam_UDPGT,superfamily_SSF53756	HMMPfam_UDPGT,PatternScan_UDPGT,superfamily_SSF53756	0	no_errors	MOC23	676	232	25.41	622	253	28.85	909	382	29.59	379	1	0.26
1	90108906	90108906	C	T	SNP	Ugt1a6a	ENSMUST00000073049	mouse	ensembl	58_37k	1	known	silent	c.330	p.R110	0	HMMPfam_UDPGT,superfamily_SSF53756	HMMPfam_UDPGT,PatternScan_UDPGT,superfamily_SSF53756	0	no_errors	MOC1	603	182	23.18	564	199	26.08	814	299	26.86	336	3	0.88
1	90108906	90108906	C	T	SNP	Ugt1a6a	ENSMUST00000073049	mouse	ensembl	58_37k	1	known	silent	c.330	p.R110	0	HMMPfam_UDPGT,superfamily_SSF53756	HMMPfam_UDPGT,PatternScan_UDPGT,superfamily_SSF53756	0	no_errors	MOC22	603	182	23.18	564	199	26.08	814	299	26.86	336	3	0.88
1	90108906	90108906	C	T	SNP	Ugt1a6a	ENSMUST00000073049	mouse	ensembl	58_37k	1	known	silent	c.330	p.R110	0	HMMPfam_UDPGT,superfamily_SSF53756	HMMPfam_UDPGT,PatternScan_UDPGT,superfamily_SSF53756	0	no_errors	MOC23	603	182	23.18	564	199	26.08	814	299	26.86	336	3	0.88
1	90108957	90108957	T	A	SNP	Ugt1a6a	ENSMUST00000073049	mouse	ensembl	58_37k	1	known	silent	c.381	p.A127	0	HMMPfam_UDPGT,superfamily_SSF53756	HMMPfam_UDPGT,PatternScan_UDPGT,superfamily_SSF53756	0	no_errors	MOC1	559	193	25.66	562	205	26.73	811	335	29.23	343	5	1.44
1	90108957	90108957	T	A	SNP	Ugt1a6a	ENSMUST00000073049	mouse	ensembl	58_37k	1	known	silent	c.381	p.A127	0	HMMPfam_UDPGT,superfamily_SSF53756	HMMPfam_UDPGT,PatternScan_UDPGT,superfamily_SSF53756	0	no_errors	MOC22	559	193	25.66	562	205	26.73	811	335	29.23	343	5	1.44
1	90108957	90108957	T	A	SNP	Ugt1a6a	ENSMUST00000073049	mouse	ensembl	58_37k	1	known	silent	c.381	p.A127	0	HMMPfam_UDPGT,superfamily_SSF53756	HMMPfam_UDPGT,PatternScan_UDPGT,superfamily_SSF53756	0	no_errors	MOC23	559	193	25.66	562	205	26.73	811	335	29.23	343	5	1.44
1	90109027	90109027	C	A	SNP	Ugt1a6a	ENSMUST00000073049	mouse	ensembl	58_37k	1	known	missense	c.451	p.L151M	0	HMMPfam_UDPGT,superfamily_SSF53756	HMMPfam_UDPGT,PatternScan_UDPGT,superfamily_SSF53756	0	no_errors	MOC1	679	225	24.81	675	260	27.75	950	399	29.58	399	3	0.75
1	90109027	90109027	C	A	SNP	Ugt1a6a	ENSMUST00000073049	mouse	ensembl	58_37k	1	known	missense	c.451	p.L151M	0	HMMPfam_UDPGT,superfamily_SSF53756	HMMPfam_UDPGT,PatternScan_UDPGT,superfamily_SSF53756	0	no_errors	MOC22	679	225	24.81	675	260	27.75	950	399	29.58	399	3	0.75
1	90109027	90109027	C	A	SNP	Ugt1a6a	ENSMUST00000073049	mouse	ensembl	58_37k	1	known	missense	c.451	p.L151M	0	HMMPfam_UDPGT,superfamily_SSF53756	HMMPfam_UDPGT,PatternScan_UDPGT,superfamily_SSF53756	0	no_errors	MOC23	679	225	24.81	675	260	27.75	950	399	29.58	399	3	0.75
1	90109040	90109040	T	C	SNP	Ugt1a6a	ENSMUST00000073049	mouse	ensembl	58_37k	1	known	missense	c.464	p.F155S	0	HMMPfam_UDPGT,superfamily_SSF53756	HMMPfam_UDPGT,PatternScan_UDPGT,superfamily_SSF53756	0	no_errors	MOC1	657	254	27.88	690	263	27.57	982	431	30.5	433	3	0.69
1	90109040	90109040	T	C	SNP	Ugt1a6a	ENSMUST00000073049	mouse	ensembl	58_37k	1	known	missense	c.464	p.F155S	0	HMMPfam_UDPGT,superfamily_SSF53756	HMMPfam_UDPGT,PatternScan_UDPGT,superfamily_SSF53756	0	no_errors	MOC22	657	254	27.88	690	263	27.57	982	431	30.5	433	3	0.69
1	90109040	90109040	T	C	SNP	Ugt1a6a	ENSMUST00000073049	mouse	ensembl	58_37k	1	known	missense	c.464	p.F155S	0	HMMPfam_UDPGT,superfamily_SSF53756	HMMPfam_UDPGT,PatternScan_UDPGT,superfamily_SSF53756	0	no_errors	MOC23	657	254	27.88	690	263	27.57	982	431	30.5	433	3	0.69
1	90109143	90109143	C	T	SNP	Ugt1a6a	ENSMUST00000073049	mouse	ensembl	58_37k	1	known	silent	c.567	p.P189	0	HMMPfam_UDPGT,superfamily_SSF53756	HMMPfam_UDPGT,PatternScan_UDPGT,superfamily_SSF53756	0	no_errors	MOC1	981	384	28.11	957	350	26.76	1419	604	29.81	642	0	0
1	90109143	90109143	C	T	SNP	Ugt1a6a	ENSMUST00000073049	mouse	ensembl	58_37k	1	known	silent	c.567	p.P189	0	HMMPfam_UDPGT,superfamily_SSF53756	HMMPfam_UDPGT,PatternScan_UDPGT,superfamily_SSF53756	0	no_errors	MOC22	981	384	28.11	957	350	26.76	1419	604	29.81	642	0	0
1	90109143	90109143	C	T	SNP	Ugt1a6a	ENSMUST00000073049	mouse	ensembl	58_37k	1	known	silent	c.567	p.P189	0	HMMPfam_UDPGT,superfamily_SSF53756	HMMPfam_UDPGT,PatternScan_UDPGT,superfamily_SSF53756	0	no_errors	MOC23	981	384	28.11	957	350	26.76	1419	604	29.81	642	0	0
1	90109212	90109212	G	A	SNP	Ugt1a6a	ENSMUST00000073049	mouse	ensembl	58_37k	1	known	silent	c.636	p.V212	0	HMMPfam_UDPGT,superfamily_SSF53756	HMMPfam_UDPGT,PatternScan_UDPGT,superfamily_SSF53756	0	no_errors	MOC1	888	553	38.38	866	497	36.46	1211	934	43.54	739	3	0.4
1	90109212	90109212	G	A	SNP	Ugt1a6a	ENSMUST00000073049	mouse	ensembl	58_37k	1	known	silent	c.636	p.V212	0	HMMPfam_UDPGT,superfamily_SSF53756	HMMPfam_UDPGT,PatternScan_UDPGT,superfamily_SSF53756	0	no_errors	MOC22	888	553	38.38	866	497	36.46	1211	934	43.54	739	3	0.4
1	90109212	90109212	G	A	SNP	Ugt1a6a	ENSMUST00000073049	mouse	ensembl	58_37k	1	known	silent	c.636	p.V212	0	HMMPfam_UDPGT,superfamily_SSF53756	HMMPfam_UDPGT,PatternScan_UDPGT,superfamily_SSF53756	0	no_errors	MOC23	888	553	38.38	866	497	36.46	1211	934	43.54	739	3	0.4
1	90109271	90109271	A	T	SNP	Ugt1a6a	ENSMUST00000073049	mouse	ensembl	58_37k	1	known	missense	c.695	p.Y232F	0	HMMPfam_UDPGT,superfamily_SSF53756	HMMPfam_UDPGT,PatternScan_UDPGT,superfamily_SSF53756	0	no_errors	MOC1	732	261	26.18	718	298	29.33	1116	463	29.3	480	2	0.41
1	90109271	90109271	A	T	SNP	Ugt1a6a	ENSMUST00000073049	mouse	ensembl	58_37k	1	known	missense	c.695	p.Y232F	0	HMMPfam_UDPGT,superfamily_SSF53756	HMMPfam_UDPGT,PatternScan_UDPGT,superfamily_SSF53756	0	no_errors	MOC22	732	261	26.18	718	298	29.33	1116	463	29.3	480	2	0.41
1	90109271	90109271	A	T	SNP	Ugt1a6a	ENSMUST00000073049	mouse	ensembl	58_37k	1	known	missense	c.695	p.Y232F	0	HMMPfam_UDPGT,superfamily_SSF53756	HMMPfam_UDPGT,PatternScan_UDPGT,superfamily_SSF53756	0	no_errors	MOC23	732	261	26.18	718	298	29.33	1116	463	29.3	480	2	0.41
1	90109353	90109353	A	G	SNP	Ugt1a6a	ENSMUST00000073049	mouse	ensembl	58_37k	1	known	silent	c.777	p.R259	0	HMMPfam_UDPGT,superfamily_SSF53756	HMMPfam_UDPGT,PatternScan_UDPGT,superfamily_SSF53756	0	no_errors	MOC1	590	87	12.85	557	79	12.4	838	142	14.49	280	1	0.36
1	90109353	90109353	A	G	SNP	Ugt1a6a	ENSMUST00000073049	mouse	ensembl	58_37k	1	known	silent	c.777	p.R259	0	HMMPfam_UDPGT,superfamily_SSF53756	HMMPfam_UDPGT,PatternScan_UDPGT,superfamily_SSF53756	0	no_errors	MOC22	590	87	12.85	557	79	12.4	838	142	14.49	280	1	0.36
1	90109353	90109353	A	G	SNP	Ugt1a6a	ENSMUST00000073049	mouse	ensembl	58_37k	1	known	silent	c.777	p.R259	0	HMMPfam_UDPGT,superfamily_SSF53756	HMMPfam_UDPGT,PatternScan_UDPGT,superfamily_SSF53756	0	no_errors	MOC23	590	87	12.85	557	79	12.4	838	142	14.49	280	1	0.36
1	90111749	90111749	C	T	SNP	Ugt1a6a	ENSMUST00000073049	mouse	ensembl	58_37k	1	known	missense	c.1001	p.T334M	0	HMMPfam_UDPGT,superfamily_SSF53756	HMMPfam_UDPGT,PatternScan_UDPGT,superfamily_SSF53756	0	no_errors	MOC1	185	92	33.09	184	79	30.04	291	124	29.88	116	0	0
1	90111749	90111749	C	T	SNP	Ugt1a6a	ENSMUST00000073049	mouse	ensembl	58_37k	1	known	missense	c.1001	p.T334M	0	HMMPfam_UDPGT,superfamily_SSF53756	HMMPfam_UDPGT,PatternScan_UDPGT,superfamily_SSF53756	0	no_errors	MOC22	185	92	33.09	184	79	30.04	291	124	29.88	116	0	0
1	90111749	90111749	C	T	SNP	Ugt1a6a	ENSMUST00000073049	mouse	ensembl	58_37k	1	known	missense	c.1001	p.T334M	0	HMMPfam_UDPGT,superfamily_SSF53756	HMMPfam_UDPGT,PatternScan_UDPGT,superfamily_SSF53756	0	no_errors	MOC23	185	92	33.09	184	79	30.04	291	124	29.88	116	0	0
1	90112715	90112715	C	A	SNP	Ugt1a6a	ENSMUST00000073049	mouse	ensembl	58_37k	1	known	missense	c.1093	p.H365N	0	HMMPfam_UDPGT,PatternScan_UDPGT,superfamily_SSF53756	HMMPfam_UDPGT,PatternScan_UDPGT,superfamily_SSF53756	0	no_errors	MOC22	130	14	9.72	143	18	11.18	167	26	13.47	60	0	0
1	90112715	90112715	C	A	SNP	Ugt1a6a	ENSMUST00000073049	mouse	ensembl	58_37k	1	known	missense	c.1093	p.H365N	0	HMMPfam_UDPGT,PatternScan_UDPGT,superfamily_SSF53756	HMMPfam_UDPGT,PatternScan_UDPGT,superfamily_SSF53756	0	no_errors	MOC23	130	14	9.72	143	18	11.18	167	26	13.47	60	0	0
1	90112759	90112759	T	C	SNP	Ugt1a6a	ENSMUST00000126203	mouse	ensembl	58_37k	1	known	missense	c.362	p.V121A	0	NULL	HMMPfam_UDPGT,superfamily_UDP-Glycosyltransferase/glycogen phosphorylase	0	no_errors	MOC23	190	0	0	181	0	0	212	27	11.25	73	1	1.32
1	90112788	90112788	C	T	SNP	Ugt1a6a	ENSMUST00000126203	mouse	ensembl	58_37k	1	known	nonsense	c.391	p.R131*	0	NULL	HMMPfam_UDPGT,superfamily_UDP-Glycosyltransferase/glycogen phosphorylase	0	no_errors	MOC1	91	133	59.11	67	155	69.82	75	205	73.21	87	2	2.25
1	90112788	90112788	C	T	SNP	Ugt1a6a	ENSMUST00000126203	mouse	ensembl	58_37k	1	known	nonsense	c.391	p.R131*	0	NULL	HMMPfam_UDPGT,superfamily_UDP-Glycosyltransferase/glycogen phosphorylase	0	no_errors	MOC22	91	133	59.11	67	155	69.82	75	205	73.21	87	2	2.25
1	90114901	90114901	G	T	SNP	Ugt1a6a	ENSMUST00000073049	mouse	ensembl	58_37k	1	known	missense	c.1510	p.V504L	0	HMMPfam_UDPGT	HMMPfam_UDPGT,PatternScan_UDPGT,superfamily_SSF53756	0	no_errors	MOC1	997	130	11.54	1110	1	0.09	1576	1	0.06	610	1	0.16
1	90114935	90114935	G	A	SNP	Ugt1a6a	ENSMUST00000073049	mouse	ensembl	58_37k	1	known	missense	c.1544	p.G515D	0	HMMPfam_UDPGT	HMMPfam_UDPGT,PatternScan_UDPGT,superfamily_SSF53756	0	no_errors	MOC1	657	269	28.96	643	234	26.68	856	402	31.96	436	1	0.23
1	90114935	90114935	G	A	SNP	Ugt1a6a	ENSMUST00000073049	mouse	ensembl	58_37k	1	known	missense	c.1544	p.G515D	0	HMMPfam_UDPGT	HMMPfam_UDPGT,PatternScan_UDPGT,superfamily_SSF53756	0	no_errors	MOC22	657	269	28.96	643	234	26.68	856	402	31.96	436	1	0.23
1	90114963	90114963	G	A	SNP	Ugt1a6a	ENSMUST00000073049	mouse	ensembl	58_37k	1	known	silent	c.1572	p.G524	0	HMMPfam_UDPGT	HMMPfam_UDPGT,PatternScan_UDPGT,superfamily_SSF53756	0	no_errors	MOC22	507	194	27.64	483	190	28.15	649	294	31.14	315	1	0.32
1	90128867	90128867	C	T	SNP	ENSMUSG00000079429	ENSMUST00000113130	mouse	ensembl	58_37k	1	known	missense	c.605	p.T202M	0	superfamily_ARM repeat	superfamily_ARM repeat	0	no_errors	MOC1	341	58	14.54	336	42	11.11	426	71	14.29	278	1	0.36
1	90128867	90128867	C	T	SNP	ENSMUSG00000079429	ENSMUST00000113130	mouse	ensembl	58_37k	1	known	missense	c.605	p.T202M	0	superfamily_ARM repeat	superfamily_ARM repeat	0	no_errors	MOC22	341	58	14.54	336	42	11.11	426	71	14.29	278	1	0.36
1	90128867	90128867	C	T	SNP	ENSMUSG00000079429	ENSMUST00000113130	mouse	ensembl	58_37k	1	known	missense	c.605	p.T202M	0	superfamily_ARM repeat	superfamily_ARM repeat	0	no_errors	MOC23	341	58	14.54	336	42	11.11	426	71	14.29	278	1	0.36
1	90129968	90129968	G	A	SNP	ENSMUSG00000079429	ENSMUST00000113130	mouse	ensembl	58_37k	1	known	silent	c.732	p.E244	0	superfamily_ARM repeat	superfamily_ARM repeat	0	no_errors	MOC22	443	226	33.73	429	178	29.32	647	391	37.67	476	3	0.63
1	90130712	90130712	G	A	SNP	ENSMUSG00000079429	ENSMUST00000113130	mouse	ensembl	58_37k	1	known	missense	c.943	p.V315I	0	superfamily_ARM repeat	superfamily_ARM repeat	0	no_errors	MOC1	232	89	27.73	255	94	26.93	300	150	33.33	216	0	0
1	90130712	90130712	G	A	SNP	ENSMUSG00000079429	ENSMUST00000113130	mouse	ensembl	58_37k	1	known	missense	c.943	p.V315I	0	superfamily_ARM repeat	superfamily_ARM repeat	0	no_errors	MOC22	232	89	27.73	255	94	26.93	300	150	33.33	216	0	0
1	90130712	90130712	G	A	SNP	ENSMUSG00000079429	ENSMUST00000113130	mouse	ensembl	58_37k	1	known	missense	c.943	p.V315I	0	superfamily_ARM repeat	superfamily_ARM repeat	0	no_errors	MOC23	232	89	27.73	255	94	26.93	300	150	33.33	216	0	0
1	90131556	90131556	G	A	SNP	ENSMUSG00000079429	ENSMUST00000113130	mouse	ensembl	58_37k	1	known	silent	c.963	p.Q321	0	superfamily_ARM repeat	superfamily_ARM repeat	0	no_errors	MOC1	557	201	26.52	539	176	24.62	705	320	31.22	554	4	0.72
1	90131556	90131556	G	A	SNP	ENSMUSG00000079429	ENSMUST00000113130	mouse	ensembl	58_37k	1	known	silent	c.963	p.Q321	0	superfamily_ARM repeat	superfamily_ARM repeat	0	no_errors	MOC22	557	201	26.52	539	176	24.62	705	320	31.22	554	4	0.72
1	90131556	90131556	G	A	SNP	ENSMUSG00000079429	ENSMUST00000113130	mouse	ensembl	58_37k	1	known	silent	c.963	p.Q321	0	superfamily_ARM repeat	superfamily_ARM repeat	0	no_errors	MOC23	557	201	26.52	539	176	24.62	705	320	31.22	554	4	0.72
1	90131571	90131571	G	A	SNP	ENSMUSG00000079429	ENSMUST00000113130	mouse	ensembl	58_37k	1	known	silent	c.978	p.S326	0	superfamily_ARM repeat	superfamily_ARM repeat	0	no_errors	MOC1	650	125	16.13	625	120	16.11	874	224	20.38	602	3	0.5
1	90131571	90131571	G	A	SNP	ENSMUSG00000079429	ENSMUST00000113130	mouse	ensembl	58_37k	1	known	silent	c.978	p.S326	0	superfamily_ARM repeat	superfamily_ARM repeat	0	no_errors	MOC22	650	125	16.13	625	120	16.11	874	224	20.38	602	3	0.5
1	90131571	90131571	G	A	SNP	ENSMUSG00000079429	ENSMUST00000113130	mouse	ensembl	58_37k	1	known	silent	c.978	p.S326	0	superfamily_ARM repeat	superfamily_ARM repeat	0	no_errors	MOC23	650	125	16.13	625	120	16.11	874	224	20.38	602	3	0.5
1	90132024	90132024	G	T	SNP	ENSMUSG00000079429	ENSMUST00000113130	mouse	ensembl	58_37k	1	known	silent	c.1200	p.G400	0	superfamily_ARM repeat	superfamily_ARM repeat	0	no_errors	MOC1	564	112	16.57	488	95	16.27	799	141	15	466	2	0.43
1	90132024	90132024	G	T	SNP	ENSMUSG00000079429	ENSMUST00000113130	mouse	ensembl	58_37k	1	known	silent	c.1200	p.G400	0	superfamily_ARM repeat	superfamily_ARM repeat	0	no_errors	MOC22	564	112	16.57	488	95	16.27	799	141	15	466	2	0.43
1	90132024	90132024	G	T	SNP	ENSMUSG00000079429	ENSMUST00000113130	mouse	ensembl	58_37k	1	known	silent	c.1200	p.G400	0	superfamily_ARM repeat	superfamily_ARM repeat	0	no_errors	MOC23	564	112	16.57	488	95	16.27	799	141	15	466	2	0.43
1	90135581	90135581	A	C	SNP	ENSMUSG00000079429	ENSMUST00000113130	mouse	ensembl	58_37k	1	known	missense	c.1658	p.D553A	0	superfamily_ARM repeat	superfamily_ARM repeat	0	no_errors	MOC1	348	286	45.11	363	278	43.37	433	458	51.35	508	5	0.97
1	90135581	90135581	A	C	SNP	ENSMUSG00000079429	ENSMUST00000113130	mouse	ensembl	58_37k	1	known	missense	c.1658	p.D553A	0	superfamily_ARM repeat	superfamily_ARM repeat	0	no_errors	MOC22	348	286	45.11	363	278	43.37	433	458	51.35	508	5	0.97
1	90135581	90135581	A	C	SNP	ENSMUSG00000079429	ENSMUST00000113130	mouse	ensembl	58_37k	1	known	missense	c.1658	p.D553A	0	superfamily_ARM repeat	superfamily_ARM repeat	0	no_errors	MOC23	348	286	45.11	363	278	43.37	433	458	51.35	508	5	0.97
1	90137278	90137278	G	A	SNP	ENSMUSG00000079429	ENSMUST00000113130	mouse	ensembl	58_37k	1	known	missense	c.1759	p.G587R	0	superfamily_ARM repeat	superfamily_ARM repeat	0	no_errors	MOC1	191	78	29	190	70	26.92	233	102	30.45	168	1	0.59
1	90137278	90137278	G	A	SNP	ENSMUSG00000079429	ENSMUST00000113130	mouse	ensembl	58_37k	1	known	missense	c.1759	p.G587R	0	superfamily_ARM repeat	superfamily_ARM repeat	0	no_errors	MOC22	191	78	29	190	70	26.92	233	102	30.45	168	1	0.59
1	90137278	90137278	G	A	SNP	ENSMUSG00000079429	ENSMUST00000113130	mouse	ensembl	58_37k	1	known	missense	c.1759	p.G587R	0	superfamily_ARM repeat	superfamily_ARM repeat	0	no_errors	MOC23	191	78	29	190	70	26.92	233	102	30.45	168	1	0.59
1	90137284	90137284	G	T	SNP	ENSMUSG00000079429	ENSMUST00000113130	mouse	ensembl	58_37k	1	known	missense	c.1765	p.G589C	0	superfamily_ARM repeat	superfamily_ARM repeat	0	no_errors	MOC1	245	37	13.12	230	42	15.44	290	53	15.45	180	0	0
1	90137284	90137284	G	T	SNP	ENSMUSG00000079429	ENSMUST00000113130	mouse	ensembl	58_37k	1	known	missense	c.1765	p.G589C	0	superfamily_ARM repeat	superfamily_ARM repeat	0	no_errors	MOC22	245	37	13.12	230	42	15.44	290	53	15.45	180	0	0
1	90137284	90137284	G	T	SNP	ENSMUSG00000079429	ENSMUST00000113130	mouse	ensembl	58_37k	1	known	missense	c.1765	p.G589C	0	superfamily_ARM repeat	superfamily_ARM repeat	0	no_errors	MOC23	245	37	13.12	230	42	15.44	290	53	15.45	180	0	0
1	90138193	90138193	A	C	SNP	ENSMUSG00000079429	ENSMUST00000113130	mouse	ensembl	58_37k	1	known	missense	c.2005	p.I669L	0	superfamily_ARM repeat	superfamily_ARM repeat	0	no_errors	MOC1	414	50	10.75	318	56	14.97	443	104	19.01	311	0	0
1	90138193	90138193	A	C	SNP	ENSMUSG00000079429	ENSMUST00000113130	mouse	ensembl	58_37k	1	known	missense	c.2005	p.I669L	0	superfamily_ARM repeat	superfamily_ARM repeat	0	no_errors	MOC22	414	50	10.75	318	56	14.97	443	104	19.01	311	0	0
1	90138193	90138193	A	C	SNP	ENSMUSG00000079429	ENSMUST00000113130	mouse	ensembl	58_37k	1	known	missense	c.2005	p.I669L	0	superfamily_ARM repeat	superfamily_ARM repeat	0	no_errors	MOC23	414	50	10.75	318	56	14.97	443	104	19.01	311	0	0
1	90138992	90138992	G	T	SNP	ENSMUSG00000079429	ENSMUST00000113130	mouse	ensembl	58_37k	1	known	missense	c.2051	p.R684M	0	superfamily_ARM repeat	superfamily_ARM repeat	0	no_errors	MOC1	214	96	30.97	220	83	27.39	299	143	32.35	205	0	0
1	90138993	90138993	G	T	SNP	ENSMUSG00000079429	ENSMUST00000113130	mouse	ensembl	58_37k	1	known	missense	c.2052	p.R684S	0	superfamily_ARM repeat	superfamily_ARM repeat	0	no_errors	MOC1	218	97	30.7	218	82	27.24	297	142	32.27	206	0	0
1	90139316	90139316	G	T	SNP	ENSMUSG00000079429	ENSMUST00000113130	mouse	ensembl	58_37k	1	known	nonsense	c.2230	p.E744*	0	superfamily_ARM repeat	superfamily_ARM repeat	0	no_errors	MOC22	544	0	0	363	44	10.81	599	1	0.17	326	3	0.91
1	90139354	90139354	C	T	SNP	ENSMUSG00000079429	ENSMUST00000113130	mouse	ensembl	58_37k	1	known	silent	c.2268	p.I756	0	superfamily_ARM repeat	superfamily_ARM repeat	0	no_errors	MOC1	328	53	13.91	254	46	15.33	401	74	15.58	236	1	0.42
1	90139354	90139354	C	T	SNP	ENSMUSG00000079429	ENSMUST00000113130	mouse	ensembl	58_37k	1	known	silent	c.2268	p.I756	0	superfamily_ARM repeat	superfamily_ARM repeat	0	no_errors	MOC22	328	53	13.91	254	46	15.33	401	74	15.58	236	1	0.42
1	90139354	90139354	C	T	SNP	ENSMUSG00000079429	ENSMUST00000113130	mouse	ensembl	58_37k	1	known	silent	c.2268	p.I756	0	superfamily_ARM repeat	superfamily_ARM repeat	0	no_errors	MOC23	328	53	13.91	254	46	15.33	401	74	15.58	236	1	0.42
1	90140658	90140658	G	A	SNP	ENSMUSG00000079429	ENSMUST00000113130	mouse	ensembl	58_37k	1	known	silent	c.2433	p.Q811	0	superfamily_ARM repeat	superfamily_ARM repeat	0	no_errors	MOC1	697	161	18.76	691	122	15.01	1038	229	18.06	701	0	0
1	90140658	90140658	G	A	SNP	ENSMUSG00000079429	ENSMUST00000113130	mouse	ensembl	58_37k	1	known	silent	c.2433	p.Q811	0	superfamily_ARM repeat	superfamily_ARM repeat	0	no_errors	MOC22	697	161	18.76	691	122	15.01	1038	229	18.06	701	0	0
1	90140658	90140658	G	A	SNP	ENSMUSG00000079429	ENSMUST00000113130	mouse	ensembl	58_37k	1	known	silent	c.2433	p.Q811	0	superfamily_ARM repeat	superfamily_ARM repeat	0	no_errors	MOC23	697	161	18.76	691	122	15.01	1038	229	18.06	701	0	0
1	90141545	90141545	G	T	SNP	ENSMUSG00000079429	ENSMUST00000113130	mouse	ensembl	58_37k	1	known	missense	c.2460	p.M820I	0	superfamily_ARM repeat	superfamily_ARM repeat	0	no_errors	MOC1	357	169	32.13	344	140	28.93	466	205	30.55	387	3	0.77
1	90141545	90141545	G	T	SNP	ENSMUSG00000079429	ENSMUST00000113130	mouse	ensembl	58_37k	1	known	missense	c.2460	p.M820I	0	superfamily_ARM repeat	superfamily_ARM repeat	0	no_errors	MOC22	357	169	32.13	344	140	28.93	466	205	30.55	387	3	0.77
1	90141545	90141545	G	T	SNP	ENSMUSG00000079429	ENSMUST00000113130	mouse	ensembl	58_37k	1	known	missense	c.2460	p.M820I	0	superfamily_ARM repeat	superfamily_ARM repeat	0	no_errors	MOC23	357	169	32.13	344	140	28.93	466	205	30.55	387	3	0.77
1	90141570	90141570	G	T	SNP	ENSMUSG00000079429	ENSMUST00000113130	mouse	ensembl	58_37k	1	known	missense	c.2485	p.A829S	0	superfamily_ARM repeat	superfamily_ARM repeat	0	no_errors	MOC1	577	101	14.87	483	79	14.06	672	155	18.72	434	3	0.69
1	90141570	90141570	G	T	SNP	ENSMUSG00000079429	ENSMUST00000113130	mouse	ensembl	58_37k	1	known	missense	c.2485	p.A829S	0	superfamily_ARM repeat	superfamily_ARM repeat	0	no_errors	MOC22	577	101	14.87	483	79	14.06	672	155	18.72	434	3	0.69
1	90141570	90141570	G	T	SNP	ENSMUSG00000079429	ENSMUST00000113130	mouse	ensembl	58_37k	1	known	missense	c.2485	p.A829S	0	superfamily_ARM repeat	superfamily_ARM repeat	0	no_errors	MOC23	577	101	14.87	483	79	14.06	672	155	18.72	434	3	0.69
1	90143714	90143714	G	A	SNP	ENSMUSG00000079429	ENSMUST00000113130	mouse	ensembl	58_37k	1	known	silent	c.2640	p.T880	0	superfamily_ARM repeat	superfamily_ARM repeat	0	no_errors	MOC1	566	191	25.23	523	203	27.92	764	362	32.15	659	2	0.3
1	90143714	90143714	G	A	SNP	ENSMUSG00000079429	ENSMUST00000113130	mouse	ensembl	58_37k	1	known	silent	c.2640	p.T880	0	superfamily_ARM repeat	superfamily_ARM repeat	0	no_errors	MOC22	566	191	25.23	523	203	27.92	764	362	32.15	659	2	0.3
1	90143714	90143714	G	A	SNP	ENSMUSG00000079429	ENSMUST00000113130	mouse	ensembl	58_37k	1	known	silent	c.2640	p.T880	0	superfamily_ARM repeat	superfamily_ARM repeat	0	no_errors	MOC23	566	191	25.23	523	203	27.92	764	362	32.15	659	2	0.3
1	90145130	90145130	C	A	SNP	ENSMUSG00000079429	ENSMUST00000113130	mouse	ensembl	58_37k	1	known	missense	c.2845	p.L949M	0	superfamily_ARM repeat	superfamily_ARM repeat	0	no_errors	MOC23	163	83	33.74	157	77	32.91	203	84	29.27	154	0	0
1	90152208	90152208	G	A	SNP	ENSMUSG00000079429	ENSMUST00000113130	mouse	ensembl	58_37k	1	known	silent	c.3942	p.L1314	0	superfamily_ARM repeat	superfamily_ARM repeat	0	no_errors	MOC1	420	79	15.77	400	71	15.07	565	91	13.87	350	3	0.85
1	90152208	90152208	G	A	SNP	ENSMUSG00000079429	ENSMUST00000113130	mouse	ensembl	58_37k	1	known	silent	c.3942	p.L1314	0	superfamily_ARM repeat	superfamily_ARM repeat	0	no_errors	MOC22	420	79	15.77	400	71	15.07	565	91	13.87	350	3	0.85
1	90152702	90152702	G	A	SNP	ENSMUSG00000079429	ENSMUST00000113130	mouse	ensembl	58_37k	1	known	missense	c.4060	p.E1354K	0	superfamily_ARM repeat	superfamily_ARM repeat	0	no_errors	MOC1	385	152	28.31	345	127	26.91	465	232	33.24	415	0	0
1	90152702	90152702	G	A	SNP	ENSMUSG00000079429	ENSMUST00000113130	mouse	ensembl	58_37k	1	known	missense	c.4060	p.E1354K	0	superfamily_ARM repeat	superfamily_ARM repeat	0	no_errors	MOC22	385	152	28.31	345	127	26.91	465	232	33.24	415	0	0
1	90153120	90153120	G	A	SNP	ENSMUSG00000079429	ENSMUST00000113130	mouse	ensembl	58_37k	1	known	missense	c.4250	p.R1417Q	0	superfamily_ARM repeat	superfamily_ARM repeat	0	no_errors	MOC1	526	74	12.33	470	78	14.23	682	140	17.01	391	1	0.26
1	90153120	90153120	G	A	SNP	ENSMUSG00000079429	ENSMUST00000113130	mouse	ensembl	58_37k	1	known	missense	c.4250	p.R1417Q	0	superfamily_ARM repeat	superfamily_ARM repeat	0	no_errors	MOC22	526	74	12.33	470	78	14.23	682	140	17.01	391	1	0.26
1	90153120	90153120	G	A	SNP	ENSMUSG00000079429	ENSMUST00000113130	mouse	ensembl	58_37k	1	known	missense	c.4250	p.R1417Q	0	superfamily_ARM repeat	superfamily_ARM repeat	0	no_errors	MOC23	526	74	12.33	470	78	14.23	682	140	17.01	391	1	0.26
1	90153302	90153302	C	T	SNP	ENSMUSG00000079429	ENSMUST00000113130	mouse	ensembl	58_37k	1	known	missense	c.4331	p.A1444V	0	superfamily_ARM repeat	superfamily_ARM repeat	0	no_errors	MOC1	178	90	33.58	183	79	30.15	225	106	32.02	184	1	0.53
1	90153302	90153302	C	T	SNP	ENSMUSG00000079429	ENSMUST00000113130	mouse	ensembl	58_37k	1	known	missense	c.4331	p.A1444V	0	superfamily_ARM repeat	superfamily_ARM repeat	0	no_errors	MOC23	178	90	33.58	183	79	30.15	225	106	32.02	184	1	0.53
1	90153329	90153329	T	C	SNP	ENSMUSG00000079429	ENSMUST00000113130	mouse	ensembl	58_37k	1	known	missense	c.4358	p.V1453A	0	superfamily_ARM repeat	superfamily_ARM repeat	0	no_errors	MOC1	256	30	10.49	235	30	11.24	281	55	16.32	204	0	0
1	90153329	90153329	T	C	SNP	ENSMUSG00000079429	ENSMUST00000113130	mouse	ensembl	58_37k	1	known	missense	c.4358	p.V1453A	0	superfamily_ARM repeat	superfamily_ARM repeat	0	no_errors	MOC22	256	30	10.49	235	30	11.24	281	55	16.32	204	0	0
1	90153329	90153329	T	C	SNP	ENSMUSG00000079429	ENSMUST00000113130	mouse	ensembl	58_37k	1	known	missense	c.4358	p.V1453A	0	superfamily_ARM repeat	superfamily_ARM repeat	0	no_errors	MOC23	256	30	10.49	235	30	11.24	281	55	16.32	204	0	0
1	90155239	90155239	A	G	SNP	ENSMUSG00000079429	ENSMUST00000113130	mouse	ensembl	58_37k	1	known	missense	c.4675	p.S1559G	0	NULL	superfamily_ARM repeat	0	no_errors	MOC1	689	83	10.75	623	109	14.89	871	139	13.76	536	1	0.19
1	90155239	90155239	A	G	SNP	ENSMUSG00000079429	ENSMUST00000113130	mouse	ensembl	58_37k	1	known	missense	c.4675	p.S1559G	0	NULL	superfamily_ARM repeat	0	no_errors	MOC22	689	83	10.75	623	109	14.89	871	139	13.76	536	1	0.19
1	90155239	90155239	A	G	SNP	ENSMUSG00000079429	ENSMUST00000113130	mouse	ensembl	58_37k	1	known	missense	c.4675	p.S1559G	0	NULL	superfamily_ARM repeat	0	no_errors	MOC23	689	83	10.75	623	109	14.89	871	139	13.76	536	1	0.19
1	90161760	90161760	G	A	SNP	Hjurp	NM_198652.2	mouse	genbank	58_37k	-1	validated	missense	c.2000	p.P667L	0	NULL	NULL	0	no_errors	MOC1	171	40	18.96	154	30	16.22	254	59	18.85	103	1	0.96
1	90161760	90161760	G	A	SNP	Hjurp	NM_198652.2	mouse	genbank	58_37k	-1	validated	missense	c.2000	p.P667L	0	NULL	NULL	0	no_errors	MOC22	171	40	18.96	154	30	16.22	254	59	18.85	103	1	0.96
1	90161760	90161760	G	A	SNP	Hjurp	NM_198652.2	mouse	genbank	58_37k	-1	validated	missense	c.2000	p.P667L	0	NULL	NULL	0	no_errors	MOC23	171	40	18.96	154	30	16.22	254	59	18.85	103	1	0.96
1	90162047	90162047	C	T	SNP	Hjurp	NM_198652.2	mouse	genbank	58_37k	-1	validated	silent	c.1713	p.A571	0	NULL	NULL	0	no_errors	MOC1	206	87	29.59	235	109	31.69	321	166	34.09	179	0	0
1	90162047	90162047	C	T	SNP	Hjurp	NM_198652.2	mouse	genbank	58_37k	-1	validated	silent	c.1713	p.A571	0	NULL	NULL	0	no_errors	MOC22	206	87	29.59	235	109	31.69	321	166	34.09	179	0	0
1	90162047	90162047	C	T	SNP	Hjurp	NM_198652.2	mouse	genbank	58_37k	-1	validated	silent	c.1713	p.A571	0	NULL	NULL	0	no_errors	MOC23	206	87	29.59	235	109	31.69	321	166	34.09	179	0	0
1	90162421	90162421	A	C	SNP	Hjurp	NM_198652.2	mouse	genbank	58_37k	-1	validated	missense	c.1339	p.S447A	0	NULL	NULL	0	no_errors	MOC1	519	228	30.48	488	212	30.29	644	341	34.62	485	2	0.41
1	90162421	90162421	A	C	SNP	Hjurp	NM_198652.2	mouse	genbank	58_37k	-1	validated	missense	c.1339	p.S447A	0	NULL	NULL	0	no_errors	MOC22	519	228	30.48	488	212	30.29	644	341	34.62	485	2	0.41
1	90162421	90162421	A	C	SNP	Hjurp	NM_198652.2	mouse	genbank	58_37k	-1	validated	missense	c.1339	p.S447A	0	NULL	NULL	0	no_errors	MOC23	519	228	30.48	488	212	30.29	644	341	34.62	485	2	0.41
1	90162467	90162467	C	G	SNP	Hjurp	NM_198652.2	mouse	genbank	58_37k	-1	validated	silent	c.1293	p.L431	0	NULL	NULL	0	no_errors	MOC1	582	91	13.48	543	90	14.2	823	154	15.75	466	1	0.21
1	90162467	90162467	C	G	SNP	Hjurp	NM_198652.2	mouse	genbank	58_37k	-1	validated	silent	c.1293	p.L431	0	NULL	NULL	0	no_errors	MOC22	582	91	13.48	543	90	14.2	823	154	15.75	466	1	0.21
1	90162467	90162467	C	G	SNP	Hjurp	NM_198652.2	mouse	genbank	58_37k	-1	validated	silent	c.1293	p.L431	0	NULL	NULL	0	no_errors	MOC23	582	91	13.48	543	90	14.2	823	154	15.75	466	1	0.21
1	90162770	90162770	G	A	SNP	Hjurp	NM_198652.2	mouse	genbank	58_37k	-1	validated	silent	c.990	p.H330	0	NULL	NULL	0	no_errors	MOC1	608	288	32.14	574	232	28.78	796	389	32.77	640	2	0.31
1	90162770	90162770	G	A	SNP	Hjurp	NM_198652.2	mouse	genbank	58_37k	-1	validated	silent	c.990	p.H330	0	NULL	NULL	0	no_errors	MOC22	608	288	32.14	574	232	28.78	796	389	32.77	640	2	0.31
1	90162770	90162770	G	A	SNP	Hjurp	NM_198652.2	mouse	genbank	58_37k	-1	validated	silent	c.990	p.H330	0	NULL	NULL	0	no_errors	MOC23	608	288	32.14	574	232	28.78	796	389	32.77	640	2	0.31
1	90165906	90165906	T	C	SNP	Hjurp	NM_198652.2	mouse	genbank	58_37k	-1	validated	missense	c.437	p.E146G	0	NULL	NULL	0	no_errors	MOC1	404	243	37.56	407	265	39.43	650	365	35.96	359	7	1.91
1	90165906	90165906	T	C	SNP	Hjurp	NM_198652.2	mouse	genbank	58_37k	-1	validated	missense	c.437	p.E146G	0	NULL	NULL	0	no_errors	MOC22	404	243	37.56	407	265	39.43	650	365	35.96	359	7	1.91
1	90165906	90165906	T	C	SNP	Hjurp	NM_198652.2	mouse	genbank	58_37k	-1	validated	missense	c.437	p.E146G	0	NULL	NULL	0	no_errors	MOC23	404	243	37.56	407	265	39.43	650	365	35.96	359	7	1.91
1	90224798	90224798	C	G	SNP	Trpm8	NM_134252.3	mouse	genbank	58_37k	1	validated	missense	c.599	p.T200S	0	NULL	HMMPfam_Ion_trans	0	no_errors	MOC1	19	64	77.11	81	0	0	118	0	0	134	0	0
1	90237917	90237917	T	A	SNP	Trpm8	NM_134252.3	mouse	genbank	58_37k	1	validated	missense	c.1178	p.V393E	0	NULL	HMMPfam_Ion_trans	0	no_errors	MOC1	52	14	21.21	54	0	0	51	0	0	54	0	0
1	90244769	90244769	G	T	SNP	Trpm8	NM_134252.3	mouse	genbank	58_37k	1	validated	missense	c.1513	p.V505L	0	NULL	HMMPfam_Ion_trans	0	no_errors	MOC22	207	0	0	136	55	28.8	287	0	0	282	0	0
1	91040331	91040331	G	C	SNP	Sh3bp4	NM_133816.2	mouse	genbank	58_37k	1	provisional	missense	c.325	p.V109L	0	HMMPfam_SH3_1,HMMSmart_SH3,superfamily_SH3	HMMPfam_SH3_1,HMMSmart_SH3,superfamily_SH3,HMMPfam_SH3_2	0	no_errors	MOC23	80	0	0	71	0	0	32	63	66.32	107	0	0
1	92036555	92036555	A	T	SNP	Iqca	ENSMUST00000113094	mouse	ensembl	58_37k	-1	known	missense	c.548	p.M183K	0	NULL	HMMSmart_SM00382,HMMPfam_AAA,superfamily_P-loop containing nucleoside triphosphate hydrolases	0	no_errors	MOC22	69	0	0	42	18	30	85	0	0	68	0	0
1	92699014	92699014	T	A	SNP	Col6a3	ENSMUST00000097653	mouse	ensembl	58_37k	-1	known	missense	c.3325	p.T1109S	0	HMMPfam_VWA,HMMSmart_SM00327,superfamily_vWA-like	HMMPfam_VWA,HMMSmart_SM00327,HMMPfam_Kunitz_BPTI,HMMSmart_SM00131,PatternScan_BPTI_KUNITZ_1,superfamily_BPTI-like,HMMPfam_fn3,HMMPfam_Collagen,superfamily_Fibronectin type III,PatternScan_DNA_LIGASE_A1,superfamily_vWA-like	0	no_errors	MOC1	69	13	15.85	85	0	0	100	0	0	115	0	0
1	92699078	92699078	A	T	SNP	Col6a3	ENSMUST00000097653	mouse	ensembl	58_37k	-1	known	silent	c.3261	p.S1087	0	HMMPfam_VWA,HMMSmart_SM00327,superfamily_vWA-like	HMMPfam_VWA,HMMSmart_SM00327,HMMPfam_Kunitz_BPTI,HMMSmart_SM00131,PatternScan_BPTI_KUNITZ_1,superfamily_BPTI-like,HMMPfam_fn3,HMMPfam_Collagen,superfamily_Fibronectin type III,PatternScan_DNA_LIGASE_A1,superfamily_vWA-like	0	no_errors	MOC22	74	0	0	28	25	47.17	88	0	0	81	1	1.22
1	92699162	92699162	G	T	SNP	Col6a3	ENSMUST00000097653	mouse	ensembl	58_37k	-1	known	silent	c.3177	p.V1059	0	HMMPfam_VWA,HMMSmart_SM00327,superfamily_vWA-like	HMMPfam_VWA,HMMSmart_SM00327,HMMPfam_Kunitz_BPTI,HMMSmart_SM00131,PatternScan_BPTI_KUNITZ_1,superfamily_BPTI-like,HMMPfam_fn3,HMMPfam_Collagen,superfamily_Fibronectin type III,PatternScan_DNA_LIGASE_A1,superfamily_vWA-like	0	no_errors	MOC23	47	0	0	39	0	0	44	10	18.52	42	0	0
1	92718947	92718947	A	G	SNP	Col6a3	ENSMUST00000066153	mouse	ensembl	58_37k	-1	known	silent	c.741	p.D247	0	HMMPfam_VWA,HMMSmart_SM00327,superfamily_vWA-like	HMMPfam_VWA,HMMSmart_SM00327,PatternScan_DNA_LIGASE_A1,superfamily_vWA-like	0	no_stop_codon	MOC22	82	0	0	36	24	40	88	1	1.12	65	0	0
1	92856577	92856577	A	C	SNP	Rab17	NM_008998.4	mouse	genbank	58_37k	-1	validated	splice_site	c.435+2	e3+2	0	0	0	0	no_errors	MOC23	176	1	0.56	166	1	0.6	65	125	65.45	177	0	0
1	93011913	93011913	G	A	SNP	Lrrfip1	ENSMUST00000097649	mouse	ensembl	58_37k	1	known	missense	c.1462	p.G488R	0	HMMPfam_DUF2051	HMMPfam_DUF2051	0	no_errors	MOC1	3	9	75	23	0	0	25	0	0	21	0	0
1	93063474	93063474	T	A	SNP	Rbm44	NM_001033408.4	mouse	genbank	58_37k	1	provisional	missense	c.2585	p.L862H	0	superfamily_SSF54928	HMMPfam_RRM_1,HMMSmart_RRM,superfamily_SSF54928	0	no_errors	MOC1	94	13	12.15	90	0	0	121	0	0	93	0	0
1	93181928	93181928	G	A	SNP	Ube2f	NM_026454.3	mouse	genbank	58_37k	1	provisional	missense	c.554	p.R185K	0	HMMSmart_UBCc	HMMPfam_UQ_con,HMMSmart_UBCc,PatternScan_UBIQUITIN_CONJUGAT_1,superfamily_UBQ-conjugat/RWD-like	0	no_errors	MOC22	235	0	0	80	143	64.13	340	0	0	316	0	0
1	93192689	93192689	G	C	SNP	LOC665783	XR_032669.1	mouse	genbank	58_37k	1	model	rna	NULL	NULL	0	0	0	0	pseudogene	MOC23	71	1	1.39	70	0	0	18	60	76.92	86	1	1.15
1	93238495	93238495	G	T	SNP	Espnl	NM_001033292.3	mouse	genbank	58_37k	1	provisional	missense	c.1175	p.R392M	0	NULL	HMMPfam_Ank,HMMSmart_ANK,superfamily_ANK	0	no_errors	MOC22	148	0	0	38	84	68.85	185	1	0.54	173	0	0
1	93242281	93242281	A	T	SNP	Espnl	NM_001033292.3	mouse	genbank	58_37k	1	provisional	missense	c.2785	p.S929C	0	NULL	HMMPfam_Ank,HMMSmart_ANK,superfamily_ANK	0	no_errors	MOC1	6	48	88.89	40	0	0	65	0	0	65	0	0
1	93253909	93253909	A	C	SNP	Klhl30	NM_027551.2	mouse	genbank	58_37k	1	provisional	splice_site	c.911-2	e3-2	0	0	0	0	no_errors	MOC23	186	0	0	194	2	1.02	63	135	68.18	251	0	0
1	93330008	93330008	T	A	SNP	Per2	NM_011066.3	mouse	genbank	58_37k	-1	validated	missense	c.1501	p.S501C	0	NULL	HMMSmart_SM00091,HMMPfam_PAS_3,superfamily_PYP-like sensor domain (PAS domain)	0	no_errors	MOC23	169	0	0	161	0	0	52	151	74.38	230	1	0.43
1	93347360	93347360	T	A	SNP	Per2	NM_011066.3	mouse	genbank	58_37k	-1	validated	missense	c.43	p.T15S	0	NULL	HMMSmart_SM00091,HMMPfam_PAS_3,superfamily_PYP-like sensor domain (PAS domain)	0	no_errors	MOC23	311	1	0.32	298	2	0.67	326	93	22.2	525	0	0
1	93424320	93424320	A	T	SNP	Traf3ip1	NM_028718.2	mouse	genbank	58_37k	1	validated	missense	c.1838	p.Q613L	0	HMMPfam_MIP-T3	HMMPfam_MIP-T3	0	no_errors	MOC1	4	41	91.11	37	0	0	42	0	0	49	0	0
1	94407744	94407744	G	A	SNP	Olfr1414	NM_147039.2	mouse	genbank	58_37k	-1	validated	missense	c.860	p.P287L	0	HMMPfam_7tm_1,superfamily_SSF81321	HMMPfam_7tm_1,PatternScan_G_PROTEIN_RECEP_F1_1,superfamily_SSF81321	0	no_errors	MOC23	136	0	0	113	0	0	53	112	67.88	163	0	0
1	94470447	94470447	T	A	SNP	Olfr1413	NM_147037.2	mouse	genbank	58_37k	1	validated	missense	c.698	p.L233H	0	HMMPfam_7tm_1,superfamily_SSF81321	HMMPfam_7tm_1,PatternScan_G_PROTEIN_RECEP_F1_1,superfamily_SSF81321	0	no_errors	MOC22	226	0	0	131	56	29.95	307	0	0	267	0	0
1	94485584	94485584	T	A	SNP	Olfr1412	NM_146277.1	mouse	genbank	58_37k	1	validated	missense	c.676	p.Y226N	0	HMMPfam_7tm_1,superfamily_SSF81321	HMMPfam_7tm_1,PatternScan_G_PROTEIN_RECEP_F1_1,superfamily_SSF81321	0	no_errors	MOC23	311	0	0	267	0	0	290	124	29.95	411	0	0
1	94778443	94778443	A	C	SNP	Ankmy1	NM_172850.3	mouse	genbank	58_37k	-1	validated	missense	c.1661	p.I554S	0	HMMPfam_Ank,HMMSmart_ANK,superfamily_ANK	HMMPfam_Ank,HMMSmart_ANK,superfamily_ANK,HMMPfam_zf-MYND,PatternScan_ZF_MYND_1,HMMPfam_MORN,HMMSmart_MORN,superfamily_SSF82185	0	no_errors	MOC22	119	1	0.83	60	20	25	105	0	0	113	0	0
1	94785031	94785031	T	A	SNP	Ankmy1	NM_172850.3	mouse	genbank	58_37k	-1	validated	nonsense	c.649	p.K217*	0	superfamily_ANK	HMMPfam_Ank,HMMSmart_ANK,superfamily_ANK,HMMPfam_zf-MYND,PatternScan_ZF_MYND_1,HMMPfam_MORN,HMMSmart_MORN,superfamily_SSF82185	0	no_errors	MOC23	59	0	0	70	0	0	74	32	30.19	79	0	0
1	94792741	94792741	A	C	SNP	Ankmy1	NM_172850.3	mouse	genbank	58_37k	-1	validated	missense	c.91	p.Y31D	0	HMMPfam_MORN,HMMSmart_MORN,superfamily_SSF82185	HMMPfam_Ank,HMMSmart_ANK,superfamily_ANK,HMMPfam_zf-MYND,PatternScan_ZF_MYND_1,HMMPfam_MORN,HMMSmart_MORN,superfamily_SSF82185	0	no_errors	MOC1	113	22	16.3	106	0	0	164	0	0	142	0	0
1	94869777	94869777	G	T	SNP	Gpr35	ENSMUST00000027489	mouse	ensembl	58_37k	1	known	silent	c.78	p.G26	0	NULL	HMMPfam_7tm_1,superfamily_SSF81321	0	no_errors	MOC23	41	0	0	38	0	0	12	47	79.66	49	0	0
1	94879692	94879692	T	A	SNP	Gpr35	NM_022320.4	mouse	genbank	58_37k	1	validated	missense	c.548	p.L183Q	0	HMMPfam_7tm_1,superfamily_Family A G protein-coupled receptor-like	HMMPfam_7tm_1,PatternScan_G_PROTEIN_RECEP_F1_1,superfamily_Family A G protein-coupled receptor-like	0	no_errors	MOC1	85	14	14	95	0	0	129	0	0	110	0	0
1	94915574	94915574	T	C	SNP	Kif1a	NM_008440.3	mouse	genbank	58_37k	-1	validated	missense	c.5006	p.H1669R	0	HMMPfam_PH,HMMSmart_SM00233,superfamily_PH domain-like	HMMPfam_FHA,HMMSmart_SM00240,HMMPfam_Kinesin,HMMSmart_SM00129,HMMPfam_PH,HMMSmart_SM00233,superfamily_SMAD/FHA domain,PatternScan_KINESIN_MOTOR_DOMAIN1,superfamily_PH domain-like,superfamily_P-loop containing nucleoside triphosphate hydrolases	0	no_errors	MOC1	144	19	11.59	156	0	0	230	0	0	238	2	0.83
1	95037942	95037942	C	A	SNP	Agxt	NM_016702.2	mouse	genbank	58_37k	1	validated	silent	c.798	p.I266	0	HMMPfam_Aminotran_5,superfamily_PyrdxlP-dep_Trfase_major	HMMPfam_Aminotran_5,superfamily_PyrdxlP-dep_Trfase_major,PatternScan_AA_TRANSFER_CLASS_5	0	no_errors	MOC23	120	0	0	73	0	0	39	82	67.77	116	1	0.85
1	95056467	95056467	T	A	SNP	2310007B03Rik	NM_172411.4	mouse	genbank	58_37k	-1	validated	silent	c.240	p.S80	0	NULL	NULL	0	no_errors	MOC22	39	0	0	16	25	60.98	66	1	1.49	74	0	0
1	95257360	95257360	A	T	SNP	Ppp1r7	NM_023200.2	mouse	genbank	58_37k	1	provisional	missense	c.880	p.S294C	0	HMMPfam_LRR_1,superfamily_SSF52058	HMMPfam_LRR_1,HMMSmart_LRRcap,superfamily_SSF52058	0	no_errors	MOC22	66	0	0	46	13	22.03	82	0	0	74	0	0
1	95456845	95456845	A	T	SNP	Farp2	NM_145519.2	mouse	genbank	58_37k	1	validated	missense	c.216	p.Q72H	0	HMMPfam_FERM_N,HMMSmart_SM00295,superfamily_Ubiquitin-like	HMMPfam_RhoGEF,HMMSmart_SM00325,superfamily_DBL homology domain (DH-domain),HMMPfam_PH,HMMSmart_SM00233,HMMPfam_FA,HMMPfam_FERM_N,HMMPfam_FERM_C,PatternScan_FERM_1,HMMPfam_FERM_M,superfamily_Second domain of FERM,HMMSmart_SM00295,superfamily_PH domain-like,superfamily_Ubiquitin-like	0	no_errors	MOC1	75	11	12.79	66	0	0	65	0	0	83	0	0
1	95509700	95509700	A	T	SNP	Farp2	NM_145519.2	mouse	genbank	58_37k	1	validated	silent	c.2346	p.S782	0	HMMPfam_PH,HMMSmart_SM00233,superfamily_PH domain-like	HMMPfam_RhoGEF,HMMSmart_SM00325,superfamily_DBL homology domain (DH-domain),HMMPfam_PH,HMMSmart_SM00233,HMMPfam_FA,HMMPfam_FERM_N,HMMPfam_FERM_C,PatternScan_FERM_1,HMMPfam_FERM_M,superfamily_Second domain of FERM,HMMSmart_SM00295,superfamily_PH domain-like,superfamily_Ubiquitin-like	0	no_errors	MOC1	23	70	75.27	101	0	0	118	1	0.84	135	0	0
1	95722881	95722881	A	T	SNP	D2hgdh	ENSMUST00000112881	mouse	ensembl	58_37k	1	known	missense	c.64	p.T22S	0	NULL	HMMPfam_FAD-oxidase_C,HMMPfam_FAD_binding_4,superfamily_FAD-linked oxidases C-terminal domain,superfamily_FAD-binding domain	0	no_errors	MOC22	59	0	0	22	28	56	70	1	1.39	81	0	0
1	95723171	95723171	A	G	SNP	D2hgdh	NM_178882.3	mouse	genbank	58_37k	1	validated	silent	c.288	p.P96	0	superfamily_FAD-binding domain	HMMPfam_FAD-oxidase_C,HMMPfam_FAD_binding_4,superfamily_FAD-linked oxidases C-terminal domain,superfamily_FAD-binding domain	0	no_errors	MOC22	110	0	0	69	34	33.01	169	1	0.59	139	0	0
1	95835169	95835169	G	C	SNP	ENSMUSG00000056307	ENSMUST00000069881	mouse	ensembl	58_37k	1	known	missense	c.14	p.R5P	0	HMMPfam_Gal-3-0_sulfotr	HMMPfam_Gal-3-0_sulfotr	0	no_errors	MOC23	124	0	0	100	0	0	50	103	67.32	175	0	0
1	95835186	95835186	T	A	SNP	LOC100041596	XM_001477518.1	mouse	genbank	58_37k	1	model	missense	c.31	p.F11I	0	HMMPfam_Gal-3-0_sulfotr	HMMPfam_Gal-3-0_sulfotr	0	no_errors	MOC22	127	0	0	73	28	27.72	148	0	0	170	1	0.58
1	95835241	95835241	T	A	SNP	LOC100041596	XM_001477518.1	mouse	genbank	58_37k	1	model	missense	c.86	p.L29Q	0	HMMPfam_Gal-3-0_sulfotr	HMMPfam_Gal-3-0_sulfotr	0	no_errors	MOC23	102	0	0	94	0	0	96	24	20	150	0	0
1	95837397	95837397	A	C	SNP	LOC100041596	XM_001477518.1	mouse	genbank	58_37k	1	model	missense	c.772	p.S258R	0	HMMPfam_Gal-3-0_sulfotr	HMMPfam_Gal-3-0_sulfotr	0	no_errors	MOC1	35	6	14.63	45	0	0	48	0	0	50	0	0
1	96365456	96365456	G	T	SNP	LOC666025	XR_033301.1	mouse	genbank	58_37k	-1	model	rna	NULL	NULL	0	0	0	0	pseudogene	MOC22	92	0	0	36	92	71.88	194	0	0	171	1	0.58
1	97221742	97221742	A	G	SNP	Fam174a	NM_026321.4	mouse	genbank	58_37k	1	validated	missense	c.491	p.E164G	0	HMMPfam_DUF1180	HMMPfam_DUF1180	0	no_errors	MOC22	49	0	0	27	15	35.71	49	0	0	46	0	0
1	98717877	98717877	T	A	SNP	Slco4c1	NM_172658.3	mouse	genbank	58_37k	-1	provisional	missense	c.1891	p.I631L	0	HMMPfam_OATP,superfamily_MFS_gen_substrate_transporter	HMMSmart_KAZAL,HMMPfam_OATP,HMMPfam_Kazal_2,superfamily_MFS_gen_substrate_transporter,superfamily_SSF100895	0	no_errors	MOC23	57	0	0	65	0	0	20	37	64.91	75	0	0
1	98735796	98735796	T	C	SNP	Slco4c1	NM_172658.3	mouse	genbank	58_37k	-1	provisional	missense	c.1073	p.H358R	0	HMMPfam_OATP,superfamily_MFS_gen_substrate_transporter	HMMSmart_KAZAL,HMMPfam_OATP,HMMPfam_Kazal_2,superfamily_MFS_gen_substrate_transporter,superfamily_SSF100895	0	no_errors	MOC23	67	0	0	57	1	1.72	25	50	66.67	99	2	1.98
1	98764426	98764426	A	T	SNP	Slco4c1	NM_172658.3	mouse	genbank	58_37k	-1	provisional	missense	c.483	p.F161L	0	HMMPfam_OATP,superfamily_MFS_gen_substrate_transporter	HMMSmart_KAZAL,HMMPfam_OATP,HMMPfam_Kazal_2,superfamily_MFS_gen_substrate_transporter,superfamily_SSF100895	0	no_errors	MOC22	49	0	0	28	35	55.56	81	0	0	85	1	1.16
1	98894002	98894002	T	A	SNP	Slco6b1	NM_001039475.1	mouse	genbank	58_37k	-1	validated	missense	c.58	p.T20S	0	superfamily_MFS general substrate transporter	HMMPfam_OATP,HMMPfam_Kazal_2,superfamily_MFS general substrate transporter,superfamily_Kazal-type serine protease inhibitors	0	no_errors	MOC22	160	1	0.61	129	47	26.7	237	2	0.83	280	1	0.35
1	98962726	98962726	A	C	SNP	Slco6c1	NM_028942.4	mouse	genbank	58_37k	-1	provisional	missense	c.1868	p.L623W	0	HMMPfam_OATP,superfamily_MFS_gen_substrate_transporter	HMMPfam_OATP,HMMPfam_Kazal_2,superfamily_MFS_gen_substrate_transporter,superfamily_SSF100895	0	no_errors	MOC23	84	1	1.18	105	0	0	45	82	64.57	154	1	0.65
1	99681477	99681477	G	C	SNP	Gin1	NM_026250.2	mouse	genbank	58_37k	1	validated	missense	c.787	p.E263Q	0	HMMPfam_rve,superfamily_Ribonuclease H-like	HMMPfam_rve,superfamily_Ribonuclease H-like	0	no_errors	MOC23	144	0	0	110	0	0	42	88	67.69	176	0	0
1	100319916	100319916	A	T	SNP	Slco6d1	ENSMUST00000027575	mouse	ensembl	58_37k	1	known	silent	c.543	p.V181	0	HMMPfam_OATP,superfamily_MFS_gen_substrate_transporter	HMMSmart_KAZAL,HMMPfam_OATP,HMMPfam_Kazal_2,superfamily_MFS_gen_substrate_transporter,superfamily_SSF100895	0	no_errors	MOC1	34	8	19.05	28	0	0	50	0	0	37	0	0
1	100355407	100355407	A	C	SNP	LOC100041868	XM_001477834.1	mouse	genbank	58_37k	1	model	missense	c.871	p.K291Q	0	HMMSmart_SM00219,HMMSmart_SM00220,superfamily_Protein kinase-like (PK-like),HMMPfam_Pkinase	HMMSmart_SM00219,HMMSmart_SM00220,PatternScan_PROTEIN_KINASE_ST,superfamily_Protein kinase-like (PK-like),PatternScan_PROTEIN_KINASE_ATP,HMMPfam_Pkinase,HMMPfam_Pkinase_C	0	pseudogene	MOC23	118	0	0	114	0	0	50	119	70.41	175	0	0
1	102151692	102151692	T	A	SNP	Cntnap5b	NM_172851.2	mouse	genbank	58_37k	1	validated	missense	c.1810	p.F604I	0	superfamily_Fibrinogen C-terminal domain-like,superfamily_Concanavalin A-like lectins/glucanases	HMMPfam_F5_F8_type_C,HMMSmart_SM00231,PatternScan_FA58C_1,PatternScan_FA58C_2,HMMSmart_SM00282,superfamily_Fibrinogen C-terminal domain-like,HMMPfam_EGF,HMMSmart_SM00181,superfamily_Galactose-binding domain-like,superfamily_Concanavalin A-like lectins/glucanases,HMMPfam_Laminin_G_2,PatternScan_GLYCO_HORMONE_BETA_1	0	no_errors	MOC22	74	0	0	19	43	69.35	83	0	0	99	0	0
1	104003028	104003028	T	A	SNP	ENSMUSG00000077295	ENSMUST00000104107	mouse	ensembl	58_37k	-1	known	rna	NULL	NULL	0	0	0	0	no_errors	MOC22	13	0	0	4	13	76.47	16	0	0	29	0	0
1	106850600	106850600	T	A	SNP	Cdh20	NM_011800.4	mouse	genbank	58_37k	1	provisional	silent	c.1212	p.I404	0	HMMPfam_Cadherin,superfamily_Cadherin	HMMPfam_Cadherin_C,HMMPfam_Cadherin,HMMSmart_CA,PatternScan_CADHERIN_1,superfamily_Cadherin	0	no_errors	MOC23	114	0	0	90	0	0	36	106	74.13	121	0	0
1	107723760	107723760	A	T	SNP	Tnfrsf11a	NM_009399.3	mouse	genbank	58_37k	1	validated	missense	c.901	p.S301C	0	NULL	HMMPfam_TNFR_c6,HMMSmart_SM00208,PatternScan_TNFR_NGFR_1,PatternScan_EGF_2,superfamily_TNF receptor-like	0	no_errors	MOC22	124	0	0	33	69	67.65	165	1	0.6	158	0	0
1	108895555	108895555	C	A	SNP	Serpinb13	NM_172852.3	mouse	genbank	58_37k	1	validated	missense	c.703	p.P235T	0	HMMPfam_Serpin,HMMSmart_SERPIN,superfamily_Prot_inh_serpin	HMMPfam_Serpin,HMMSmart_SERPIN,PatternScan_SERPIN,superfamily_Prot_inh_serpin	0	no_errors	MOC22	91	0	0	57	34	37.36	135	0	0	99	0	0
1	109052056	109052056	A	T	SNP	Serpinb3b	NM_198680.2	mouse	genbank	58_37k	-1	provisional	missense	c.692	p.I231K	0	HMMPfam_Serpin,HMMSmart_SERPIN,superfamily_Prot_inh_serpin	HMMPfam_Serpin,HMMSmart_SERPIN,PatternScan_SERPIN,superfamily_Prot_inh_serpin	0	no_errors	MOC1	104	28	21.21	125	0	0	208	0	0	163	0	0
1	109494069	109494069	A	T	SNP	Serpinb8	NM_011459.4	mouse	genbank	58_37k	1	validated	missense	c.23	p.N8I	0	HMMPfam_Serpin,superfamily_Prot_inh_serpin	HMMPfam_Serpin,HMMSmart_SERPIN,PatternScan_SERPIN,superfamily_Prot_inh_serpin	0	no_errors	MOC1	10	61	85.92	75	0	0	105	0	0	89	0	0
1	112789846	112789846	A	T	SNP	Cdh19	NM_001081386.1	mouse	genbank	58_37k	-1	provisional	missense	c.1738	p.C580S	0	NULL	HMMPfam_Cadherin_C,HMMPfam_Cadherin,HMMSmart_SM00112,PatternScan_CADHERIN_1,superfamily_Cadherin-like	0	no_errors	MOC23	24	0	0	17	0	0	6	28	82.35	30	0	0
1	117956707	117956707	A	T	SNP	Cntnap5a	NM_001077425.1	mouse	genbank	58_37k	1	provisional	silent	c.390	p.V130	0	HMMPfam_F5_F8_type_C,HMMSmart_FA58C,superfamily_Gal_bind_like	HMMPfam_F5_F8_type_C,HMMSmart_FA58C,PatternScan_FA58C_1,PatternScan_FA58C_2,HMMSmart_LamG,PatternScan_FIBRIN_AG_C_DOMAIN,superfamily_Fibrinogen_a/b/g_C,HMMPfam_EGF,HMMSmart_EGF,superfamily_Gal_bind_like,superfamily_ConA_like_lec_gl,HMMPfam_Laminin_G_2,PatternScan_EGF_1,PatternScan_EGF_2	0	no_errors	MOC23	80	0	0	101	1	0.98	36	89	71.2	144	0	0
1	118351596	118351596	A	C	SNP	Cntnap5a	NM_001077425.1	mouse	genbank	58_37k	1	provisional	missense	c.3016	p.T1006P	0	superfamily_ConA_like_lec_gl	HMMPfam_F5_F8_type_C,HMMSmart_FA58C,PatternScan_FA58C_1,PatternScan_FA58C_2,HMMSmart_LamG,PatternScan_FIBRIN_AG_C_DOMAIN,superfamily_Fibrinogen_a/b/g_C,HMMPfam_EGF,HMMSmart_EGF,superfamily_Gal_bind_like,superfamily_ConA_like_lec_gl,HMMPfam_Laminin_G_2,PatternScan_EGF_1,PatternScan_EGF_2	0	no_errors	MOC23	184	0	0	177	0	0	197	74	27.31	302	0	0
1	120444539	120444539	A	T	SNP	Clasp1	NM_001081276.1	mouse	genbank	58_37k	1	validated	missense	c.2828	p.K943M	0	superfamily_ARM repeat	HMMPfam_HEAT,superfamily_ARM repeat	0	no_errors	MOC22	128	0	0	64	52	44.83	195	0	0	135	0	0
1	120565307	120565307	G	T	SNP	Tcfcp2l1	NM_023755.2	mouse	genbank	58_37k	1	validated	silent	c.1194	p.L398	0	NULL	HMMPfam_CP2,superfamily_SAM_homology	0	no_errors	MOC22	107	0	0	58	34	36.96	115	0	0	133	1	0.75
1	121831096	121831096	A	C	SNP	Gm101	ENSMUST00000037840	mouse	ensembl	58_37k	-1	known	splice_site	c.975+2	e10+2	0	0	0	0	no_errors	MOC23	118	0	0	97	0	0	34	70	67.31	113	0	0
1	122062739	122062739	A	T	SNP	3110009E18Rik	NM_028439.2	mouse	genbank	58_37k	1	validated	missense	c.212	p.H71L	0	HMMPfam_DUF2340	HMMPfam_DUF2340	0	no_errors	MOC1	32	6	15.79	39	0	0	55	0	0	58	0	0
1	122140585	122140585	T	A	SNP	Steap3	ENSMUST00000051660	mouse	ensembl	58_37k	-1	known	silent	c.366	p.P122	0	HMMPfam_F420_oxidored,superfamily_NAD(P)-binding Rossmann-fold domains	HMMPfam_F420_oxidored,HMMPfam_Ferric_reduct,superfamily_NAD(P)-binding Rossmann-fold domains	0	no_errors	MOC22	87	0	0	37	18	32.73	126	0	0	113	0	0
1	122166769	122166769	G	A	SNP	Steap3	ENSMUST00000051660	mouse	ensembl	58_37k	-1	known	silent	c.39	p.P13	0	NULL	HMMPfam_F420_oxidored,HMMPfam_Ferric_reduct,superfamily_NAD(P)-binding Rossmann-fold domains	0	no_errors	MOC23	154	0	0	168	2	1.18	60	176	74.58	234	1	0.43
1	123216181	123216181	T	G	SNP	Insig2	NM_133748.1	mouse	genbank	58_37k	-1	provisional	silent	c.237	p.T79	0	HMMPfam_INSIG	HMMPfam_INSIG	0	no_errors	MOC22	26	0	0	10	10	50	32	0	0	26	0	0
1	123372703	123372703	A	C	SNP	Ccdc93	NM_001025156.2	mouse	genbank	58_37k	1	validated	missense	c.983	p.Q328P	0	NULL	HMMPfam_KOG2701	0	no_errors	MOC1	49	11	18.33	42	0	0	66	0	0	56	0	0
1	123404181	123404181	A	T	SNP	LOC100041926	XM_001477223.1	mouse	genbank	58_37k	-1	model	missense	c.245	p.M82K	0	HMMPfam_UcrQ,superfamily_Ubiquinone-binding protein QP-C of cytochrome bc1 complex (Ubiquinol-cytochrome c reductase)	HMMPfam_UcrQ,superfamily_Ubiquinone-binding protein QP-C of cytochrome bc1 complex (Ubiquinol-cytochrome c reductase)	0	no_errors	MOC22	38	0	0	15	23	60.53	61	0	0	58	0	0
1	123451885	123451885	T	G	SNP	Ddx18	NM_025860.3	mouse	genbank	58_37k	-1	validated	missense	c.1748	p.H583P	0	NULL	PatternScan_DEAD_ATP_HELICASE,HMMPfam_Helicase_C,HMMSmart_SM00490,HMMPfam_DEAD,HMMSmart_SM00487,superfamily_P-loop containing nucleoside triphosphate hydrolases	0	no_errors	MOC22	206	0	0	53	130	71.04	245	2	0.81	233	2	0.84
1	123458290	123458290	T	A	SNP	Ddx18	NM_025860.3	mouse	genbank	58_37k	-1	validated	missense	c.698	p.K233M	0	HMMPfam_DEAD,HMMSmart_SM00487,superfamily_P-loop containing nucleoside triphosphate hydrolases	PatternScan_DEAD_ATP_HELICASE,HMMPfam_Helicase_C,HMMSmart_SM00490,HMMPfam_DEAD,HMMSmart_SM00487,superfamily_P-loop containing nucleoside triphosphate hydrolases	0	no_errors	MOC23	110	0	0	103	1	0.96	52	123	70.29	138	1	0.72
1	125250019	125250019	A	T	SNP	Dpp10	NM_199021.3	mouse	genbank	58_37k	-1	validated	missense	c.1868	p.V623E	0	HMMPfam_Peptidase_S9,superfamily_SSF53474	HMMPfam_Peptidase_S9,HMMPfam_DPPIV_N,superfamily_SSF53474,superfamily_SSF82171	0	no_errors	MOC1	38	142	78.89	207	0	0	240	0	0	303	0	0
1	127290600	127290600	T	A	SNP	Actr3	NM_023735.1	mouse	genbank	58_37k	-1	provisional	missense	c.1229	p.H410L	0	HMMPfam_Actin,HMMSmart_SM00268,superfamily_Actin-like ATPase domain	HMMPfam_Actin,HMMSmart_SM00268,PatternScan_ACTINS_ACT_LIKE,superfamily_Actin-like ATPase domain	0	no_errors	MOC1	38	178	82.03	195	0	0	314	1	0.32	293	0	0
1	127291697	127291697	T	A	SNP	Actr3	NM_023735.1	mouse	genbank	58_37k	-1	provisional	missense	c.1109	p.H370L	0	HMMPfam_Actin,HMMSmart_SM00268,superfamily_Actin-like ATPase domain	HMMPfam_Actin,HMMSmart_SM00268,PatternScan_ACTINS_ACT_LIKE,superfamily_Actin-like ATPase domain	0	no_errors	MOC22	116	0	0	69	37	34.91	133	0	0	125	1	0.79
1	127472799	127472799	A	C	SNP	Slc35f5	NM_028787.4	mouse	genbank	58_37k	1	provisional	silent	c.886	p.R296	0	HMMPfam_DUF6,superfamily_SSF103481	HMMPfam_DUF6,superfamily_SSF103481	0	no_errors	MOC22	114	0	0	53	22	29.33	144	0	0	93	0	0
1	127481028	127481028	A	T	SNP	Slc35f5	NM_028787.4	mouse	genbank	58_37k	1	provisional	splice_site	c.989-2	e11-2	0	0	0	0	no_errors	MOC22	162	0	0	50	79	61.24	185	0	0	176	0	0
1	127483985	127483985	A	T	SNP	Slc35f5	NM_028787.4	mouse	genbank	58_37k	1	provisional	missense	c.1297	p.S433C	0	NULL	HMMPfam_DUF6,superfamily_SSF103481	0	no_errors	MOC1	26	145	84.8	155	0	0	221	0	0	222	0	0
1	128119214	128119214	A	T	SNP	Nckap5	NM_001081756.1	mouse	genbank	58_37k	-1	validated	missense	c.554	p.L185Q	0	NULL	NULL	0	no_errors	MOC22	106	0	0	91	32	26.02	180	2	1.1	144	0	0
1	129574076	129574076	T	A	SNP	Tmem163	NM_028135.2	mouse	genbank	58_37k	-1	validated	missense	c.131	p.Q44L	0	NULL	NULL	0	no_errors	MOC22	88	0	0	18	36	66.67	129	0	0	119	1	0.83
1	129645684	129645684	A	T	SNP	Acmsd	NM_001033041.2	mouse	genbank	58_37k	1	provisional	missense	c.368	p.E123V	0	HMMPfam_Amidohydro_2,superfamily_Metallo-dependent hydrolases	HMMPfam_Amidohydro_2,superfamily_Metallo-dependent hydrolases	0	no_errors	MOC22	108	0	0	64	24	27.27	140	0	0	131	0	0
1	129835201	129835201	G	T	SNP	Rab3gap1	NM_178690.4	mouse	genbank	58_37k	1	validated	missense	c.2540	p.R847L	0	NULL	NULL	0	no_errors	MOC22	139	0	0	94	38	28.79	155	0	0	178	1	0.56
1	130171513	130171513	A	T	SNP	Ubxn4	NM_026390.2	mouse	genbank	58_37k	1	validated	silent	c.1314	p.A438	0	NULL	HMMPfam_UBX,HMMSmart_SM00166,superfamily_Thioredoxin-like,superfamily_Ubiquitin-like	0	no_errors	MOC23	160	0	0	115	0	0	173	44	20.28	197	0	0
1	130181846	130181846	T	A	SNP	Lct	NM_001081078.1	mouse	genbank	58_37k	-1	provisional	silent	c.5646	p.A1882	0	NULL	HMMPfam_Glyco_hydro_1,superfamily_(Trans)glycosidases,PatternScan_GLYCOSYL_HYDROL_F1_1,PatternScan_GLYCOSYL_HYDROL_F1_2	0	no_errors	MOC1	18	5	21.74	22	0	0	43	0	0	33	0	0
1	130196787	130196787	T	A	SNP	Lct	NM_001081078.1	mouse	genbank	58_37k	-1	provisional	missense	c.3545	p.Q1182L	0	HMMPfam_Glyco_hydro_1,superfamily_(Trans)glycosidases	HMMPfam_Glyco_hydro_1,superfamily_(Trans)glycosidases,PatternScan_GLYCOSYL_HYDROL_F1_1,PatternScan_GLYCOSYL_HYDROL_F1_2	0	no_errors	MOC22	148	0	0	40	110	73.33	167	0	0	169	1	0.59
1	130197717	130197717	G	A	SNP	Lct	NM_001081078.1	mouse	genbank	58_37k	-1	provisional	missense	c.2615	p.A872V	0	NULL	HMMPfam_Glyco_hydro_1,superfamily_(Trans)glycosidases,PatternScan_GLYCOSYL_HYDROL_F1_1,PatternScan_GLYCOSYL_HYDROL_F1_2	0	no_errors	MOC23	142	0	0	117	0	0	130	48	26.97	165	0	0
1	130486070	130486070	T	A	SNP	Cxcr4	NM_009911.3	mouse	genbank	58_37k	-1	validated	missense	c.430	p.T144S	0	HMMPfam_7tm_1,superfamily_Family A G protein-coupled receptor-like	HMMPfam_7tm_1,PatternScan_G_PROTEIN_RECEP_F1_1,superfamily_Family A G protein-coupled receptor-like	0	no_errors	MOC22	105	0	0	58	36	38.3	132	0	0	124	0	0
1	131698159	131698159	A	T	SNP	LOC100042740	XM_001479168.1	mouse	genbank	58_37k	-1	model	missense	c.183	p.D61E	0	HMMPfam_Ribosomal_L31e,superfamily_Ribosomal protein L31e	HMMPfam_Ribosomal_L31e,superfamily_Ribosomal protein L31e,PatternScan_RIBOSOMAL_L31E	0	no_errors	MOC22	143	0	0	111	41	26.97	242	1	0.41	237	0	0
1	132479495	132479495	G	A	SNP	Zp3r	NM_009581.2	mouse	genbank	58_37k	-1	validated	missense	c.1261	p.L421F	0	NULL	HMMPfam_Sushi,HMMSmart_SM00032,superfamily_Complement control module/SCR domain	0	no_errors	MOC22	108	0	0	68	24	26.09	118	0	0	116	0	0
1	132639364	132639364	G	T	SNP	AA986860	NM_177604.3	mouse	genbank	58_37k	1	validated	nonsense	c.10	p.E4*	0	NULL	NULL	0	no_errors	MOC23	84	0	0	64	0	0	77	29	27.36	110	0	0
1	132640394	132640394	G	A	SNP	AA986860	NM_177604.3	mouse	genbank	58_37k	1	validated	missense	c.1040	p.G347E	0	NULL	NULL	0	no_errors	MOC22	74	0	0	20	45	69.23	92	0	0	82	0	0
1	132708113	132708113	A	T	SNP	Fcamr	NM_144960.2	mouse	genbank	58_37k	1	validated	missense	c.404	p.Q135L	0	HMMSmart_SM00409,HMMPfam_V-set,superfamily_Immunoglobulin	HMMSmart_SM00409,HMMPfam_V-set,superfamily_Immunoglobulin	0	no_errors	MOC1	16	63	79.75	83	0	0	133	0	0	111	0	0
1	132741217	132741217	C	A	SNP	Pigr	NM_011082.3	mouse	genbank	58_37k	1	validated	silent	c.594	p.T198	0	HMMSmart_IG,HMMPfam_V-set,superfamily_SSF48726	HMMSmart_IG,HMMPfam_V-set,superfamily_SSF48726	0	no_errors	MOC23	101	0	0	88	0	0	83	36	30.25	110	0	0
1	132746313	132746313	G	A	SNP	Pigr	NM_011082.3	mouse	genbank	58_37k	1	validated	missense	c.2167	p.V723M	0	NULL	HMMSmart_IG,HMMPfam_V-set,superfamily_SSF48726	0	no_errors	MOC23	175	0	0	127	0	0	45	158	77.83	186	1	0.53
1	133528968	133528968	C	A	SNP	LOC667238	XR_034191.1	mouse	genbank	58_37k	-1	model	rna	NULL	NULL	0	0	0	0	pseudogene	MOC23	40	0	0	40	0	0	15	45	75	53	0	0
1	133558608	133558608	C	A	SNP	Ctse	NM_007799.3	mouse	genbank	58_37k	1	validated	silent	c.36	p.L12	0	superfamily_Pept_Aspartic	HMMPfam_Asp,PatternScan_ASP_PROTEASE,superfamily_Pept_Aspartic,HMMPfam_A1_Propeptide	0	no_errors	MOC22	130	0	0	49	66	57.39	165	0	0	168	1	0.59
1	133647186	133647186	C	T	SNP	Slc26a9	NM_177243.4	mouse	genbank	58_37k	1	validated	silent	c.12	p.P4	0	NULL	HMMPfam_STAS,superfamily_Anti-sigma factor antagonist SpoIIaa,HMMPfam_Sulfate_transp	0	no_errors	MOC22	187	0	0	54	88	61.97	273	2	0.73	250	0	0
1	133767349	133767349	A	T	SNP	Rab7l1	NM_144875.2	mouse	genbank	58_37k	1	validated	missense	c.289	p.S97C	0	HMMSmart_SM00176,HMMSmart_SM00173,HMMSmart_SM00174,HMMSmart_SM00175,HMMPfam_Ras,superfamily_P-loop containing nucleoside triphosphate hydrolases	HMMSmart_SM00176,HMMSmart_SM00173,HMMSmart_SM00174,HMMSmart_SM00175,HMMPfam_Ras,superfamily_P-loop containing nucleoside triphosphate hydrolases	0	no_errors	MOC22	250	0	0	124	74	37.37	283	0	0	242	0	0
1	133874040	133874040	A	C	SNP	Slc45a3	NM_145977.1	mouse	genbank	58_37k	1	provisional	missense	c.223	p.S75R	0	HMMPfam_MFS_1,superfamily_MFS_gen_substrate_transporter	HMMPfam_MFS_1,superfamily_MFS_gen_substrate_transporter	0	no_errors	MOC22	130	0	0	108	30	21.74	215	0	0	171	0	0
1	133964413	133964413	G	T	SNP	Mfsd4	NM_172510.4	mouse	genbank	58_37k	-1	validated	silent	c.57	p.L19	0	superfamily_MFS_gen_substrate_transporter	superfamily_MFS_gen_substrate_transporter	0	no_errors	MOC23	38	0	0	36	0	0	39	14	26.42	64	0	0
1	134254345	134254345	T	A	SNP	Tmcc2	NM_178874.2	mouse	genbank	58_37k	-1	provisional	missense	c.1859	p.Q620L	0	HMMPfam_Tmemb_cc2	HMMPfam_Tmemb_cc2	0	no_errors	MOC23	115	0	0	87	0	0	103	39	27.46	147	0	0
1	134346366	134346366	A	T	SNP	Dstyk	NM_172516.4	mouse	genbank	58_37k	1	validated	missense	c.1132	p.M378L	0	NULL	HMMSmart_SM00219,HMMSmart_SM00220,PatternScan_PROTEIN_KINASE_ST,superfamily_Protein kinase-like (PK-like),PatternScan_PROTEIN_KINASE_ATP,HMMPfam_Pkinase	0	no_errors	MOC1	113	23	16.91	122	0	0	172	0	0	138	0	0
1	134349775	134349775	A	C	SNP	Dstyk	NM_172516.4	mouse	genbank	58_37k	1	validated	missense	c.1430	p.K477T	0	NULL	HMMSmart_SM00219,HMMSmart_SM00220,PatternScan_PROTEIN_KINASE_ST,superfamily_Protein kinase-like (PK-like),PatternScan_PROTEIN_KINASE_ATP,HMMPfam_Pkinase	0	no_errors	MOC1	74	8	9.76	65	0	0	89	0	0	90	0	0
1	134413193	134413193	T	A	SNP	Cntn2	NM_177129.5	mouse	genbank	58_37k	-1	validated	missense	c.2758	p.N920Y	0	HMMSmart_FN3,superfamily_FN_III-like	HMMSmart_IGc2,HMMSmart_IG,HMMPfam_fn3,HMMSmart_FN3,superfamily_FN_III-like,HMMPfam_I-set,HMMPfam_ig,superfamily_SSF48726	0	no_errors	MOC22	51	0	0	17	22	56.41	75	1	1.32	60	0	0
1	134425795	134425795	G	T	SNP	Cntn2	NM_177129.5	mouse	genbank	58_37k	-1	validated	missense	c.190	p.R64S	0	HMMSmart_IGc2,HMMPfam_ig,superfamily_SSF48726	HMMSmart_IGc2,HMMSmart_IG,HMMPfam_fn3,HMMSmart_FN3,superfamily_FN_III-like,HMMPfam_I-set,HMMPfam_ig,superfamily_SSF48726	0	no_errors	MOC1	33	174	84.06	166	0	0	214	0	0	246	0	0
1	134498749	134498749	A	T	SNP	Nfasc	NM_182716.4	mouse	genbank	58_37k	-1	reviewed	missense	c.2269	p.F757I	0	HMMPfam_fn3,HMMSmart_FN3,superfamily_FN_III-like	HMMSmart_IGc2,HMMSmart_IG,HMMPfam_fn3,HMMSmart_FN3,superfamily_FN_III-like,HMMPfam_I-set,HMMPfam_ig,superfamily_SSF48726	0	no_errors	MOC23	66	0	0	51	0	0	21	59	73.75	62	0	0
1	134500424	134500424	T	A	SNP	Nfasc	NM_182716.4	mouse	genbank	58_37k	-1	reviewed	missense	c.2198	p.D733V	0	HMMPfam_fn3,HMMSmart_FN3,superfamily_FN_III-like	HMMSmart_IGc2,HMMSmart_IG,HMMPfam_fn3,HMMSmart_FN3,superfamily_FN_III-like,HMMPfam_I-set,HMMPfam_ig,superfamily_SSF48726	0	no_errors	MOC23	59	0	0	72	0	0	77	13	14.44	93	0	0
1	134533670	134533670	T	A	SNP	Nfasc	NM_182716.4	mouse	genbank	58_37k	-1	reviewed	splice_site	c.110-2	e3-2	0	0	0	0	no_errors	MOC23	148	0	0	182	1	0.55	63	168	72.73	241	2	0.82
1	134629068	134629068	A	T	SNP	ENSMUSG00000073566	ENSMUST00000097577	mouse	ensembl	58_37k	1	known	missense	c.47	p.H16L	0	NULL	NULL	0	no_errors	MOC1	139	24	14.72	135	1	0.73	204	0	0	212	1	0.47
1	134897973	134897973	C	A	SNP	Mdm4	NM_008575.3	mouse	genbank	58_37k	-1	provisional	missense	c.559	p.D187Y	0	NULL	HMMSmart_RING,HMMSmart_ZnF_RBZ,PatternScan_ZF_RANBP2_1,HMMPfam_SWIB,superfamily_MDM2,superfamily_SSF57850	0	no_errors	MOC23	66	0	0	39	0	0	49	19	27.94	59	0	0
1	134966911	134966911	A	T	SNP	Pik3c2b	ENSMUST00000077730	mouse	ensembl	58_37k	1	known	missense	c.947	p.H316L	0	superfamily_Ubiquitin-like	HMMPfam_C2,HMMSmart_SM00239,HMMPfam_PI3K_rbd,HMMSmart_SM00144,HMMPfam_PI3_PI4_kinase,HMMSmart_SM00146,HMMPfam_PI3Ka,HMMSmart_SM00145,HMMPfam_PX,HMMSmart_SM00312,superfamily_PX domain,HMMPfam_PI3K_C2,HMMSmart_SM00142,superfamily_C2 domain (Calcium/lipid-binding domain CaLB),superfamily_Protein kinase-like (PK-like),superfamily_ARM repeat,PatternScan_PI3_4_KINASE_1,PatternScan_PI3_4_KINASE_2,superf…	0	no_errors	MOC23	112	0	0	77	0	0	34	60	63.83	143	0	0
1	134974006	134974006	A	T	SNP	Pik3c2b	ENSMUST00000077730	mouse	ensembl	58_37k	1	known	missense	c.1667	p.Q556L	0	NULL	HMMPfam_C2,HMMSmart_SM00239,HMMPfam_PI3K_rbd,HMMSmart_SM00144,HMMPfam_PI3_PI4_kinase,HMMSmart_SM00146,HMMPfam_PI3Ka,HMMSmart_SM00145,HMMPfam_PX,HMMSmart_SM00312,superfamily_PX domain,HMMPfam_PI3K_C2,HMMSmart_SM00142,superfamily_C2 domain (Calcium/lipid-binding domain CaLB),superfamily_Protein kinase-like (PK-like),superfamily_ARM repeat,PatternScan_PI3_4_KINASE_1,PatternScan_PI3_4_KINASE_2,superf…	0	no_errors	MOC23	134	0	0	111	0	0	51	116	69.46	168	1	0.59
1	134981553	134981553	A	T	SNP	Pik3c2b	ENSMUST00000077730	mouse	ensembl	58_37k	1	known	missense	c.2222	p.N741I	0	HMMPfam_PI3K_C2,superfamily_C2 domain (Calcium/lipid-binding domain CaLB)	HMMPfam_C2,HMMSmart_SM00239,HMMPfam_PI3K_rbd,HMMSmart_SM00144,HMMPfam_PI3_PI4_kinase,HMMSmart_SM00146,HMMPfam_PI3Ka,HMMSmart_SM00145,HMMPfam_PX,HMMSmart_SM00312,superfamily_PX domain,HMMPfam_PI3K_C2,HMMSmart_SM00142,superfamily_C2 domain (Calcium/lipid-binding domain CaLB),superfamily_Protein kinase-like (PK-like),superfamily_ARM repeat,PatternScan_PI3_4_KINASE_1,PatternScan_PI3_4_KINASE_2,superf…	0	no_errors	MOC23	58	0	0	42	1	2.33	12	42	77.78	59	0	0
1	134999957	134999957	C	T	SNP	Pik3c2b	ENSMUST00000077730	mouse	ensembl	58_37k	1	known	missense	c.4423	p.P1475S	0	HMMPfam_PX,HMMSmart_SM00312,superfamily_PX domain	HMMPfam_C2,HMMSmart_SM00239,HMMPfam_PI3K_rbd,HMMSmart_SM00144,HMMPfam_PI3_PI4_kinase,HMMSmart_SM00146,HMMPfam_PI3Ka,HMMSmart_SM00145,HMMPfam_PX,HMMSmart_SM00312,superfamily_PX domain,HMMPfam_PI3K_C2,HMMSmart_SM00142,superfamily_C2 domain (Calcium/lipid-binding domain CaLB),superfamily_Protein kinase-like (PK-like),superfamily_ARM repeat,PatternScan_PI3_4_KINASE_1,PatternScan_PI3_4_KINASE_2,superf…	0	no_errors	MOC23	93	0	0	65	0	0	33	73	68.87	76	0	0
1	135028562	135028562	A	T	SNP	Ppp1r15b	NM_133819.3	mouse	genbank	58_37k	1	validated	missense	c.239	p.Q80L	0	HMMPfam_CReP_N	HMMPfam_CReP_N,HMMPfam_PP1c_bdg	0	no_errors	MOC22	131	0	0	39	79	66.95	195	1	0.51	177	0	0
1	135033294	135033294	A	C	SNP	Ppp1r15b	NM_133819.3	mouse	genbank	58_37k	1	validated	missense	c.1924	p.K642Q	0	HMMPfam_PP1c_bdg	HMMPfam_CReP_N,HMMPfam_PP1c_bdg	0	no_errors	MOC23	62	0	0	54	1	1.82	39	14	26.42	57	0	0
1	135176955	135176955	A	T	SNP	Plekha6	NM_182930.2	mouse	genbank	58_37k	1	validated	missense	c.1786	p.T596S	0	NULL	HMMPfam_PH,HMMSmart_PH,superfamily_SSF50729	0	no_errors	MOC22	192	0	0	46	90	66.18	244	1	0.41	280	0	0
1	135275071	135275071	T	A	SNP	Etnk2	ENSMUST00000135222	mouse	ensembl	58_37k	1	known	missense	c.1057	p.Y353N	0	superfamily_Kinase_like	PatternScan_ATPASE_GAMMA,HMMPfam_Choline_kinase,superfamily_Kinase_like	0	no_errors	MOC22	239	0	0	63	121	65.76	315	0	0	306	0	0
1	135280413	135280413	A	T	SNP	Sox13	NM_011439.2	mouse	genbank	58_37k	-1	validated	missense	c.1657	p.Y553N	0	NULL	HMMPfam_HMG_box,HMMSmart_SM00398,superfamily_HMG-box	0	no_errors	MOC22	125	0	0	39	67	63.21	178	0	0	155	0	0
1	135521315	135521315	T	A	SNP	Zc3h11a	NM_144530.5	mouse	genbank	58_37k	-1	validated	missense	c.1630	p.T544S	0	NULL	HMMSmart_SM00356	0	no_errors	MOC22	108	0	0	16	53	76.81	82	1	1.2	100	5	4.76
1	135576735	135576735	A	T	SNP	Lax1	NM_172842.3	mouse	genbank	58_37k	-1	validated	missense	c.844	p.C282S	0	NULL	NULL	0	no_errors	MOC22	74	0	0	53	23	30.26	90	0	0	105	0	0
1	135628843	135628843	A	T	SNP	Atp2b4	NM_213616.3	mouse	genbank	58_37k	-1	validated	missense	c.1277	p.L426Q	0	HMMPfam_E1-E2_ATPase,superfamily_SSF81665	HMMPfam_Cation_ATPase_N,HMMPfam_Hydrolase,HMMPfam_Cation_ATPase_C,HMMPfam_E1-E2_ATPase,PatternScan_ATPASE_E1_E2,superfamily_SSF56784,superfamily_SSF81653,superfamily_SSF81660,superfamily_SSF81665	0	no_errors	MOC22	42	0	0	10	22	68.75	35	0	0	32	0	0
1	135801616	135801616	T	A	SNP	Optc	NM_054076.2	mouse	genbank	58_37k	-1	validated	missense	c.163	p.N55Y	0	NULL	HMMSmart_LRRNT,HMMPfam_LRR_1,HMMSmart_LRR_TYP,superfamily_SSF52058	0	no_errors	MOC1	90	19	17.43	73	0	0	89	0	0	110	0	0
1	136042183	136042183	T	A	SNP	Chit1	NM_027979.1	mouse	genbank	58_37k	1	provisional	missense	c.496	p.F166I	0	HMMPfam_Glyco_hydro_18,HMMSmart_SM00636,superfamily_(Trans)glycosidases	HMMPfam_Glyco_hydro_18,PatternScan_CHITINASE_18,HMMPfam_CBM_14,HMMSmart_SM00494,superfamily_Invertebrate chitin-binding proteins,HMMSmart_SM00636,superfamily_(Trans)glycosidases,superfamily_Chitinase insertion domain	0	no_errors	MOC1	13	72	84.71	100	0	0	94	0	0	107	0	0
1	136042184	136042184	T	A	SNP	Chit1	NM_027979.1	mouse	genbank	58_37k	1	provisional	missense	c.497	p.F166Y	0	HMMPfam_Glyco_hydro_18,HMMSmart_SM00636,superfamily_(Trans)glycosidases	HMMPfam_Glyco_hydro_18,PatternScan_CHITINASE_18,HMMPfam_CBM_14,HMMSmart_SM00494,superfamily_Invertebrate chitin-binding proteins,HMMSmart_SM00636,superfamily_(Trans)glycosidases,superfamily_Chitinase insertion domain	0	no_errors	MOC1	13	70	84.34	102	0	0	94	0	0	106	0	0
1	136223391	136223391	A	T	SNP	Ppfia4	ENSMUST00000027729	mouse	ensembl	58_37k	-1	known	splice_site	c.900+2	e7+2	0	0	0	0	no_errors	MOC22	283	0	0	151	56	26.92	274	0	0	348	0	0
1	136287227	136287227	G	T	SNP	4933406M09Rik	NM_173771.4	mouse	genbank	58_37k	1	validated	nonsense	c.1003	p.E335*	0	NULL	HMMPfam_Glyco_transf_54,PatternScan_RBFA	0	no_errors	MOC1	7	26	78.79	45	0	0	55	0	0	62	0	0
1	136321466	136321466	A	T	SNP	Adipor1	NM_028320.3	mouse	genbank	58_37k	1	validated	missense	c.397	p.T133S	0	HMMPfam_HlyIII	HMMPfam_HlyIII	0	no_errors	MOC22	48	0	0	14	22	61.11	65	0	0	71	0	0
1	136360519	136360519	A	T	SNP	Klhl12	NM_153128.2	mouse	genbank	58_37k	1	provisional	missense	c.311	p.Q104L	0	HMMSmart_BTB,superfamily_BTB/POZ_fold,HMMPfam_BTB	HMMSmart_BTB,HMMPfam_Kelch_1,HMMSmart_Kelch,superfamily_Gal_oxid_central,superfamily_BTB/POZ_fold,HMMPfam_BACK,HMMPfam_BTB	0	no_errors	MOC1	31	111	78.17	110	0	0	120	0	0	161	0	0
1	136494195	136494195	A	T	SNP	Kdm5b	NM_152895.2	mouse	genbank	58_37k	1	validated	missense	c.844	p.T282S	0	NULL	HMMPfam_ARID,HMMSmart_SM00501,superfamily_ARID-like,HMMSmart_SM00249,HMMSmart_SM00558,HMMPfam_JmjN,HMMSmart_SM00545,HMMPfam_zf-C5HC2,superfamily_FYVE/PHD zinc finger,HMMPfam_JmjC,HMMPfam_PLU-1,PatternScan_ZF_PHD_1,HMMPfam_PHD	0	no_errors	MOC1	16	78	82.98	91	0	0	86	0	0	107	0	0
1	136521754	136521754	A	T	SNP	Kdm5b	NM_152895.2	mouse	genbank	58_37k	1	validated	missense	c.3890	p.Q1297L	0	NULL	HMMPfam_ARID,HMMSmart_SM00501,superfamily_ARID-like,HMMSmart_SM00249,HMMSmart_SM00558,HMMPfam_JmjN,HMMSmart_SM00545,HMMPfam_zf-C5HC2,superfamily_FYVE/PHD zinc finger,HMMPfam_JmjC,HMMPfam_PLU-1,PatternScan_ZF_PHD_1,HMMPfam_PHD	0	no_errors	MOC22	128	0	0	72	26	26.26	107	0	0	140	0	0
1	136770547	136770547	T	C	SNP	Ppp1r12b	NM_001081307.1	mouse	genbank	58_37k	-1	provisional	missense	c.1507	p.S503G	0	NULL	HMMPfam_Ank,HMMSmart_ANK,superfamily_ANK	0	no_errors	MOC23	191	0	0	144	0	0	3	132	97.78	176	1	0.56
1	136776324	136776324	T	A	SNP	Ppp1r12b	NM_001081307.1	mouse	genbank	58_37k	-1	provisional	splice_site	c.1142-2	e9-2	0	0	0	0	no_errors	MOC22	45	0	0	15	24	61.54	33	0	0	42	0	0
1	137050809	137050809	A	T	SNP	Arl8a	NM_026823.2	mouse	genbank	58_37k	1	provisional	missense	c.335	p.H112L	0	HMMSmart_ARF,HMMPfam_Arf,superfamily_SSF52540	HMMSmart_ARF,HMMPfam_Arf,superfamily_SSF52540	0	no_errors	MOC22	66	0	0	29	14	32.56	52	1	1.85	80	0	0
1	137058203	137058203	T	A	SNP	Gpr37l1	NM_134438.3	mouse	genbank	58_37k	-1	validated	missense	c.301	p.S101C	0	HMMPfam_7tm_1,superfamily_SSF81321	HMMPfam_7tm_1,superfamily_SSF81321	0	no_errors	MOC23	85	0	0	75	0	0	1	76	98.7	105	0	0
1	137129665	137129665	C	A	SNP	LOC100043064	XR_034434.1	mouse	genbank	58_37k	1	model	rna	NULL	NULL	0	0	0	0	pseudogene	MOC23	113	0	0	115	1	0.86	2	120	98.36	131	1	0.76
1	137153727	137153727	C	T	SNP	Elf3	NM_007921.3	mouse	genbank	58_37k	-1	validated	silent	c.237	p.V79	0	HMMPfam_SAM_PNT,HMMSmart_SM00251,superfamily_SAM/Pointed domain	HMMPfam_Ets,HMMSmart_SM00413,HMMPfam_SAM_PNT,HMMSmart_SM00251,superfamily_SAM/Pointed domain,superfamily_Winged helix DNA-binding domain	0	no_errors	MOC22	53	0	0	17	27	61.36	57	0	0	66	0	0
1	137351105	137351105	T	A	SNP	Nav1	NM_173437.2	mouse	genbank	58_37k	-1	validated	silent	c.4107	p.P1369	0	NULL	HMMSmart_SM00382,PatternScan_PPASE,superfamily_P-loop containing nucleoside triphosphate hydrolases	0	no_errors	MOC1	49	7	12.5	37	0	0	41	0	0	63	0	0
1	137967355	137967355	T	A	SNP	Cacna1s	NM_001081023.1	mouse	genbank	58_37k	1	provisional	splice_site	c.541+2	e4+2	0	0	0	0	no_errors	MOC23	293	0	0	259	1	0.38	3	296	99	399	3	0.74
1	137989235	137989235	T	A	SNP	Cacna1s	NM_001081023.1	mouse	genbank	58_37k	1	provisional	missense	c.2432	p.L811H	0	superfamily_Voltage-gated potassium channels	HMMPfam_Ion_trans,HMMPfam_Ca_chan_IQ,superfamily_Voltage-gated potassium channels	0	no_errors	MOC22	329	0	0	100	169	62.59	298	1	0.33	495	1	0.2
1	137994069	137994069	A	G	SNP	Cacna1s	NM_001081023.1	mouse	genbank	58_37k	1	provisional	missense	c.3034	p.T1012A	0	HMMPfam_Ion_trans,superfamily_Voltage-gated potassium channels	HMMPfam_Ion_trans,HMMPfam_Ca_chan_IQ,superfamily_Voltage-gated potassium channels	0	no_errors	MOC1	26	108	80.6	101	0	0	127	0	0	167	0	0
1	138004768	138004768	T	A	SNP	Cacna1s	NM_001081023.1	mouse	genbank	58_37k	1	provisional	missense	c.4225	p.Y1409N	0	NULL	HMMPfam_Ion_trans,HMMPfam_Ca_chan_IQ,superfamily_Voltage-gated potassium channels	0	no_errors	MOC1	41	127	75.6	147	0	0	155	0	0	199	0	0
1	138041764	138041764	G	T	SNP	Kif21b	NM_001039472.1	mouse	genbank	58_37k	1	provisional	nonsense	c.322	p.E108*	0	HMMPfam_Kinesin,HMMSmart_SM00129,superfamily_P-loop containing nucleoside triphosphate hydrolases	HMMSmart_SM00320,HMMPfam_Kinesin,HMMSmart_SM00129,superfamily_Prefoldin,superfamily_WD40 repeat-like,PatternScan_WD_REPEATS_1,HMMPfam_WD40,PatternScan_KINESIN_MOTOR_DOMAIN1,superfamily_P-loop containing nucleoside triphosphate hydrolases	0	no_errors	MOC1	16	102	86.44	115	0	0	117	0	0	180	0	0
1	138177421	138177421	T	C	SNP	Camsap1l1	NM_001081360.1	mouse	genbank	58_37k	-1	provisional	missense	c.2927	p.Q976R	0	NULL	superfamily_PRC-barrel domain,HMMPfam_DUF1781,superfamily_Calponin-homology domain CH-domain	0	no_errors	MOC22	121	0	0	69	16	18.82	111	0	0	111	0	0
1	138313533	138313533	A	G	SNP	Ddx59	NM_026500.2	mouse	genbank	58_37k	1	provisional	missense	c.364	p.T122A	0	HMMPfam_zf-HIT	HMMPfam_Helicase_C,HMMSmart_SM00490,HMMPfam_zf-HIT,HMMPfam_DEAD,HMMSmart_SM00487,superfamily_P-loop containing nucleoside triphosphate hydrolases	0	no_errors	MOC22	88	0	0	35	52	59.77	92	0	0	96	1	1.03
1	138394032	138394032	T	A	SNP	Kif14	NM_001081258.1	mouse	genbank	58_37k	1	provisional	silent	c.3012	p.L1004	0	NULL	HMMPfam_FHA,HMMSmart_SM00240,HMMPfam_Kinesin,HMMSmart_SM00129,superfamily_SMAD/FHA domain,PatternScan_KINESIN_MOTOR_DOMAIN1,superfamily_P-loop containing nucleoside triphosphate hydrolases	0	no_errors	MOC22	28	0	0	8	15	65.22	28	0	0	30	0	0
1	138742135	138742135	T	G	SNP	Nr5a2	NM_030676.3	mouse	genbank	58_37k	-1	validated	missense	c.1588	p.K530Q	0	HMMPfam_Hormone_recep,superfamily_Nuclear receptor ligand-binding domain	HMMPfam_Hormone_recep,HMMSmart_SM00430,HMMPfam_zf-C4,HMMSmart_SM00399,PatternScan_NUCLEAR_REC_DBD_1,superfamily_Nuclear receptor ligand-binding domain,superfamily_Glucocorticoid receptor-like (DNA-binding domain)	0	no_errors	MOC1	27	124	82.12	180	0	0	180	0	0	279	0	0
1	138742209	138742209	A	C	SNP	Nr5a2	NM_030676.3	mouse	genbank	58_37k	-1	validated	missense	c.1514	p.V505G	0	HMMPfam_Hormone_recep,HMMSmart_SM00430,superfamily_Nuclear receptor ligand-binding domain	HMMPfam_Hormone_recep,HMMSmart_SM00430,HMMPfam_zf-C4,HMMSmart_SM00399,PatternScan_NUCLEAR_REC_DBD_1,superfamily_Nuclear receptor ligand-binding domain,superfamily_Glucocorticoid receptor-like (DNA-binding domain)	0	no_errors	MOC1	22	93	80.87	115	0	0	143	2	1.38	204	1	0.49
1	139968909	139968909	A	T	SNP	Ptprc	NM_011210.3	mouse	genbank	58_37k	-1	validated	silent	c.2541	p.P847	0	HMMPfam_Y_phosphatase,HMMSmart_SM00194,superfamily_(Phosphotyrosine protein) phosphatases II	HMMPfam_Y_phosphatase,HMMSmart_SM00194,HMMSmart_SM00404,HMMPfam_fn3,HMMSmart_SM00060,superfamily_Fibronectin type III,PatternScan_TYR_PHOSPHATASE_1,superfamily_(Phosphotyrosine protein) phosphatases II	0	no_errors	MOC1	75	19	20.21	105	0	0	89	0	0	124	0	0
1	140938586	140938586	A	T	SNP	Dennd1b	NM_181347.3	mouse	genbank	58_37k	1	validated	missense	c.37	p.T13S	0	NULL	HMMPfam_DENN,HMMSmart_SM00799,HMMPfam_dDENN,HMMSmart_SM00801	0	no_errors	MOC22	63	0	0	26	37	58.73	55	0	0	77	1	1.28
1	141139805	141139805	T	A	SNP	Crb1	NM_133239.2	mouse	genbank	58_37k	-1	validated	missense	c.2423	p.Q808L	0	HMMSmart_LamG,superfamily_ConA_like_lec_gl,HMMPfam_Laminin_G_2	PatternScan_ASX_HYDROXYL,HMMSmart_LamG,HMMSmart_EGF_CA,HMMPfam_EGF,HMMSmart_EGF,superfamily_ConA_like_lec_gl,HMMPfam_Laminin_G_2,PatternScan_EGF_1,PatternScan_EGF_2,PatternScan_EGF_CA,PatternScan_C_TYPE_LECTIN_1,superfamily_SSF57196	0	no_errors	MOC1	11	82	88.17	96	0	0	123	0	0	114	0	0
1	141145251	141145251	T	A	SNP	Crb1	NM_133239.2	mouse	genbank	58_37k	-1	validated	missense	c.1570	p.I524F	0	HMMSmart_LamG,superfamily_ConA_like_lec_gl,HMMPfam_Laminin_G_2	PatternScan_ASX_HYDROXYL,HMMSmart_LamG,HMMSmart_EGF_CA,HMMPfam_EGF,HMMSmart_EGF,superfamily_ConA_like_lec_gl,HMMPfam_Laminin_G_2,PatternScan_EGF_1,PatternScan_EGF_2,PatternScan_EGF_CA,PatternScan_C_TYPE_LECTIN_1,superfamily_SSF57196	0	no_errors	MOC22	136	0	0	59	90	60.4	151	0	0	211	0	0
1	141219845	141219845	C	A	SNP	Crb1	NM_133239.2	mouse	genbank	58_37k	-1	validated	missense	c.944	p.C315F	0	PatternScan_ASX_HYDROXYL,HMMPfam_EGF,HMMSmart_EGF,superfamily_SSF57196	PatternScan_ASX_HYDROXYL,HMMSmart_LamG,HMMSmart_EGF_CA,HMMPfam_EGF,HMMSmart_EGF,superfamily_ConA_like_lec_gl,HMMPfam_Laminin_G_2,PatternScan_EGF_1,PatternScan_EGF_2,PatternScan_EGF_CA,PatternScan_C_TYPE_LECTIN_1,superfamily_SSF57196	0	no_errors	MOC22	53	0	0	39	26	40	50	0	0	80	0	0
1	141354847	141354847	G	C	SNP	Aspm	NM_009791.4	mouse	genbank	58_37k	1	validated	missense	c.1651	p.D551H	0	NULL	HMMPfam_IQ,HMMSmart_IQ,HMMPfam_CH,HMMSmart_CH,superfamily_Calponin-homology,superfamily_SSF52540	0	no_errors	MOC1	13	43	76.79	71	0	0	65	0	0	70	0	0
1	141389340	141389340	A	G	SNP	Aspm	NM_009791.4	mouse	genbank	58_37k	1	validated	silent	c.9153	p.T3051	0	NULL	HMMPfam_IQ,HMMSmart_IQ,HMMPfam_CH,HMMSmart_CH,superfamily_Calponin-homology,superfamily_SSF52540	0	no_errors	MOC23	44	0	0	31	0	0	0	28	100	48	0	0
1	141413810	141413810	A	T	SNP	F13b	NM_031164.2	mouse	genbank	58_37k	1	validated	silent	c.1617	p.A539	0	HMMPfam_Sushi,HMMSmart_SM00032,superfamily_Complement control module/SCR domain	HMMPfam_Sushi,HMMSmart_SM00032,superfamily_Complement control module/SCR domain	0	no_errors	MOC23	61	0	0	79	0	0	1	64	98.46	118	0	0
1	141413840	141413840	A	T	SNP	F13b	NM_031164.2	mouse	genbank	58_37k	1	validated	silent	c.1647	p.V549	0	HMMPfam_Sushi,HMMSmart_SM00032,superfamily_Complement control module/SCR domain	HMMPfam_Sushi,HMMSmart_SM00032,superfamily_Complement control module/SCR domain	0	no_errors	MOC22	79	0	0	64	26	28.89	83	1	1.19	144	2	1.37
1	141456701	141456701	A	T	SNP	Cfhr1	NM_015780.2	mouse	genbank	58_37k	-1	validated	missense	c.35	p.V12D	0	NULL	HMMPfam_Sushi,HMMSmart_CCP,superfamily_Complement_control_module	0	no_errors	MOC22	100	0	0	37	51	57.95	91	0	0	140	0	0
1	141628207	141628207	T	A	SNP	EG214403	NM_001029977.3	mouse	genbank	58_37k	-1	validated	silent	c.2160	p.G720	0	HMMPfam_Sushi,HMMSmart_SM00032,superfamily_Complement control module/SCR domain	HMMPfam_Sushi,HMMSmart_SM00032,superfamily_Complement control module/SCR domain	0	no_errors	MOC22	204	0	0	68	115	62.5	156	0	0	292	2	0.68
1	141998254	141998254	A	T	SNP	Cfh	NM_009888.3	mouse	genbank	58_37k	-1	validated	missense	c.2933	p.V978D	0	HMMPfam_Sushi,HMMSmart_SM00032,superfamily_Complement control module/SCR domain	HMMPfam_Sushi,HMMSmart_SM00032,PatternScan_ZINC_FINGER_C2H2_1,superfamily_Complement control module/SCR domain	0	no_errors	MOC23	105	0	0	128	1	0.78	0	94	100	158	0	0
1	145593679	145593679	A	T	SNP	Glrx2	NM_001038592.1	mouse	genbank	58_37k	1	validated	silent	c.381	p.A127	0	superfamily_Thioredoxin-like	HMMPfam_Glutaredoxin,superfamily_Thioredoxin-like	0	no_errors	MOC23	101	0	0	89	0	0	1	84	98.82	119	0	0
1	145987965	145987965	T	C	SNP	Rgs13	NM_153171.4	mouse	genbank	58_37k	-1	provisional	missense	c.169	p.S57G	0	HMMPfam_RGS,HMMSmart_SM00315,superfamily_Regulator of G-protein signaling RGS	HMMPfam_RGS,HMMSmart_SM00315,superfamily_Regulator of G-protein signaling RGS	0	no_errors	MOC23	216	0	0	192	0	0	2	196	98.99	248	3	1.2
1	148267656	148267656	T	A	SNP	LOC383571	XR_033878.1	mouse	genbank	58_37k	1	model	rna	NULL	NULL	0	0	0	0	pseudogene	MOC23	23	0	0	18	0	0	0	24	100	28	1	3.45
1	148572815	148572815	C	A	SNP	LOC100043240	XM_001480180.1	mouse	genbank	58_37k	1	model	missense	c.105	p.H35Q	0	NULL	HMMPfam_zf-BED,HMMSmart_SM00614,HMMPfam_hATC	0	no_errors	MOC22	124	0	0	35	53	60.23	98	1	1.01	169	0	0
1	148573117	148573117	G	T	SNP	LOC100043240	XM_001480180.1	mouse	genbank	58_37k	1	model	missense	c.407	p.C136F	0	HMMPfam_zf-BED,HMMSmart_SM00614	HMMPfam_zf-BED,HMMSmart_SM00614,HMMPfam_hATC	0	no_errors	MOC23	3	0	0	5	0	0	0	3	100	3	0	0
1	150785119	150785119	T	A	SNP	LOC100042792	XR_033926.1	mouse	genbank	58_37k	-1	model	rna	NULL	NULL	0	0	0	0	pseudogene	MOC23	10	0	0	11	0	0	1	7	87.5	15	0	0
1	152180239	152180239	G	C	SNP	Pdc	NM_024458.2	mouse	genbank	58_37k	1	validated	missense	c.342	p.E114D	0	HMMPfam_Phosducin,superfamily_Thiordxn-like_fd	HMMPfam_Phosducin,superfamily_Thiordxn-like_fd	0	no_errors	MOC22	67	0	0	19	27	58.7	51	1	1.92	60	0	0
1	152270746	152270746	A	T	SNP	Tpr	NM_133780.3	mouse	genbank	58_37k	1	validated	missense	c.3344	p.E1115V	0	HMMPfam_TPR_MLP1_2	superfamily_Prefoldin,HMMPfam_TPR_MLP1_2	0	no_errors	MOC1	80	14	14.89	83	0	0	84	0	0	106	0	0
1	152442342	152442342	A	T	SNP	Hmcn1	ENSMUST00000074783	mouse	ensembl	58_37k	-1	known	missense	c.14800	p.W4934R	0	HMMPfam_G2F,HMMSmart_SM00682,superfamily_GFP-like	PatternScan_ASX_HYDROXYL,HMMPfam_TSP_1,HMMSmart_SM00209,superfamily_TSP-1 type 1 repeat,HMMSmart_SM00179,HMMSmart_SM00406,HMMSmart_SM00408,HMMSmart_SM00409,HMMPfam_EGF,HMMSmart_SM00181,HMMPfam_G2F,HMMSmart_SM00682,superfamily_GFP-like,PatternScan_EGF_2,HMMPfam_EGF_CA,HMMPfam_I-set,PatternScan_TYR_PHOSPHATASE_1,PatternScan_EGF_CA,superfamily_Immunoglobulin,superfamily_vWA-like,superfamily_EGF/Lami…	0	no_errors	MOC1	0	19	100	17	0	0	25	0	0	29	0	0
1	152470057	152470057	A	T	SNP	Hmcn1	ENSMUST00000074783	mouse	ensembl	58_37k	-1	known	nonsense	c.12200	p.L4067*	0	HMMSmart_SM00409,HMMPfam_I-set,superfamily_Immunoglobulin	PatternScan_ASX_HYDROXYL,HMMPfam_TSP_1,HMMSmart_SM00209,superfamily_TSP-1 type 1 repeat,HMMSmart_SM00179,HMMSmart_SM00406,HMMSmart_SM00408,HMMSmart_SM00409,HMMPfam_EGF,HMMSmart_SM00181,HMMPfam_G2F,HMMSmart_SM00682,superfamily_GFP-like,PatternScan_EGF_2,HMMPfam_EGF_CA,HMMPfam_I-set,PatternScan_TYR_PHOSPHATASE_1,PatternScan_EGF_CA,superfamily_Immunoglobulin,superfamily_vWA-like,superfamily_EGF/Lami…	0	no_errors	MOC22	124	0	0	73	29	28.43	119	0	0	162	0	0
1	152477432	152477432	A	T	SNP	Hmcn1	ENSMUST00000074783	mouse	ensembl	58_37k	-1	known	nonsense	c.11472	p.C3824*	0	HMMSmart_SM00408,HMMSmart_SM00409,HMMPfam_I-set,superfamily_Immunoglobulin	PatternScan_ASX_HYDROXYL,HMMPfam_TSP_1,HMMSmart_SM00209,superfamily_TSP-1 type 1 repeat,HMMSmart_SM00179,HMMSmart_SM00406,HMMSmart_SM00408,HMMSmart_SM00409,HMMPfam_EGF,HMMSmart_SM00181,HMMPfam_G2F,HMMSmart_SM00682,superfamily_GFP-like,PatternScan_EGF_2,HMMPfam_EGF_CA,HMMPfam_I-set,PatternScan_TYR_PHOSPHATASE_1,PatternScan_EGF_CA,superfamily_Immunoglobulin,superfamily_vWA-like,superfamily_EGF/Lami…	0	no_errors	MOC1	23	91	79.82	90	0	0	99	0	0	129	0	0
1	152655918	152655918	T	G	SNP	Hmcn1	ENSMUST00000074783	mouse	ensembl	58_37k	-1	known	missense	c.1030	p.T344P	0	NULL	PatternScan_ASX_HYDROXYL,HMMPfam_TSP_1,HMMSmart_SM00209,superfamily_TSP-1 type 1 repeat,HMMSmart_SM00179,HMMSmart_SM00406,HMMSmart_SM00408,HMMSmart_SM00409,HMMPfam_EGF,HMMSmart_SM00181,HMMPfam_G2F,HMMSmart_SM00682,superfamily_GFP-like,PatternScan_EGF_2,HMMPfam_EGF_CA,HMMPfam_I-set,PatternScan_TYR_PHOSPHATASE_1,PatternScan_EGF_CA,superfamily_Immunoglobulin,superfamily_vWA-like,superfamily_EGF/Lami…	0	no_errors	MOC22	36	0	0	44	13	22.81	57	0	0	53	0	0
1	153565411	153565411	A	T	SNP	Fam129a	NM_022018.3	mouse	genbank	58_37k	1	validated	missense	c.2113	p.T705S	0	NULL	NULL	0	no_errors	MOC22	72	0	0	54	16	22.86	71	0	0	95	0	0
1	153629539	153629539	A	C	SNP	Edem3	NM_001039644.2	mouse	genbank	58_37k	1	validated	silent	c.652	p.R218	0	HMMPfam_Glyco_hydro_47,superfamily_Seven-hairpin glycosidases	HMMPfam_Glyco_hydro_47,superfamily_Seven-hairpin glycosidases,HMMPfam_PA,superfamily_Transferrin receptor ectodomain apical domain	0	no_errors	MOC1	89	10	10.1	75	0	0	86	0	0	82	0	0
1	154603410	154603410	T	A	SNP	Apobec4	NM_001081197.1	mouse	genbank	58_37k	1	provisional	missense	c.58	p.Y20N	0	NULL	HMMPfam_APOBEC_N,PatternScan_CYT_DCMP_DEAMINASES	0	no_errors	MOC23	104	0	0	116	2	1.69	0	103	100	137	2	1.44
1	154668687	154668687	A	T	SNP	Ncf2	NM_010877.4	mouse	genbank	58_37k	1	provisional	missense	c.408	p.E136D	0	HMMPfam_TPR_1,HMMSmart_TPR,superfamily_SSF48452	HMMPfam_PB1,HMMSmart_PB1,HMMPfam_TPR_1,HMMPfam_SH3_1,HMMSmart_SH3,superfamily_SH3,HMMSmart_TPR,superfamily_SSF48452,superfamily_SSF54277	0	no_errors	MOC1	85	12	12.37	88	0	0	96	0	0	124	0	0
1	154692554	154692554	T	A	SNP	Smg7	NM_001005507.2	mouse	genbank	58_37k	-1	validated	missense	c.2150	p.Q717L	0	NULL	HMMPfam_EST1,superfamily_SSF48452	0	no_errors	MOC23	88	0	0	75	0	0	1	77	98.72	94	0	0
1	154977886	154977886	T	A	SNP	Lamc2	NM_008485.3	mouse	genbank	58_37k	-1	validated	missense	c.2648	p.N883I	0	NULL	HMMPfam_Laminin_B,HMMPfam_Laminin_EGF,HMMSmart_SM00180,PatternScan_EGF_LAM_1,HMMSmart_SM00181,PatternScan_EGF_1,PatternScan_EGF_2,HMMSmart_SM00281,superfamily_EGF/Laminin	0	no_errors	MOC1	156	28	15.22	182	0	0	176	0	0	189	0	0
1	154986887	154986887	C	A	SNP	Lamc2	NM_008485.3	mouse	genbank	58_37k	-1	validated	missense	c.1829	p.C610F	0	HMMSmart_SM00180	HMMPfam_Laminin_B,HMMPfam_Laminin_EGF,HMMSmart_SM00180,PatternScan_EGF_LAM_1,HMMSmart_SM00181,PatternScan_EGF_1,PatternScan_EGF_2,HMMSmart_SM00281,superfamily_EGF/Laminin	0	no_errors	MOC22	81	0	0	39	20	33.9	84	0	0	76	0	0
1	155097655	155097655	T	A	SNP	Lamc1	NM_010683.2	mouse	genbank	58_37k	-1	validated	splice_site	c.1422-2	e8-2	0	0	0	0	no_errors	MOC23	77	0	0	92	0	0	1	81	98.78	102	0	0
1	155306726	155306726	C	A	SNP	Dhx9	NM_007842.2	mouse	genbank	58_37k	-1	validated	silent	c.2754	p.V918	0	HMMPfam_HA2	HMMPfam_dsrm,HMMSmart_SM00358,HMMPfam_Helicase_C,HMMSmart_SM00490,PatternScan_DEAH_ATP_HELICASE,HMMPfam_HA2,HMMPfam_DEAD,HMMPfam_DUF1605,HMMSmart_SM00487,superfamily_P-loop containing nucleoside triphosphate hydrolases,superfamily_dsRNA-binding domain-like	0	no_errors	MOC23	125	0	0	109	1	0.91	4	104	96.3	109	1	0.91
1	155518905	155518905	A	T	SNP	Rgs8	NM_026380.3	mouse	genbank	58_37k	1	validated	silent	c.150	p.A50	0	superfamily_Regulat_G_prot_signal_superfam	HMMPfam_RGS,HMMSmart_RGS,superfamily_Regulat_G_prot_signal_superfam	0	no_errors	MOC22	85	0	0	50	22	30.56	81	0	0	92	0	0
1	155607993	155607993	A	T	SNP	Rnasel	NM_011882.2	mouse	genbank	58_37k	1	validated	missense	c.1988	p.K663M	0	HMMSmart_SM00580,HMMPfam_Ribonuc_2-5A	HMMSmart_SM00219,HMMPfam_Ank,HMMSmart_SM00248,superfamily_Ankyrin repeat,PatternScan_HMG_COA_REDUCTASE_1,HMMSmart_SM00220,HMMSmart_SM00580,HMMPfam_Ribonuc_2-5A,superfamily_Protein kinase-like (PK-like),HMMPfam_Pkinase	0	no_errors	MOC23	38	0	0	30	0	0	0	29	100	43	0	0
1	156333679	156333679	A	T	SNP	Cacna1e	NM_009782.3	mouse	genbank	58_37k	-1	reviewed	missense	c.1477	p.C493S	0	superfamily_Voltage-gated potassium channels	HMMPfam_Ion_trans,HMMPfam_Ca_chan_IQ,superfamily_Voltage-gated potassium channels	0	no_errors	MOC23	96	0	0	73	0	0	1	68	98.55	109	0	0
1	156979670	156979670	T	A	SNP	Mr1	NM_008209.4	mouse	genbank	58_37k	-1	provisional	missense	c.688	p.M230L	0	HMMPfam_C1-set,HMMSmart_SM00407,superfamily_Immunoglobulin	HMMPfam_MHC_I,PatternScan_IG_MHC,HMMPfam_C1-set,HMMSmart_SM00407,superfamily_MHC antigen-recognition domain,superfamily_Immunoglobulin	0	no_errors	MOC23	237	0	0	210	0	0	2	235	99.16	300	3	0.99
1	157783035	157783035	T	A	SNP	Cep350	ENSMUST00000138762	mouse	ensembl	58_37k	-1	known	nonsense	c.1288	p.K430*	0	NULL	HMMPfam_CAP_GLY,PatternScan_CAP_GLY_1,superfamily_Cap-Gly domain	0	no_errors	MOC22	164	0	0	102	48	32	172	0	0	222	1	0.45
1	158200697	158200697	T	A	SNP	Tdrd5	ENSMUST00000072556	mouse	ensembl	58_37k	-1	known	missense	c.2159	p.Q720L	0	NULL	HMMSmart_SM00333,HMMPfam_TUDOR,superfamily_Tudor/PWWP/MBT	0	no_errors	MOC22	82	0	0	51	28	35.44	81	0	0	101	0	0
1	158200698	158200698	G	T	SNP	Tdrd5	ENSMUST00000072556	mouse	ensembl	58_37k	-1	known	missense	c.2158	p.Q720K	0	NULL	HMMSmart_SM00333,HMMPfam_TUDOR,superfamily_Tudor/PWWP/MBT	0	no_errors	MOC22	84	0	0	51	28	35.44	83	0	0	98	0	0
1	158322120	158322120	T	A	SNP	9430070O13Rik	NM_001033180.2	mouse	genbank	58_37k	-1	predicted	missense	c.397	p.R133W	0	NULL	HMMPfam_Ax_dynein_light	0	no_errors	MOC22	228	0	0	80	141	63.51	236	1	0.42	264	1	0.38
1	158367862	158367862	G	C	SNP	Soat1	NM_009230.3	mouse	genbank	58_37k	-1	validated	missense	c.1060	p.L354V	0	HMMPfam_MBOAT	HMMPfam_MBOAT	0	no_errors	MOC22	67	0	0	38	17	30.91	32	0	0	61	0	0
1	158455352	158455352	C	A	SNP	LOC100039026	XM_001472047.1	mouse	genbank	58_37k	1	model	missense	c.991	p.Q331K	0	superfamily_Kinase_like	HMMSmart_S_TKc,PatternScan_PROTEIN_KINASE_ST,superfamily_Kinase_like,PatternScan_PROTEIN_KINASE_ATP,HMMPfam_Pkinase	0	no_errors	MOC1	18	95	84.07	118	0	0	114	0	0	189	0	0
1	158555688	158555688	A	T	SNP	Abl2	NM_009595.3	mouse	genbank	58_37k	1	validated	missense	c.661	p.R221W	0	HMMPfam_SH2,HMMSmart_SM00252,superfamily_SH2 domain	HMMPfam_SH2,HMMSmart_SM00252,HMMPfam_Pkinase_Tyr,HMMSmart_SM00219,HMMPfam_SH3_1,HMMSmart_SM00326,superfamily_SH3-domain,HMMSmart_SM00220,PatternScan_PROTEIN_KINASE_TYR,superfamily_Protein kinase-like (PK-like),HMMPfam_F_actin_bind,HMMSmart_SM00808,PatternScan_PROTEIN_KINASE_ATP,superfamily_SH2 domain	0	no_errors	MOC23	52	0	0	36	0	0	0	40	100	56	0	0
1	159490895	159490895	A	T	SNP	Sec16b	NM_033354.3	mouse	genbank	58_37k	1	validated	missense	c.2267	p.E756V	0	NULL	NULL	0	no_errors	MOC22	77	0	0	55	29	34.52	86	0	0	80	0	0
1	160177125	160177125	T	A	SNP	Fam5b	NM_207583.2	mouse	genbank	58_37k	-1	validated	missense	c.1556	p.Q519L	0	NULL	HMMPfam_MACPF,HMMSmart_MACPF,HMMSmart_EGF	0	no_errors	MOC22	99	0	0	32	91	73.98	127	0	0	203	1	0.49
1	160604771	160604771	G	T	SNP	Astn1	NM_007495.3	mouse	genbank	58_37k	1	validated	silent	c.3423	p.V1141	0	superfamily_Fibronectin type III	HMMSmart_SM00457,HMMSmart_SM00181,superfamily_Fibronectin type III,superfamily_EGF/Laminin	0	no_errors	MOC1	20	82	80.39	83	0	0	87	0	0	143	0	0
1	160714137	160714137	A	T	SNP	Pappa2	XM_001472777.1	mouse	genbank	58_37k	-1	model	nonsense	c.4386	p.C1462*	0	HMMSmart_SM00032,superfamily_Complement control module/SCR domain,superfamily_Metalloproteases (zincins) catalytic domain	HMMPfam_Sushi,HMMSmart_SM00032,HMMPfam_Notch,HMMSmart_SM00004,HMMSmart_SM00560,HMMPfam_Peptidase_M43,superfamily_Concanavalin A-like lectins/glucanases,superfamily_Complement control module/SCR domain,superfamily_Metalloproteases (zincins) catalytic domain	0	no_errors	MOC22	53	0	0	21	31	59.62	59	1	1.67	77	0	0
1	162612192	162612192	T	A	SNP	Rabgap1l	NM_013862.5	mouse	genbank	58_37k	-1	validated	missense	c.1445	p.Q482L	0	NULL	HMMPfam_TBC,HMMSmart_SM00164,superfamily_Ypt/Rab-GAP domain of gyp1p,HMMPfam_PID,HMMSmart_SM00462,superfamily_PH domain-like	0	no_errors	MOC23	144	0	0	113	0	0	1	105	98.13	173	0	0
1	162663767	162663767	G	T	SNP	Rabgap1l	NM_013862.5	mouse	genbank	58_37k	-1	validated	missense	c.610	p.R204S	0	HMMPfam_PID,HMMSmart_SM00462,superfamily_PH domain-like	HMMPfam_TBC,HMMSmart_SM00164,superfamily_Ypt/Rab-GAP domain of gyp1p,HMMPfam_PID,HMMSmart_SM00462,superfamily_PH domain-like	0	no_errors	MOC1	35	4	10.26	30	0	0	19	0	0	46	0	0
1	162806343	162806343	C	A	SNP	ENSMUSG00000077648	ENSMUST00000104460	mouse	ensembl	58_37k	-1	novel	rna	NULL	NULL	0	0	0	0	no_errors	MOC22	11	0	0	14	7	33.33	10	1	9.09	17	0	0
1	162893925	162893925	A	T	SNP	Rc3h1	NM_001024952.2	mouse	genbank	58_37k	1	validated	missense	c.2909	p.Q970L	0	NULL	HMMPfam_zf-CCCH,HMMSmart_SM00356,HMMSmart_SM00184,PatternScan_ZF_RING_1,HMMPfam_zf-C3HC4,superfamily_RING/U-box,superfamily_CCCH zinc finger	0	no_errors	MOC23	24	0	0	21	0	0	0	21	100	35	0	0
1	163004911	163004911	A	T	SNP	Cenpl	NM_027429.3	mouse	genbank	58_37k	1	validated	silent	c.21	p.R7	0	NULL	NULL	0	no_errors	MOC22	57	0	0	30	14	31.82	33	0	0	40	0	0
1	163081407	163081407	T	A	SNP	Ankrd45	ENSMUST00000052245	mouse	ensembl	58_37k	1	known	nonsense	c.284	p.L95*	0	HMMPfam_Ank,HMMSmart_ANK,superfamily_ANK	HMMPfam_Ank,HMMSmart_ANK,superfamily_ANK,superfamily_SSF100934	0	no_errors	MOC23	34	0	0	47	0	0	0	23	100	44	0	0
1	163081417	163081417	T	A	SNP	Ankrd45	ENSMUST00000052245	mouse	ensembl	58_37k	1	known	nonsense	c.294	p.Y98*	0	HMMPfam_Ank,HMMSmart_ANK,superfamily_ANK	HMMPfam_Ank,HMMSmart_ANK,superfamily_ANK,superfamily_SSF100934	0	no_errors	MOC22	32	0	0	11	29	72.5	24	0	0	41	0	0
1	163093416	163093416	T	G	SNP	Ankrd45	ENSMUST00000052245	mouse	ensembl	58_37k	1	known	missense	c.607	p.C203G	0	superfamily_SSF100934	HMMPfam_Ank,HMMSmart_ANK,superfamily_ANK,superfamily_SSF100934	0	no_errors	MOC23	67	0	0	71	0	0	1	67	98.53	85	0	0
1	164603780	164603780	T	A	SNP	Bat2l2	NM_001081290.1	mouse	genbank	58_37k	-1	provisional	missense	c.8294	p.Q2765L	0	NULL	HMMPfam_BAT2_N	0	no_errors	MOC22	102	0	0	66	25	27.47	98	0	0	121	0	0
1	164898992	164898992	T	A	SNP	Fmo3	NM_008030.1	mouse	genbank	58_37k	-1	provisional	silent	c.141	p.I47	0	HMMPfam_FMO-like,superfamily_FAD/NAD(P)-binding domain	HMMPfam_FMO-like,superfamily_NAD(P)-binding Rossmann-fold domains,superfamily_FAD/NAD(P)-binding domain	0	no_errors	MOC23	112	0	0	87	0	0	0	88	100	119	0	0
1	165242608	165242608	T	A	SNP	Prrx1	NM_011127.2	mouse	genbank	58_37k	-1	validated	silent	c.159	p.A53	0	NULL	HMMPfam_Homeobox,HMMSmart_SM00389,HMMPfam_OAR,superfamily_Homeodomain-like,PatternScan_HOMEOBOX_1	0	no_errors	MOC23	61	0	0	54	1	1.82	1	62	98.41	82	0	0
1	166122363	166122363	A	G	SNP	F5	NM_007976.2	mouse	genbank	58_37k	1	validated	missense	c.2275	p.N759D	0	NULL	HMMPfam_F5_F8_type_C,HMMSmart_FA58C,PatternScan_FA58C_1,PatternScan_FA58C_2,PatternScan_MULTICOPPER_OXIDASE1,superfamily_Cupredoxin,superfamily_Gal_bind_like,HMMPfam_LSPR,HMMPfam_Cu-oxidase_3	0	no_errors	MOC22	80	0	0	33	58	63.74	87	1	1.14	115	0	0
1	166123787	166123787	C	A	SNP	F5	NM_007976.2	mouse	genbank	58_37k	1	validated	missense	c.3699	p.D1233E	0	HMMPfam_LSPR	HMMPfam_F5_F8_type_C,HMMSmart_FA58C,PatternScan_FA58C_1,PatternScan_FA58C_2,PatternScan_MULTICOPPER_OXIDASE1,superfamily_Cupredoxin,superfamily_Gal_bind_like,HMMPfam_LSPR,HMMPfam_Cu-oxidase_3	0	no_errors	MOC22	273	0	0	188	75	28.52	274	0	0	368	2	0.54
1	166147598	166147598	A	T	SNP	F5	NM_007976.2	mouse	genbank	58_37k	1	validated	missense	c.6323	p.Y2108F	0	HMMPfam_F5_F8_type_C,HMMSmart_FA58C,superfamily_Gal_bind_like	HMMPfam_F5_F8_type_C,HMMSmart_FA58C,PatternScan_FA58C_1,PatternScan_FA58C_2,PatternScan_MULTICOPPER_OXIDASE1,superfamily_Cupredoxin,superfamily_Gal_bind_like,HMMPfam_LSPR,HMMPfam_Cu-oxidase_3	0	no_errors	MOC1	64	9	12.33	54	0	0	61	0	0	87	0	0
1	167440414	167440414	G	T	SNP	Adcy10	NM_173029.3	mouse	genbank	58_37k	1	validated	missense	c.465	p.L155F	0	HMMSmart_CYCc,superfamily_A/G_cyclase	HMMPfam_Guanylate_cyc,HMMSmart_CYCc,superfamily_A/G_cyclase,superfamily_SSF48452	0	no_errors	MOC23	94	0	0	99	0	0	1	88	98.88	140	0	0
1	167469911	167469911	A	T	SNP	Adcy10	NM_173029.3	mouse	genbank	58_37k	1	validated	splice_site	c.1620-2	e14-2	0	0	0	0	no_errors	MOC22	94	0	0	19	44	69.84	63	1	1.56	89	0	0
1	167481298	167481298	A	T	SNP	Adcy10	NM_173029.3	mouse	genbank	58_37k	1	validated	missense	c.2524	p.T842S	0	NULL	HMMPfam_Guanylate_cyc,HMMSmart_CYCc,superfamily_A/G_cyclase,superfamily_SSF48452	0	no_errors	MOC1	3	18	85.71	24	0	0	34	0	0	39	0	0
1	167821942	167821942	T	A	SNP	Pou2f1	NM_011137.2	mouse	genbank	58_37k	-1	validated	silent	c.1563	p.T521	0	NULL	HMMPfam_Pou,HMMSmart_SM00352,PatternScan_POU_1,PatternScan_POU_2,HMMPfam_Homeobox,HMMSmart_SM00389,superfamily_Homeodomain-like,superfamily_lambda repressor-like DNA-binding domains,PatternScan_HOMEOBOX_1	0	no_errors	MOC23	101	0	0	89	2	2.2	1	92	98.92	153	0	0
1	167839046	167839046	T	A	SNP	Pou2f1	NM_011137.2	mouse	genbank	58_37k	-1	validated	missense	c.686	p.Q229L	0	NULL	HMMPfam_Pou,HMMSmart_SM00352,PatternScan_POU_1,PatternScan_POU_2,HMMPfam_Homeobox,HMMSmart_SM00389,superfamily_Homeodomain-like,superfamily_lambda repressor-like DNA-binding domains,PatternScan_HOMEOBOX_1	0	no_errors	MOC23	82	0	0	79	0	0	0	64	100	101	0	0
1	168029304	168029304	A	T	SNP	Dusp27	NM_001033344.3	mouse	genbank	58_37k	-1	validated	missense	c.2869	p.C957S	0	NULL	HMMPfam_DSPc,PatternScan_TYR_PHOSPHATASE_1,HMMSmart_DSPc,superfamily_SSF52799	0	no_errors	MOC23	155	0	0	140	0	0	4	153	97.45	233	0	0
1	168224728	168224728	T	A	SNP	Ildr2	ENSMUST00000111416	mouse	ensembl	58_37k	1	known	missense	c.608	p.V203E	0	HMMPfam_LSR	HMMSmart_SM00409,HMMPfam_LSR,HMMPfam_V-set,superfamily_Immunoglobulin	0	no_errors	MOC22	151	0	0	48	105	67.74	169	4	2.3	247	1	0.4
1	168238051	168238051	A	T	SNP	Ildr2	ENSMUST00000111416	mouse	ensembl	58_37k	1	known	missense	c.1240	p.S414C	0	NULL	HMMSmart_SM00409,HMMPfam_LSR,HMMPfam_V-set,superfamily_Immunoglobulin	0	no_errors	MOC22	36	0	0	18	11	37.93	42	0	0	54	0	0
1	168417346	168417346	A	C	SNP	Gm4846	ENSMUST00000143922	mouse	ensembl	58_37k	-1	known	missense	c.858	p.S286R	0	HMMPfam_FMO-like,superfamily_SSF51905	HMMPfam_FMO-like,superfamily_SSF51905	0	no_errors	MOC22	152	0	0	56	82	59.42	168	0	0	220	1	0.45
1	168597281	168597281	T	A	SNP	Fmo9	NM_172844.2	mouse	genbank	58_37k	-1	provisional	missense	c.1181	p.K394I	0	HMMPfam_FMO-like	HMMPfam_FMO-like,superfamily_SSF51905	0	no_errors	MOC23	40	0	0	40	0	0	0	51	100	42	0	0
1	169561252	169561252	C	A	SNP	Rxrg	NM_009107.3	mouse	genbank	58_37k	1	validated	nonsense	c.782	p.S261*	0	superfamily_Str_ncl_receptor	HMMPfam_Hormone_recep,HMMSmart_HOLI,HMMPfam_zf-C4,HMMSmart_ZnF_C4,PatternScan_NUCLEAR_REC_DBD_1,superfamily_Str_ncl_receptor,superfamily_SSF57716	0	no_errors	MOC1	43	10	18.52	38	0	0	51	0	0	68	0	0
1	171440557	171440557	T	A	SNP	Nuf2	NM_023284.3	mouse	genbank	58_37k	-1	provisional	missense	c.781	p.T261S	0	NULL	HMMPfam_Nuf2	0	no_errors	MOC22	56	0	0	14	47	77.05	67	0	0	65	3	4.35
1	171674847	171674847	T	A	SNP	Rgs4	NM_009062.3	mouse	genbank	58_37k	-1	validated	missense	c.170	p.K57M	0	superfamily_Regulat_G_prot_signal_superfam	HMMPfam_RGS,HMMSmart_RGS,superfamily_Regulat_G_prot_signal_superfam	0	no_errors	MOC23	132	0	0	95	1	1.04	0	98	100	110	0	0
1	171675355	171675355	A	C	SNP	Rgs4	NM_009062.3	mouse	genbank	58_37k	-1	validated	missense	c.142	p.C48G	0	NULL	HMMPfam_RGS,HMMSmart_RGS,superfamily_Regulat_G_prot_signal_superfam	0	no_errors	MOC1	14	84	85.71	92	0	0	93	0	0	104	0	0
1	172575175	172575175	A	T	SNP	Olfml2b	NM_177068.4	mouse	genbank	58_37k	1	validated	missense	c.123	p.E41D	0	NULL	HMMPfam_OLF,HMMSmart_OLF	0	no_errors	MOC1	40	11	21.57	36	0	0	31	0	0	63	0	0
1	172599158	172599158	C	A	SNP	Olfml2b	NM_177068.4	mouse	genbank	58_37k	1	validated	missense	c.1226	p.T409K	0	NULL	HMMPfam_OLF,HMMSmart_OLF	0	no_errors	MOC22	200	0	0	71	160	69.26	233	1	0.43	365	0	0
1	172612295	172612295	T	A	SNP	Olfml2b	NM_177068.4	mouse	genbank	58_37k	1	validated	missense	c.2080	p.Y694N	0	HMMPfam_OLF,HMMSmart_OLF	HMMPfam_OLF,HMMSmart_OLF	0	no_errors	MOC22	189	0	0	111	42	27.45	179	0	0	196	0	0
1	172717521	172717521	T	C	SNP	Atf6	NM_001081304.1	mouse	genbank	58_37k	-1	provisional	missense	c.1633	p.I545V	0	NULL	HMMSmart_SM00338,PatternScan_BZIP_BASIC,HMMPfam_bZIP_1	0	no_errors	MOC22	86	0	0	47	28	37.33	63	1	1.56	104	0	0
1	172855704	172855704	A	T	SNP	LOC100040778	XM_001475899.1	mouse	genbank	58_37k	-1	model	silent	c.72	p.A24	0	HMMPfam_UCR_14kD,superfamily_14 kDa protein of cytochrome bc1 complex (Ubiquinol-cytochrome c reductase)	HMMPfam_UCR_14kD,superfamily_14 kDa protein of cytochrome bc1 complex (Ubiquinol-cytochrome c reductase)	0	no_errors	MOC22	219	0	0	61	103	62.8	213	1	0.47	257	0	0
1	172958168	172958168	T	A	SNP	ENSMUSG00000065905	ENSMUST00000083971	mouse	ensembl	58_37k	1	novel	rna	NULL	NULL	0	0	0	0	no_errors	MOC1	48	15	23.81	60	0	0	74	0	0	110	0	0
1	172988063	172988063	A	T	SNP	Fcgr3	NM_010188.5	mouse	genbank	58_37k	-1	validated	silent	c.105	p.A35	0	superfamily_SSF48726	HMMSmart_IG,HMMPfam_ig,superfamily_SSF48726	0	no_errors	MOC22	175	0	0	94	48	33.57	176	1	0.56	239	0	0
1	173144566	173144566	A	T	SNP	Nr1i3	NM_009803.4	mouse	genbank	58_37k	1	provisional	silent	c.87	p.T29	0	HMMPfam_zf-C4,HMMSmart_ZnF_C4,PatternScan_NUCLEAR_REC_DBD_1,superfamily_SSF57716	HMMPfam_Hormone_recep,HMMSmart_HOLI,HMMPfam_zf-C4,HMMSmart_ZnF_C4,PatternScan_NUCLEAR_REC_DBD_1,superfamily_Str_ncl_receptor,superfamily_SSF57716	0	no_errors	MOC22	188	0	0	60	94	61.04	170	1	0.58	201	1	0.5
1	173275101	173275101	T	A	SNP	Nit1	NM_012049.1	mouse	genbank	58_37k	-1	provisional	missense	c.33	p.Q11H	0	NULL	PatternScan_UPF0012,HMMPfam_CN_hydrolase,superfamily_Ntlse/CNhydtse	0	no_errors	MOC22	57	0	0	52	8	13.33	62	0	0	61	0	0
1	173290446	173290446	A	T	SNP	Klhdc9	NM_001033039.2	mouse	genbank	58_37k	-1	provisional	missense	c.347	p.V116E	0	superfamily_Gal_oxid_central,HMMPfam_Kelch_2	HMMPfam_Kelch_1,superfamily_Gal_oxid_central,HMMPfam_Kelch_2	0	no_errors	MOC22	65	0	0	22	46	66.67	79	1	1.23	100	2	1.9
1	173316881	173316881	G	T	SNP	Pvrl4	NM_027893.3	mouse	genbank	58_37k	1	validated	missense	c.1472	p.R491M	0	NULL	HMMSmart_SM00408,HMMSmart_SM00409,HMMPfam_V-set,HMMPfam_ig,HMMPfam_C2-set_2,superfamily_Immunoglobulin	0	no_errors	MOC1	15	54	78.26	53	0	0	51	0	0	78	0	0
1	173333978	173333978	A	G	SNP	Arhgap30	NM_001005508.2	mouse	genbank	58_37k	1	validated	missense	c.731	p.D244G	0	NULL	HMMPfam_RhoGAP,HMMSmart_SM00324,superfamily_GTPase activation domain GAP	0	no_errors	MOC1	15	58	79.45	93	1	1.05	104	0	0	72	0	0
1	173510893	173510893	C	T	SNP	Cd244	NM_018729.2	mouse	genbank	58_37k	1	validated	missense	c.998	p.S333F	0	NULL	HMMSmart_IG,superfamily_SSF48726	0	no_errors	MOC22	102	0	0	53	30	36.14	61	0	0	112	0	0
1	173625865	173625865	T	A	SNP	Cd48	NM_007649.4	mouse	genbank	58_37k	1	provisional	silent	c.144	p.L48	0	HMMSmart_IG,superfamily_SSF48726	HMMSmart_IG,HMMPfam_V-set,HMMPfam_ig,superfamily_SSF48726	0	no_errors	MOC22	157	0	0	46	100	68.49	145	1	0.68	165	1	0.6
1	173987495	173987495	T	A	SNP	ENSMUSG00000079182	ENSMUST00000111262	mouse	ensembl	58_37k	-1	known	missense	c.11	p.E4V	0	NULL	NULL	0	no_errors	MOC22	86	0	0	29	38	56.72	73	0	0	102	0	0
1	173987496	173987496	C	A	SNP	ENSMUSG00000079182	ENSMUST00000111262	mouse	ensembl	58_37k	-1	known	nonsense	c.10	p.E4*	0	NULL	NULL	0	no_errors	MOC22	87	0	0	29	37	56.06	70	0	0	101	0	0
1	173998399	173998399	T	A	SNP	Ncstn	NM_021607.3	mouse	genbank	58_37k	-1	validated	silent	c.1554	p.T518	0	NULL	HMMPfam_Nicastrin,PatternScan_WD_REPEATS_1,superfamily_Zn-dependent exopeptidases	0	no_errors	MOC22	118	1	0.84	88	45	33.58	108	0	0	142	1	0.7
1	174000113	174000113	T	A	SNP	Ncstn	NM_021607.3	mouse	genbank	58_37k	-1	validated	missense	c.1343	p.H448L	0	HMMPfam_Nicastrin,superfamily_Zn-dependent exopeptidases	HMMPfam_Nicastrin,PatternScan_WD_REPEATS_1,superfamily_Zn-dependent exopeptidases	0	no_errors	MOC22	56	0	0	33	15	31.25	65	0	0	80	0	0
1	174001682	174001682	C	A	SNP	Ncstn	NM_021607.3	mouse	genbank	58_37k	-1	validated	missense	c.1012	p.G338C	0	HMMPfam_Nicastrin,superfamily_Zn-dependent exopeptidases	HMMPfam_Nicastrin,PatternScan_WD_REPEATS_1,superfamily_Zn-dependent exopeptidases	0	no_errors	MOC23	76	0	0	63	0	0	0	65	100	105	0	0
1	174019284	174019284	G	C	SNP	Copa	NM_009938.4	mouse	genbank	58_37k	1	validated	missense	c.211	p.D71H	0	HMMSmart_SM00320,superfamily_WD40 repeat-like,HMMPfam_WD40	HMMSmart_SM00320,HMMPfam_Coatomer_WDAD,HMMPfam_COPI_C,superfamily_YVTN repeat-like/Quinoprotein amine dehydrogenase,superfamily_WD40 repeat-like,PatternScan_WD_REPEATS_1,HMMPfam_WD40	0	no_errors	MOC22	184	0	0	81	33	28.95	168	0	0	199	0	0
1	174102765	174102765	G	T	SNP	Dcaf8	NM_153555.2	mouse	genbank	58_37k	1	validated	missense	c.358	p.D120Y	0	superfamily_WD40 repeat-like	HMMSmart_SM00320,superfamily_WD40 repeat-like,HMMPfam_WD40	0	no_errors	MOC22	158	0	0	112	54	32.34	178	0	0	261	1	0.38
1	174145264	174145264	T	A	SNP	Casq1	NM_009813.2	mouse	genbank	58_37k	-1	validated	nonsense	c.643	p.K215*	0	HMMPfam_Calsequestrin,superfamily_Thiordxn-like_fd	HMMPfam_Calsequestrin,superfamily_Thiordxn-like_fd,PatternScan_CALSEQUESTRIN_1,PatternScan_CALSEQUESTRIN_2	0	no_errors	MOC22	100	0	0	40	29	41.43	63	0	0	103	0	0
1	174145674	174145674	T	A	SNP	Casq1	NM_009813.2	mouse	genbank	58_37k	-1	validated	missense	c.567	p.K189N	0	HMMPfam_Calsequestrin,superfamily_Thiordxn-like_fd	HMMPfam_Calsequestrin,superfamily_Thiordxn-like_fd,PatternScan_CALSEQUESTRIN_1,PatternScan_CALSEQUESTRIN_2	0	no_errors	MOC22	99	0	0	69	24	25.81	87	0	0	110	0	0
1	174161320	174161320	A	T	SNP	Atp1a4	ENSMUST00000007346	mouse	ensembl	58_37k	-1	known	silent	c.2688	p.R896	0	HMMPfam_Cation_ATPase_C,superfamily_Calcium ATPase transmembrane domain M	HMMPfam_Cation_ATPase_N,HMMPfam_Hydrolase,HMMPfam_Cation_ATPase_C,HMMPfam_E1-E2_ATPase,PatternScan_ATPASE_E1_E2,superfamily_HAD-like,superfamily_Calcium ATPase transduction domain A,superfamily_Metal cation-transporting ATPase ATP-binding domain N,superfamily_Calcium ATPase transmembrane domain M	0	no_errors	MOC1	256	38	12.93	230	0	0	281	0	0	364	0	0
1	174176819	174176819	A	T	SNP	Atp1a4	ENSMUST00000007346	mouse	ensembl	58_37k	-1	known	missense	c.997	p.F333I	0	HMMPfam_E1-E2_ATPase,superfamily_Calcium ATPase transmembrane domain M	HMMPfam_Cation_ATPase_N,HMMPfam_Hydrolase,HMMPfam_Cation_ATPase_C,HMMPfam_E1-E2_ATPase,PatternScan_ATPASE_E1_E2,superfamily_HAD-like,superfamily_Calcium ATPase transduction domain A,superfamily_Metal cation-transporting ATPase ATP-binding domain N,superfamily_Calcium ATPase transmembrane domain M	0	no_errors	MOC1	150	19	11.24	143	0	0	183	0	0	216	0	0
1	174208694	174208694	T	A	SNP	Atp1a2	NM_178405.3	mouse	genbank	58_37k	-1	validated	missense	c.2681	p.D894V	0	HMMPfam_Cation_ATPase_C,superfamily_Calcium ATPase transmembrane domain M	HMMPfam_Cation_ATPase_N,HMMPfam_Hydrolase,HMMPfam_Cation_ATPase_C,HMMPfam_E1-E2_ATPase,PatternScan_ATPASE_E1_E2,superfamily_HAD-like,superfamily_Calcium ATPase transduction domain A,superfamily_Metal cation-transporting ATPase ATP-binding domain N,superfamily_Calcium ATPase transmembrane domain M	0	no_errors	MOC22	83	0	0	46	24	33.8	67	0	0	111	0	0
1	174215896	174215896	A	T	SNP	Atp1a2	NM_178405.3	mouse	genbank	58_37k	-1	validated	silent	c.1350	p.S450	0	HMMPfam_Hydrolase,superfamily_HAD-like,superfamily_Metal cation-transporting ATPase ATP-binding domain N,superfamily_Calcium ATPase transmembrane domain M	HMMPfam_Cation_ATPase_N,HMMPfam_Hydrolase,HMMPfam_Cation_ATPase_C,HMMPfam_E1-E2_ATPase,PatternScan_ATPASE_E1_E2,superfamily_HAD-like,superfamily_Calcium ATPase transduction domain A,superfamily_Metal cation-transporting ATPase ATP-binding domain N,superfamily_Calcium ATPase transmembrane domain M	0	no_errors	MOC22	198	0	0	125	56	30.77	186	0	0	239	1	0.42
1	174414667	174414667	G	C	SNP	Igsf9	NM_033608.3	mouse	genbank	58_37k	1	validated	missense	c.48	p.Q16H	0	HMMPfam_V-set	HMMSmart_SM00408,HMMSmart_SM00409,HMMPfam_fn3,HMMSmart_SM00060,superfamily_Fibronectin type III,HMMPfam_I-set,HMMPfam_V-set,HMMPfam_ig,superfamily_Immunoglobulin	0	no_errors	MOC22	105	0	0	27	66	70.97	112	0	0	118	0	0
1	174514590	174514590	A	T	SNP	Slamf8	NM_029084.3	mouse	genbank	58_37k	-1	provisional	missense	c.548	p.V183E	0	superfamily_SSF48726	superfamily_SSF48726	0	no_errors	MOC22	223	1	0.44	123	41	24.85	214	2	0.92	258	1	0.38
1	174528972	174528972	T	A	SNP	Fcrl6	ENSMUST00000094303	mouse	ensembl	58_37k	-1	known	nonsense	c.388	p.K130*	0	superfamily_Immunoglobulin	superfamily_Immunoglobulin	0	no_errors	MOC22	77	0	0	29	51	63.75	82	0	0	96	0	0
1	174599369	174599369	A	T	SNP	LOC100040320	XR_031779.1	mouse	genbank	58_37k	-1	model	rna	NULL	NULL	0	0	0	0	no_errors	MOC1	50	10	16.67	56	0	0	60	0	0	74	0	0
1	174887548	174887548	T	A	SNP	Olfr16	NM_008763.2	mouse	genbank	58_37k	1	validated	silent	c.621	p.L207	0	HMMPfam_7tm_1,superfamily_SSF81321	HMMPfam_7tm_1,superfamily_SSF81321	0	no_errors	MOC1	111	21	15.91	163	0	0	148	0	0	219	0	0
1	175152899	175152899	A	T	SNP	Fcer1a	NM_010184.2	mouse	genbank	58_37k	-1	validated	silent	c.354	p.A118	0	HMMSmart_SM00409,HMMPfam_V-set,superfamily_Immunoglobulin	HMMSmart_SM00409,HMMPfam_V-set,HMMPfam_ig,superfamily_Immunoglobulin	0	no_errors	MOC22	51	1	1.92	18	37	66.07	48	1	2.04	57	0	0
1	175201133	175201133	A	C	SNP	Olfr418-ps1	NM_146651.2	mouse	genbank	58_37k	1	validated	missense	c.826	p.T276P	0	HMMPfam_7tm_1,superfamily_Family A G protein-coupled receptor-like	HMMPfam_7tm_1,superfamily_Family A G protein-coupled receptor-like	0	no_errors	MOC1	141	41	22.53	185	0	0	196	0	0	268	0	0
1	175262225	175262225	A	T	SNP	Darc	NM_010045.2	mouse	genbank	58_37k	-1	validated	missense	c.857	p.V286E	0	HMMPfam_7tm_1	HMMPfam_7tm_1	0	no_errors	MOC22	87	0	0	44	58	56.86	98	1	1.01	144	1	0.69
1	175276030	175276030	T	A	SNP	Cadm3	NM_053199.3	mouse	genbank	58_37k	-1	validated	splice_site	c.224-2	e3-2	0	0	0	0	no_errors	MOC23	44	0	0	35	0	0	1	40	97.56	64	1	1.54
1	175392045	175392045	A	T	SNP	Aim2	ENSMUST00000147604	mouse	ensembl	58_37k	1	known	missense	c.422	p.K141M	0	NULL	HMMPfam_PAAD_DAPIN,HMMPfam_HIN,superfamily_DEATH_like	0	no_errors	MOC22	22	0	0	18	11	37.93	26	0	0	42	0	0
1	175519986	175519986	T	A	SNP	E030037K03Rik	ENSMUST00000150649	mouse	ensembl	58_37k	-1	known	silent	c.990	p.A330	0	NULL	HMMPfam_PAAD_DAPIN	0	no_errors	MOC22	85	0	0	54	28	34.15	70	0	0	111	0	0
1	175574952	175574952	A	T	SNP	Pyhin1	NM_175026.3	mouse	genbank	58_37k	1	validated	silent	c.1227	p.T409	0	NULL	HMMPfam_PAAD_DAPIN,HMMPfam_HIN	0	no_errors	MOC22	100	0	0	58	29	33.33	66	0	0	84	0	0
1	175655152	175655152	T	A	SNP	AI607873	ENSMUST00000127730	mouse	ensembl	58_37k	-1	known	silent	c.2808	p.P936	0	HMMPfam_HIN	HMMPfam_PAAD_DAPIN,HMMPfam_HIN	0	no_errors	MOC23	75	0	0	60	1	1.64	2	60	96.77	97	0	0
1	175728339	175728339	T	G	SNP	Ifi203	ENSMUST00000111210	mouse	ensembl	58_37k	-1	known	silent	c.64	p.R22	0	HMMPfam_PAAD_DAPIN,superfamily_DEATH domain	HMMPfam_PAAD_DAPIN,HMMPfam_HIN,superfamily_DEATH domain	0	no_errors	MOC1	36	11	23.4	43	0	0	36	0	0	47	0	0
1	176019200	176019200	A	T	SNP	Olfr429	NM_146722.2	mouse	genbank	58_37k	1	validated	missense	c.28	p.I10L	0	superfamily_SSF81321	HMMPfam_7tm_1,PatternScan_G_PROTEIN_RECEP_F1_1,superfamily_SSF81321	0	no_errors	MOC23	70	0	0	67	0	0	3	65	95.59	85	0	0
1	176089832	176089832	A	T	SNP	Olfr420	NM_146305.2	mouse	genbank	58_37k	1	validated	missense	c.927	p.Q309H	0	superfamily_Family A G protein-coupled receptor-like	HMMPfam_7tm_1,PatternScan_G_PROTEIN_RECEP_F1_1,superfamily_Family A G protein-coupled receptor-like	0	no_errors	MOC23	111	0	0	95	0	0	2	94	97.92	124	1	0.8
1	176171265	176171265	C	G	SNP	Spna1	NM_011465.4	mouse	genbank	58_37k	1	validated	missense	c.6499	p.Q2167E	0	HMMPfam_Spectrin,HMMSmart_SPEC,superfamily_Spectrin	HMMPfam_SH3_1,HMMSmart_SH3,superfamily_SH3,HMMPfam_Spectrin,HMMPfam_efhand_Ca_insen,HMMSmart_SPEC,superfamily_Spectrin,superfamily_SSF47473	0	no_errors	MOC22	69	0	0	17	39	69.64	54	0	0	67	0	0
1	176321851	176321851	T	A	SNP	Olfr248	NM_146714.2	mouse	genbank	58_37k	1	validated	missense	c.650	p.V217E	0	HMMPfam_7tm_1,superfamily_Family A G protein-coupled receptor-like	HMMPfam_7tm_1,PatternScan_G_PROTEIN_RECEP_F1_1,superfamily_Family A G protein-coupled receptor-like	0	no_errors	MOC22	126	0	0	36	66	64.71	117	0	0	183	0	0
1	176433694	176433694	A	C	SNP	Fmn2	NM_019445.2	mouse	genbank	58_37k	1	validated	silent	c.1518	p.T506	0	NULL	HMMSmart_SM00498,HMMPfam_Drf_FH1,HMMPfam_FH2,superfamily_Formin homology 2 domain (FH2 domain)	0	no_errors	MOC22	54	0	0	46	23	33.33	52	1	1.89	98	0	0
1	177083337	177083337	A	T	SNP	Rgs7	NM_011880.3	mouse	genbank	58_37k	-1	validated	missense	c.251	p.L84Q	0	HMMPfam_DEP,HMMSmart_SM00049,superfamily_Winged helix DNA-binding domain	HMMPfam_RGS,HMMSmart_SM00315,HMMPfam_DEP,HMMSmart_SM00049,HMMPfam_G-gamma,HMMSmart_SM00224,superfamily_Transducin (heterotrimeric G protein) gamma chain,superfamily_Regulator of G-protein signaling RGS,superfamily_Winged helix DNA-binding domain	0	no_errors	MOC22	49	0	0	52	25	32.47	60	0	0	73	0	0
1	177720074	177720074	G	T	SNP	Wdr64	ENSMUST00000027805	mouse	ensembl	58_37k	1	known	missense	c.435	p.L145F	0	superfamily_WD40 repeat-like	HMMSmart_SM00320,superfamily_WD40 repeat-like,PatternScan_WD_REPEATS_1,HMMPfam_WD40	0	no_errors	MOC1	106	21	16.54	124	0	0	111	0	0	178	0	0
1	177738903	177738903	T	C	SNP	Wdr64	ENSMUST00000094288	mouse	ensembl	58_37k	1	known	silent	c.2955	p.S985	0	NULL	HMMSmart_SM00320,superfamily_WD40 repeat-like,PatternScan_WD_REPEATS_1,HMMPfam_WD40	0	no_stop_codon	MOC22	64	0	0	26	45	63.38	54	0	0	98	0	0
1	177909018	177909018	T	C	SNP	B020018G12Rik	NM_001039518.2	mouse	genbank	58_37k	-1	validated	missense	c.23	p.H8R	0	NULL	HMMPfam_RRM_1,HMMSmart_SM00360,superfamily_RNA-binding domain RBD	0	no_errors	MOC22	58	0	0	26	15	36.59	45	0	0	73	0	0
1	178704878	178704878	T	A	SNP	Cep170	XM_989868.2	mouse	genbank	58_37k	-1	model	missense	c.792	p.K264N	0	NULL	HMMPfam_FHA,HMMSmart_SM00240,superfamily_SMAD/FHA domain	0	no_errors	MOC23	42	0	0	39	0	0	0	41	100	44	2	4.35
1	179810096	179810096	A	T	SNP	EG631584	XM_982472.2	mouse	genbank	58_37k	1	model	missense	c.1318	p.S440C	0	NULL	NULL	0	no_errors	MOC22	116	0	0	78	41	34.45	128	0	0	140	0	0
1	179867784	179867784	T	G	SNP	EG631584	XM_982472.2	mouse	genbank	58_37k	1	model	silent	c.1794	p.L598	0	NULL	NULL	0	no_errors	MOC1	209	23	9.91	204	0	0	210	0	0	278	0	0
1	180079078	180079078	A	T	SNP	Gm16432	ENSMUST00000111149	mouse	ensembl	58_37k	1	known	missense	c.2458	p.R820W	0	NULL	NULL	0	no_errors	MOC1	257	47	15.46	284	0	0	322	0	0	433	0	0
1	181341847	181341847	C	A	SNP	Smyd3	NM_027188.3	mouse	genbank	58_37k	-1	provisional	missense	c.298	p.D100Y	0	HMMSmart_SET,superfamily_SSF82199	HMMPfam_SET,HMMSmart_SET,HMMPfam_zf-MYND,PatternScan_ZF_MYND_1,superfamily_SSF82199	0	no_errors	MOC1	176	25	12.44	216	0	0	219	1	0.45	288	1	0.35
1	181540396	181540396	G	T	SNP	Cnst	NM_146105.3	mouse	genbank	58_37k	1	provisional	nonsense	c.1393	p.E465*	0	NULL	NULL	0	no_errors	MOC22	68	0	0	19	40	67.8	35	0	0	73	0	0
1	181713084	181713084	T	A	SNP	Ahctf1	NM_026375.2	mouse	genbank	58_37k	-1	validated	missense	c.1798	p.R600W	0	NULL	HMMPfam_AT_hook	0	no_errors	MOC22	142	0	0	48	85	63.91	138	1	0.72	181	1	0.55
1	181855533	181855533	T	C	SNP	LOC100042190	XR_033682.1	mouse	genbank	58_37k	-1	model	rna	NULL	NULL	0	0	0	0	pseudogene	MOC23	271	0	0	233	2	0.85	6	224	97.39	362	1	0.28
1	182989890	182989890	A	G	SNP	9130409I23Rik	NM_001033819.2	mouse	genbank	58_37k	1	predicted	missense	c.908	p.D303G	0	NULL	HMMPfam_FA_desaturase,PatternScan_ZINC_PROTEASE,HMMPfam_Lipid_DES	0	no_errors	MOC22	81	0	0	59	18	23.08	67	2	2.9	79	0	0
1	183336618	183336618	A	T	SNP	Cnih3	NM_028408.3	mouse	genbank	58_37k	1	validated	silent	c.102	p.L34	0	HMMPfam_Cornichon,PatternScan_CORNICHON	HMMPfam_Cornichon,PatternScan_CORNICHON	0	no_errors	MOC1	133	30	18.4	149	0	0	184	0	0	266	1	0.37
1	183380144	183380144	T	G	SNP	Cnih3	NM_028408.3	mouse	genbank	58_37k	1	validated	missense	c.299	p.M100R	0	HMMPfam_Cornichon	HMMPfam_Cornichon,PatternScan_CORNICHON	0	no_errors	MOC22	178	0	0	111	50	31.06	148	0	0	251	0	0
1	183677382	183677382	C	A	SNP	Dnahc14	ENSMUST00000060610	mouse	ensembl	58_37k	1	known	missense	c.436	p.L146M	0	NULL	NULL	0	no_stop_codon	MOC23	75	0	0	58	0	0	2	64	96.97	65	0	0
1	184209631	184209631	T	A	SNP	Degs1	NM_007853.4	mouse	genbank	58_37k	-1	provisional	nonsense	c.301	p.K101*	0	HMMPfam_FA_desaturase	HMMPfam_FA_desaturase,HMMPfam_Lipid_DES	0	no_errors	MOC1	6	53	89.83	61	0	0	64	0	0	60	0	0
1	184378677	184378677	G	T	SNP	Trp53bp2	NM_173378.2	mouse	genbank	58_37k	1	validated	missense	c.2091	p.R697S	0	NULL	HMMPfam_SH3_1,HMMSmart_SM00326,HMMPfam_Ank,HMMSmart_SM00248,superfamily_Ankyrin repeat	0	no_errors	MOC1	11	67	85.9	55	0	0	76	0	0	97	0	0
1	184678870	184678870	C	A	SNP	4922505E12Rik	NM_001033547.2	mouse	genbank	58_37k	-1	validated	silent	c.384	p.P128	0	NULL	NULL	0	no_errors	MOC23	83	1	1.19	67	0	0	0	71	100	115	0	0
1	184903860	184903860	T	A	SNP	Tlr5	NM_016928.2	mouse	genbank	58_37k	1	provisional	silent	c.597	p.T199	0	HMMSmart_SM00369,superfamily_L domain-like	HMMPfam_TIR,HMMSmart_SM00255,superfamily_Toll/Interleukin receptor TIR domain,HMMSmart_SM00082,HMMPfam_LRR_1,HMMSmart_SM00369,superfamily_L domain-like	0	no_errors	MOC22	77	0	0	42	61	58.65	74	0	0	98	1	1.01
1	186441200	186441200	T	A	SNP	ENSMUSG00000059483	ENSMUST00000076314	mouse	ensembl	58_37k	1	known	missense	c.74	p.V25D	0	HMMPfam_Ribosomal_L21e,superfamily_Translation proteins SH3-like domain	HMMPfam_Ribosomal_L21e,superfamily_Translation proteins SH3-like domain,PatternScan_RIBOSOMAL_L21E	0	no_errors	MOC1	54	208	79.39	269	0	0	256	0	0	368	0	0
1	186555713	186555713	A	G	SNP	Hlx	NM_008250.2	mouse	genbank	58_37k	-1	validated	missense	c.308	p.V103A	0	NULL	HMMPfam_Homeobox,HMMSmart_SM00389,superfamily_Homeodomain-like,PatternScan_HOMEOBOX_1	0	no_errors	MOC22	62	0	0	18	27	58.7	58	0	0	63	0	0
1	186634762	186634762	T	C	SNP	Mosc1	NM_001081361.1	mouse	genbank	58_37k	-1	provisional	missense	c.247	p.T83A	0	HMMPfam_MOSC_N,superfamily_PK beta-barrel domain-like	HMMPfam_MOSC,HMMPfam_MOSC_N,superfamily_PK beta-barrel domain-like	0	no_errors	MOC23	51	0	0	60	0	0	2	59	96.72	99	0	0
1	187056924	187056924	A	T	SNP	Rab3gap2	ENSMUST00000069652	mouse	ensembl	58_37k	1	known	missense	c.262	p.M88L	0	NULL	NULL	0	no_errors	MOC1	69	12	14.81	93	0	0	97	0	0	86	0	0
1	187059380	187059380	A	T	SNP	Rab3gap2	ENSMUST00000069652	mouse	ensembl	58_37k	1	known	missense	c.502	p.T168S	0	NULL	NULL	0	no_errors	MOC1	142	29	16.96	143	0	0	169	0	0	258	0	0
1	187203614	187203614	A	T	SNP	Eprs	NM_029735.1	mouse	genbank	58_37k	1	validated	missense	c.941	p.N314I	0	HMMPfam_tRNA-synt_1c,superfamily_Nucleotidylyl transferase	HMMPfam_WHEP-TRS,PatternScan_WHEP_TRS_1,PatternScan_AA_TRNA_LIGASE_I,HMMPfam_tRNA-synt_2b,HMMPfam_HGTP_anticodon,superfamily_Anticodon-binding domain of Class II aaRS,superfamily_S15/NS1 RNA-binding domain,superfamily_Glutathione S-transferase (GST) C-terminal domain,superfamily_Ribosomal protein L25-like,HMMPfam_ProRS-C_1,superfamily_C-terminal domain of ProRS,HMMPfam_tRNA-synt_1c,HMMPfam_tRNA-s…	0	no_errors	MOC22	85	0	0	17	32	65.31	61	2	3.17	78	1	1.27
1	187287995	187287995	A	T	SNP	Slc30a10	NM_001033286.2	mouse	genbank	58_37k	1	validated	missense	c.974	p.H325L	0	HMMPfam_Cation_efflux	HMMPfam_Cation_efflux	0	no_errors	MOC22	158	0	0	31	72	69.9	120	0	0	164	0	0
1	188784472	188784472	A	T	SNP	LOC100042375	XR_033497.1	mouse	genbank	58_37k	1	model	rna	NULL	NULL	0	0	0	0	pseudogene	MOC22	160	0	0	138	81	36.99	184	0	0	320	0	0
1	188784848	188784848	C	T	SNP	LOC100042375	XR_033497.1	mouse	genbank	58_37k	1	model	rna	NULL	NULL	0	0	0	0	pseudogene	MOC22	178	0	0	110	59	34.71	165	0	0	228	0	0
1	189049728	189049728	A	T	SNP	Gpatch2	NM_026367.4	mouse	genbank	58_37k	1	validated	missense	c.400	p.S134C	0	NULL	HMMPfam_G-patch,HMMSmart_SM00443	0	no_errors	MOC22	63	0	0	26	53	67.09	78	1	1.27	112	0	0
1	189890317	189890317	A	T	SNP	Esrrg	NM_011935.2	mouse	genbank	58_37k	1	provisional	missense	c.570	p.K190N	0	HMMPfam_zf-C4,HMMSmart_SM00399,superfamily_Nuclear receptor ligand-binding domain,superfamily_Glucocorticoid receptor-like (DNA-binding domain)	HMMPfam_Hormone_recep,HMMSmart_SM00430,HMMPfam_zf-C4,HMMSmart_SM00399,PatternScan_NUCLEAR_REC_DBD_1,superfamily_Nuclear receptor ligand-binding domain,superfamily_Glucocorticoid receptor-like (DNA-binding domain)	0	no_errors	MOC22	74	0	0	62	22	26.19	81	0	0	115	0	0
1	190267057	190267057	G	T	SNP	Ush2a	NM_021408.3	mouse	genbank	58_37k	1	validated	missense	c.3472	p.G1158C	0	HMMPfam_fn3,HMMSmart_SM00060,superfamily_Concanavalin A-like lectins/glucanases	HMMSmart_SM00282,HMMPfam_Laminin_EGF,HMMSmart_SM00180,PatternScan_EGF_LAM_1,HMMPfam_fn3,HMMSmart_SM00060,HMMSmart_SM00560,HMMSmart_SM00136,superfamily_Fibronectin type III,superfamily_Concanavalin A-like lectins/glucanases,HMMPfam_Laminin_G_2,PatternScan_EGF_1,superfamily_EGF/Laminin	0	no_errors	MOC22	119	0	0	48	76	61.29	135	2	1.46	182	0	0
1	190730503	190730503	T	A	SNP	Ush2a	NM_021408.3	mouse	genbank	58_37k	1	validated	missense	c.12230	p.L4077Q	0	HMMPfam_fn3,HMMSmart_SM00060,superfamily_Fibronectin type III	HMMSmart_SM00282,HMMPfam_Laminin_EGF,HMMSmart_SM00180,PatternScan_EGF_LAM_1,HMMPfam_fn3,HMMSmart_SM00060,HMMSmart_SM00560,HMMSmart_SM00136,superfamily_Fibronectin type III,superfamily_Concanavalin A-like lectins/glucanases,HMMPfam_Laminin_G_2,PatternScan_EGF_1,superfamily_EGF/Laminin	0	no_errors	MOC23	63	0	0	61	0	0	5	68	93.15	90	1	1.1
1	190734620	190734620	T	G	SNP	Ush2a	NM_021408.3	mouse	genbank	58_37k	1	validated	missense	c.12299	p.L4100R	0	HMMPfam_fn3,HMMSmart_SM00060,superfamily_Fibronectin type III	HMMSmart_SM00282,HMMPfam_Laminin_EGF,HMMSmart_SM00180,PatternScan_EGF_LAM_1,HMMPfam_fn3,HMMSmart_SM00060,HMMSmart_SM00560,HMMSmart_SM00136,superfamily_Fibronectin type III,superfamily_Concanavalin A-like lectins/glucanases,HMMPfam_Laminin_G_2,PatternScan_EGF_1,superfamily_EGF/Laminin	0	no_errors	MOC22	89	0	0	63	32	33.68	68	0	0	131	0	0
1	190734987	190734987	G	T	SNP	Ush2a	NM_021408.3	mouse	genbank	58_37k	1	validated	silent	c.12666	p.L4222	0	HMMPfam_fn3,HMMSmart_SM00060,superfamily_Fibronectin type III	HMMSmart_SM00282,HMMPfam_Laminin_EGF,HMMSmart_SM00180,PatternScan_EGF_LAM_1,HMMPfam_fn3,HMMSmart_SM00060,HMMSmart_SM00560,HMMSmart_SM00136,superfamily_Fibronectin type III,superfamily_Concanavalin A-like lectins/glucanases,HMMPfam_Laminin_G_2,PatternScan_EGF_1,superfamily_EGF/Laminin	0	no_errors	MOC22	61	0	0	17	48	73.85	54	0	0	87	0	0
1	191472932	191472932	C	G	SNP	Cenpf	NM_001081363.2	mouse	genbank	58_37k	-1	validated	missense	c.8142	p.M2714I	0	NULL	superfamily_Prefoldin,HMMPfam_Rb-bdg_C_Cenp-F,HMMPfam_Cenp-F_N,HMMPfam_Cenp-F_leu_zip	0	no_errors	MOC1	43	7	14	47	0	0	39	0	0	44	0	0
1	191481756	191481756	T	A	SNP	Cenpf	NM_001081363.2	mouse	genbank	58_37k	-1	validated	nonsense	c.3730	p.K1244*	0	NULL	superfamily_Prefoldin,HMMPfam_Rb-bdg_C_Cenp-F,HMMPfam_Cenp-F_N,HMMPfam_Cenp-F_leu_zip	0	no_errors	MOC1	83	16	16.16	74	0	0	95	0	0	116	0	0
1	191674440	191674440	A	C	SNP	Ptpn14	NM_008976.2	mouse	genbank	58_37k	1	validated	missense	c.1604	p.H535P	0	NULL	HMMPfam_Y_phosphatase,HMMSmart_SM00194,HMMSmart_SM00404,PatternScan_TYR_PHOSPHATASE_1,HMMPfam_FERM_N,PatternScan_FERM_1,PatternScan_FERM_2,HMMPfam_FERM_M,superfamily_Second domain of FERM,HMMSmart_SM00295,superfamily_PH domain-like,superfamily_(Phosphotyrosine protein) phosphatases II,superfamily_Ubiquitin-like	0	no_errors	MOC22	102	0	0	70	36	33.96	120	0	0	176	0	0
1	191674805	191674805	A	G	SNP	Ptpn14	NM_008976.2	mouse	genbank	58_37k	1	validated	missense	c.1969	p.M657V	0	NULL	HMMPfam_Y_phosphatase,HMMSmart_SM00194,HMMSmart_SM00404,PatternScan_TYR_PHOSPHATASE_1,HMMPfam_FERM_N,PatternScan_FERM_1,PatternScan_FERM_2,HMMPfam_FERM_M,superfamily_Second domain of FERM,HMMSmart_SM00295,superfamily_PH domain-like,superfamily_(Phosphotyrosine protein) phosphatases II,superfamily_Ubiquitin-like	0	no_errors	MOC22	65	0	0	42	13	23.64	48	0	0	71	0	0
1	191947286	191947286	T	C	SNP	Prox1	NM_008937.2	mouse	genbank	58_37k	-1	provisional	splice_site	c.2029-2	e4-2	0	0	0	0	no_errors	MOC22	68	0	0	24	12	33.33	41	0	0	53	0	0
1	191984465	191984465	A	T	SNP	Prox1	NM_008937.2	mouse	genbank	58_37k	-1	provisional	missense	c.1661	p.L554H	0	HMMPfam_Prox1	HMMPfam_Prox1,superfamily_Homeodomain_like	0	no_errors	MOC23	83	0	0	63	0	0	2	70	97.22	99	2	1.98
1	191984612	191984612	G	T	SNP	Prox1	NM_008937.2	mouse	genbank	58_37k	-1	provisional	nonsense	c.1514	p.S505*	0	HMMPfam_Prox1	HMMPfam_Prox1,superfamily_Homeodomain_like	0	no_errors	MOC1	14	49	77.78	77	0	0	80	0	0	84	0	0
1	191985336	191985336	T	G	SNP	Prox1	NM_008937.2	mouse	genbank	58_37k	-1	provisional	missense	c.790	p.T264P	0	HMMPfam_Prox1	HMMPfam_Prox1,superfamily_Homeodomain_like	0	no_errors	MOC23	140	0	0	138	1	0.72	1	157	99.37	209	0	0
1	192723337	192723337	T	A	SNP	Rps6kc1	NM_178775.4	mouse	genbank	58_37k	-1	validated	silent	c.219	p.T73	0	superfamily_PX domain	HMMPfam_PX,superfamily_PX domain,HMMPfam_MIT,HMMSmart_SM00745,superfamily_Protein kinase-like (PK-like),HMMPfam_Pkinase	0	no_errors	MOC1	130	23	15.03	144	0	0	143	0	0	181	0	0
1	192844995	192844995	T	A	SNP	Mfsd7b	NM_001081259.1	mouse	genbank	58_37k	-1	provisional	silent	c.858	p.T286	0	HMMPfam_MFS_1,superfamily_MFS_gen_substrate_transporter	HMMPfam_MFS_1,superfamily_MFS_gen_substrate_transporter	0	no_errors	MOC23	87	0	0	77	0	0	2	71	97.26	82	0	0
1	193162703	193162703	A	T	SNP	Tmem206	NM_025864.3	mouse	genbank	58_37k	1	provisional	missense	c.176	p.K59M	0	NULL	NULL	0	no_errors	MOC22	138	0	0	82	24	22.64	112	1	0.88	139	1	0.71
1	193543475	193543475	G	T	SNP	Lpgat1	NM_172266.3	mouse	genbank	58_37k	1	validated	missense	c.216	p.W72C	0	superfamily_SSF69593	HMMSmart_PlsC,superfamily_SSF69593	0	no_errors	MOC22	93	1	1.05	40	59	59.6	89	1	1.11	123	1	0.81
1	193584080	193584080	A	T	SNP	Lpgat1	NM_172266.3	mouse	genbank	58_37k	1	validated	silent	c.681	p.A227	0	NULL	HMMSmart_PlsC,superfamily_SSF69593	0	no_errors	MOC1	21	54	72	53	0	0	71	0	0	65	0	0
1	193653310	193653310	A	T	SNP	Nek2	NM_010892.3	mouse	genbank	58_37k	1	validated	missense	c.1025	p.E342V	0	NULL	HMMSmart_S_TKc,PatternScan_PROTEIN_KINASE_ST,superfamily_Kinase_like,HMMPfam_Pkinase	0	no_errors	MOC22	49	0	0	13	20	60.61	42	0	0	42	0	0
1	193733452	193733452	A	G	SNP	Slc30a1	NM_009579.3	mouse	genbank	58_37k	1	validated	missense	c.1330	p.T444A	0	NULL	HMMPfam_Cation_efflux	0	no_errors	MOC23	149	0	0	125	1	0.79	0	114	100	163	2	1.21
1	193807171	193807171	T	A	SNP	Rd3	NM_023727.3	mouse	genbank	58_37k	1	validated	missense	c.25	p.W9R	0	NULL	NULL	0	no_errors	MOC23	64	0	0	36	0	0	1	52	98.11	62	0	0
1	193823821	193823821	T	A	SNP	Traf5	ENSMUST00000085573	mouse	ensembl	58_37k	-1	known	silent	c.957	p.S319	0	NULL	HMMPfam_zf-TRAF,HMMSmart_SM00184,HMMPfam_MATH,HMMSmart_SM00061,superfamily_TRAF domain-like,PatternScan_ZF_RING_1,HMMPfam_zf-C3HC4,superfamily_RING/U-box	0	no_errors	MOC22	210	0	0	70	126	64.29	196	1	0.51	263	0	0
1	194065838	194065838	A	T	SNP	Kcnh1	NM_010600.2	mouse	genbank	58_37k	1	validated	silent	c.477	p.T159	0	NULL	HMMPfam_cNMP_binding,HMMSmart_SM00100,HMMSmart_SM00086,HMMPfam_Ion_trans,HMMPfam_PAS,superfamily_cAMP-binding domain-like,superfamily_PYP-like sensor domain (PAS domain),superfamily_Voltage-gated potassium channels	0	no_errors	MOC22	50	0	0	26	15	36.59	59	0	0	69	0	0
1	194659749	194659749	T	A	SNP	A730013G03Rik	ENSMUST00000057543	mouse	ensembl	58_37k	-1	known	missense	c.331	p.T111S	0	NULL	NULL	0	no_errors	MOC1	14	48	77.42	70	0	0	64	0	0	88	0	0
1	194675958	194675958	C	G	SNP	Sertad4	NM_198247.2	mouse	genbank	58_37k	-1	validated	missense	c.260	p.S87T	0	NULL	HMMPfam_SERTA	0	no_errors	MOC22	42	0	0	20	10	33.33	45	0	0	42	0	0
1	194714915	194714915	T	A	SNP	LOC100039677	XR_031150.1	mouse	genbank	58_37k	1	model	rna	NULL	NULL	0	0	0	0	pseudogene	MOC22	47	0	0	15	21	58.33	42	0	0	49	0	0
1	195174635	195174635	A	C	SNP	Camk1g	NM_144817.2	mouse	genbank	58_37k	-1	validated	missense	c.959	p.L320R	0	superfamily_Kinase_like	HMMSmart_S_TKc,PatternScan_PROTEIN_KINASE_ST,superfamily_Kinase_like,PatternScan_PROTEIN_KINASE_ATP,HMMPfam_Pkinase	0	no_errors	MOC22	81	0	0	28	48	63.16	104	0	0	118	0	0
1	195180256	195180256	A	T	SNP	Camk1g	NM_144817.2	mouse	genbank	58_37k	-1	validated	silent	c.489	p.T163	0	HMMSmart_S_TKc,superfamily_Kinase_like,HMMPfam_Pkinase	HMMSmart_S_TKc,PatternScan_PROTEIN_KINASE_ST,superfamily_Kinase_like,PatternScan_PROTEIN_KINASE_ATP,HMMPfam_Pkinase	0	no_errors	MOC22	93	0	0	55	30	35.29	132	0	0	105	0	0
1	196631166	196631166	A	T	SNP	Plxna2	NM_008882.2	mouse	genbank	58_37k	1	validated	missense	c.4834	p.S1612C	0	superfamily_Rho_GAP,HMMPfam_Plexin_cytopl	HMMPfam_Sema,HMMSmart_Sema,superfamily_Sema,HMMPfam_PSI,HMMPfam_TIG,HMMSmart_IPT,HMMSmart_PSI,superfamily_Rho_GAP,HMMPfam_Plexin_cytopl,superfamily_Ig_E-set,superfamily_Plexin-like_fold	0	no_errors	MOC1	226	48	17.45	237	0	0	394	0	0	349	0	0
1	196937281	196937281	T	G	SNP	Cr1l	NM_013499.2	mouse	genbank	58_37k	-1	validated	missense	c.1165	p.K389Q	0	NULL	HMMPfam_Sushi,HMMSmart_CCP,superfamily_Complement_control_module	0	no_errors	MOC22	83	0	0	27	56	67.47	125	0	0	107	1	0.93
1	196980447	196980447	A	T	SNP	Cr2	NM_007758.2	mouse	genbank	58_37k	-1	validated	silent	c.2601	p.A867	0	HMMPfam_Sushi,HMMSmart_CCP,superfamily_Complement_control_module	HMMPfam_Sushi,HMMSmart_CCP,superfamily_Complement_control_module	0	no_errors	MOC22	91	0	0	26	32	55.17	94	0	0	85	0	0
2	3603692	3603692	C	A	SNP	LOC666495	XR_031723.1	mouse	genbank	58_37k	1	model	rna	NULL	NULL	0	0	0	0	pseudogene	MOC1	8	7	46.67	16	0	0	14	0	0	17	0	0
2	4817747	4817747	A	T	SNP	Sephs1	NM_175400.6	mouse	genbank	58_37k	1	validated	silent	c.573	p.A191	0	superfamily_PurM C-terminal domain-like	HMMPfam_AIRS,HMMPfam_AIRS_C,superfamily_PurM C-terminal domain-like,superfamily_PurM N-terminal domain-like	0	no_errors	MOC1	106	69	39.43	169	1	0.59	114	0	0	175	0	0
2	4918322	4918322	T	A	SNP	Mcm10	NM_027290.3	mouse	genbank	58_37k	-1	validated	missense	c.1841	p.Q614L	0	HMMPfam_Mcm10	HMMPfam_zf-primase,HMMPfam_Mcm10	0	no_errors	MOC1	53	22	29.33	75	0	0	65	0	0	75	0	0
2	4919634	4919634	T	A	SNP	Mcm10	NM_027290.3	mouse	genbank	58_37k	-1	validated	missense	c.1730	p.Q577L	0	HMMPfam_Mcm10	HMMPfam_zf-primase,HMMPfam_Mcm10	0	no_errors	MOC23	157	0	0	199	0	0	55	86	60.99	194	1	0.51
2	4921963	4921963	A	G	SNP	Mcm10	NM_027290.3	mouse	genbank	58_37k	-1	validated	missense	c.1406	p.L469P	0	NULL	HMMPfam_zf-primase,HMMPfam_Mcm10	0	no_errors	MOC23	179	0	0	197	1	0.51	100	62	38.27	232	0	0
2	4925080	4925080	T	A	SNP	Mcm10	NM_027290.3	mouse	genbank	58_37k	-1	validated	missense	c.1123	p.M375L	0	NULL	HMMPfam_zf-primase,HMMPfam_Mcm10	0	no_errors	MOC1	64	47	42.34	102	0	0	91	0	0	112	0	0
2	4929700	4929700	T	A	SNP	Mcm10	NM_027290.3	mouse	genbank	58_37k	-1	validated	missense	c.166	p.T56S	0	NULL	HMMPfam_zf-primase,HMMPfam_Mcm10	0	no_errors	MOC23	375	0	0	403	2	0.49	144	208	59.09	518	0	0
2	5062397	5062397	A	C	SNP	Ccdc3	NM_028804.1	mouse	genbank	58_37k	1	provisional	missense	c.495	p.Q165H	0	NULL	NULL	0	no_errors	MOC22	195	0	0	93	100	51.81	173	2	1.14	219	0	0
2	5763033	5763033	G	T	SNP	Cdc123	NM_133837.4	mouse	genbank	58_37k	-1	provisional	missense	c.112	p.L38I	0	HMMPfam_D123	HMMPfam_D123	0	no_errors	MOC23	107	0	0	84	0	0	45	38	45.78	87	0	0
2	6053331	6053331	T	C	SNP	LOC634939	XR_031822.1	mouse	genbank	58_37k	-1	model	rna	NULL	NULL	0	0	0	0	pseudogene	MOC22	102	0	0	48	39	44.83	64	0	0	87	0	0
2	6054991	6054991	A	G	SNP	LOC634939	XR_031822.1	mouse	genbank	58_37k	-1	model	rna	NULL	NULL	0	0	0	0	pseudogene	MOC22	39	0	0	17	21	55.26	37	0	0	36	2	5.26
2	6116785	6116785	C	G	SNP	Echdc3	NM_024208.4	mouse	genbank	58_37k	-1	provisional	missense	c.435	p.M145I	0	HMMPfam_ECH,superfamily_SSF52096	HMMPfam_ECH,PatternScan_ENOYL_COA_HYDRATASE,superfamily_SSF52096	0	no_errors	MOC23	85	0	0	84	0	0	33	19	36.54	86	0	0
2	8956604	8956604	T	A	SNP	ENSMUSG00000075537	ENSMUST00000100425	mouse	ensembl	58_37k	-1	known	missense	c.190	p.T64S	0	NULL	NULL	0	no_errors	MOC22	14	0	0	18	13	41.94	13	0	0	22	0	0
2	9839798	9839798	T	A	SNP	Taf3	NM_027748.3	mouse	genbank	58_37k	-1	validated	silent	c.2613	p.P871	0	HMMSmart_SM00249,superfamily_FYVE/PHD zinc finger,PatternScan_ZF_PHD_1,HMMPfam_PHD	HMMSmart_SM00249,HMMPfam_Bromo_TP,HMMSmart_SM00576,superfamily_Histone-fold,superfamily_FYVE/PHD zinc finger,PatternScan_ZF_PHD_1,HMMPfam_PHD	0	no_errors	MOC22	156	0	0	71	68	48.92	146	0	0	198	0	0
2	9842726	9842726	T	A	SNP	Taf3	NM_027748.3	mouse	genbank	58_37k	-1	validated	nonsense	c.2527	p.K843*	0	NULL	HMMSmart_SM00249,HMMPfam_Bromo_TP,HMMSmart_SM00576,superfamily_Histone-fold,superfamily_FYVE/PHD zinc finger,PatternScan_ZF_PHD_1,HMMPfam_PHD	0	no_errors	MOC23	45	0	0	41	0	0	17	22	56.41	67	0	0
2	10050877	10050877	C	G	SNP	Itih2	NM_010582.3	mouse	genbank	58_37k	-1	validated	silent	c.138	p.V46	0	NULL	HMMPfam_VWA,HMMSmart_VWA,HMMSmart_VIT,HMMPfam_ITI_HC_C,HMMPfam_VIT,superfamily_SSF53300	0	no_errors	MOC1	78	84	51.85	150	0	0	119	0	0	153	0	0
2	10127435	10127435	A	T	SNP	Itih5	NM_172471.2	mouse	genbank	58_37k	1	validated	missense	c.690	p.Q230H	0	NULL	HMMPfam_VWA,HMMSmart_VWA,HMMPfam_ITI_HC_C,HMMPfam_VIT,superfamily_SSF53300	0	no_errors	MOC1	94	51	35.17	168	0	0	130	0	0	146	0	0
2	10359747	10359747	T	A	SNP	Sfmbt2	ENSMUST00000070103	mouse	ensembl	58_37k	1	known	missense	c.605	p.L202Q	0	NULL	HMMPfam_MBT,HMMSmart_SM00561,superfamily_Tudor/PWWP/MBT	0	no_errors	MOC22	127	0	0	89	71	44.38	129	0	0	150	0	0
2	10359748	10359748	G	T	SNP	Sfmbt2	ENSMUST00000070103	mouse	ensembl	58_37k	1	known	silent	c.606	p.L202	0	NULL	HMMPfam_MBT,HMMSmart_SM00561,superfamily_Tudor/PWWP/MBT	0	no_errors	MOC22	124	0	0	84	70	45.45	127	0	0	148	0	0
2	10406944	10406944	T	A	SNP	ENSMUSG00000080685	ENSMUST00000117035	mouse	ensembl	58_37k	1	novel	rna	NULL	NULL	0	0	0	0	no_errors	MOC23	34	0	0	63	0	0	19	20	51.28	48	2	4
2	10438752	10438752	A	T	SNP	ENSMUSG00000077954	ENSMUST00000104761	mouse	ensembl	58_37k	1	known	rna	NULL	NULL	0	0	0	0	no_errors	MOC22	11	0	0	11	6	35.29	15	0	0	22	0	0
2	10512163	10512163	T	A	SNP	Sfmbt2	NM_177386.4	mouse	genbank	58_37k	1	provisional	missense	c.2795	p.V932E	0	HMMSmart_SAM,superfamily_SAM_homology,HMMPfam_SAM_2	HMMSmart_SAM,HMMPfam_MBT,HMMSmart_MBT,superfamily_SAM_homology,HMMPfam_SAM_2,superfamily_SSF63748	0	no_errors	MOC22	230	0	0	170	129	43.14	260	1	0.38	400	1	0.25
2	11021389	11021389	T	A	SNP	LOC667192	XR_032260.1	mouse	genbank	58_37k	-1	model	rna	NULL	NULL	0	0	0	0	pseudogene	MOC1	5	14	73.68	31	0	0	20	0	0	28	0	0
2	11021390	11021390	G	T	SNP	LOC667192	XR_032260.1	mouse	genbank	58_37k	-1	model	rna	NULL	NULL	0	0	0	0	pseudogene	MOC1	5	13	72.22	32	0	0	21	0	0	28	0	0
2	11148525	11148525	A	T	SNP	Prkcq	NM_008859.2	mouse	genbank	58_37k	1	provisional	missense	c.31	p.N11Y	0	superfamily_C2 domain (Calcium/lipid-binding domain CaLB)	HMMSmart_SM00133,HMMSmart_SM00219,HMMPfam_C1_1,HMMSmart_SM00109,PatternScan_ZF_DAG_PE_1,HMMSmart_SM00220,PatternScan_PROTEIN_KINASE_ST,superfamily_C2 domain (Calcium/lipid-binding domain CaLB),superfamily_Protein kinase-like (PK-like),PatternScan_PROTEIN_KINASE_ATP,HMMPfam_Pkinase,HMMPfam_Pkinase_C,superfamily_Cysteine-rich domain	0	no_errors	MOC22	127	0	0	47	42	47.19	91	1	1.09	101	0	0
2	11331493	11331493	C	T	SNP	LOC100040898	XM_001475515.1	mouse	genbank	58_37k	-1	model	missense	c.166	p.G56S	0	HMMPfam_Gp_dh_N,superfamily_NAD(P)-binding Rossmann-fold domains	HMMPfam_Gp_dh_N,HMMPfam_Gp_dh_C,PatternScan_GAPDH,superfamily_NAD(P)-binding Rossmann-fold domains,superfamily_Glyceraldehyde-3-phosphate dehydrogenase-like C-terminal domain	0	pseudogene	MOC23	286	0	0	312	0	0	138	123	47.13	344	0	0
2	11685815	11685815	C	A	SNP	Fbxo18	NM_015792.1	mouse	genbank	58_37k	-1	provisional	nonsense	c.793	p.E265*	0	superfamily_F-box domain	HMMPfam_F-box,HMMSmart_SM00256,superfamily_P-loop containing nucleoside triphosphate hydrolases,superfamily_F-box domain	0	no_errors	MOC1	45	73	61.86	91	0	0	96	0	0	84	0	0
2	12004549	12004549	A	G	SNP	LOC667247	XR_032162.1	mouse	genbank	58_37k	-1	model	rna	NULL	NULL	0	0	0	0	pseudogene	MOC23	42	0	0	45	0	0	17	22	56.41	61	0	0
2	12154505	12154505	A	T	SNP	Itga8	NM_001001309.	mouse	genbank	58_37k	-1	validated	missense	c.1030	p.F344I	0	HMMPfam_FG-GAP,HMMSmart_SM00191,superfamily_Integrin alpha N-terminal domain	HMMPfam_Integrin_alpha,HMMPfam_FG-GAP,HMMSmart_SM00191,HMMPfam_Integrin_alpha2,PatternScan_INTEGRIN_ALPHA,superfamily_Integrin domains,superfamily_Integrin alpha N-terminal domain	0	no_errors	MOC23	67	0	0	65	0	0	20	42	67.74	62	0	0
2	12223267	12223267	T	A	SNP	Itga8	NM_001001309.	mouse	genbank	58_37k	-1	validated	missense	c.143	p.Y48F	0	superfamily_Integrin alpha N-terminal domain	HMMPfam_Integrin_alpha,HMMPfam_FG-GAP,HMMSmart_SM00191,HMMPfam_Integrin_alpha2,PatternScan_INTEGRIN_ALPHA,superfamily_Integrin domains,superfamily_Integrin alpha N-terminal domain	0	no_errors	MOC1	24	28	52.83	71	0	0	43	0	0	60	0	0
2	13246942	13246942	G	A	SNP	Cubn	NM_001081084.2	mouse	genbank	58_37k	-1	validated	missense	c.7754	p.P2585L	0	HMMPfam_CUB,HMMSmart_CUB,superfamily_CUB	PatternScan_ASX_HYDROXYL,HMMPfam_CUB,HMMSmart_CUB,superfamily_CUB,PatternScan_AA_TRNA_LIGASE_I,HMMSmart_EGF_CA,HMMPfam_EGF,HMMSmart_EGF,PatternScan_EGF_1,PatternScan_EGF_2,HMMPfam_EGF_CA,PatternScan_EGF_CA,superfamily_SSF57196	0	no_errors	MOC22	134	0	0	55	62	52.99	90	0	0	108	1	0.92
2	13253949	13253949	T	A	SNP	Cubn	NM_001081084.2	mouse	genbank	58_37k	-1	validated	missense	c.7342	p.S2448C	0	HMMSmart_CUB,superfamily_CUB	PatternScan_ASX_HYDROXYL,HMMPfam_CUB,HMMSmart_CUB,superfamily_CUB,PatternScan_AA_TRNA_LIGASE_I,HMMSmart_EGF_CA,HMMPfam_EGF,HMMSmart_EGF,PatternScan_EGF_1,PatternScan_EGF_2,HMMPfam_EGF_CA,PatternScan_EGF_CA,superfamily_SSF57196	0	no_errors	MOC23	208	0	0	183	0	0	64	63	49.22	192	0	0
2	13281941	13281941	G	T	SNP	Cubn	NM_001081084.2	mouse	genbank	58_37k	-1	validated	missense	c.4912	p.P1638T	0	HMMPfam_CUB,HMMSmart_CUB,superfamily_CUB	PatternScan_ASX_HYDROXYL,HMMPfam_CUB,HMMSmart_CUB,superfamily_CUB,PatternScan_AA_TRNA_LIGASE_I,HMMSmart_EGF_CA,HMMPfam_EGF,HMMSmart_EGF,PatternScan_EGF_1,PatternScan_EGF_2,HMMPfam_EGF_CA,PatternScan_EGF_CA,superfamily_SSF57196	0	no_errors	MOC23	198	0	0	145	1	0.68	49	41	45.56	143	0	0
2	13367697	13367697	G	T	SNP	Cubn	NM_001081084.2	mouse	genbank	58_37k	-1	validated	silent	c.2523	p.T841	0	HMMPfam_CUB,HMMSmart_CUB,superfamily_CUB	PatternScan_ASX_HYDROXYL,HMMPfam_CUB,HMMSmart_CUB,superfamily_CUB,PatternScan_AA_TRNA_LIGASE_I,HMMSmart_EGF_CA,HMMPfam_EGF,HMMSmart_EGF,PatternScan_EGF_1,PatternScan_EGF_2,HMMPfam_EGF_CA,PatternScan_EGF_CA,superfamily_SSF57196	0	no_errors	MOC1	57	78	57.78	142	0	0	117	0	0	136	0	0
2	13399734	13399734	T	G	SNP	Cubn	NM_001081084.2	mouse	genbank	58_37k	-1	validated	missense	c.827	p.Q276P	0	HMMSmart_EGF_CA,HMMPfam_EGF_CA,PatternScan_EGF_CA,superfamily_SSF57196	PatternScan_ASX_HYDROXYL,HMMPfam_CUB,HMMSmart_CUB,superfamily_CUB,PatternScan_AA_TRNA_LIGASE_I,HMMSmart_EGF_CA,HMMPfam_EGF,HMMSmart_EGF,PatternScan_EGF_1,PatternScan_EGF_2,HMMPfam_EGF_CA,PatternScan_EGF_CA,superfamily_SSF57196	0	no_errors	MOC1	132	70	34.65	226	0	0	134	0	0	215	0	0
2	13407770	13407770	A	T	SNP	Cubn	NM_001081084.2	mouse	genbank	58_37k	-1	validated	missense	c.488	p.F163Y	0	HMMPfam_EGF,HMMSmart_EGF,PatternScan_EGF_1,superfamily_SSF57196	PatternScan_ASX_HYDROXYL,HMMPfam_CUB,HMMSmart_CUB,superfamily_CUB,PatternScan_AA_TRNA_LIGASE_I,HMMSmart_EGF_CA,HMMPfam_EGF,HMMSmart_EGF,PatternScan_EGF_1,PatternScan_EGF_2,HMMPfam_EGF_CA,PatternScan_EGF_CA,superfamily_SSF57196	0	no_errors	MOC22	118	0	0	61	72	54.14	74	0	0	118	1	0.84
2	13496131	13496131	A	T	SNP	Vim	NM_011701.4	mouse	genbank	58_37k	1	provisional	missense	c.73	p.S25C	0	HMMPfam_Filament_head	HMMPfam_Filament_head,HMMPfam_Filament,PatternScan_IF	0	no_errors	MOC22	116	0	0	58	55	48.67	104	0	0	142	0	0
2	13496352	13496352	C	G	SNP	Vim	NM_011701.4	mouse	genbank	58_37k	1	provisional	missense	c.294	p.N98K	0	HMMPfam_Filament_head	HMMPfam_Filament_head,HMMPfam_Filament,PatternScan_IF	0	no_errors	MOC1	28	14	33.33	48	0	0	22	0	0	32	0	0
2	14063420	14063420	A	T	SNP	Stam	NM_011484.2	mouse	genbank	58_37k	1	provisional	missense	c.1301	p.Q434L	0	NULL	HMMPfam_SH3_1,HMMSmart_SM00326,superfamily_SH3-domain,HMMPfam_VHS,HMMPfam_UIM,superfamily_ENTH/VHS domain,HMMSmart_SM00288	0	no_errors	MOC22	81	0	0	48	37	43.53	63	0	0	81	0	0
2	14063483	14063483	A	C	SNP	Stam	NM_011484.2	mouse	genbank	58_37k	1	provisional	missense	c.1364	p.Q455P	0	NULL	HMMPfam_SH3_1,HMMSmart_SM00326,superfamily_SH3-domain,HMMPfam_VHS,HMMPfam_UIM,superfamily_ENTH/VHS domain,HMMSmart_SM00288	0	no_errors	MOC23	107	0	0	117	0	0	32	33	50.77	80	0	0
2	14140551	14140551	G	T	SNP	Fam23a	NM_001081310.2	mouse	genbank	58_37k	1	predicted	nonsense	c.523	p.E175*	0	NULL	NULL	0	no_errors	MOC1	49	35	41.67	86	0	0	89	0	0	111	0	0
2	14178724	14178724	G	C	SNP	Mrc1	NM_008625.2	mouse	genbank	58_37k	1	validated	missense	c.896	p.R299P	0	HMMPfam_Lectin_C,HMMSmart_CLECT,superfamily_C-type_lectin_fold	HMMPfam_fn2,HMMSmart_FN2,PatternScan_FN2_1,HMMPfam_Ricin_B_lectin,HMMSmart_RICIN,HMMPfam_Lectin_C,HMMSmart_CLECT,superfamily_RicinB_like,superfamily_Kringle-like,superfamily_C-type_lectin_fold,PatternScan_C_TYPE_LECTIN_1	0	no_errors	MOC23	185	0	0	242	2	0.82	70	83	54.25	221	0	0
2	14243534	14243534	A	C	SNP	Mrc1	NM_008625.2	mouse	genbank	58_37k	1	validated	missense	c.3615	p.E1205D	0	HMMPfam_Lectin_C,HMMSmart_CLECT,superfamily_C-type_lectin_fold	HMMPfam_fn2,HMMSmart_FN2,PatternScan_FN2_1,HMMPfam_Ricin_B_lectin,HMMSmart_RICIN,HMMPfam_Lectin_C,HMMSmart_CLECT,superfamily_RicinB_like,superfamily_Kringle-like,superfamily_C-type_lectin_fold,PatternScan_C_TYPE_LECTIN_1	0	no_errors	MOC23	51	0	0	63	0	0	16	21	56.76	50	0	0
2	14310900	14310900	A	T	SNP	Slc39a12	ENSMUST00000114731	mouse	ensembl	58_37k	1	known	missense	c.1	p.M1L	0	NULL	HMMPfam_Zip	0	no_errors	MOC23	193	0	0	209	0	0	80	62	43.66	232	0	0
2	14341730	14341730	A	T	SNP	Slc39a12	NM_001012305.2	mouse	genbank	58_37k	1	validated	missense	c.1144	p.M382L	0	HMMPfam_Zip	HMMPfam_Zip	0	no_errors	MOC1	41	49	54.44	94	0	0	65	0	0	95	0	0
2	14796488	14796488	A	T	SNP	Cacnb2	NM_023116.3	mouse	genbank	58_37k	1	provisional	missense	c.293	p.Q98L	0	superfamily_SH3-domain	HMMPfam_Ca_channel_B,HMMPfam_SH3_1,superfamily_SH3-domain,HMMSmart_SM00072,superfamily_P-loop containing nucleoside triphosphate hydrolases	0	no_errors	MOC1	31	17	35.42	57	0	0	45	0	0	49	0	0
2	14991451	14991451	A	T	SNP	Arl5b	NM_029466.4	mouse	genbank	58_37k	1	provisional	missense	c.115	p.M39L	0	HMMSmart_ARF,HMMPfam_Arf,superfamily_SSF52540	HMMSmart_ARF,PatternScan_ARF,HMMPfam_Arf,superfamily_SSF52540	0	no_errors	MOC1	19	24	55.81	41	0	0	21	0	0	36	0	0
2	18655742	18655742	C	T	SNP	BC061194	NM_001001334.	mouse	genbank	58_37k	1	predicted	silent	c.855	p.L285	0	HMMSmart_ARM,superfamily_ARM-type_fold	HMMPfam_Arm,HMMSmart_ARM,HMMPfam_HEAT,superfamily_ARM-type_fold	0	no_errors	MOC22	94	0	0	58	29	33.33	69	1	1.43	92	1	1.08
2	19397211	19397211	T	A	SNP	4921504E06Rik	NM_027600.4	mouse	genbank	58_37k	-1	predicted	silent	c.1599	p.T533	0	NULL	NULL	0	no_errors	MOC23	333	0	0	333	0	0	159	134	45.73	402	1	0.25
2	19399437	19399437	A	T	SNP	4921504E06Rik	NM_027600.4	mouse	genbank	58_37k	-1	predicted	silent	c.1470	p.T490	0	NULL	NULL	0	no_errors	MOC22	156	0	0	71	54	43.2	121	0	0	150	0	0
2	19888625	19888625	G	C	SNP	LOC100041302	XR_032561.1	mouse	genbank	58_37k	-1	model	rna	NULL	NULL	0	0	0	0	pseudogene	MOC22	59	0	0	40	26	39.39	55	0	0	72	0	0
2	19930278	19930278	A	T	SNP	ENSMUSG00000078203	ENSMUST00000105000	mouse	ensembl	58_37k	1	known	silent	c.318	p.P106	0	NULL	NULL	0	no_errors	MOC23	250	1	0.4	255	0	0	106	85	44.27	264	0	0
2	20635073	20635073	A	C	SNP	Etl4	NM_001081006.1	mouse	genbank	58_37k	1	validated	silent	c.997	p.R333	0	NULL	NULL	0	no_errors	MOC1	41	58	58.59	106	0	0	96	0	0	91	0	0
2	20780546	20780546	C	A	SNP	Arhgap21	NM_001081364.3	mouse	genbank	58_37k	-1	validated	missense	c.3843	p.E1281D	0	HMMPfam_RhoGAP,HMMSmart_SM00324,superfamily_GTPase activation domain GAP	HMMPfam_RhoGAP,HMMSmart_SM00324,HMMPfam_PDZ,HMMSmart_SM00228,superfamily_PDZ domain-like,HMMPfam_PH,HMMSmart_SM00233,superfamily_GTPase activation domain GAP,superfamily_PH domain-like	0	no_errors	MOC22	92	0	0	33	33	50	71	0	0	59	0	0
2	20793372	20793372	C	G	SNP	Arhgap21	NM_001081364.3	mouse	genbank	58_37k	-1	validated	missense	c.2431	p.D811H	0	NULL	HMMPfam_RhoGAP,HMMSmart_SM00324,HMMPfam_PDZ,HMMSmart_SM00228,superfamily_PDZ domain-like,HMMPfam_PH,HMMSmart_SM00233,superfamily_GTPase activation domain GAP,superfamily_PH domain-like	0	no_errors	MOC23	82	0	0	100	0	0	25	39	60.94	96	0	0
2	21134865	21134865	G	A	SNP	Thnsl1	NM_177588.2	mouse	genbank	58_37k	1	validated	missense	c.1802	p.R601Q	0	superfamily_Tryptophan synthase beta subunit-like PLP-dependent enzymes	HMMPfam_SKI,HMMPfam_PALP,superfamily_Tryptophan synthase beta subunit-like PLP-dependent enzymes,superfamily_P-loop containing nucleoside triphosphate hydrolases	0	no_errors	MOC1	2	75	97.4	0	80	100	0	58	100	82	3	3.53
2	21134865	21134865	G	A	SNP	Thnsl1	NM_177588.2	mouse	genbank	58_37k	1	validated	missense	c.1802	p.R601Q	0	superfamily_Tryptophan synthase beta subunit-like PLP-dependent enzymes	HMMPfam_SKI,HMMPfam_PALP,superfamily_Tryptophan synthase beta subunit-like PLP-dependent enzymes,superfamily_P-loop containing nucleoside triphosphate hydrolases	0	no_errors	MOC22	2	75	97.4	0	80	100	0	58	100	82	3	3.53
2	21134865	21134865	G	A	SNP	Thnsl1	NM_177588.2	mouse	genbank	58_37k	1	validated	missense	c.1802	p.R601Q	0	superfamily_Tryptophan synthase beta subunit-like PLP-dependent enzymes	HMMPfam_SKI,HMMPfam_PALP,superfamily_Tryptophan synthase beta subunit-like PLP-dependent enzymes,superfamily_P-loop containing nucleoside triphosphate hydrolases	0	no_errors	MOC23	2	75	97.4	0	80	100	0	58	100	82	3	3.53
2	21135213	21135213	A	T	SNP	Thnsl1	NM_177588.2	mouse	genbank	58_37k	1	validated	missense	c.2150	p.K717M	0	superfamily_Tryptophan synthase beta subunit-like PLP-dependent enzymes	HMMPfam_SKI,HMMPfam_PALP,superfamily_Tryptophan synthase beta subunit-like PLP-dependent enzymes,superfamily_P-loop containing nucleoside triphosphate hydrolases	0	no_errors	MOC23	97	0	0	107	0	0	39	31	44.29	110	0	0
2	21498665	21498665	A	G	SNP	Gpr158	NM_001004761.1	mouse	genbank	58_37k	1	validated	missense	c.1327	p.K443E	0	HMMPfam_7tm_3	HMMPfam_7tm_3	0	no_errors	MOC22	19	0	0	7	11	61.11	18	0	0	21	0	0
2	21748405	21748405	A	G	SNP	Gpr158	NM_001004761.1	mouse	genbank	58_37k	1	validated	silent	c.2688	p.T896	0	NULL	HMMPfam_7tm_3	0	no_errors	MOC22	67	0	0	33	29	46.77	55	0	0	63	0	0
2	22204261	22204261	G	T	SNP	Myo3a	ENSMUST00000044749	mouse	ensembl	58_37k	1	known	missense	c.556	p.V186L	0	HMMSmart_SM00219,HMMSmart_SM00220,superfamily_Protein kinase-like (PK-like),HMMPfam_Pkinase	HMMPfam_IQ,HMMSmart_SM00015,HMMSmart_SM00219,HMMPfam_Myosin_head,HMMSmart_SM00242,HMMSmart_SM00220,superfamily_Protein kinase-like (PK-like),PatternScan_PROTEIN_KINASE_ATP,HMMPfam_Pkinase,superfamily_P-loop containing nucleoside triphosphate hydrolases	0	no_errors	MOC23	169	0	0	166	0	0	67	55	45.08	159	0	0
2	22399906	22399906	A	T	SNP	Myo3a	ENSMUST00000044749	mouse	ensembl	58_37k	1	known	missense	c.2554	p.T852S	0	HMMPfam_Myosin_head,HMMSmart_SM00242,superfamily_P-loop containing nucleoside triphosphate hydrolases	HMMPfam_IQ,HMMSmart_SM00015,HMMSmart_SM00219,HMMPfam_Myosin_head,HMMSmart_SM00242,HMMSmart_SM00220,superfamily_Protein kinase-like (PK-like),PatternScan_PROTEIN_KINASE_ATP,HMMPfam_Pkinase,superfamily_P-loop containing nucleoside triphosphate hydrolases	0	no_errors	MOC23	86	0	0	110	0	0	42	53	55.79	140	0	0
2	22490554	22490554	A	G	SNP	Gad2	NM_008078.2	mouse	genbank	58_37k	1	validated	missense	c.829	p.T277A	0	HMMPfam_Pyridoxal_deC,superfamily_PLP-dependent transferases	HMMPfam_Pyridoxal_deC,PatternScan_DDC_GAD_HDC_YDC,superfamily_PLP-dependent transferases	0	no_errors	MOC22	56	0	0	40	27	40.3	70	0	0	77	0	0
2	22678885	22678885	A	T	SNP	Apbb1ip	NM_019456.2	mouse	genbank	58_37k	1	validated	missense	c.231	p.E77D	0	NULL	HMMPfam_RA,HMMSmart_SM00314,HMMPfam_PH,HMMSmart_SM00233,superfamily_PH domain-like	0	no_errors	MOC23	94	0	0	95	0	0	30	35	53.85	61	0	0
2	22723214	22723214	T	A	SNP	Apbb1ip	NM_019456.2	mouse	genbank	58_37k	1	validated	silent	c.1323	p.S441	0	NULL	HMMPfam_RA,HMMSmart_SM00314,HMMPfam_PH,HMMSmart_SM00233,superfamily_PH domain-like	0	no_errors	MOC22	140	0	0	57	43	43	98	0	0	88	1	1.12
2	23255252	23255252	T	A	SNP	Nxph2	NM_008752.2	mouse	genbank	58_37k	1	provisional	missense	c.95	p.V32E	0	HMMPfam_Neurexophilin	HMMPfam_Neurexophilin	0	no_errors	MOC23	82	0	0	87	0	0	28	27	49.09	66	0	0
2	24014320	24014320	A	T	SNP	Il1f8	NM_027163.4	mouse	genbank	58_37k	1	provisional	silent	c.216	p.I72	0	HMMSmart_SM00125,superfamily_Cytokine	HMMPfam_IL1,HMMSmart_SM00125,PatternScan_INTERLEUKIN_1,superfamily_Cytokine	0	no_errors	MOC23	105	0	0	126	0	0	36	56	60.87	87	0	0
2	24048228	24048228	C	G	SNP	Il1f9	NM_153511.3	mouse	genbank	58_37k	1	validated	missense	c.407	p.A136G	0	HMMPfam_IL1,HMMSmart_SM00125,superfamily_Cytokine	HMMPfam_IL1,HMMSmart_SM00125,superfamily_Cytokine	0	no_errors	MOC22	81	0	0	46	45	49.45	56	0	0	67	0	0
2	24071373	24071373	A	G	SNP	Il1f6	NM_019450.3	mouse	genbank	58_37k	1	provisional	missense	c.7	p.K3E	0	NULL	HMMPfam_IL1,HMMSmart_SM00125,superfamily_Cytokine	0	no_errors	MOC1	134	86	39.09	244	0	0	164	0	0	264	0	0
2	24080046	24080046	T	A	SNP	Il1f6	NM_019450.3	mouse	genbank	58_37k	1	provisional	missense	c.412	p.C138S	0	HMMPfam_IL1,HMMSmart_SM00125,superfamily_Cytokine	HMMPfam_IL1,HMMSmart_SM00125,superfamily_Cytokine	0	no_errors	MOC23	73	0	0	76	0	0	34	20	37.04	72	0	0
2	24146764	24146764	A	G	SNP	Il1f10	NM_153077.2	mouse	genbank	58_37k	1	provisional	silent	c.21	p.A7	0	HMMSmart_SM00125,superfamily_Cytokine	HMMPfam_IL1,HMMSmart_SM00125,superfamily_Cytokine	0	no_errors	MOC23	207	0	0	173	0	0	64	82	56.16	166	0	0
2	24252279	24252279	A	T	SNP	Psd4	NM_177611.3	mouse	genbank	58_37k	1	provisional	missense	c.1127	p.Q376L	0	NULL	HMMPfam_Sec7,HMMSmart_SM00222,superfamily_Sec7 domain,HMMPfam_PH,HMMSmart_SM00233,superfamily_PH domain-like	0	no_errors	MOC23	67	0	0	71	0	0	24	21	46.67	81	0	0
2	24292059	24292059	A	T	SNP	Pax8	NM_011040.3	mouse	genbank	58_37k	-1	provisional	missense	c.810	p.S270R	0	NULL	HMMPfam_PAX,HMMSmart_PAX,PatternScan_PAIRED_1,superfamily_Homeodomain_like	0	no_errors	MOC1	45	33	41.77	121	1	0.82	87	0	0	99	1	1
2	24504037	24504037	A	C	SNP	Cacna1b	NM_001042528.1	mouse	genbank	58_37k	-1	validated	missense	c.4609	p.L1537V	0	HMMPfam_Ion_trans,superfamily_Voltage-gated potassium channels	HMMPfam_Ion_trans,superfamily_Voltage-gated potassium channels	0	no_errors	MOC23	99	0	0	152	0	0	30	41	57.75	107	0	0
2	24514483	24514483	T	C	SNP	Cacna1b	NM_001042528.1	mouse	genbank	58_37k	-1	validated	missense	c.3412	p.M1138V	0	superfamily_Voltage-gated potassium channels	HMMPfam_Ion_trans,superfamily_Voltage-gated potassium channels	0	no_errors	MOC1	102	47	31.54	170	0	0	124	0	0	147	0	0
2	24552800	24552800	A	T	SNP	Cacna1b	NM_001042528.1	mouse	genbank	58_37k	-1	validated	missense	c.1969	p.F657I	0	HMMPfam_Ion_trans,superfamily_Voltage-gated potassium channels	HMMPfam_Ion_trans,superfamily_Voltage-gated potassium channels	0	no_errors	MOC22	55	0	0	18	14	43.75	39	0	0	38	0	0
2	24691925	24691925	C	A	SNP	Ehmt1	NM_001012518.2	mouse	genbank	58_37k	-1	validated	missense	c.2346	p.M782I	0	HMMPfam_Ank,HMMSmart_SM00248,superfamily_Ankyrin repeat	HMMPfam_SET,HMMSmart_SM00317,HMMPfam_Ank,HMMSmart_SM00248,superfamily_Ankyrin repeat,HMMSmart_SM00468,HMMPfam_Pre-SET,superfamily_SET domain	0	no_errors	MOC1	174	101	36.73	293	0	0	284	0	0	328	0	0
2	25086502	25086502	T	G	SNP	Slc34a3	NM_080854.2	mouse	genbank	58_37k	-1	validated	missense	c.1093	p.N365H	0	HMMPfam_Na_Pi_cotrans	HMMPfam_Na_Pi_cotrans	0	no_errors	MOC23	134	0	0	100	0	0	39	61	61	107	0	0
2	25087513	25087513	A	T	SNP	Slc34a3	NM_080854.2	mouse	genbank	58_37k	-1	validated	missense	c.515	p.L172Q	0	HMMPfam_Na_Pi_cotrans	HMMPfam_Na_Pi_cotrans	0	no_errors	MOC22	177	0	0	84	77	47.83	146	0	0	171	0	0
2	25091776	25091776	A	T	SNP	Gm757	NM_001033410.2	mouse	genbank	58_37k	-1	predicted	silent	c.84	p.S28	0	HMMSmart_RING,HMMPfam_zf-C3HC4,superfamily_SSF57850	HMMSmart_RING,PatternScan_ZF_RING_1,HMMPfam_zf-C3HC4,superfamily_SSF57850	0	no_errors	MOC23	195	0	0	198	2	1	66	85	56.29	222	1	0.45
2	25094669	25094669	T	C	SNP	2310002J15Rik	NM_026415.3	mouse	genbank	58_37k	-1	validated	missense	c.350	p.H117R	0	HMMPfam_DUF2477	HMMPfam_DUF2477	0	no_errors	MOC23	39	0	0	49	0	0	30	15	33.33	43	0	0
2	25143727	25143727	A	T	SNP	Tmem210	ENSMUST00000028340	mouse	ensembl	58_37k	1	known	silent	c.33	p.P11	0	NULL	NULL	0	no_errors	MOC23	418	0	0	330	1	0.3	204	118	36.65	406	2	0.49
2	25144511	25144511	T	G	SNP	Tmem210	ENSMUST00000028340	mouse	ensembl	58_37k	1	known	missense	c.290	p.I97R	0	NULL	NULL	0	no_errors	MOC1	35	56	61.54	101	0	0	85	0	0	96	0	0
2	25152133	25152133	G	C	SNP	Grin1	NM_008169.2	mouse	genbank	58_37k	-1	validated	silent	c.2268	p.S756	0	HMMPfam_Lig_chan,HMMSmart_SM00079,superfamily_Periplasmic binding protein-like II	HMMPfam_Lig_chan,HMMSmart_SM00079,HMMPfam_ANF_receptor,HMMPfam_CaM_bdg_C0,HMMPfam_Lig_chan-Glu_bd,superfamily_Periplasmic binding protein-like I,superfamily_Periplasmic binding protein-like II,superfamily_Voltage-gated potassium channels	0	no_errors	MOC1	57	43	43	78	0	0	61	1	1.61	98	0	0
2	25219441	25219441	T	A	SNP	Uap1l1	NM_001033293.2	mouse	genbank	58_37k	-1	provisional	missense	c.922	p.S308C	0	HMMPfam_UDPGP,superfamily_Nucleotide-diphospho-sugar transferases	HMMPfam_UDPGP,superfamily_Nucleotide-diphospho-sugar transferases	0	no_errors	MOC1	62	88	58.67	151	0	0	141	0	0	170	0	0
2	25263417	25263417	A	T	SNP	Npdc1	NM_008721.3	mouse	genbank	58_37k	1	provisional	missense	c.457	p.T153S	0	HMMPfam_NPDC1	HMMPfam_NPDC1	0	no_errors	MOC23	249	0	0	175	0	0	101	68	40	194	2	1.02
2	25281168	25281168	G	T	SNP	Fut7	NM_013524.3	mouse	genbank	58_37k	1	validated	missense	c.776	p.R259L	0	HMMPfam_Glyco_transf_10	HMMPfam_Glyco_transf_10	0	no_errors	MOC23	222	0	0	231	0	0	103	89	46.35	218	0	0
2	25291140	25291140	G	T	SNP	Abca2	NM_007379.2	mouse	genbank	58_37k	1	validated	missense	c.1384	p.A462S	0	NULL	PatternScan_LIPOCALIN,HMMPfam_ABC_tran,HMMSmart_AAA,PatternScan_EGF_1,PatternScan_ABC_TRANSPORTER_1,superfamily_SSF52540	0	no_errors	MOC23	227	0	0	216	0	0	113	77	40.53	277	1	0.36
2	25354430	25354430	A	T	SNP	C8g	NM_027062.1	mouse	genbank	58_37k	-1	provisional	missense	c.590	p.L197Q	0	superfamily_Lipocalins	HMMPfam_Lipocalin,PatternScan_LIPOCALIN,superfamily_Lipocalins	0	no_errors	MOC23	264	0	0	235	0	0	130	99	43.23	236	0	0
2	25435272	25435272	T	A	SNP	Gm996	NM_001005424.2	mouse	genbank	58_37k	-1	validated	missense	c.146	p.H49L	0	NULL	NULL	0	no_errors	MOC23	170	0	0	161	0	0	60	76	54.68	185	0	0
2	25472572	25472572	T	A	SNP	4921530D09Rik	ENSMUST00000028309	mouse	ensembl	58_37k	-1	known	missense	c.126	p.K42N	0	NULL	NULL	0	no_errors	MOC22	110	0	0	55	50	47.62	95	0	0	110	0	0
2	25701222	25701222	C	T	SNP	Sohlh1	NM_001001714.	mouse	genbank	58_37k	-1	provisional	missense	c.424	p.A142T	0	NULL	HMMPfam_HLH,superfamily_HLH helix-loop-helix DNA-binding domain	0	no_errors	MOC1	61	49	44.55	112	0	0	83	0	0	82	0	0
2	25744320	25744320	A	T	SNP	Kcnt1	NM_175462.3	mouse	genbank	58_37k	1	provisional	missense	c.319	p.T107S	0	NULL	HMMPfam_BK_channel_a,HMMPfam_Ion_trans_2,superfamily_NAD(P)-bd,superfamily_SSF81324	0	no_errors	MOC23	215	0	0	212	0	0	69	86	55.48	214	2	0.92
2	25757270	25757270	A	T	SNP	Kcnt1	NM_175462.3	mouse	genbank	58_37k	1	provisional	splice_site	c.1713-2	e18-2	0	0	0	0	no_errors	MOC22	164	0	0	101	81	44.51	153	0	0	206	0	0
2	25757385	25757385	C	G	SNP	Kcnt1	NM_175462.3	mouse	genbank	58_37k	1	provisional	missense	c.1826	p.T609S	0	NULL	HMMPfam_BK_channel_a,HMMPfam_Ion_trans_2,superfamily_NAD(P)-bd,superfamily_SSF81324	0	no_errors	MOC23	128	0	0	124	0	0	73	52	41.6	125	1	0.79
2	25792105	25792105	T	A	SNP	Camsap1	ENSMUST00000091268	mouse	ensembl	58_37k	-1	known	nonsense	c.3832	p.K1278*	0	NULL	superfamily_PRC-barrel domain,HMMPfam_DUF1781,superfamily_Calponin-homology domain CH-domain	0	no_errors	MOC1	62	72	53.73	146	0	0	105	0	0	134	0	0
2	25794613	25794613	T	A	SNP	Camsap1	ENSMUST00000091268	mouse	ensembl	58_37k	-1	known	missense	c.2618	p.E873V	0	NULL	superfamily_PRC-barrel domain,HMMPfam_DUF1781,superfamily_Calponin-homology domain CH-domain	0	no_errors	MOC1	22	12	35.29	49	0	0	50	0	0	54	0	0
2	25915889	25915889	T	A	SNP	Nacc2	NM_001037098.1	mouse	genbank	58_37k	-1	validated	nonsense	c.1354	p.K452*	0	NULL	HMMSmart_SM00225,superfamily_POZ domain,HMMPfam_BTB,HMMPfam_BEN	0	no_errors	MOC23	195	0	0	215	0	0	87	91	50.84	258	0	0
2	26136286	26136286	T	A	SNP	4932418E24Rik	NM_177841.3	mouse	genbank	58_37k	-1	predicted	nonsense	c.1699	p.K567*	0	NULL	NULL	0	no_errors	MOC1	61	101	62.35	114	0	0	101	0	0	107	0	0
2	26175446	26175446	A	T	SNP	Gpsm1	ENSMUST00000066889	mouse	ensembl	58_37k	1	known	nonsense	c.64	p.K22*	0	NULL	HMMPfam_TPR_1,HMMPfam_GoLoco,HMMSmart_GoLoco,HMMPfam_TPR_2,HMMSmart_TPR,superfamily_SSF48452	0	no_errors	MOC22	226	1	0.44	106	97	47.78	166	1	0.6	246	3	1.2
2	26213104	26213104	G	T	SNP	Card9	ENSMUST00000028294	mouse	ensembl	58_37k	-1	known	missense	c.688	p.H230N	0	NULL	HMMPfam_CARD,superfamily_DEATH_like	0	no_errors	MOC22	189	0	0	69	62	47.33	129	0	0	164	1	0.61
2	26275151	26275151	T	C	SNP	Sec16a	NM_153125.2	mouse	genbank	58_37k	-1	validated	missense	c.6362	p.E2121G	0	NULL	NULL	0	no_errors	MOC22	161	0	0	81	52	39.1	119	0	0	130	0	0
2	26325854	26325854	C	T	SNP	Notch1	NM_008714.3	mouse	genbank	58_37k	-1	validated	missense	c.3583	p.G1195R	0	HMMSmart_EGF_CA,HMMPfam_EGF,PatternScan_EGF_CA,superfamily_SSF57196	PatternScan_ASX_HYDROXYL,HMMPfam_Notch,HMMSmart_NL,superfamily_Notch_region,HMMSmart_EGF_CA,HMMPfam_Ank,HMMSmart_ANK,superfamily_ANK,HMMPfam_EGF,HMMSmart_EGF,HMMPfam_NOD,HMMPfam_NODP,PatternScan_EGF_1,PatternScan_EGF_2,HMMPfam_EGF_CA,PatternScan_EGF_CA,superfamily_SSF57196	0	no_errors	MOC23	252	0	0	203	0	0	78	84	51.85	196	2	1.01
2	26325928	26325928	T	A	SNP	Notch1	NM_008714.3	mouse	genbank	58_37k	-1	validated	splice_site	c.3511-2	e22-2	0	0	0	0	no_errors	MOC23	121	0	0	116	1	0.85	44	63	58.88	117	1	0.85
2	26335900	26335900	C	A	SNP	Notch1	NM_008714.3	mouse	genbank	58_37k	-1	validated	splice_site	c.1100-1	e7-1	0	0	0	0	no_errors	MOC1	71	33	31.43	104	0	0	90	0	0	134	1	0.74
2	26748196	26748196	T	A	SNP	Surf6	NM_009298.3	mouse	genbank	58_37k	-1	provisional	missense	c.638	p.E213V	0	HMMPfam_SURF6	HMMPfam_SURF6	0	no_errors	MOC1	142	231	61.44	465	0	0	403	0	0	483	0	0
2	26758272	26758272	C	A	SNP	Surf6	NM_009298.3	mouse	genbank	58_37k	-1	provisional	missense	c.36	p.Q12H	0	NULL	HMMPfam_SURF6	0	no_errors	MOC23	166	0	0	162	1	0.61	67	52	43.7	147	0	0
2	26829473	26829473	A	T	SNP	Adamts13	NM_001001322.	mouse	genbank	58_37k	1	validated	nonsense	c.142	p.K48*	0	NULL	HMMPfam_CUB,superfamily_Spermadhesin CUB domain,HMMPfam_TSP_1,HMMSmart_SM00209,superfamily_TSP-1 type 1 repeat,HMMPfam_Peptidase_M10,HMMSmart_SM00608,superfamily_Metalloproteases (zincins) catalytic domain	0	no_errors	MOC22	197	0	0	119	108	47.58	237	0	0	254	1	0.39
2	27021360	27021360	A	T	SNP	Dbh	NM_138942.3	mouse	genbank	58_37k	1	validated	missense	c.325	p.T109S	0	HMMSmart_DoH,HMMPfam_DOMON	HMMPfam_Cu2_monooxygen,PatternScan_CU2_MONOOXYGENASE_1,HMMSmart_DoH,superfamily_PHM_PNGase_F,HMMPfam_DOMON,HMMPfam_Cu2_monoox_C,PatternScan_CU2_MONOOXYGENASE_2	0	no_errors	MOC1	69	44	38.94	129	0	0	84	0	0	127	0	0
2	27025898	27025898	A	T	SNP	Dbh	NM_138942.3	mouse	genbank	58_37k	1	validated	missense	c.565	p.T189S	0	HMMSmart_DoH	HMMPfam_Cu2_monooxygen,PatternScan_CU2_MONOOXYGENASE_1,HMMSmart_DoH,superfamily_PHM_PNGase_F,HMMPfam_DOMON,HMMPfam_Cu2_monoox_C,PatternScan_CU2_MONOOXYGENASE_2	0	no_errors	MOC22	150	0	0	54	59	51.75	130	1	0.75	157	1	0.63
2	27030468	27030468	G	T	SNP	Dbh	NM_138942.3	mouse	genbank	58_37k	1	validated	missense	c.1170	p.L390F	0	superfamily_PHM_PNGase_F,HMMPfam_Cu2_monoox_C	HMMPfam_Cu2_monooxygen,PatternScan_CU2_MONOOXYGENASE_1,HMMSmart_DoH,superfamily_PHM_PNGase_F,HMMPfam_DOMON,HMMPfam_Cu2_monoox_C,PatternScan_CU2_MONOOXYGENASE_2	0	no_errors	MOC23	164	0	0	154	0	0	81	47	36.72	192	1	0.52
2	27086365	27086365	G	T	SNP	Sardh	NM_138665.1	mouse	genbank	58_37k	-1	provisional	missense	c.1166	p.P389H	0	HMMPfam_DAO,superfamily_FAD/NAD(P)-binding domain	HMMPfam_DAO,HMMPfam_GCV_T,HMMPfam_GCV_T_C,superfamily_Aminomethyltransferase beta-barrel domain,superfamily_Aminomethyltransferase folate-binding domain,superfamily_FAD/NAD(P)-binding domain,superfamily_FAD-linked reductases C-terminal domain	0	no_errors	MOC22	228	0	0	121	118	49.17	176	0	0	252	1	0.4
2	27099900	27099900	A	T	SNP	Sardh	NM_138665.1	mouse	genbank	58_37k	-1	provisional	silent	c.123	p.P41	0	NULL	HMMPfam_DAO,HMMPfam_GCV_T,HMMPfam_GCV_T_C,superfamily_Aminomethyltransferase beta-barrel domain,superfamily_Aminomethyltransferase folate-binding domain,superfamily_FAD/NAD(P)-binding domain,superfamily_FAD-linked reductases C-terminal domain	0	no_errors	MOC22	246	0	0	102	103	50.24	187	0	0	265	0	0
2	27137912	27137912	T	A	SNP	Vav2	NM_009500.1	mouse	genbank	58_37k	-1	provisional	splice_site	c.1503-2	e16-2	0	0	0	0	no_errors	MOC1	98	85	46.2	163	0	0	133	0	0	197	0	0
2	27151677	27151677	T	A	SNP	Vav2	NM_009500.1	mouse	genbank	58_37k	-1	provisional	missense	c.787	p.T263S	0	HMMPfam_RhoGEF,HMMSmart_RhoGEF,superfamily_DH-domain	HMMPfam_RhoGEF,HMMSmart_RhoGEF,superfamily_DH-domain,HMMPfam_SH2,HMMSmart_SH2,PatternScan_DH_1,HMMPfam_SH3_1,HMMSmart_SH3,superfamily_SH3,HMMPfam_CH,HMMSmart_CH,HMMPfam_PH,HMMSmart_PH,HMMPfam_C1_1,HMMSmart_C1,PatternScan_ZF_DAG_PE_1,HMMPfam_SH3_2,superfamily_Calponin-homology,superfamily_SSF50729,superfamily_SSF55550,superfamily_SSF57889	0	no_errors	MOC22	213	0	0	107	95	47.03	164	2	1.2	230	4	1.71
2	27192239	27192239	C	T	SNP	Vav2	NM_009500.1	mouse	genbank	58_37k	-1	provisional	missense	c.341	p.R114H	0	HMMPfam_CH,HMMSmart_CH,superfamily_Calponin-homology	HMMPfam_RhoGEF,HMMSmart_RhoGEF,superfamily_DH-domain,HMMPfam_SH2,HMMSmart_SH2,PatternScan_DH_1,HMMPfam_SH3_1,HMMSmart_SH3,superfamily_SH3,HMMPfam_CH,HMMSmart_CH,HMMPfam_PH,HMMSmart_PH,HMMPfam_C1_1,HMMSmart_C1,PatternScan_ZF_DAG_PE_1,HMMPfam_SH3_2,superfamily_Calponin-homology,superfamily_SSF50729,superfamily_SSF55550,superfamily_SSF57889	0	no_errors	MOC1	53	79	59.85	121	0	0	106	0	0	142	0	0
2	27597349	27597349	G	T	SNP	Rxra	NM_011305.3	mouse	genbank	58_37k	1	validated	missense	c.511	p.D171Y	0	HMMPfam_zf-C4,HMMSmart_SM00399,superfamily_Glucocorticoid receptor-like (DNA-binding domain)	HMMPfam_Hormone_recep,HMMSmart_SM00430,HMMPfam_zf-C4,HMMSmart_SM00399,PatternScan_NUCLEAR_REC_DBD_1,superfamily_Nuclear receptor ligand-binding domain,superfamily_Glucocorticoid receptor-like (DNA-binding domain)	0	no_errors	MOC1	98	85	46.45	219	0	0	158	0	0	215	0	0
2	27829411	27829411	G	C	SNP	Col5a1	NM_015734.2	mouse	genbank	58_37k	1	validated	missense	c.2112	p.Q704H	0	HMMPfam_Collagen	HMMPfam_COLFI,HMMSmart_SM00038,HMMSmart_SM00210,HMMPfam_Collagen,superfamily_Concanavalin A-like lectins/glucanases,HMMPfam_Laminin_G_2	0	no_errors	MOC1	97	68	40.96	184	1	0.54	146	1	0.68	147	0	0
2	27852395	27852395	T	A	SNP	Col5a1	NM_015734.2	mouse	genbank	58_37k	1	validated	missense	c.2806	p.S936T	0	HMMPfam_Collagen	HMMPfam_COLFI,HMMSmart_SM00038,HMMSmart_SM00210,HMMPfam_Collagen,superfamily_Concanavalin A-like lectins/glucanases,HMMPfam_Laminin_G_2	0	no_errors	MOC1	78	34	30.36	87	0	0	72	0	0	99	0	0
2	28323876	28323876	G	A	SNP	Mrps2	NM_080452.3	mouse	genbank	58_37k	1	validated	missense	c.157	p.D53N	0	NULL	HMMPfam_Ribosomal_S2,superfamily_Ribosomal protein S2,PatternScan_RIBOSOMAL_S2_1	0	no_errors	MOC22	245	0	0	119	114	48.93	189	5	2.58	264	1	0.38
2	28332763	28332763	T	C	SNP	LOC665412	XR_032795.1	mouse	genbank	58_37k	1	model	rna	NULL	NULL	0	0	0	0	pseudogene	MOC23	112	0	0	135	0	0	35	49	58.33	104	0	0
2	28332939	28332939	A	T	SNP	LOC665412	XR_032795.1	mouse	genbank	58_37k	1	model	rna	NULL	NULL	0	0	0	0	pseudogene	MOC22	50	0	0	35	33	48.53	60	0	0	65	0	0
2	28333510	28333510	T	G	SNP	LOC665412	XR_032795.1	mouse	genbank	58_37k	1	model	rna	NULL	NULL	0	0	0	0	pseudogene	MOC23	21	0	0	24	0	0	17	8	32	18	0	0
2	28361749	28361749	A	T	SNP	ENSMUSG00000063611	ENSMUST00000074761	mouse	ensembl	58_37k	1	known	missense	c.135	p.L45F	0	NULL	NULL	0	no_errors	MOC22	21	0	0	11	11	50	12	0	0	28	0	0
2	28589915	28589915	C	A	SNP	1190002A17Rik	NM_001033874.2	mouse	genbank	58_37k	1	validated	missense	c.506	p.T169N	0	superfamily_SSF52540	HMMPfam_ADK,PatternScan_ADENYLATE_KINASE,superfamily_Adenylate_kinase_Znf_lid,superfamily_SSF52540	0	no_errors	MOC22	97	0	0	53	38	41.76	104	0	0	99	0	0
2	28689413	28689413	C	A	SNP	Gtf3c4	NM_172977.3	mouse	genbank	58_37k	-1	validated	missense	c.1826	p.G609V	0	NULL	NULL	0	no_errors	MOC22	163	1	0.61	72	76	51.01	140	0	0	119	0	0
2	28715426	28715426	A	T	SNP	Ddx31	NM_001033294.3	mouse	genbank	58_37k	1	validated	silent	c.939	p.P313	0	HMMSmart_DEXDc,superfamily_SSF52540	PatternScan_DEAD_ATP_HELICASE,HMMPfam_Helicase_C,HMMSmart_HELICc,HMMPfam_DEAD,HMMSmart_DEXDc,superfamily_SSF52540	0	no_errors	MOC22	74	0	0	36	43	54.43	85	0	0	108	1	0.92
2	28715551	28715551	A	T	SNP	Ddx31	NM_001033294.3	mouse	genbank	58_37k	1	validated	missense	c.1064	p.K355M	0	superfamily_SSF52540	PatternScan_DEAD_ATP_HELICASE,HMMPfam_Helicase_C,HMMSmart_HELICc,HMMPfam_DEAD,HMMSmart_DEXDc,superfamily_SSF52540	0	no_errors	MOC22	143	0	0	81	64	44.14	137	1	0.72	177	0	0
2	28716300	28716300	G	A	SNP	Ddx31	NM_001033294.3	mouse	genbank	58_37k	1	validated	missense	c.1175	p.S392N	0	superfamily_SSF52540	PatternScan_DEAD_ATP_HELICASE,HMMPfam_Helicase_C,HMMSmart_HELICc,HMMPfam_DEAD,HMMSmart_DEXDc,superfamily_SSF52540	0	no_errors	MOC23	209	0	0	163	2	1.21	52	66	55.93	146	0	0
2	28920441	28920441	A	T	SNP	Ttf1	NM_009442.2	mouse	genbank	58_37k	1	validated	missense	c.296	p.K99M	0	NULL	HMMSmart_SM00717,superfamily_Homeodomain-like,HMMPfam_Myb_DNA-binding	0	no_errors	MOC22	95	0	0	44	35	44.3	66	0	0	75	0	0
2	28920896	28920896	G	T	SNP	Ttf1	NM_009442.2	mouse	genbank	58_37k	1	validated	missense	c.751	p.G251C	0	NULL	HMMSmart_SM00717,superfamily_Homeodomain-like,HMMPfam_Myb_DNA-binding	0	no_errors	MOC1	76	52	40.62	118	0	0	94	0	0	116	1	0.85
2	28921389	28921389	A	T	SNP	Ttf1	NM_009442.2	mouse	genbank	58_37k	1	validated	missense	c.1244	p.Q415L	0	NULL	HMMSmart_SM00717,superfamily_Homeodomain-like,HMMPfam_Myb_DNA-binding	0	no_errors	MOC23	138	0	0	92	0	0	44	48	52.17	119	0	0
2	29083583	29083583	G	A	SNP	Ntng2	NM_133501.1	mouse	genbank	58_37k	-1	provisional	silent	c.372	p.T124	0	HMMPfam_Laminin_N,HMMSmart_LamNT	HMMPfam_Laminin_EGF,HMMSmart_EGF_Lam,PatternScan_EGF_LAM_1,HMMPfam_EGF,HMMSmart_EGF,HMMPfam_Laminin_N,HMMSmart_LamNT,PatternScan_EGF_1,PatternScan_EGF_2,superfamily_SSF57196	0	no_errors	MOC22	121	0	0	57	61	51.26	102	1	0.97	164	0	0
2	29556301	29556301	A	T	SNP	Rapgef1	NM_001039087.1	mouse	genbank	58_37k	1	validated	silent	c.1125	p.S375	0	NULL	HMMPfam_RasGEF_N,HMMSmart_RasGEFN,HMMPfam_RasGEF,HMMSmart_RasGEF,superfamily_Ras_GEF,PatternScan_RASGEF	0	no_errors	MOC22	201	0	0	96	74	43.53	134	0	0	168	0	0
2	29562827	29562827	G	T	SNP	Rapgef1	ENSMUST00000147488	mouse	ensembl	58_37k	1	known	nonsense	c.307	p.G103*	0	NULL	HMMPfam_RasGEF_N,HMMSmart_SM00229,HMMPfam_RasGEF,HMMSmart_SM00147,superfamily_Ras GEF,PatternScan_RASGEF	0	pseudogene:no_stop_codon:bad_bp_length_for_coding_region	MOC22	138	0	0	59	56	48.7	131	0	0	166	0	0
2	29863404	29863404	A	T	SNP	Spna2	NM_001076554.2	mouse	genbank	58_37k	1	validated	missense	c.3701	p.Q1234L	0	HMMPfam_Spectrin,HMMSmart_SM00150,superfamily_Spectrin repeat	HMMPfam_SH3_1,HMMSmart_SM00326,superfamily_SH3-domain,HMMPfam_Spectrin,HMMSmart_SM00054,HMMPfam_efhand_Ca_insen,HMMSmart_SM00150,PatternScan_EF_HAND_1,HMMPfam_efhand,superfamily_Spectrin repeat,superfamily_EF-hand	0	no_errors	MOC22	84	0	0	39	52	56.52	72	0	0	72	0	0
2	29866312	29866312	A	T	SNP	Spna2	NM_001076554.2	mouse	genbank	58_37k	1	validated	silent	c.4080	p.R1360	0	HMMPfam_Spectrin,HMMSmart_SM00150,superfamily_Spectrin repeat	HMMPfam_SH3_1,HMMSmart_SM00326,superfamily_SH3-domain,HMMPfam_Spectrin,HMMSmart_SM00054,HMMPfam_efhand_Ca_insen,HMMSmart_SM00150,PatternScan_EF_HAND_1,HMMPfam_efhand,superfamily_Spectrin repeat,superfamily_EF-hand	0	no_errors	MOC22	120	0	0	46	51	52.58	81	0	0	93	0	0
2	29925096	29925096	A	T	SNP	Set	NM_023871.3	mouse	genbank	58_37k	1	provisional	missense	c.473	p.N158I	0	HMMPfam_NAP	HMMPfam_NAP	0	no_errors	MOC22	69	0	0	53	41	43.62	59	0	0	59	0	0
2	30111506	30111506	A	T	SNP	Lrrc8a	NM_177725.4	mouse	genbank	58_37k	1	validated	nonsense	c.811	p.K271*	0	NULL	HMMPfam_LRR_1,HMMSmart_SM00369,HMMSmart_SM00365,superfamily_L domain-like	0	no_errors	MOC22	136	0	0	72	84	53.85	123	0	0	136	0	0
2	30164809	30164809	A	C	SNP	Nup188	NM_198304.2	mouse	genbank	58_37k	1	provisional	silent	c.868	p.R290	0	HMMPfam_Nup188	HMMPfam_Nup188	0	no_errors	MOC23	153	0	0	132	0	0	67	34	33.66	139	0	0
2	30172744	30172744	A	C	SNP	Nup188	NM_198304.2	mouse	genbank	58_37k	1	provisional	missense	c.1433	p.H478P	0	HMMPfam_Nup188	HMMPfam_Nup188	0	no_errors	MOC23	177	0	0	177	0	0	63	74	54.01	182	0	0
2	30233561	30233561	G	T	SNP	Fam73b	NM_175392.3	mouse	genbank	58_37k	1	predicted	nonsense	c.1081	p.E361*	0	HMMPfam_DUF2217	HMMPfam_DUF2217	0	no_errors	MOC1	102	52	33.55	132	0	0	104	0	0	142	0	0
2	30570165	30570165	T	A	SNP	ENSMUSG00000075416	ENSMUST00000100212	mouse	ensembl	58_37k	-1	known	missense	c.340	p.R114W	0	NULL	NULL	0	no_errors	MOC1	18	22	55	40	0	0	48	0	0	38	0	0
2	30653435	30653435	T	A	SNP	1700001O22Rik	NM_198000.2	mouse	genbank	58_37k	-1	validated	missense	c.665	p.E222V	0	NULL	NULL	0	no_errors	MOC22	66	0	0	28	30	51.72	53	0	0	57	0	0
2	30811321	30811321	A	T	SNP	Tor1b	ENSMUST00000135507	mouse	ensembl	58_37k	1	known	missense	c.499	p.R167W	0	NULL	HMMPfam_Torsin,superfamily_P-loop containing nucleoside triphosphate hydrolases	0	no_errors	MOC1	39	40	50.63	83	0	0	56	0	0	97	0	0
2	31253277	31253277	T	A	SNP	Hmcn2	ENSMUST00000113532	mouse	ensembl	58_37k	1	known	missense	c.6649	p.S2217T	0	HMMSmart_IGc2,HMMPfam_I-set,superfamily_SSF48726	PatternScan_ASX_HYDROXYL,PatternScan_ARGE_DAPE_CPG2_1,HMMSmart_EGF_CA,HMMSmart_VWA,HMMSmart_IGc2,HMMSmart_IG,HMMPfam_EGF,HMMPfam_G2F,superfamily_GFP_like,PatternScan_EGF_2,HMMPfam_EGF_CA,HMMPfam_I-set,HMMPfam_ig,PatternScan_EGF_CA,superfamily_SSF48726,superfamily_SSF53300,superfamily_SSF57196	0	no_errors	MOC22	229	0	0	107	83	43.68	184	0	0	226	1	0.44
2	31280913	31280913	T	A	SNP	Hmcn2	ENSMUST00000113532	mouse	ensembl	58_37k	1	known	missense	c.11153	p.V3718D	0	HMMPfam_I-set,superfamily_SSF48726	PatternScan_ASX_HYDROXYL,PatternScan_ARGE_DAPE_CPG2_1,HMMSmart_EGF_CA,HMMSmart_VWA,HMMSmart_IGc2,HMMSmart_IG,HMMPfam_EGF,HMMPfam_G2F,superfamily_GFP_like,PatternScan_EGF_2,HMMPfam_EGF_CA,HMMPfam_I-set,HMMPfam_ig,PatternScan_EGF_CA,superfamily_SSF48726,superfamily_SSF53300,superfamily_SSF57196	0	no_errors	MOC23	213	0	0	171	0	0	73	84	53.5	248	0	0
2	31450818	31450818	G	T	SNP	Fubp3	NM_001033389.3	mouse	genbank	58_37k	1	validated	missense	c.323	p.G108V	0	HMMSmart_KH,HMMPfam_KH_1,superfamily_SSF54791	HMMSmart_KH,HMMPfam_KH_1,superfamily_SSF54791	0	no_errors	MOC23	131	0	0	110	1	0.9	52	42	44.68	116	0	0
2	31656593	31656593	A	G	SNP	Abl1	NM_009594.3	mouse	genbank	58_37k	1	validated	missense	c.2546	p.E849G	0	NULL	HMMPfam_SH2,HMMSmart_SM00252,HMMPfam_Pkinase_Tyr,HMMSmart_SM00219,HMMPfam_SH3_1,HMMSmart_SM00326,superfamily_SH3-domain,HMMSmart_SM00220,PatternScan_PROTEIN_KINASE_TYR,superfamily_Protein kinase-like (PK-like),HMMPfam_F_actin_bind,HMMSmart_SM00808,PatternScan_PROTEIN_KINASE_ATP,superfamily_SH2 domain	0	no_errors	MOC23	54	0	0	52	0	0	29	18	38.3	59	0	0
2	31694244	31694244	C	A	SNP	Fibcd1	ENSMUST00000028188	mouse	ensembl	58_37k	-1	known	silent	c.120	p.A40	0	NULL	HMMPfam_Fibrinogen_C,HMMSmart_SM00186,PatternScan_FIBRIN_AG_C_DOMAIN,superfamily_Fibrinogen C-terminal domain-like	0	no_errors	MOC1	33	14	29.79	42	0	0	34	0	0	47	0	0
2	31806097	31806097	A	T	SNP	Aif1l	NM_145144.1	mouse	genbank	58_37k	1	provisional	missense	c.80	p.E27V	0	NULL	superfamily_EF-hand	0	no_errors	MOC23	99	0	0	111	0	0	51	26	33.77	120	0	0
2	31889825	31889825	G	T	SNP	Nup214	NM_172268.2	mouse	genbank	58_37k	1	validated	silent	c.4845	p.S1615	0	NULL	HMMSmart_WD40,superfamily_WD40_like	0	no_errors	MOC22	127	0	0	58	62	51.24	100	0	0	119	1	0.83
2	31924961	31924961	A	T	SNP	Fam78a	NM_175511.4	mouse	genbank	58_37k	-1	predicted	missense	c.656	p.V219E	0	NULL	NULL	0	no_errors	MOC23	217	0	0	223	2	0.88	106	77	42.08	263	0	0
2	32069771	32069771	A	G	SNP	Bat2l	ENSMUST00000069817	mouse	ensembl	58_37k	1	known	missense	c.1763	p.Q588R	0	NULL	NULL	0	no_errors	MOC22	140	1	0.71	49	67	57.76	102	1	0.96	111	0	0
2	32104157	32104157	A	T	SNP	Pomt1	NM_145145.1	mouse	genbank	58_37k	1	provisional	missense	c.1264	p.S422C	0	HMMPfam_MIR,superfamily_MIR domain (Pfam 02815),HMMSmart_SM00472	HMMPfam_PMT,HMMPfam_MIR,superfamily_MIR domain (Pfam 02815),HMMSmart_SM00472	0	no_errors	MOC23	116	0	0	100	0	0	27	42	60.87	96	0	0
2	32111567	32111567	T	A	SNP	Uck1	NM_011675.2	mouse	genbank	58_37k	-1	validated	missense	c.817	p.S273C	0	NULL	HMMPfam_PRK,superfamily_SSF52540	0	no_errors	MOC1	18	12	40	31	0	0	19	0	0	31	0	0
2	32158241	32158241	G	T	SNP	Golga2	NM_133852.2	mouse	genbank	58_37k	1	validated	missense	c.1153	p.A385S	0	NULL	superfamily_Prefoldin	0	no_errors	MOC23	261	0	0	259	1	0.38	133	108	44.81	313	0	0
2	32225784	32225784	A	T	SNP	Ciz1	ENSMUST00000151806	mouse	ensembl	58_37k	1	known	nonsense	c.178	p.R60*	0	NULL	NULL	0	pseudogene:no_stop_codon	MOC22	233	0	0	91	91	49.73	156	1	0.64	189	0	0
2	32226467	32226467	A	C	SNP	Ciz1	NM_028412.1	mouse	genbank	58_37k	1	provisional	missense	c.869	p.Q290P	0	NULL	HMMSmart_ZnF_U1,PatternScan_ZINC_FINGER_C2H2_1,HMMSmart_ZnF_C2H2	0	no_errors	MOC23	70	0	0	81	0	0	30	23	43.4	75	0	0
2	32227822	32227822	G	T	SNP	Ciz1	NM_028412.1	mouse	genbank	58_37k	1	provisional	missense	c.1457	p.W486L	0	NULL	HMMSmart_ZnF_U1,PatternScan_ZINC_FINGER_C2H2_1,HMMSmart_ZnF_C2H2	0	no_errors	MOC22	156	0	0	95	77	44.77	127	0	0	155	0	0
2	32271668	32271668	T	A	SNP	Slc25a25	NM_146118.3	mouse	genbank	58_37k	-1	validated	missense	c.1535	p.Q512L	0	HMMPfam_Mito_carr	superfamily_Mitoch_carrier,HMMSmart_EFh,HMMPfam_Mito_carr,HMMPfam_efhand,superfamily_SSF47473	0	no_errors	MOC22	92	0	0	41	28	40.58	70	1	1.41	77	1	1.28
2	32271844	32271844	T	A	SNP	Slc25a25	NM_146118.3	mouse	genbank	58_37k	-1	validated	splice_site	c.1361-2	e11-2	0	0	0	0	no_errors	MOC23	129	0	0	121	2	1.63	60	73	54.89	125	0	0
2	32286064	32286064	T	A	SNP	Slc25a25	ENSMUST00000052119	mouse	ensembl	58_37k	-1	known	silent	c.204	p.A68	0	superfamily_SSF47473	superfamily_Mitoch_carrier,HMMSmart_EFh,HMMPfam_Mito_carr,HMMPfam_efhand,superfamily_SSF47473	0	no_errors	MOC22	29	0	0	15	13	46.43	17	0	0	21	0	0
2	32308432	32308432	G	A	SNP	Naif1	NM_194335.2	mouse	genbank	58_37k	1	provisional	silent	c.474	p.T158	0	NULL	NULL	0	no_errors	MOC23	71	0	0	72	0	0	29	9	23.68	56	1	1.75
2	32413545	32413545	A	T	SNP	Fam102a	NM_153560.4	mouse	genbank	58_37k	1	provisional	splice_site	c.147-2	e2-2	0	0	0	0	no_errors	MOC23	203	0	0	210	0	0	114	89	43.84	287	2	0.69
2	32445023	32445023	T	A	SNP	St6galnac4	NM_011373.2	mouse	genbank	58_37k	1	provisional	missense	c.71	p.L24Q	0	HMMPfam_Glyco_transf_29	HMMPfam_Glyco_transf_29	0	no_errors	MOC1	132	79	37.44	208	0	0	146	0	0	230	0	0
2	32474892	32474892	A	T	SNP	St6galnac6	NM_016973.2	mouse	genbank	58_37k	1	validated	missense	c.845	p.H282L	0	HMMPfam_Glyco_transf_29	HMMPfam_Glyco_transf_29	0	no_errors	MOC22	171	0	0	102	87	46.03	185	1	0.54	229	0	0
2	32588528	32588528	G	T	SNP	6330409D20Rik	ENSMUST00000009695	mouse	ensembl	58_37k	-1	known	missense	c.475	p.Q159K	0	NULL	NULL	0	no_errors	MOC22	75	0	0	39	25	39.06	46	1	2.13	38	0	0
2	32604990	32604990	T	A	SNP	Sh2d3c	NM_013781.2	mouse	genbank	58_37k	1	provisional	missense	c.1567	p.L523I	0	NULL	HMMPfam_SH2,HMMSmart_SM00252,HMMSmart_SM00147,superfamily_Ras GEF,superfamily_SH2 domain	0	no_errors	MOC23	125	0	0	132	0	0	54	67	54.92	122	0	0
2	32617200	32617200	A	T	SNP	Tor2a	NM_152800.2	mouse	genbank	58_37k	1	provisional	missense	c.906	p.E302D	0	HMMPfam_Torsin	HMMPfam_Torsin,superfamily_P-loop containing nucleoside triphosphate hydrolases	0	no_errors	MOC22	95	0	0	44	33	42.86	71	1	1.39	79	0	0
2	32919526	32919526	C	A	SNP	Garnl3	NM_178888.4	mouse	genbank	58_37k	-1	provisional	nonsense	c.151	p.E51*	0	NULL	HMMPfam_Rap_GAP,HMMPfam_CNH,superfamily_SSF111347	0	no_errors	MOC23	163	1	0.61	148	1	0.67	76	59	43.7	163	0	0
2	33083914	33083914	T	A	SNP	Angptl2	NM_011923.4	mouse	genbank	58_37k	1	provisional	missense	c.179	p.V60E	0	NULL	HMMPfam_Fibrinogen_C,HMMSmart_FBG,PatternScan_FIBRIN_AG_C_DOMAIN,superfamily_Fibrinogen_a/b/g_C	0	no_errors	MOC22	63	0	0	30	30	50	65	0	0	75	0	0
2	33116042	33116042	T	A	SNP	Ralgps1	NM_175211.4	mouse	genbank	58_37k	-1	provisional	missense	c.566	p.D189V	0	HMMPfam_RasGEF,HMMSmart_SM00147,superfamily_Ras GEF	HMMPfam_PH,HMMSmart_SM00233,HMMPfam_RasGEF,HMMSmart_SM00147,superfamily_Ras GEF,superfamily_PH domain-like	0	no_errors	MOC23	100	0	0	93	1	1.06	48	30	37.97	87	0	0
2	33508258	33508258	A	T	SNP	LOC100041918	XR_033935.1	mouse	genbank	58_37k	-1	model	rna	NULL	NULL	0	0	0	0	pseudogene	MOC22	24	0	0	16	13	44.83	29	1	3.33	25	0	0
2	34533590	34533590	C	A	SNP	Gapvd1	NM_025709.2	mouse	genbank	58_37k	-1	provisional	silent	c.4281	p.V1427	0	HMMPfam_VPS9,HMMSmart_VPS9,superfamily_SSF109993	HMMPfam_RasGAP,HMMPfam_VPS9,superfamily_Rho_GAP,HMMSmart_VPS9,superfamily_SSF109993	0	no_errors	MOC23	107	1	0.93	108	0	0	79	45	36.29	115	1	0.86
2	34721051	34721051	T	C	SNP	Psmd5	NM_080554.2	mouse	genbank	58_37k	-1	validated	missense	c.557	p.Y186C	0	superfamily_ARM repeat,HMMPfam_Proteasom_PSMB	superfamily_ARM repeat,HMMPfam_Proteasom_PSMB	0	no_errors	MOC1	22	16	42.11	20	0	0	25	0	0	26	0	0
2	34844733	34844733	T	C	SNP	Hc	NM_010406.2	mouse	genbank	58_37k	-1	validated	silent	c.4626	p.E1542	0	superfamily_TIMP-like	HMMPfam_ANATO,HMMSmart_SM00104,PatternScan_ANAPHYLATOXIN_1,HMMPfam_A2M,HMMPfam_A2M_N,superfamily_Terpenoid cyclases/Protein prenyltransferases,superfamily_TIMP-like,HMMPfam_A2M_recep,superfamily_Alpha-macroglobulin receptor domain,HMMPfam_A2M_N_2,HMMPfam_A2M_comp,superfamily_Anaphylotoxins (complement system),HMMPfam_NTR,HMMSmart_SM00643	0	no_errors	MOC23	103	0	0	98	0	0	49	51	51	110	1	0.9
2	34865588	34865588	A	T	SNP	Hc	NM_010406.2	mouse	genbank	58_37k	-1	validated	silent	c.3252	p.A1084	0	superfamily_Terpenoid cyclases/Protein prenyltransferases,HMMPfam_A2M_comp	HMMPfam_ANATO,HMMSmart_SM00104,PatternScan_ANAPHYLATOXIN_1,HMMPfam_A2M,HMMPfam_A2M_N,superfamily_Terpenoid cyclases/Protein prenyltransferases,superfamily_TIMP-like,HMMPfam_A2M_recep,superfamily_Alpha-macroglobulin receptor domain,HMMPfam_A2M_N_2,HMMPfam_A2M_comp,superfamily_Anaphylotoxins (complement system),HMMPfam_NTR,HMMSmart_SM00643	0	no_errors	MOC22	138	0	0	64	73	53.28	91	0	0	93	0	0
2	35045568	35045568	C	A	SNP	Rab14	NM_026697.3	mouse	genbank	58_37k	-1	validated	missense	c.136	p.V46F	0	HMMSmart_SM00176,HMMSmart_SM00173,HMMSmart_SM00174,HMMSmart_SM00175,HMMPfam_Ras,superfamily_P-loop containing nucleoside triphosphate hydrolases	HMMSmart_SM00176,HMMSmart_SM00173,HMMSmart_SM00174,HMMSmart_SM00175,HMMPfam_Ras,superfamily_P-loop containing nucleoside triphosphate hydrolases	0	no_errors	MOC23	146	0	0	133	0	0	59	51	46.36	115	0	0
2	35263567	35263567	T	A	SNP	Ggta1	NM_010283.3	mouse	genbank	58_37k	-1	validated	missense	c.320	p.K107M	0	HMMPfam_Glyco_transf_6,superfamily_SSF53448	HMMPfam_Glyco_transf_6,superfamily_SSF53448	0	no_errors	MOC1	40	77	65.81	99	0	0	74	0	0	79	0	0
2	35583630	35583630	T	C	SNP	Dab2ip	NM_001001602.	mouse	genbank	58_37k	1	validated	missense	c.2876	p.L959P	0	NULL	HMMPfam_C2,HMMSmart_SM00239,HMMPfam_RasGAP,HMMSmart_SM00323,PatternScan_RAS_GTPASE_ACTIV_1,superfamily_GTPase activation domain GAP,superfamily_C2 domain (Calcium/lipid-binding domain CaLB)	0	no_errors	MOC1	76	101	57.06	142	0	0	148	0	0	201	0	0
2	35639664	35639664	G	C	SNP	Ttll11	NM_028921.2	mouse	genbank	58_37k	-1	validated	silent	c.1218	p.L406	0	NULL	HMMPfam_TTL,superfamily_Glutathione synthetase ATP-binding domain-like	0	no_errors	MOC23	58	0	0	45	0	0	15	13	46.43	56	0	0
2	35758117	35758117	T	A	SNP	Ttll11	NM_028921.2	mouse	genbank	58_37k	-1	validated	silent	c.681	p.T227	0	HMMPfam_TTL,superfamily_Glutathione synthetase ATP-binding domain-like	HMMPfam_TTL,superfamily_Glutathione synthetase ATP-binding domain-like	0	no_errors	MOC22	67	0	0	32	16	33.33	40	0	0	59	0	0
2	36098294	36098294	A	G	SNP	Ptgs1	NM_008969.3	mouse	genbank	58_37k	1	provisional	silent	c.783	p.G261	0	HMMPfam_An_peroxidase,superfamily_Heme-dependent peroxidases	HMMPfam_An_peroxidase,superfamily_Heme-dependent peroxidases,HMMPfam_EGF_2,superfamily_EGF/Laminin	0	no_errors	MOC23	150	0	0	173	1	0.57	76	58	43.28	209	0	0
2	36232385	36232385	C	A	SNP	Olfr338	NM_146947.1	mouse	genbank	58_37k	1	provisional	missense	c.88	p.L30M	0	superfamily_SSF81321	HMMPfam_7tm_1,PatternScan_G_PROTEIN_RECEP_F1_1,PatternScan_C_TYPE_LECTIN_1,superfamily_SSF81321	0	no_errors	MOC23	442	0	0	444	2	0.45	172	210	54.97	581	1	0.17
2	36335435	36335435	A	T	SNP	Olfr341	NM_146950.1	mouse	genbank	58_37k	-1	provisional	missense	c.214	p.S72T	0	HMMPfam_7tm_1,superfamily_SSF81321	HMMPfam_7tm_1,PatternScan_G_PROTEIN_RECEP_F1_1,superfamily_SSF81321	0	no_errors	MOC23	555	0	0	598	0	0	230	270	54	773	0	0
2	36424465	36424465	A	G	SNP	Olfr344	NM_146628.1	mouse	genbank	58_37k	1	provisional	missense	c.346	p.T116A	0	HMMPfam_7tm_1,superfamily_SSF81321	HMMPfam_7tm_1,superfamily_SSF81321	0	no_errors	MOC23	328	0	0	392	0	0	148	180	54.71	391	1	0.26
2	36543562	36543562	C	G	SNP	Olfr346	NM_146938.1	mouse	genbank	58_37k	1	provisional	missense	c.39	p.I13M	0	superfamily_SSF81321	HMMPfam_7tm_1,PatternScan_G_PROTEIN_RECEP_F1_1,superfamily_SSF81321	0	no_errors	MOC23	224	0	0	366	0	0	166	105	38.6	411	0	0
2	36649199	36649199	T	A	SNP	Olfr50	NM_146946.1	mouse	genbank	58_37k	1	provisional	missense	c.442	p.S148T	0	HMMPfam_7tm_1,superfamily_SSF81321	HMMPfam_7tm_1,PatternScan_G_PROTEIN_RECEP_F1_1,superfamily_SSF81321	0	no_errors	MOC23	269	0	0	333	0	0	128	135	50.94	361	0	0
2	36746244	36746244	C	T	SNP	Olfr353	NM_146941.1	mouse	genbank	58_37k	-1	provisional	silent	c.123	p.V41	0	HMMPfam_7tm_1,superfamily_SSF81321	HMMPfam_7tm_1,PatternScan_G_PROTEIN_RECEP_F1_1,superfamily_SSF81321	0	no_errors	MOC23	184	0	0	215	0	0	70	63	46.67	204	0	0
2	36762824	36762824	T	A	SNP	Olfr354	NM_146939.1	mouse	genbank	58_37k	1	provisional	silent	c.357	p.A119	0	HMMPfam_7tm_1,PatternScan_G_PROTEIN_RECEP_F1_1,superfamily_SSF81321	HMMPfam_7tm_1,PatternScan_G_PROTEIN_RECEP_F1_1,superfamily_SSF81321	0	no_errors	MOC23	116	0	0	110	0	0	34	59	63.44	112	1	0.88
2	36783145	36783145	A	T	SNP	Olfr355	NM_146625.1	mouse	genbank	58_37k	-1	provisional	nonsense	c.488	p.L163*	0	HMMPfam_7tm_1,superfamily_SSF81321	HMMPfam_7tm_1,PatternScan_G_PROTEIN_RECEP_F1_1,superfamily_SSF81321	0	no_errors	MOC22	42	0	0	18	27	60	49	0	0	58	0	0
2	36792769	36792769	A	G	SNP	Olfr356	NM_146624.1	mouse	genbank	58_37k	1	provisional	silent	c.129	p.T43	0	HMMPfam_7tm_1,superfamily_SSF81321	HMMPfam_7tm_1,superfamily_SSF81321	0	no_errors	MOC23	258	0	0	270	0	0	92	124	57.41	280	0	0
2	36923955	36923955	T	A	SNP	Olfr360	NM_146622.1	mouse	genbank	58_37k	1	provisional	silent	c.129	p.T43	0	HMMPfam_7tm_1,superfamily_SSF81321	HMMPfam_7tm_1,PatternScan_G_PROTEIN_RECEP_F1_1,PatternScan_LECTIN_LEGUME_ALPHA,superfamily_SSF81321	0	no_errors	MOC1	132	171	56.44	348	0	0	292	1	0.34	359	0	0
2	36940418	36940418	C	A	SNP	Olfr361	NM_146368.1	mouse	genbank	58_37k	-1	provisional	missense	c.849	p.M283I	0	HMMPfam_7tm_1,superfamily_SSF81321	HMMPfam_7tm_1,PatternScan_G_PROTEIN_RECEP_F1_1,PatternScan_LECTIN_LEGUME_ALPHA,superfamily_SSF81321	0	no_errors	MOC1	63	56	47.06	156	0	0	108	0	0	167	0	0
2	37057490	37057490	G	C	SNP	Olfr365	NM_146662.1	mouse	genbank	58_37k	1	provisional	missense	c.728	p.C243S	0	HMMPfam_7tm_1,superfamily_SSF81321	HMMPfam_7tm_1,superfamily_SSF81321	0	no_errors	MOC23	253	0	0	275	2	0.72	97	140	58.82	275	1	0.36
2	37126373	37126373	G	T	SNP	Olfr367	NM_001081010.2	mouse	genbank	58_37k	1	provisional	missense	c.426	p.M142I	0	HMMPfam_7tm_1,superfamily_Family A G protein-coupled receptor-like	HMMPfam_7tm_1,superfamily_Family A G protein-coupled receptor-like	0	no_errors	MOC1	215	117	35.24	400	0	0	364	0	0	554	0	0
2	37187623	37187623	T	G	SNP	Olfr368	NM_146374.1	mouse	genbank	58_37k	1	provisional	missense	c.355	p.L119V	0	HMMPfam_7tm_1,PatternScan_G_PROTEIN_RECEP_F1_1,superfamily_SSF81321	HMMPfam_7tm_1,PatternScan_G_PROTEIN_RECEP_F1_1,superfamily_SSF81321	0	no_errors	MOC22	305	0	0	180	151	45.48	310	2	0.64	390	0	0
2	37187928	37187928	G	T	SNP	Olfr368	NM_146374.1	mouse	genbank	58_37k	1	provisional	silent	c.660	p.V220	0	HMMPfam_7tm_1,superfamily_SSF81321	HMMPfam_7tm_1,PatternScan_G_PROTEIN_RECEP_F1_1,superfamily_SSF81321	0	no_errors	MOC22	142	0	0	89	81	47.65	153	0	0	193	0	0
2	37230950	37230950	T	A	SNP	Rc3h2	ENSMUST00000100143	mouse	ensembl	58_37k	-1	known	splice_site	c.3369-2	e20-2	0	0	0	0	no_errors	MOC22	71	0	0	36	29	44.62	70	0	0	86	0	0
2	37292305	37292305	C	G	SNP	Zbtb26	NM_199025.2	mouse	genbank	58_37k	-1	provisional	missense	c.205	p.E69Q	0	HMMSmart_BTB,superfamily_BTB/POZ_fold,HMMPfam_BTB	HMMSmart_BTB,HMMPfam_zf-C2H2,PatternScan_ZINC_FINGER_C2H2_1,superfamily_BTB/POZ_fold,HMMPfam_BTB,HMMSmart_ZnF_C2H2,PatternScan_LECTIN_LEGUME_BETA,superfamily_SSF57667	0	no_errors	MOC1	72	86	54.09	217	0	0	151	0	0	199	0	0
2	37482961	37482961	C	T	SNP	Strbp	NM_009261.3	mouse	genbank	58_37k	-1	validated	nonsense	c.621	p.W207*	0	HMMPfam_DZF,HMMSmart_SM00572	HMMPfam_dsrm,HMMSmart_SM00358,HMMPfam_DZF,HMMSmart_SM00572,superfamily_dsRNA-binding domain-like	0	no_errors	MOC23	66	0	0	61	0	0	30	9	23.08	46	0	0
2	37645923	37645923	G	T	SNP	Crb2	ENSMUST00000050372	mouse	ensembl	58_37k	1	known	missense	c.1342	p.V448L	0	superfamily_ConA_like_lec_gl	PatternScan_ASX_HYDROXYL,HMMSmart_LamG,HMMSmart_EGF_CA,HMMPfam_EGF,HMMSmart_EGF,superfamily_ConA_like_lec_gl,HMMPfam_Laminin_G_2,PatternScan_EGF_1,PatternScan_EGF_2,PatternScan_EGF_CA,superfamily_SSF57196	0	no_errors	MOC22	137	0	0	67	60	47.24	120	0	0	143	1	0.69
2	38208919	38208919	A	T	SNP	Lhx2	NM_010710.3	mouse	genbank	58_37k	1	provisional	missense	c.209	p.D70V	0	HMMPfam_LIM,HMMSmart_SM00132,PatternScan_LIM_DOMAIN_1,superfamily_Glucocorticoid receptor-like (DNA-binding domain)	HMMPfam_Homeobox,HMMSmart_SM00389,HMMPfam_LIM,HMMSmart_SM00132,PatternScan_LIM_DOMAIN_1,superfamily_Homeodomain-like,PatternScan_HOMEOBOX_1,superfamily_Glucocorticoid receptor-like (DNA-binding domain)	0	no_errors	MOC23	119	0	0	134	1	0.74	34	45	56.96	127	0	0
2	38224481	38224481	G	A	SNP	Lhx2	NM_010710.3	mouse	genbank	58_37k	1	provisional	silent	c.1053	p.S351	0	NULL	HMMPfam_Homeobox,HMMSmart_SM00389,HMMPfam_LIM,HMMSmart_SM00132,PatternScan_LIM_DOMAIN_1,superfamily_Homeodomain-like,PatternScan_HOMEOBOX_1,superfamily_Glucocorticoid receptor-like (DNA-binding domain)	0	no_errors	MOC23	104	0	0	115	0	0	55	53	49.07	117	0	0
2	38563857	38563857	G	C	SNP	Nr5a1	NM_139051.3	mouse	genbank	58_37k	-1	provisional	silent	c.447	p.P149	0	superfamily_Str_ncl_receptor	HMMPfam_Hormone_recep,HMMSmart_HOLI,HMMPfam_zf-C4,HMMSmart_ZnF_C4,PatternScan_NUCLEAR_REC_DBD_1,superfamily_Str_ncl_receptor,superfamily_SSF57716	0	no_errors	MOC23	139	0	0	140	0	0	64	77	54.61	145	0	0
2	38595947	38595947	T	A	SNP	Nr6a1	NM_010264.4	mouse	genbank	58_37k	-1	validated	silent	c.822	p.S274	0	superfamily_Nuclear receptor ligand-binding domain	HMMPfam_Hormone_recep,HMMSmart_SM00430,HMMPfam_zf-C4,HMMSmart_SM00399,PatternScan_NUCLEAR_REC_DBD_1,superfamily_Nuclear receptor ligand-binding domain,superfamily_Glucocorticoid receptor-like (DNA-binding domain)	0	no_errors	MOC1	21	46	68.66	139	0	0	80	0	0	90	0	0
2	38802794	38802794	T	A	SNP	Olfml2a	NM_172854.2	mouse	genbank	58_37k	1	provisional	missense	c.428	p.V143E	0	NULL	HMMPfam_OLF,HMMSmart_SM00284	0	no_errors	MOC1	107	158	59.18	227	0	0	181	2	1.09	256	0	0
2	38815429	38815429	G	C	SNP	Olfml2a	NM_172854.2	mouse	genbank	58_37k	1	provisional	missense	c.1636	p.G546R	0	HMMPfam_OLF,HMMSmart_SM00284	HMMPfam_OLF,HMMSmart_SM00284	0	no_errors	MOC22	171	0	0	89	67	42.95	155	1	0.64	203	2	0.98
2	38894585	38894585	T	A	SNP	Golga1	NM_029793.1	mouse	genbank	58_37k	-1	provisional	missense	c.1040	p.K347M	0	NULL	HMMPfam_GRIP,HMMSmart_SM00755	0	no_errors	MOC23	152	0	0	152	0	0	63	48	43.24	132	0	0
2	39983355	39983355	T	A	SNP	LOC100042604	XM_001479550.1	mouse	genbank	58_37k	-1	model	missense	c.26	p.Q9L	0	HMMPfam_V-ATPase_G	HMMPfam_V-ATPase_G	0	pseudogene	MOC1	15	6	28.57	20	0	0	18	0	0	12	0	0
2	40452513	40452513	C	G	SNP	Lrp1b	NM_053011.2	mouse	genbank	58_37k	-1	validated	missense	c.13741	p.E4581Q	0	NULL	HMMPfam_Ldl_recept_b,HMMSmart_SM00135,PatternScan_ASX_HYDROXYL,HMMPfam_NHL,HMMSmart_SM00179,HMMPfam_Ldl_recept_a,HMMSmart_SM00192,PatternScan_LDLRA_1,superfamily_LDL receptor-like module,HMMPfam_EGF,HMMSmart_SM00181,PatternScan_EGF_1,PatternScan_EGF_2,HMMPfam_EGF_CA,PatternScan_EGF_CA,superfamily_EGF/Laminin,superfamily_YWTD domain	0	no_errors	MOC23	174	0	0	168	0	0	56	64	53.33	209	1	0.48
2	40512927	40512927	G	C	SNP	Lrp1b	NM_053011.2	mouse	genbank	58_37k	-1	validated	missense	c.12762	p.S4254R	0	HMMSmart_SM00179,HMMPfam_EGF,HMMSmart_SM00181,superfamily_EGF/Laminin	HMMPfam_Ldl_recept_b,HMMSmart_SM00135,PatternScan_ASX_HYDROXYL,HMMPfam_NHL,HMMSmart_SM00179,HMMPfam_Ldl_recept_a,HMMSmart_SM00192,PatternScan_LDLRA_1,superfamily_LDL receptor-like module,HMMPfam_EGF,HMMSmart_SM00181,PatternScan_EGF_1,PatternScan_EGF_2,HMMPfam_EGF_CA,PatternScan_EGF_CA,superfamily_EGF/Laminin,superfamily_YWTD domain	0	no_errors	MOC23	32	0	0	37	0	0	20	13	39.39	49	0	0
2	40512928	40512928	C	T	SNP	Lrp1b	NM_053011.2	mouse	genbank	58_37k	-1	validated	missense	c.12761	p.S4254N	0	HMMSmart_SM00179,HMMPfam_EGF,HMMSmart_SM00181,superfamily_EGF/Laminin	HMMPfam_Ldl_recept_b,HMMSmart_SM00135,PatternScan_ASX_HYDROXYL,HMMPfam_NHL,HMMSmart_SM00179,HMMPfam_Ldl_recept_a,HMMSmart_SM00192,PatternScan_LDLRA_1,superfamily_LDL receptor-like module,HMMPfam_EGF,HMMSmart_SM00181,PatternScan_EGF_1,PatternScan_EGF_2,HMMPfam_EGF_CA,PatternScan_EGF_CA,superfamily_EGF/Laminin,superfamily_YWTD domain	0	no_errors	MOC23	33	0	0	37	0	0	20	13	39.39	49	0	0
2	40533104	40533104	T	A	SNP	Lrp1b	NM_053011.2	mouse	genbank	58_37k	-1	validated	missense	c.12130	p.T4044S	0	HMMPfam_Ldl_recept_b,HMMSmart_SM00135,superfamily_YWTD domain	HMMPfam_Ldl_recept_b,HMMSmart_SM00135,PatternScan_ASX_HYDROXYL,HMMPfam_NHL,HMMSmart_SM00179,HMMPfam_Ldl_recept_a,HMMSmart_SM00192,PatternScan_LDLRA_1,superfamily_LDL receptor-like module,HMMPfam_EGF,HMMSmart_SM00181,PatternScan_EGF_1,PatternScan_EGF_2,HMMPfam_EGF_CA,PatternScan_EGF_CA,superfamily_EGF/Laminin,superfamily_YWTD domain	0	no_errors	MOC23	149	0	0	114	0	0	63	26	29.21	143	0	0
2	40558331	40558331	A	T	SNP	Lrp1b	NM_053011.2	mouse	genbank	58_37k	-1	validated	missense	c.11295	p.D3765E	0	HMMPfam_Ldl_recept_a,HMMSmart_SM00192,superfamily_LDL receptor-like module	HMMPfam_Ldl_recept_b,HMMSmart_SM00135,PatternScan_ASX_HYDROXYL,HMMPfam_NHL,HMMSmart_SM00179,HMMPfam_Ldl_recept_a,HMMSmart_SM00192,PatternScan_LDLRA_1,superfamily_LDL receptor-like module,HMMPfam_EGF,HMMSmart_SM00181,PatternScan_EGF_1,PatternScan_EGF_2,HMMPfam_EGF_CA,PatternScan_EGF_CA,superfamily_EGF/Laminin,superfamily_YWTD domain	0	no_errors	MOC22	88	0	0	40	43	51.81	68	0	0	118	0	0
2	40580938	40580938	A	T	SNP	Lrp1b	NM_053011.2	mouse	genbank	58_37k	-1	validated	missense	c.10972	p.C3658S	0	HMMPfam_Ldl_recept_a,HMMSmart_SM00192,PatternScan_LDLRA_1,superfamily_LDL receptor-like module	HMMPfam_Ldl_recept_b,HMMSmart_SM00135,PatternScan_ASX_HYDROXYL,HMMPfam_NHL,HMMSmart_SM00179,HMMPfam_Ldl_recept_a,HMMSmart_SM00192,PatternScan_LDLRA_1,superfamily_LDL receptor-like module,HMMPfam_EGF,HMMSmart_SM00181,PatternScan_EGF_1,PatternScan_EGF_2,HMMPfam_EGF_CA,PatternScan_EGF_CA,superfamily_EGF/Laminin,superfamily_YWTD domain	0	no_errors	MOC23	289	0	0	345	0	0	99	175	63.87	394	0	0
2	41049197	41049197	A	T	SNP	Lrp1b	NM_053011.2	mouse	genbank	58_37k	-1	validated	missense	c.5361	p.D1787E	0	HMMPfam_Ldl_recept_b,superfamily_YWTD domain	HMMPfam_Ldl_recept_b,HMMSmart_SM00135,PatternScan_ASX_HYDROXYL,HMMPfam_NHL,HMMSmart_SM00179,HMMPfam_Ldl_recept_a,HMMSmart_SM00192,PatternScan_LDLRA_1,superfamily_LDL receptor-like module,HMMPfam_EGF,HMMSmart_SM00181,PatternScan_EGF_1,PatternScan_EGF_2,HMMPfam_EGF_CA,PatternScan_EGF_CA,superfamily_EGF/Laminin,superfamily_YWTD domain	0	no_errors	MOC23	81	0	0	129	1	0.76	42	40	48.78	125	0	0
2	41158456	41158456	A	T	SNP	Lrp1b	NM_053011.2	mouse	genbank	58_37k	-1	validated	silent	c.4038	p.A1346	0	HMMSmart_SM00135,superfamily_YWTD domain	HMMPfam_Ldl_recept_b,HMMSmart_SM00135,PatternScan_ASX_HYDROXYL,HMMPfam_NHL,HMMSmart_SM00179,HMMPfam_Ldl_recept_a,HMMSmart_SM00192,PatternScan_LDLRA_1,superfamily_LDL receptor-like module,HMMPfam_EGF,HMMSmart_SM00181,PatternScan_EGF_1,PatternScan_EGF_2,HMMPfam_EGF_CA,PatternScan_EGF_CA,superfamily_EGF/Laminin,superfamily_YWTD domain	0	no_errors	MOC22	54	0	0	34	24	41.38	31	0	0	57	0	0
2	41332210	41332210	G	T	SNP	Lrp1b	NM_053011.2	mouse	genbank	58_37k	-1	validated	missense	c.1915	p.L639M	0	HMMPfam_Ldl_recept_b,HMMSmart_SM00135,superfamily_YWTD domain	HMMPfam_Ldl_recept_b,HMMSmart_SM00135,PatternScan_ASX_HYDROXYL,HMMPfam_NHL,HMMSmart_SM00179,HMMPfam_Ldl_recept_a,HMMSmart_SM00192,PatternScan_LDLRA_1,superfamily_LDL receptor-like module,HMMPfam_EGF,HMMSmart_SM00181,PatternScan_EGF_1,PatternScan_EGF_2,HMMPfam_EGF_CA,PatternScan_EGF_CA,superfamily_EGF/Laminin,superfamily_YWTD domain	0	no_errors	MOC23	47	0	0	52	0	0	26	18	40.91	51	0	0
2	43920585	43920585	A	T	SNP	Arhgap15	NM_153820.3	mouse	genbank	58_37k	1	validated	missense	c.679	p.I227F	0	NULL	HMMPfam_RhoGAP,HMMSmart_SM00324,HMMPfam_PH,HMMSmart_SM00233,superfamily_GTPase activation domain GAP,superfamily_PH domain-like	0	no_errors	MOC22	104	0	0	51	45	46.88	91	0	0	147	0	0
2	44844476	44844476	C	A	SNP	Zeb2	NM_015753.3	mouse	genbank	58_37k	-1	validated	nonsense	c.3265	p.E1089*	0	NULL	HMMSmart_HOX,HMMPfam_zf-C2H2,PatternScan_ZINC_FINGER_C2H2_1,HMMSmart_ZnF_C2H2,superfamily_SSF57667	0	no_errors	MOC23	30	0	0	33	0	0	10	14	58.33	38	0	0
2	44852639	44852639	T	G	SNP	Zeb2	NM_015753.3	mouse	genbank	58_37k	-1	validated	missense	c.1793	p.Q598P	0	HMMSmart_ZnF_C2H2	HMMSmart_HOX,HMMPfam_zf-C2H2,PatternScan_ZINC_FINGER_C2H2_1,HMMSmart_ZnF_C2H2,superfamily_SSF57667	0	no_errors	MOC23	267	0	0	293	0	0	103	69	40.12	286	0	0
2	44853364	44853364	A	T	SNP	Zeb2	NM_015753.3	mouse	genbank	58_37k	-1	validated	silent	c.1068	p.S356	0	NULL	HMMSmart_HOX,HMMPfam_zf-C2H2,PatternScan_ZINC_FINGER_C2H2_1,HMMSmart_ZnF_C2H2,superfamily_SSF57667	0	no_errors	MOC23	83	0	0	75	0	0	27	21	43.75	57	1	1.72
2	48726009	48726009	T	G	SNP	Acvr2a	NM_007396.4	mouse	genbank	58_37k	1	validated	missense	c.256	p.Y86D	0	HMMPfam_Activin_recp,superfamily_Snake toxin-like	HMMPfam_Activin_recp,HMMSmart_SM00219,HMMSmart_SM00220,PatternScan_PROTEIN_KINASE_ST,superfamily_Protein kinase-like (PK-like),HMMPfam_Pkinase,superfamily_Snake toxin-like	0	no_errors	MOC22	94	0	0	64	49	43.36	78	0	0	98	0	0
2	49113817	49113817	A	T	SNP	Mbd5	NM_029924.2	mouse	genbank	58_37k	1	validated	missense	c.2518	p.T840S	0	NULL	HMMPfam_PWWP,HMMPfam_MBD,superfamily_SSF63748	0	no_errors	MOC23	112	0	0	151	1	0.66	41	63	60.58	118	0	0
2	49130154	49130154	A	T	SNP	Mbd5	NM_029924.2	mouse	genbank	58_37k	1	validated	missense	c.3622	p.N1208Y	0	NULL	HMMPfam_PWWP,HMMPfam_MBD,superfamily_SSF63748	0	no_errors	MOC1	86	132	60.55	207	0	0	187	0	0	268	0	0
2	50378156	50378156	T	C	SNP	LOC666781	XR_034337.1	mouse	genbank	58_37k	-1	model	rna	NULL	NULL	0	0	0	0	pseudogene	MOC23	28	0	0	16	0	0	11	8	42.11	19	0	0
2	51780985	51780985	T	A	SNP	Rbm43	NM_030243.4	mouse	genbank	58_37k	-1	validated	missense	c.743	p.Q248L	0	NULL	superfamily_RNA-binding domain RBD	0	no_errors	MOC1	115	77	40.1	225	0	0	186	0	0	190	0	0
2	51938238	51938238	G	A	SNP	Rif1	NM_175238.5	mouse	genbank	58_37k	1	validated	silent	c.840	p.L280	0	superfamily_ARM repeat	superfamily_ARM repeat	0	no_errors	MOC22	138	1	0.72	85	68	44.44	114	0	0	128	1	0.78
2	52047455	52047455	G	A	SNP	Neb	ENSMUST00000036934	mouse	ensembl	58_37k	-1	known	silent	c.16494	p.N5498	0	HMMPfam_Nebulin,HMMSmart_NEBU	HMMPfam_Nebulin,HMMSmart_NEBU,HMMPfam_SH3_1,HMMSmart_SH3,superfamily_SH3	0	no_errors	MOC22	207	0	0	164	60	26.67	166	0	0	228	0	0
2	52141526	52141526	T	G	SNP	Neb	ENSMUST00000036934	mouse	ensembl	58_37k	-1	known	silent	c.4440	p.P1480	0	HMMSmart_NEBU	HMMPfam_Nebulin,HMMSmart_NEBU,HMMPfam_SH3_1,HMMSmart_SH3,superfamily_SH3	0	no_errors	MOC23	158	0	0	164	0	0	82	44	34.92	166	0	0
2	52150890	52150890	C	A	SNP	Neb	ENSMUST00000036934	mouse	ensembl	58_37k	-1	known	missense	c.2849	p.W950L	0	HMMPfam_Nebulin	HMMPfam_Nebulin,HMMSmart_NEBU,HMMPfam_SH3_1,HMMSmart_SH3,superfamily_SH3	0	no_errors	MOC23	52	0	0	53	0	0	20	15	42.86	68	0	0
2	52184370	52184370	T	A	SNP	Neb	ENSMUST00000036934	mouse	ensembl	58_37k	-1	known	silent	c.147	p.T49	0	NULL	HMMPfam_Nebulin,HMMSmart_NEBU,HMMPfam_SH3_1,HMMSmart_SH3,superfamily_SH3	0	no_errors	MOC1	50	26	33.77	71	1	1.37	60	0	0	74	0	0
2	52320179	52320179	T	A	SNP	Cacnb4	NM_001037099.1	mouse	genbank	58_37k	-1	validated	missense	c.706	p.M236L	0	HMMPfam_Ca_channel_B,HMMSmart_SM00072,superfamily_P-loop containing nucleoside triphosphate hydrolases	HMMPfam_Ca_channel_B,superfamily_SH3-domain,HMMSmart_SM00072,superfamily_P-loop containing nucleoside triphosphate hydrolases	0	no_errors	MOC23	169	0	0	172	0	0	70	66	48.53	180	0	0
2	52321423	52321423	C	A	SNP	Cacnb4	NM_001037099.1	mouse	genbank	58_37k	-1	validated	missense	c.606	p.K202N	0	superfamily_SH3-domain,superfamily_P-loop containing nucleoside triphosphate hydrolases	HMMPfam_Ca_channel_B,superfamily_SH3-domain,HMMSmart_SM00072,superfamily_P-loop containing nucleoside triphosphate hydrolases	0	no_errors	MOC1	47	45	48.91	90	0	0	57	0	0	80	0	0
2	52550294	52550294	T	A	SNP	Stam2	NM_019667.2	mouse	genbank	58_37k	-1	provisional	silent	c.1506	p.P502	0	NULL	HMMPfam_SH3_1,HMMSmart_SM00326,superfamily_SH3-domain,HMMPfam_VHS,HMMPfam_UIM,HMMSmart_SM00726,superfamily_ENTH/VHS domain,HMMSmart_SM00288	0	no_errors	MOC1	52	38	42.22	77	0	0	70	0	0	79	0	0
2	55290047	55290047	T	A	SNP	Kcnj3	NM_008426.1	mouse	genbank	58_37k	1	provisional	missense	c.436	p.Y146N	0	HMMPfam_IRK,superfamily_Voltage-gated potassium channels	HMMPfam_IRK,superfamily_E set domains,superfamily_Voltage-gated potassium channels	0	no_errors	MOC22	184	0	0	84	101	54.59	171	1	0.58	238	0	0
2	57142332	57142332	A	T	SNP	Gpd2	NM_010274.3	mouse	genbank	58_37k	1	validated	missense	c.179	p.Q60L	0	NULL	PatternScan_FAD_G3PDH_1,PatternScan_FAD_G3PDH_2,HMMSmart_EFh,HMMPfam_DAO,PatternScan_EF_HAND_1,HMMPfam_efhand,superfamily_SSF47473,superfamily_SSF51905,superfamily_SSF54373	0	no_errors	MOC1	91	42	31.58	144	0	0	116	0	0	181	0	0
2	57208933	57208933	G	T	SNP	Gpd2	NM_010274.3	mouse	genbank	58_37k	1	validated	missense	c.1480	p.A494S	0	superfamily_SSF51905	PatternScan_FAD_G3PDH_1,PatternScan_FAD_G3PDH_2,HMMSmart_EFh,HMMPfam_DAO,PatternScan_EF_HAND_1,HMMPfam_efhand,superfamily_SSF47473,superfamily_SSF51905,superfamily_SSF54373	0	no_errors	MOC22	118	0	0	58	44	43.14	70	0	0	104	0	0
2	57216710	57216710	A	T	SNP	Gpd2	NM_010274.3	mouse	genbank	58_37k	1	validated	missense	c.1930	p.T644S	0	HMMSmart_EFh,superfamily_SSF47473,superfamily_SSF51905	PatternScan_FAD_G3PDH_1,PatternScan_FAD_G3PDH_2,HMMSmart_EFh,HMMPfam_DAO,PatternScan_EF_HAND_1,HMMPfam_efhand,superfamily_SSF47473,superfamily_SSF51905,superfamily_SSF54373	0	no_errors	MOC23	191	0	0	192	1	0.52	55	80	59.26	181	0	0
2	58004156	58004156	T	A	SNP	Cytip	NM_139200.4	mouse	genbank	58_37k	-1	validated	missense	c.193	p.S65C	0	superfamily_PDZ domain-like	HMMPfam_PDZ,HMMSmart_SM00228,superfamily_PDZ domain-like	0	no_errors	MOC22	43	0	0	26	22	45.83	31	0	0	35	1	2.78
2	58148399	58148399	A	T	SNP	Acvr1c	ENSMUST00000028178	mouse	ensembl	58_37k	-1	known	missense	c.482	p.V161E	0	NULL	HMMPfam_Activin_recp,HMMPfam_TGF_beta_GS,HMMSmart_GS,PatternScan_PROTEIN_KINASE_ST,superfamily_Kinase_like,PatternScan_PROTEIN_KINASE_ATP,HMMPfam_Pkinase,superfamily_SSF57302	0	no_errors	MOC23	236	0	0	272	0	0	110	71	39.23	306	0	0
2	58315334	58315334	T	C	SNP	Acvr1	NM_007394.3	mouse	genbank	58_37k	-1	validated	missense	c.1024	p.I342V	0	HMMSmart_SM00219,HMMSmart_SM00220,PatternScan_PROTEIN_KINASE_ST,superfamily_Protein kinase-like (PK-like),HMMPfam_Pkinase	HMMPfam_Activin_recp,HMMSmart_SM00219,HMMSmart_SM00220,HMMPfam_TGF_beta_GS,HMMSmart_SM00467,PatternScan_PROTEIN_KINASE_ST,superfamily_Protein kinase-like (PK-like),PatternScan_PROTEIN_KINASE_ATP,HMMPfam_Pkinase,superfamily_Snake toxin-like	0	no_errors	MOC22	83	0	0	40	41	50.62	62	0	0	79	0	0
2	58332082	58332082	T	A	SNP	Acvr1	NM_007394.3	mouse	genbank	58_37k	-1	validated	missense	c.325	p.T109S	0	superfamily_Snake toxin-like	HMMPfam_Activin_recp,HMMSmart_SM00219,HMMSmart_SM00220,HMMPfam_TGF_beta_GS,HMMSmart_SM00467,PatternScan_PROTEIN_KINASE_ST,superfamily_Protein kinase-like (PK-like),PatternScan_PROTEIN_KINASE_ATP,HMMPfam_Pkinase,superfamily_Snake toxin-like	0	no_errors	MOC23	61	0	0	82	0	0	15	22	59.46	77	1	1.28
2	59160607	59160607	A	T	SNP	Pkp4	NM_026361.2	mouse	genbank	58_37k	1	validated	missense	c.1741	p.R581W	0	HMMPfam_Arm,HMMSmart_SM00185,superfamily_ARM repeat	HMMPfam_Arm,HMMSmart_SM00185,superfamily_ARM repeat	0	no_errors	MOC23	112	0	0	123	0	0	42	48	53.33	127	0	0
2	59633850	59633850	A	T	SNP	Tanc1	NM_198294.2	mouse	genbank	58_37k	1	provisional	splice_site	c.1495-2	e10-2	0	0	0	0	no_errors	MOC22	66	0	0	21	34	61.82	43	0	0	54	0	0
2	59798125	59798125	T	A	SNP	Baz2b	NM_001001182.	mouse	genbank	58_37k	-1	validated	silent	c.1800	p.S600	0	NULL	HMMPfam_Bromodomain,HMMSmart_BROMO,superfamily_Bromodomain,HMMPfam_MBD,HMMSmart_PHD,HMMPfam_DDT,superfamily_FYVE_PHD_ZnF,superfamily_DNA-binding_integrase-type,PatternScan_BROMODOMAIN_1,HMMSmart_DDT,HMMPfam_PHD	0	no_errors	MOC23	209	0	0	212	0	0	100	83	45.36	191	0	0
2	60079057	60079057	A	T	SNP	2012-03-07	NM_020575.2	mouse	genbank	58_37k	1	provisional	missense	c.1847	p.N616I	0	superfamily_RING/U-box	HMMSmart_SM00744,HMMPfam_zf-C3HC4,superfamily_RING/U-box	0	no_errors	MOC23	119	0	0	121	0	0	46	52	53.06	98	0	0
2	60149693	60149693	T	A	SNP	Ly75	NM_013825.3	mouse	genbank	58_37k	-1	provisional	missense	c.4129	p.S1377C	0	HMMSmart_CLECT	HMMPfam_fn2,HMMSmart_FN2,PatternScan_FN2_1,HMMSmart_RICIN,HMMPfam_Lectin_C,HMMSmart_CLECT,superfamily_RicinB_like,superfamily_Kringle-like,superfamily_C-type_lectin_fold,PatternScan_C_TYPE_LECTIN_1	0	no_errors	MOC22	108	0	0	0	81	100	71	0	0	78	0	0
2	60172575	60172575	T	A	SNP	Ly75	NM_013825.3	mouse	genbank	58_37k	-1	provisional	missense	c.2315	p.K772M	0	HMMSmart_CLECT,superfamily_C-type_lectin_fold	HMMPfam_fn2,HMMSmart_FN2,PatternScan_FN2_1,HMMSmart_RICIN,HMMPfam_Lectin_C,HMMSmart_CLECT,superfamily_RicinB_like,superfamily_Kringle-like,superfamily_C-type_lectin_fold,PatternScan_C_TYPE_LECTIN_1	0	no_errors	MOC22	165	0	0	75	65	46.43	114	0	0	136	0	0
2	60177475	60177475	T	A	SNP	Ly75	ENSMUST00000100079	mouse	ensembl	58_37k	-1	known	missense	c.2323	p.S775C	0	HMMSmart_CLECT	HMMPfam_fn2,HMMSmart_FN2,PatternScan_FN2_1,HMMSmart_RICIN,HMMPfam_Lectin_C,HMMSmart_CLECT,superfamily_RicinB_like,superfamily_Kringle-like,superfamily_C-type_lectin_fold,PatternScan_C_TYPE_LECTIN_1	0	no_errors	MOC23	57	0	0	51	0	0	19	24	55.81	64	0	0
2	60287018	60287018	G	A	SNP	Pla2r1	NM_008867.1	mouse	genbank	58_37k	-1	provisional	silent	c.2274	p.V758	0	HMMPfam_Lectin_C,HMMSmart_SM00034,superfamily_C-type lectin-like	HMMPfam_fn2,HMMSmart_SM00059,PatternScan_FN2_1,HMMSmart_SM00458,HMMPfam_Lectin_C,HMMSmart_SM00034,superfamily_Ricin B-like lectins,superfamily_Kringle-like,superfamily_C-type lectin-like,PatternScan_C_TYPE_LECTIN_1	0	no_errors	MOC22	96	0	0	65	52	44.44	62	0	0	85	1	1.16
2	60465867	60465867	T	A	SNP	Itgb6	NM_021359.3	mouse	genbank	58_37k	-1	validated	missense	c.1598	p.Y533F	0	HMMPfam_EGF_2,superfamily_EGF/Laminin	HMMPfam_Integrin_beta,HMMSmart_SM00187,HMMSmart_SM00423,HMMPfam_Integrin_B_tail,superfamily_Integrin beta tail domain,PatternScan_EGF_1,PatternScan_EGF_2,HMMPfam_EGF_2,HMMPfam_Integrin_b_cyt,PatternScan_INTEGRIN_BETA,superfamily_vWA-like,superfamily_EGF/Laminin,superfamily_Integrin domains	0	no_errors	MOC1	72	107	59.78	118	0	0	124	0	0	125	0	0
2	61643403	61643403	T	A	SNP	Tbr1	NM_009322.3	mouse	genbank	58_37k	1	provisional	silent	c.639	p.L213	0	HMMPfam_T-box,HMMSmart_TBOX,superfamily_P53_like_DNA_bnd,PatternScan_TBOX_1	HMMPfam_T-box,HMMSmart_TBOX,superfamily_P53_like_DNA_bnd,PatternScan_TBOX_2,PatternScan_TBOX_1	0	no_errors	MOC23	93	0	0	95	0	0	52	35	40.23	107	0	0
2	62105604	62105604	T	A	SNP	Slc4a10	NM_033552.2	mouse	genbank	58_37k	1	validated	missense	c.1499	p.L500Q	0	HMMPfam_HCO3_cotransp	HMMPfam_HCO3_cotransp,HMMPfam_Band_3_cyto,superfamily_Phoshotransferase/anion transport protein,PatternScan_HTH_ARAC_FAMILY_1	0	no_errors	MOC1	68	101	59.76	172	0	0	128	0	0	217	0	0
2	62186588	62186588	C	A	SNP	Dpp4	NM_010074.3	mouse	genbank	58_37k	-1	validated	silent	c.1839	p.V613	0	HMMPfam_Peptidase_S9,PatternScan_PRO_ENDOPEP_SER,superfamily_alpha/beta-Hydrolases	HMMPfam_Peptidase_S9,HMMPfam_DPPIV_N,PatternScan_PRO_ENDOPEP_SER,superfamily_alpha/beta-Hydrolases,superfamily_Dipeptidyl peptidase IV/CD26 N-terminal domain	0	no_errors	MOC23	294	0	0	297	1	0.34	132	84	38.89	349	0	0
2	62224558	62224558	T	A	SNP	Dpp4	NM_010074.3	mouse	genbank	58_37k	-1	validated	missense	c.209	p.Q70L	0	superfamily_Dipeptidyl peptidase IV/CD26 N-terminal domain	HMMPfam_Peptidase_S9,HMMPfam_DPPIV_N,PatternScan_PRO_ENDOPEP_SER,superfamily_alpha/beta-Hydrolases,superfamily_Dipeptidyl peptidase IV/CD26 N-terminal domain	0	no_errors	MOC23	119	0	0	94	0	0	32	43	57.33	109	1	0.91
2	62371019	62371019	A	T	SNP	Fap	NM_007986.2	mouse	genbank	58_37k	-1	provisional	missense	c.1223	p.L408Q	0	HMMPfam_DPPIV_N,superfamily_Dipeptidyl peptidase IV/CD26 N-terminal domain	HMMPfam_Peptidase_S9,HMMPfam_DPPIV_N,PatternScan_PRO_ENDOPEP_SER,superfamily_alpha/beta-Hydrolases,superfamily_Dipeptidyl peptidase IV/CD26 N-terminal domain	0	no_errors	MOC1	73	110	60.11	202	0	0	149	0	0	207	0	0
2	62371062	62371062	T	A	SNP	Fap	NM_007986.2	mouse	genbank	58_37k	-1	provisional	nonsense	c.1180	p.K394*	0	HMMPfam_DPPIV_N,superfamily_Dipeptidyl peptidase IV/CD26 N-terminal domain	HMMPfam_Peptidase_S9,HMMPfam_DPPIV_N,PatternScan_PRO_ENDOPEP_SER,superfamily_alpha/beta-Hydrolases,superfamily_Dipeptidyl peptidase IV/CD26 N-terminal domain	0	no_errors	MOC23	195	0	0	203	0	0	79	87	52.41	214	0	0
2	62528107	62528107	T	A	SNP	Gca	NM_145523.3	mouse	genbank	58_37k	1	provisional	missense	c.553	p.C185S	0	superfamily_EF-hand	HMMSmart_SM00054,PatternScan_EF_HAND_1,superfamily_EF-hand	0	no_errors	MOC22	281	0	0	111	139	55.6	196	0	0	322	2	0.62
2	62615648	62615648	C	A	SNP	Kcnh7	NM_133207.2	mouse	genbank	58_37k	-1	validated	missense	c.1645	p.A549S	0	HMMPfam_Ion_trans,superfamily_SSF81324	HMMSmart_PAS,HMMPfam_cNMP_binding,HMMSmart_cNMP,HMMSmart_PAC,HMMPfam_Ion_trans,superfamily_cNMP_binding,superfamily_SSF55785,superfamily_SSF81324	0	no_errors	MOC1	47	59	55.66	116	0	0	77	0	0	129	0	0
2	62625869	62625869	A	G	SNP	Kcnh7	NM_133207.2	mouse	genbank	58_37k	-1	validated	silent	c.1332	p.C444	0	superfamily_SSF81324	HMMSmart_PAS,HMMPfam_cNMP_binding,HMMSmart_cNMP,HMMSmart_PAC,HMMPfam_Ion_trans,superfamily_cNMP_binding,superfamily_SSF55785,superfamily_SSF81324	0	no_errors	MOC23	112	0	0	130	0	0	63	38	37.62	119	0	0
2	64706031	64706031	G	T	SNP	LOC667291	XR_030863.1	mouse	genbank	58_37k	-1	model	rna	NULL	NULL	0	0	0	0	pseudogene	MOC23	96	0	0	99	0	0	50	27	35.06	105	0	0
2	64791626	64791626	T	A	SNP	Grb14	NM_016719.1	mouse	genbank	58_37k	-1	provisional	silent	c.468	p.I156	0	HMMPfam_RA,HMMSmart_SM00314	HMMPfam_RA,HMMSmart_SM00314,HMMPfam_SH2,HMMSmart_SM00252,HMMPfam_PH,HMMSmart_SM00233,HMMPfam_BPS,superfamily_PH domain-like,superfamily_SH2 domain	0	no_errors	MOC22	71	0	0	32	37	53.62	38	0	0	83	0	0
2	64936817	64936817	T	A	SNP	Cobll1	NM_177025.5	mouse	genbank	58_37k	-1	validated	nonsense	c.2332	p.K778*	0	NULL	HMMPfam_Cobl	0	no_errors	MOC1	22	26	54.17	41	0	0	32	0	0	49	0	0
2	64937021	64937021	T	A	SNP	Cobll1	NM_177025.5	mouse	genbank	58_37k	-1	validated	missense	c.2128	p.S710C	0	NULL	HMMPfam_Cobl	0	no_errors	MOC1	46	51	52.58	98	0	0	97	0	0	76	0	0
2	65193384	65193384	C	A	SNP	Slc38a11	NM_177074.2	mouse	genbank	58_37k	-1	validated	nonsense	c.433	p.G145*	0	HMMPfam_Aa_trans	HMMPfam_Aa_trans	0	no_errors	MOC22	154	0	0	0	131	100	110	1	0.9	129	0	0
2	65196179	65196179	A	T	SNP	Slc38a11	NM_177074.2	mouse	genbank	58_37k	-1	validated	missense	c.302	p.V101D	0	HMMPfam_Aa_trans	HMMPfam_Aa_trans	0	no_errors	MOC22	42	0	0	34	20	37.04	47	0	0	46	0	0
2	65302847	65302847	T	C	SNP	Scn3a	NM_018732.3	mouse	genbank	58_37k	-1	validated	missense	c.4768	p.I1590V	0	HMMPfam_Ion_trans,superfamily_Voltage-gated potassium channels	HMMPfam_IQ,HMMPfam_Ion_trans,HMMPfam_Na_trans_assoc,superfamily_Voltage-gated potassium channels	0	no_errors	MOC1	83	64	43.54	166	1	0.6	126	0	0	160	0	0
2	65568269	65568269	G	T	SNP	Scn2a1	ENSMUST00000028377	mouse	ensembl	58_37k	1	known	missense	c.3785	p.W1262L	0	HMMPfam_Ion_trans,superfamily_SSF81324	HMMPfam_IQ,HMMSmart_IQ,HMMPfam_Ion_trans,HMMPfam_Na_trans_assoc,superfamily_SSF81324	0	no_errors	MOC23	219	0	0	227	0	0	119	94	44.13	289	0	0
2	65586432	65586432	A	T	SNP	Scn2a1	ENSMUST00000028377	mouse	ensembl	58_37k	1	known	missense	c.4393	p.T1465S	0	HMMPfam_Ion_trans,superfamily_SSF81324	HMMPfam_IQ,HMMSmart_IQ,HMMPfam_Ion_trans,HMMPfam_Na_trans_assoc,superfamily_SSF81324	0	no_errors	MOC23	154	0	0	124	0	0	72	53	42.4	144	1	0.69
2	65860374	65860374	G	T	SNP	Csrnp3	NM_153409.5	mouse	genbank	58_37k	1	validated	missense	c.1052	p.C351F	0	NULL	NULL	0	no_errors	MOC23	56	0	0	56	0	0	26	27	50.94	69	0	0
2	65860500	65860500	T	A	SNP	Csrnp3	NM_153409.5	mouse	genbank	58_37k	1	validated	missense	c.1178	p.F393Y	0	NULL	NULL	0	no_errors	MOC23	50	0	0	65	0	0	16	24	60	60	1	1.64
2	65860941	65860941	A	C	SNP	Csrnp3	NM_153409.5	mouse	genbank	58_37k	1	validated	missense	c.1619	p.Q540P	0	NULL	NULL	0	no_errors	MOC22	74	0	0	39	32	45.07	61	0	0	85	0	0
2	65929047	65929047	T	A	SNP	Galnt3	NM_015736.2	mouse	genbank	58_37k	-1	validated	missense	c.1531	p.S511C	0	HMMPfam_Ricin_B_lectin,HMMSmart_RICIN,superfamily_RicinB_like	HMMPfam_Ricin_B_lectin,HMMSmart_RICIN,HMMPfam_Glycos_transf_2,superfamily_RicinB_like,superfamily_SSF53448	0	no_errors	MOC22	241	0	0	113	108	48.65	174	1	0.57	291	0	0
2	66039233	66039233	T	A	SNP	Ttc21b	NM_001047604.1	mouse	genbank	58_37k	-1	validated	silent	c.3207	p.P1069	0	superfamily_TPR-like	HMMPfam_TPR_1,HMMPfam_TPR_4,HMMSmart_SM00028,superfamily_TPR-like	0	no_errors	MOC23	219	0	0	183	0	0	93	54	36.73	212	1	0.47
2	66048096	66048096	T	A	SNP	Ttc21b	NM_001047604.1	mouse	genbank	58_37k	-1	validated	missense	c.2707	p.I903F	0	HMMPfam_TPR_1,HMMSmart_SM00028,superfamily_TPR-like	HMMPfam_TPR_1,HMMPfam_TPR_4,HMMSmart_SM00028,superfamily_TPR-like	0	no_errors	MOC22	47	0	0	22	19	46.34	28	0	0	46	0	0
2	66060748	66060748	T	A	SNP	Ttc21b	NM_001047604.1	mouse	genbank	58_37k	-1	validated	silent	c.2421	p.A807	0	HMMSmart_SM00028,superfamily_TPR-like	HMMPfam_TPR_1,HMMPfam_TPR_4,HMMSmart_SM00028,superfamily_TPR-like	0	no_errors	MOC23	91	0	0	96	0	0	28	41	59.42	90	0	0
2	66110963	66110963	A	T	SNP	Scn1a	NM_018733.2	mouse	genbank	58_37k	-1	validated	missense	c.5976	p.D1992E	0	NULL	HMMPfam_IQ,HMMSmart_IQ,HMMPfam_Ion_trans,HMMPfam_Na_trans_assoc,PatternScan_RIBONUCLEASE_P,superfamily_SSF81324	0	no_errors	MOC23	89	0	0	104	0	0	59	41	41	94	1	1.04
2	66111162	66111162	T	A	SNP	Scn1a	NM_018733.2	mouse	genbank	58_37k	-1	validated	missense	c.5777	p.Q1926L	0	NULL	HMMPfam_IQ,HMMSmart_IQ,HMMPfam_Ion_trans,HMMPfam_Na_trans_assoc,PatternScan_RIBONUCLEASE_P,superfamily_SSF81324	0	no_errors	MOC23	150	0	0	208	0	0	77	60	43.8	168	0	0
2	66125830	66125830	T	A	SNP	Scn1a	NM_018733.2	mouse	genbank	58_37k	-1	validated	missense	c.4255	p.T1419S	0	HMMPfam_Ion_trans,superfamily_SSF81324	HMMPfam_IQ,HMMSmart_IQ,HMMPfam_Ion_trans,HMMPfam_Na_trans_assoc,PatternScan_RIBONUCLEASE_P,superfamily_SSF81324	0	no_errors	MOC22	59	0	0	33	13	28.26	57	1	1.72	50	0	0
2	66137819	66137819	C	G	SNP	Scn1a	NM_018733.2	mouse	genbank	58_37k	-1	validated	silent	c.3708	p.T1236	0	superfamily_SSF81324	HMMPfam_IQ,HMMSmart_IQ,HMMPfam_Ion_trans,HMMPfam_Na_trans_assoc,PatternScan_RIBONUCLEASE_P,superfamily_SSF81324	0	no_errors	MOC22	146	0	0	72	77	51.68	125	1	0.79	182	0	0
2	66157680	66157680	A	T	SNP	Scn1a	NM_018733.2	mouse	genbank	58_37k	-1	validated	silent	c.2676	p.I892	0	HMMPfam_Ion_trans,superfamily_SSF81324	HMMPfam_IQ,HMMSmart_IQ,HMMPfam_Ion_trans,HMMPfam_Na_trans_assoc,PatternScan_RIBONUCLEASE_P,superfamily_SSF81324	0	no_errors	MOC23	121	0	0	117	0	0	54	53	49.53	131	0	0
2	66162878	66162878	A	G	SNP	Scn1a	NM_018733.2	mouse	genbank	58_37k	-1	validated	missense	c.1793	p.F598S	0	NULL	HMMPfam_IQ,HMMSmart_IQ,HMMPfam_Ion_trans,HMMPfam_Na_trans_assoc,PatternScan_RIBONUCLEASE_P,superfamily_SSF81324	0	no_errors	MOC22	363	0	0	212	214	50.23	333	3	0.89	544	2	0.37
2	66580069	66580069	A	T	SNP	Scn7a	NM_009135.2	mouse	genbank	58_37k	-1	validated	missense	c.614	p.M205K	0	HMMPfam_Ion_trans,superfamily_SSF81324	HMMSmart_IQ,HMMPfam_Ion_trans,HMMPfam_Na_trans_assoc,superfamily_SSF81324	0	no_errors	MOC23	61	0	0	61	0	0	21	31	59.62	57	0	0
2	67346379	67346379	A	T	SNP	Xirp2	NM_001024618.2	mouse	genbank	58_37k	1	provisional	silent	c.906	p.S302	0	NULL	HMMPfam_LIM,HMMSmart_SM00132,PatternScan_LIM_DOMAIN_1,PatternScan_SER_THR_PHOSPHATASE,HMMPfam_Xin,superfamily_Glucocorticoid receptor-like (DNA-binding domain)	0	no_errors	MOC23	69	0	0	93	0	0	36	24	40	78	0	0
2	67350637	67350637	C	A	SNP	Xirp2	NM_001024618.2	mouse	genbank	58_37k	1	provisional	missense	c.5164	p.P1722T	0	NULL	HMMPfam_LIM,HMMSmart_SM00132,PatternScan_LIM_DOMAIN_1,PatternScan_SER_THR_PHOSPHATASE,HMMPfam_Xin,superfamily_Glucocorticoid receptor-like (DNA-binding domain)	0	no_errors	MOC1	50	10	16.67	84	0	0	40	0	0	53	0	0
2	67351014	67351014	T	A	SNP	Xirp2	NM_001024618.2	mouse	genbank	58_37k	1	provisional	missense	c.5541	p.S1847R	0	NULL	HMMPfam_LIM,HMMSmart_SM00132,PatternScan_LIM_DOMAIN_1,PatternScan_SER_THR_PHOSPHATASE,HMMPfam_Xin,superfamily_Glucocorticoid receptor-like (DNA-binding domain)	0	no_errors	MOC1	75	45	37.5	122	0	0	86	0	0	160	0	0
2	67352734	67352734	A	C	SNP	Xirp2	NM_001024618.2	mouse	genbank	58_37k	1	provisional	missense	c.7261	p.K2421Q	0	NULL	HMMPfam_LIM,HMMSmart_SM00132,PatternScan_LIM_DOMAIN_1,PatternScan_SER_THR_PHOSPHATASE,HMMPfam_Xin,superfamily_Glucocorticoid receptor-like (DNA-binding domain)	0	no_errors	MOC23	86	0	0	96	0	0	51	33	39.29	97	0	0
2	68994474	68994474	A	T	SNP	Nostrin	NM_181547.3	mouse	genbank	58_37k	1	validated	missense	c.305	p.H102L	0	NULL	HMMPfam_FCH,HMMPfam_SH3_1,HMMSmart_SH3,superfamily_SH3	0	no_errors	MOC1	85	37	30.08	118	0	0	93	0	0	114	0	0
2	69123269	69123269	T	C	SNP	Abcb11	NM_021022.3	mouse	genbank	58_37k	-1	reviewed	missense	c.1807	p.K603E	0	HMMPfam_ABC_tran,HMMSmart_AAA,superfamily_SSF52540	HMMPfam_ABC_membrane,HMMPfam_ABC_tran,HMMSmart_AAA,superfamily_ABC_TM_1,PatternScan_ABC_TRANSPORTER_1,PatternScan_HOMEOBOX_1,superfamily_SSF52540	0	no_errors	MOC23	174	0	0	181	0	0	73	84	53.5	187	1	0.53
2	69123337	69123337	A	T	SNP	Abcb11	NM_021022.3	mouse	genbank	58_37k	-1	reviewed	missense	c.1739	p.L580Q	0	HMMPfam_ABC_tran,HMMSmart_AAA,superfamily_SSF52540	HMMPfam_ABC_membrane,HMMPfam_ABC_tran,HMMSmart_AAA,superfamily_ABC_TM_1,PatternScan_ABC_TRANSPORTER_1,PatternScan_HOMEOBOX_1,superfamily_SSF52540	0	no_errors	MOC22	159	0	0	77	77	50	154	0	0	174	1	0.57
2	69127430	69127430	T	A	SNP	Abcb11	NM_021022.3	mouse	genbank	58_37k	-1	reviewed	missense	c.1301	p.E434V	0	superfamily_ABC_TM_1,superfamily_SSF52540	HMMPfam_ABC_membrane,HMMPfam_ABC_tran,HMMSmart_AAA,superfamily_ABC_TM_1,PatternScan_ABC_TRANSPORTER_1,PatternScan_HOMEOBOX_1,superfamily_SSF52540	0	no_errors	MOC1	166	120	41.96	296	0	0	233	0	0	293	0	0
2	69269191	69269191	T	A	SNP	Lrp2	NM_001081088.1	mouse	genbank	58_37k	-1	provisional	missense	c.13462	p.M4488L	0	NULL	HMMPfam_Ldl_recept_b,HMMSmart_LY,PatternScan_ASX_HYDROXYL,HMMSmart_EGF_CA,HMMPfam_Ldl_recept_a,HMMSmart_LDLa,PatternScan_LDLRA_1,superfamily_LDL_rcpt_classA_cys-rich,HMMPfam_EGF,HMMSmart_EGF,PatternScan_EGF_1,PatternScan_EGF_2,HMMPfam_EGF_CA,PatternScan_EGF_CA,superfamily_SSF57196,superfamily_SSF63825	0	no_errors	MOC1	93	53	36.3	157	0	0	130	0	0	175	0	0
2	69303704	69303704	T	G	SNP	Lrp2	NM_001081088.1	mouse	genbank	58_37k	-1	provisional	missense	c.10117	p.T3373P	0	HMMPfam_Ldl_recept_b,HMMSmart_LY,superfamily_SSF63825	HMMPfam_Ldl_recept_b,HMMSmart_LY,PatternScan_ASX_HYDROXYL,HMMSmart_EGF_CA,HMMPfam_Ldl_recept_a,HMMSmart_LDLa,PatternScan_LDLRA_1,superfamily_LDL_rcpt_classA_cys-rich,HMMPfam_EGF,HMMSmart_EGF,PatternScan_EGF_1,PatternScan_EGF_2,HMMPfam_EGF_CA,PatternScan_EGF_CA,superfamily_SSF57196,superfamily_SSF63825	0	no_errors	MOC22	160	0	0	83	69	45.39	130	1	0.76	175	0	0
2	69365687	69365687	G	T	SNP	Lrp2	NM_001081088.1	mouse	genbank	58_37k	-1	provisional	missense	c.1054	p.Q352K	0	HMMSmart_EGF,superfamily_SSF57196	HMMPfam_Ldl_recept_b,HMMSmart_LY,PatternScan_ASX_HYDROXYL,HMMSmart_EGF_CA,HMMPfam_Ldl_recept_a,HMMSmart_LDLa,PatternScan_LDLRA_1,superfamily_LDL_rcpt_classA_cys-rich,HMMPfam_EGF,HMMSmart_EGF,PatternScan_EGF_1,PatternScan_EGF_2,HMMPfam_EGF_CA,PatternScan_EGF_CA,superfamily_SSF57196,superfamily_SSF63825	0	no_errors	MOC23	45	0	0	47	0	0	16	19	54.29	47	0	0
2	69505220	69505220	G	T	SNP	Bbs5	ENSMUST00000127806	mouse	ensembl	58_37k	1	known	nonsense	c.235	p.G79*	0	HMMPfam_DUF1448	HMMPfam_DUF1448	0	pseudogene:no_stop_codon:bad_bp_length_for_coding_region	MOC23	165	0	0	129	0	0	57	69	54.76	145	0	0
2	69851195	69851195	A	T	SNP	Ubr3	ENSMUST00000055758	mouse	ensembl	58_37k	1	known	missense	c.4712	p.Q1571L	0	NULL	HMMPfam_zf-UBR,HMMSmart_SM00396,HMMPfam_zf-C3HC4,superfamily_RING/U-box	0	no_errors	MOC23	29	0	0	26	0	0	10	13	56.52	14	0	0
2	70094569	70094569	T	A	SNP	Myo3b	NM_177376.4	mouse	genbank	58_37k	1	validated	missense	c.2503	p.C835S	0	HMMPfam_Myosin_head,HMMSmart_SM00242,superfamily_P-loop containing nucleoside triphosphate hydrolases	HMMPfam_IQ,HMMSmart_SM00015,HMMSmart_SM00219,HMMPfam_Myosin_head,HMMSmart_SM00242,HMMSmart_SM00220,PatternScan_PROTEIN_KINASE_ST,superfamily_Protein kinase-like (PK-like),PatternScan_PROTEIN_KINASE_ATP,HMMPfam_Pkinase,superfamily_P-loop containing nucleoside triphosphate hydrolases	0	no_errors	MOC22	150	0	0	85	90	51.43	134	0	0	148	0	0
2	70297447	70297447	T	G	SNP	ENSMUSG00000047965	ENSMUST00000061905	mouse	ensembl	58_37k	1	known	missense	c.409	p.S137A	0	HMMPfam_Ribosomal_L6,superfamily_Ribosomal protein L6	PatternScan_RIBOSOMAL_L6_2,HMMPfam_Ribosomal_L6,superfamily_Ribosomal protein L6	0	no_errors	MOC1	56	89	60.54	170	0	0	151	0	0	163	0	0
2	70456718	70456718	T	A	SNP	LOC100039766	XM_001473460.1	mouse	genbank	58_37k	-1	model	silent	c.1068	p.A356	0	HMMPfam_HMG14_17,HMMSmart_SM00527	HMMPfam_HMG14_17,HMMSmart_SM00527,PatternScan_HMG14_17	0	no_errors	MOC23	90	0	0	76	0	0	32	40	55.56	82	0	0
2	70563614	70563614	C	A	SNP	Tlk1	NM_172664.3	mouse	genbank	58_37k	-1	validated	silent	c.1113	p.A371	0	NULL	HMMSmart_SM00219,HMMSmart_SM00220,PatternScan_PROTEIN_KINASE_ST,superfamily_Protein kinase-like (PK-like),PatternScan_PROTEIN_KINASE_ATP,HMMPfam_Pkinase	0	no_errors	MOC1	77	144	65.16	252	0	0	200	2	0.99	207	0	0
2	70831560	70831560	T	A	SNP	Mettl8	NM_145524.3	mouse	genbank	58_37k	-1	reviewed	silent	c.66	p.R22	0	NULL	HMMPfam_Methyltransf_12,superfamily_S-adenosyl-L-methionine-dependent methyltransferases	0	no_errors	MOC22	89	0	0	42	52	55.32	72	0	0	76	0	0
2	70967807	70967807	C	A	SNP	Cybrd1	ENSMUST00000028403	mouse	ensembl	58_37k	1	known	silent	c.291	p.A97	0	HMMPfam_Cytochrom_B561,HMMSmart_SM00665	HMMPfam_Cytochrom_B561,HMMSmart_SM00665	0	no_errors	MOC23	118	0	0	127	0	0	49	46	48.42	123	1	0.81
2	71114717	71114717	T	C	SNP	Slc25a12	NM_172436.3	mouse	genbank	58_37k	-1	provisional	silent	c.1725	p.A575	0	superfamily_Mitochondrial carrier,HMMPfam_Mito_carr	superfamily_Mitochondrial carrier,HMMSmart_SM00054,HMMPfam_Mito_carr,PatternScan_EF_HAND_1,superfamily_EF-hand	0	no_errors	MOC23	162	0	0	165	0	0	76	55	41.98	185	0	0
2	71258662	71258662	A	T	SNP	Hat1	NM_026115.4	mouse	genbank	58_37k	1	provisional	nonsense	c.496	p.R166*	0	superfamily_Acyl_CoA_acyltransferase,HMMPfam_Hat1_N	superfamily_Acyl_CoA_acyltransferase,HMMPfam_Hat1_N	0	no_errors	MOC23	229	0	0	234	1	0.43	100	96	48.98	170	2	1.16
2	72808600	72808600	T	A	SNP	Sp3	NM_001018042.3	mouse	genbank	58_37k	-1	reviewed	silent	c.1257	p.T419	0	NULL	HMMPfam_zf-C2H2,PatternScan_ZINC_FINGER_C2H2_1,HMMSmart_SM00355,superfamily_C2H2 and C2HC zinc fingers	0	no_errors	MOC22	121	0	0	79	55	39.57	109	0	0	110	1	0.89
2	73112334	73112334	T	A	SNP	Sp9	NM_001005343.2	mouse	genbank	58_37k	1	validated	missense	c.1174	p.F392I	0	HMMPfam_zf-C2H2,HMMSmart_ZnF_C2H2,superfamily_SSF57667	HMMPfam_zf-C2H2,PatternScan_ZINC_FINGER_C2H2_1,HMMSmart_ZnF_C2H2,superfamily_SSF57667	0	no_errors	MOC22	77	0	0	35	30	46.15	70	0	0	88	0	0
2	73517729	73517729	C	G	SNP	Chn1	ENSMUST00000112024	mouse	ensembl	58_37k	-1	known	silent	c.492	p.L164	0	NULL	HMMPfam_RhoGAP,HMMSmart_SM00324,HMMPfam_SH2,HMMSmart_SM00252,HMMPfam_C1_1,HMMSmart_SM00109,PatternScan_ZF_DAG_PE_1,superfamily_GTPase activation domain GAP,superfamily_SH2 domain,superfamily_Cysteine-rich domain	0	no_errors	MOC22	355	0	0	172	160	48.19	300	0	0	416	2	0.48
2	73798279	73798279	G	T	SNP	LOC667729	XR_031598.1	mouse	genbank	58_37k	-1	model	rna	NULL	NULL	0	0	0	0	pseudogene	MOC23	156	0	0	170	1	0.58	95	65	40.62	197	1	0.51
2	74601530	74601530	G	T	SNP	Hoxd1	NM_010467.2	mouse	genbank	58_37k	1	validated	silent	c.372	p.A124	0	NULL	HMMPfam_Homeobox,HMMSmart_HOX,superfamily_Homeodomain_like,PatternScan_HOMEOBOX_1	0	no_errors	MOC23	34	0	0	21	0	0	14	7	33.33	27	0	0
2	75860841	75860841	A	G	SNP	Pde11a	NM_001081033.1	mouse	genbank	58_37k	-1	provisional	missense	c.2489	p.V830A	0	HMMPfam_PDEase_I,HMMSmart_HDc,superfamily_SSF109604	HMMPfam_PDEase_I,PatternScan_PDEASE_I,HMMPfam_GAF,HMMSmart_GAF,HMMSmart_HDc,superfamily_SSF109604,superfamily_SSF55781	0	no_errors	MOC22	128	0	0	71	31	30.39	102	0	0	116	0	0
2	76032954	76032954	A	T	SNP	Pde11a	ENSMUST00000144892	mouse	ensembl	58_37k	-1	known	missense	c.275	p.L92Q	0	HMMPfam_GAF,HMMSmart_SM00065,superfamily_GAF domain-like	HMMPfam_PDEase_I,PatternScan_PDEASE_I,HMMPfam_GAF,HMMSmart_SM00065,HMMSmart_SM00471,superfamily_HD-domain/PDEase-like,superfamily_GAF domain-like	0	pseudogene:no_stop_codon:bad_bp_length_for_coding_region	MOC1	121	82	40.39	258	0	0	182	0	0	257	0	0
2	76428447	76428447	C	A	SNP	Osbpl6	NM_145525.2	mouse	genbank	58_37k	1	provisional	missense	c.2332	p.H778N	0	HMMPfam_Oxysterol_BP	HMMPfam_Oxysterol_BP,HMMPfam_PH,HMMSmart_SM00233,PatternScan_OSBP,superfamily_PH domain-like	0	no_errors	MOC23	128	0	0	115	0	0	41	45	52.33	114	0	0
2	76548782	76548782	G	T	SNP	Ttn	NM_011652.3	mouse	genbank	58_37k	-1	validated	silent	c.96678	p.A32226	0	NULL	HMMSmart_SM00219,HMMSmart_SM00220,PatternScan_IG_MHC,HMMSmart_SM00406,HMMSmart_SM00408,HMMSmart_SM00409,HMMSmart_SM00060,PatternScan_PROTEIN_KINASE_TYR,PatternScan_FGGY_KINASES_1,PatternScan_PEROXIDASE_1	0	no_errors	MOC23	89	0	0	93	0	0	47	28	37.33	116	0	0
2	76553487	76553487	A	T	SNP	Ttn	NM_011652.3	mouse	genbank	58_37k	-1	validated	silent	c.92310	p.T30770	0	HMMSmart_SM00060	HMMSmart_SM00219,HMMSmart_SM00220,PatternScan_IG_MHC,HMMSmart_SM00406,HMMSmart_SM00408,HMMSmart_SM00409,HMMSmart_SM00060,PatternScan_PROTEIN_KINASE_TYR,PatternScan_FGGY_KINASES_1,PatternScan_PEROXIDASE_1	0	no_errors	MOC22	34	0	0	16	18	52.94	32	0	0	41	0	0
2	76563127	76563127	T	A	SNP	Ttn	NM_011652.3	mouse	genbank	58_37k	-1	validated	silent	c.86352	p.P28784	0	HMMSmart_SM00060	HMMSmart_SM00219,HMMSmart_SM00220,PatternScan_IG_MHC,HMMSmart_SM00406,HMMSmart_SM00408,HMMSmart_SM00409,HMMSmart_SM00060,PatternScan_PROTEIN_KINASE_TYR,PatternScan_FGGY_KINASES_1,PatternScan_PEROXIDASE_1	0	no_errors	MOC22	122	0	0	45	38	45.78	86	1	1.15	130	0	0
2	76572749	76572749	A	G	SNP	Ttn	NM_011652.3	mouse	genbank	58_37k	-1	validated	missense	c.79952	p.L26651P	0	HMMSmart_SM00060	HMMSmart_SM00219,HMMSmart_SM00220,PatternScan_IG_MHC,HMMSmart_SM00406,HMMSmart_SM00408,HMMSmart_SM00409,HMMSmart_SM00060,PatternScan_PROTEIN_KINASE_TYR,PatternScan_FGGY_KINASES_1,PatternScan_PEROXIDASE_1	0	no_errors	MOC23	227	0	0	249	0	0	84	115	57.79	243	0	0
2	76574553	76574553	T	G	SNP	Ttn	NM_011652.3	mouse	genbank	58_37k	-1	validated	missense	c.78814	p.T26272P	0	HMMSmart_SM00408,HMMSmart_SM00409	HMMSmart_SM00219,HMMSmart_SM00220,PatternScan_IG_MHC,HMMSmart_SM00406,HMMSmart_SM00408,HMMSmart_SM00409,HMMSmart_SM00060,PatternScan_PROTEIN_KINASE_TYR,PatternScan_FGGY_KINASES_1,PatternScan_PEROXIDASE_1	0	no_errors	MOC1	52	31	37.35	126	0	0	86	0	0	124	0	0
2	76575901	76575901	C	G	SNP	Ttn	NM_011652.3	mouse	genbank	58_37k	-1	validated	silent	c.77466	p.T25822	0	NULL	HMMSmart_SM00219,HMMSmart_SM00220,PatternScan_IG_MHC,HMMSmart_SM00406,HMMSmart_SM00408,HMMSmart_SM00409,HMMSmart_SM00060,PatternScan_PROTEIN_KINASE_TYR,PatternScan_FGGY_KINASES_1,PatternScan_PEROXIDASE_1	0	no_errors	MOC22	124	0	0	89	73	45.06	128	1	0.78	156	0	0
2	76579886	76579886	T	A	SNP	Ttn	NM_011652.3	mouse	genbank	58_37k	-1	validated	missense	c.73481	p.N24494I	0	HMMSmart_SM00060	HMMSmart_SM00219,HMMSmart_SM00220,PatternScan_IG_MHC,HMMSmart_SM00406,HMMSmart_SM00408,HMMSmart_SM00409,HMMSmart_SM00060,PatternScan_PROTEIN_KINASE_TYR,PatternScan_FGGY_KINASES_1,PatternScan_PEROXIDASE_1	0	no_errors	MOC23	341	0	0	322	0	0	169	131	43.67	397	1	0.25
2	76580920	76580920	A	T	SNP	Ttn	NM_011652.3	mouse	genbank	58_37k	-1	validated	silent	c.72447	p.A24149	0	HMMSmart_SM00409	HMMSmart_SM00219,HMMSmart_SM00220,PatternScan_IG_MHC,HMMSmart_SM00406,HMMSmart_SM00408,HMMSmart_SM00409,HMMSmart_SM00060,PatternScan_PROTEIN_KINASE_TYR,PatternScan_FGGY_KINASES_1,PatternScan_PEROXIDASE_1	0	no_errors	MOC22	83	1	1.19	59	37	38.54	93	0	0	97	1	1.02
2	76589596	76589596	T	A	SNP	Ttn	NM_011652.3	mouse	genbank	58_37k	-1	validated	silent	c.63771	p.I21257	0	HMMSmart_SM00060	HMMSmart_SM00219,HMMSmart_SM00220,PatternScan_IG_MHC,HMMSmart_SM00406,HMMSmart_SM00408,HMMSmart_SM00409,HMMSmart_SM00060,PatternScan_PROTEIN_KINASE_TYR,PatternScan_FGGY_KINASES_1,PatternScan_PEROXIDASE_1	0	no_errors	MOC1	147	96	39.51	287	0	0	207	0	0	329	0	0
2	76599391	76599391	A	T	SNP	Ttn	NM_011652.3	mouse	genbank	58_37k	-1	validated	missense	c.57752	p.L19251H	0	HMMSmart_SM00060	HMMSmart_SM00219,HMMSmart_SM00220,PatternScan_IG_MHC,HMMSmart_SM00406,HMMSmart_SM00408,HMMSmart_SM00409,HMMSmart_SM00060,PatternScan_PROTEIN_KINASE_TYR,PatternScan_FGGY_KINASES_1,PatternScan_PEROXIDASE_1	0	no_errors	MOC1	72	41	36.28	120	0	0	110	0	0	121	0	0
2	76610626	76610626	T	A	SNP	Ttn	NM_011652.3	mouse	genbank	58_37k	-1	validated	silent	c.50070	p.P16690	0	HMMSmart_SM00060	HMMSmart_SM00219,HMMSmart_SM00220,PatternScan_IG_MHC,HMMSmart_SM00406,HMMSmart_SM00408,HMMSmart_SM00409,HMMSmart_SM00060,PatternScan_PROTEIN_KINASE_TYR,PatternScan_FGGY_KINASES_1,PatternScan_PEROXIDASE_1	0	no_errors	MOC1	40	28	41.18	90	0	0	58	0	0	71	0	0
2	76618944	76618944	A	T	SNP	Ttn	NM_011652.3	mouse	genbank	58_37k	-1	validated	missense	c.47062	p.W15688R	0	HMMSmart_SM00060	HMMSmart_SM00219,HMMSmart_SM00220,PatternScan_IG_MHC,HMMSmart_SM00406,HMMSmart_SM00408,HMMSmart_SM00409,HMMSmart_SM00060,PatternScan_PROTEIN_KINASE_TYR,PatternScan_FGGY_KINASES_1,PatternScan_PEROXIDASE_1	0	no_errors	MOC23	260	0	0	291	0	0	145	113	43.8	322	0	0
2	76620238	76620238	A	T	SNP	LOC100048589	XM_001480262.1	mouse	genbank	58_37k	1	model	silent	c.51	p.G17	0	NULL	NULL	0	pseudogene:no_stop_codon	MOC22	119	0	0	67	55	45.08	109	0	0	129	0	0
2	76622581	76622581	T	A	SNP	Ttn	NM_011652.3	mouse	genbank	58_37k	-1	validated	missense	c.45509	p.E15170V	0	HMMSmart_SM00408,HMMSmart_SM00409	HMMSmart_SM00219,HMMSmart_SM00220,PatternScan_IG_MHC,HMMSmart_SM00406,HMMSmart_SM00408,HMMSmart_SM00409,HMMSmart_SM00060,PatternScan_PROTEIN_KINASE_TYR,PatternScan_FGGY_KINASES_1,PatternScan_PEROXIDASE_1	0	no_errors	MOC22	164	0	0	78	80	50.63	129	0	0	192	0	0
2	76624320	76624320	T	C	SNP	Ttn	NM_011652.3	mouse	genbank	58_37k	-1	validated	missense	c.44407	p.K14803E	0	HMMSmart_SM00408,HMMSmart_SM00409	HMMSmart_SM00219,HMMSmart_SM00220,PatternScan_IG_MHC,HMMSmart_SM00406,HMMSmart_SM00408,HMMSmart_SM00409,HMMSmart_SM00060,PatternScan_PROTEIN_KINASE_TYR,PatternScan_FGGY_KINASES_1,PatternScan_PEROXIDASE_1	0	no_errors	MOC23	131	0	0	156	0	0	52	60	53.1	173	1	0.57
2	76638612	76638612	T	A	SNP	Ttn	NM_011652.3	mouse	genbank	58_37k	-1	validated	silent	c.37266	p.P12422	0	NULL	HMMSmart_SM00219,HMMSmart_SM00220,PatternScan_IG_MHC,HMMSmart_SM00406,HMMSmart_SM00408,HMMSmart_SM00409,HMMSmart_SM00060,PatternScan_PROTEIN_KINASE_TYR,PatternScan_FGGY_KINASES_1,PatternScan_PEROXIDASE_1	0	no_errors	MOC22	26	0	0	15	22	59.46	29	0	0	28	0	0
2	76640328	76640328	A	C	SNP	Ttn	NM_011652.3	mouse	genbank	58_37k	-1	validated	missense	c.37200	p.D12400E	0	HMMSmart_SM00408,HMMSmart_SM00409	HMMSmart_SM00219,HMMSmart_SM00220,PatternScan_IG_MHC,HMMSmart_SM00406,HMMSmart_SM00408,HMMSmart_SM00409,HMMSmart_SM00060,PatternScan_PROTEIN_KINASE_TYR,PatternScan_FGGY_KINASES_1,PatternScan_PEROXIDASE_1	0	no_errors	MOC23	279	0	0	260	0	0	147	92	38.33	304	0	0
2	76640543	76640543	C	A	SNP	Ttn	NM_011652.3	mouse	genbank	58_37k	-1	validated	nonsense	c.36985	p.E12329*	0	NULL	HMMSmart_SM00219,HMMSmart_SM00220,PatternScan_IG_MHC,HMMSmart_SM00406,HMMSmart_SM00408,HMMSmart_SM00409,HMMSmart_SM00060,PatternScan_PROTEIN_KINASE_TYR,PatternScan_FGGY_KINASES_1,PatternScan_PEROXIDASE_1	0	no_errors	MOC22	82	0	0	43	35	44.87	84	1	1.18	98	0	0
2	76640544	76640544	A	T	SNP	Ttn	NM_011652.3	mouse	genbank	58_37k	-1	validated	silent	c.36984	p.V12328	0	NULL	HMMSmart_SM00219,HMMSmart_SM00220,PatternScan_IG_MHC,HMMSmart_SM00406,HMMSmart_SM00408,HMMSmart_SM00409,HMMSmart_SM00060,PatternScan_PROTEIN_KINASE_TYR,PatternScan_FGGY_KINASES_1,PatternScan_PEROXIDASE_1	0	no_errors	MOC22	81	0	0	42	35	45.45	85	1	1.16	98	0	0
2	76652650	76652650	C	A	SNP	Ttn	NM_011652.3	mouse	genbank	58_37k	-1	validated	missense	c.33679	p.D11227Y	0	HMMSmart_SM00408,HMMSmart_SM00409	HMMSmart_SM00219,HMMSmart_SM00220,PatternScan_IG_MHC,HMMSmart_SM00406,HMMSmart_SM00408,HMMSmart_SM00409,HMMSmart_SM00060,PatternScan_PROTEIN_KINASE_TYR,PatternScan_FGGY_KINASES_1,PatternScan_PEROXIDASE_1	0	no_errors	MOC23	57	0	0	87	0	0	39	20	33.9	68	0	0
2	76692246	76692246	T	A	SNP	Ttn	NM_011652.3	mouse	genbank	58_37k	-1	validated	nonsense	c.28651	p.K9551*	0	NULL	HMMSmart_SM00219,HMMSmart_SM00220,PatternScan_IG_MHC,HMMSmart_SM00406,HMMSmart_SM00408,HMMSmart_SM00409,HMMSmart_SM00060,PatternScan_PROTEIN_KINASE_TYR,PatternScan_FGGY_KINASES_1,PatternScan_PEROXIDASE_1	0	no_errors	MOC1	34	78	69.64	118	0	0	92	0	0	86	0	0
2	76701456	76701456	T	A	SNP	Ttn	NM_011652.3	mouse	genbank	58_37k	-1	validated	missense	c.27338	p.E9113V	0	NULL	HMMSmart_SM00219,HMMSmart_SM00220,PatternScan_IG_MHC,HMMSmart_SM00406,HMMSmart_SM00408,HMMSmart_SM00409,HMMSmart_SM00060,PatternScan_PROTEIN_KINASE_TYR,PatternScan_FGGY_KINASES_1,PatternScan_PEROXIDASE_1	0	no_errors	MOC23	478	0	0	457	1	0.22	140	194	58.08	467	0	0
2	76701563	76701563	T	A	SNP	Ttn	NM_011652.3	mouse	genbank	58_37k	-1	validated	missense	c.27231	p.E9077D	0	NULL	HMMSmart_SM00219,HMMSmart_SM00220,PatternScan_IG_MHC,HMMSmart_SM00406,HMMSmart_SM00408,HMMSmart_SM00409,HMMSmart_SM00060,PatternScan_PROTEIN_KINASE_TYR,PatternScan_FGGY_KINASES_1,PatternScan_PEROXIDASE_1	0	no_errors	MOC22	324	0	0	0	276	100	237	2	0.84	335	1	0.3
2	76706457	76706457	A	G	SNP	Ttn	NM_011652.3	mouse	genbank	58_37k	-1	validated	missense	c.26570	p.I8857T	0	HMMSmart_SM00408,HMMSmart_SM00409	HMMSmart_SM00219,HMMSmart_SM00220,PatternScan_IG_MHC,HMMSmart_SM00406,HMMSmart_SM00408,HMMSmart_SM00409,HMMSmart_SM00060,PatternScan_PROTEIN_KINASE_TYR,PatternScan_FGGY_KINASES_1,PatternScan_PEROXIDASE_1	0	no_errors	MOC23	229	0	0	221	0	0	115	84	42.21	306	0	0
2	76733836	76733836	C	A	SNP	Ttn	NM_011652.3	mouse	genbank	58_37k	-1	validated	missense	c.15466	p.V5156F	0	HMMSmart_SM00409	HMMSmart_SM00219,HMMSmart_SM00220,PatternScan_IG_MHC,HMMSmart_SM00406,HMMSmart_SM00408,HMMSmart_SM00409,HMMSmart_SM00060,PatternScan_PROTEIN_KINASE_TYR,PatternScan_FGGY_KINASES_1,PatternScan_PEROXIDASE_1	0	no_errors	MOC23	138	1	0.72	121	0	0	70	38	35.19	120	0	0
2	76734563	76734563	A	T	SNP	Ttn	NM_011652.3	mouse	genbank	58_37k	-1	validated	missense	c.14968	p.F4990I	0	HMMSmart_SM00406,HMMSmart_SM00408,HMMSmart_SM00409	HMMSmart_SM00219,HMMSmart_SM00220,PatternScan_IG_MHC,HMMSmart_SM00406,HMMSmart_SM00408,HMMSmart_SM00409,HMMSmart_SM00060,PatternScan_PROTEIN_KINASE_TYR,PatternScan_FGGY_KINASES_1,PatternScan_PEROXIDASE_1	0	no_errors	MOC1	77	66	46.15	131	0	0	117	0	0	127	0	0
2	76735442	76735442	A	T	SNP	Ttn	NM_011652.3	mouse	genbank	58_37k	-1	validated	missense	c.14330	p.V4777E	0	NULL	HMMSmart_SM00219,HMMSmart_SM00220,PatternScan_IG_MHC,HMMSmart_SM00406,HMMSmart_SM00408,HMMSmart_SM00409,HMMSmart_SM00060,PatternScan_PROTEIN_KINASE_TYR,PatternScan_FGGY_KINASES_1,PatternScan_PEROXIDASE_1	0	no_errors	MOC23	89	0	0	109	0	0	27	39	59.09	101	1	0.98
2	76745616	76745616	A	T	SNP	Ttn	NM_028004.2	mouse	genbank	58_37k	-1	validated	missense	c.12635	p.V4212E	0	HMMSmart_SM00409	HMMSmart_SM00219,HMMSmart_SM00220,PatternScan_IG_MHC,HMMSmart_SM00406,HMMSmart_SM00408,HMMSmart_SM00409,HMMSmart_SM00060,PatternScan_PROTEIN_KINASE_TYR,PatternScan_FGGY_KINASES_1,PatternScan_PEROXIDASE_1	0	no_errors	MOC22	252	1	0.4	130	118	47.58	228	1	0.43	298	2	0.67
2	76754890	76754890	G	C	SNP	Ttn	ENSMUST00000099980	mouse	ensembl	58_37k	-1	known	missense	c.13871	p.S4624W	0	NULL	PatternScan_THIOL_PROTEASE_HIS,PatternScan_IG_MHC,HMMSmart_IGc2,HMMSmart_IG,HMMPfam_I-set,HMMPfam_Titin_Z,superfamily_SSF48726	0	no_errors	MOC1	67	96	58.9	198	0	0	158	0	0	189	0	0
2	76757197	76757197	A	T	SNP	Ttn	ENSMUST00000099980	mouse	ensembl	58_37k	-1	known	missense	c.11564	p.V3855E	0	NULL	PatternScan_THIOL_PROTEASE_HIS,PatternScan_IG_MHC,HMMSmart_IGc2,HMMSmart_IG,HMMPfam_I-set,HMMPfam_Titin_Z,superfamily_SSF48726	0	no_errors	MOC23	316	0	0	278	1	0.36	86	141	62.11	355	3	0.84
2	76757869	76757869	T	C	SNP	Ttn	ENSMUST00000099980	mouse	ensembl	58_37k	-1	known	missense	c.10892	p.Y3631C	0	NULL	PatternScan_THIOL_PROTEASE_HIS,PatternScan_IG_MHC,HMMSmart_IGc2,HMMSmart_IG,HMMPfam_I-set,HMMPfam_Titin_Z,superfamily_SSF48726	0	no_errors	MOC23	332	1	0.3	305	0	0	133	162	54.92	366	0	0
2	76781029	76781029	T	C	SNP	Ttn	NM_011652.3	mouse	genbank	58_37k	-1	validated	missense	c.7223	p.H2408R	0	HMMSmart_SM00409	HMMSmart_SM00219,HMMSmart_SM00220,PatternScan_IG_MHC,HMMSmart_SM00406,HMMSmart_SM00408,HMMSmart_SM00409,HMMSmart_SM00060,PatternScan_PROTEIN_KINASE_TYR,PatternScan_FGGY_KINASES_1,PatternScan_PEROXIDASE_1	0	no_errors	MOC23	199	0	0	211	1	0.47	108	88	44.9	217	0	0
2	76781106	76781106	T	A	SNP	Ttn	NM_011652.3	mouse	genbank	58_37k	-1	validated	missense	c.7146	p.E2382D	0	HMMSmart_SM00409	HMMSmart_SM00219,HMMSmart_SM00220,PatternScan_IG_MHC,HMMSmart_SM00406,HMMSmart_SM00408,HMMSmart_SM00409,HMMSmart_SM00060,PatternScan_PROTEIN_KINASE_TYR,PatternScan_FGGY_KINASES_1,PatternScan_PEROXIDASE_1	0	no_errors	MOC22	230	0	0	3	249	98.81	193	0	0	204	1	0.49
2	76784984	76784984	A	T	SNP	Ttn	NM_011652.3	mouse	genbank	58_37k	-1	validated	missense	c.4268	p.M1423K	0	NULL	HMMSmart_SM00219,HMMSmart_SM00220,PatternScan_IG_MHC,HMMSmart_SM00406,HMMSmart_SM00408,HMMSmart_SM00409,HMMSmart_SM00060,PatternScan_PROTEIN_KINASE_TYR,PatternScan_FGGY_KINASES_1,PatternScan_PEROXIDASE_1	0	no_errors	MOC1	44	27	38.03	68	0	0	59	0	0	78	0	0
2	76790155	76790155	C	G	SNP	Ttn	NM_011652.3	mouse	genbank	58_37k	-1	validated	silent	c.2931	p.V977	0	HMMSmart_SM00406,HMMSmart_SM00408,HMMSmart_SM00409	HMMSmart_SM00219,HMMSmart_SM00220,PatternScan_IG_MHC,HMMSmart_SM00406,HMMSmart_SM00408,HMMSmart_SM00409,HMMSmart_SM00060,PatternScan_PROTEIN_KINASE_TYR,PatternScan_FGGY_KINASES_1,PatternScan_PEROXIDASE_1	0	no_errors	MOC1	29	55	65.48	82	0	0	76	0	0	94	0	0
2	76792705	76792705	T	A	SNP	Ttn	NM_011652.3	mouse	genbank	58_37k	-1	validated	missense	c.2434	p.T812S	0	NULL	HMMSmart_SM00219,HMMSmart_SM00220,PatternScan_IG_MHC,HMMSmart_SM00406,HMMSmart_SM00408,HMMSmart_SM00409,HMMSmart_SM00060,PatternScan_PROTEIN_KINASE_TYR,PatternScan_FGGY_KINASES_1,PatternScan_PEROXIDASE_1	0	no_errors	MOC22	66	0	0	44	38	46.34	60	0	0	60	0	0
2	77079760	77079760	C	A	SNP	Sestd1	NM_175465.5	mouse	genbank	58_37k	-1	validated	missense	c.74	p.S25I	0	NULL	HMMSmart_SPEC,superfamily_Spectrin	0	no_errors	MOC22	86	0	0	29	31	51.67	64	0	0	56	0	0
2	77079767	77079767	T	A	SNP	Sestd1	NM_175465.5	mouse	genbank	58_37k	-1	validated	nonsense	c.67	p.R23*	0	NULL	HMMSmart_SPEC,superfamily_Spectrin	0	no_errors	MOC23	82	0	0	56	0	0	20	43	68.25	56	0	0
2	77130511	77130511	G	T	SNP	LOC623706	XR_032511.1	mouse	genbank	58_37k	1	model	rna	NULL	NULL	0	0	0	0	pseudogene	MOC23	79	0	0	65	0	0	31	27	45	70	1	1.41
2	77253788	77253788	T	A	SNP	Zfp385b	NM_178723.6	mouse	genbank	58_37k	-1	validated	silent	c.951	p.T317	0	HMMSmart_SM00451,PatternScan_ZINC_FINGER_C2H2_1,HMMSmart_SM00355,superfamily_C2H2 and C2HC zinc fingers	HMMSmart_SM00451,PatternScan_ZINC_FINGER_C2H2_1,HMMSmart_SM00355,superfamily_C2H2 and C2HC zinc fingers	0	no_errors	MOC22	132	0	0	1	122	99.19	109	1	0.91	152	1	0.65
2	77557635	77557635	G	A	SNP	Zfp385b	NM_178723.6	mouse	genbank	58_37k	-1	validated	silent	c.162	p.D54	0	HMMSmart_SM00451,PatternScan_ZINC_FINGER_C2H2_1,HMMSmart_SM00355	HMMSmart_SM00451,PatternScan_ZINC_FINGER_C2H2_1,HMMSmart_SM00355,superfamily_C2H2 and C2HC zinc fingers	0	no_errors	MOC23	166	0	0	178	0	0	65	79	54.86	189	0	0
2	77734171	77734171	T	G	SNP	Cwc22	NM_030560.3	mouse	genbank	58_37k	-1	provisional	missense	c.2620	p.S874R	0	NULL	HMMPfam_MIF4G,HMMSmart_SM00543,HMMPfam_MA3,HMMSmart_SM00544,superfamily_ARM repeat	0	no_errors	MOC1	142	87	37.99	250	0	0	250	0	0	313	1	0.32
2	77742018	77742018	T	A	SNP	Cwc22	NM_030560.3	mouse	genbank	58_37k	-1	provisional	nonsense	c.1990	p.K664*	0	NULL	HMMPfam_MIF4G,HMMSmart_SM00543,HMMPfam_MA3,HMMSmart_SM00544,superfamily_ARM repeat	0	no_errors	MOC23	249	0	0	221	0	0	119	123	50.62	263	1	0.38
2	78141814	78141814	A	T	SNP	Gm14461	NM_177843.3	mouse	genbank	58_37k	1	predicted	splice_site	c.1-2	e1-2	0	0	0	0	no_errors	MOC1	13	23	63.89	39	0	0	39	0	0	45	0	0
2	79165321	79165321	A	G	SNP	Itga4	NM_010576.3	mouse	genbank	58_37k	1	validated	missense	c.2882	p.H961R	0	superfamily_SSF69179	HMMPfam_Integrin_alpha,HMMPfam_FG-GAP,HMMSmart_Int_alpha,HMMPfam_Integrin_alpha2,PatternScan_INTEGRIN_ALPHA,superfamily_SSF69179,superfamily_SSF69318	0	no_errors	MOC1	20	14	41.18	38	0	0	19	0	0	44	0	0
2	79498306	79498306	A	T	SNP	Ssfa2	NM_080558.4	mouse	genbank	58_37k	1	validated	missense	c.2575	p.M859L	0	NULL	NULL	0	no_errors	MOC22	273	0	0	148	114	43.51	220	1	0.45	306	1	0.33
2	79501112	79501112	A	C	SNP	Ssfa2	NM_080558.4	mouse	genbank	58_37k	1	validated	missense	c.3083	p.Q1028P	0	NULL	NULL	0	no_errors	MOC23	77	0	0	61	0	0	30	17	36.17	44	0	0
2	79550115	79550115	A	T	SNP	Ppp1r1c	NM_172420.3	mouse	genbank	58_37k	1	provisional	silent	c.141	p.P47	0	HMMPfam_DARPP-32	HMMPfam_DARPP-32	0	no_errors	MOC22	258	0	0	111	91	45.05	160	0	0	204	0	0
2	79968931	79968931	C	T	SNP	Pde1a	NM_016744.4	mouse	genbank	58_37k	-1	validated	missense	c.61	p.G21R	0	NULL	HMMPfam_PDEase_I,PatternScan_PDEASE_I,HMMSmart_HDc,HMMPfam_PDEase_I_N,superfamily_SSF109604	0	no_errors	MOC23	138	0	0	177	0	0	63	53	45.69	159	0	0
2	80157618	80157618	G	T	SNP	Dnajc10	NM_024181.2	mouse	genbank	58_37k	1	validated	silent	c.66	p.L22	0	NULL	PatternScan_ER_TARGET,HMMPfam_DnaJ,HMMSmart_DnaJ,superfamily_DnaJ_N,superfamily_Thiordxn-like_fd,HMMPfam_Thioredoxin,PatternScan_THIOREDOXIN_1	0	no_errors	MOC22	38	0	0	12	18	60	30	0	0	32	0	0
2	80180725	80180725	A	T	SNP	Dnajc10	NM_024181.2	mouse	genbank	58_37k	1	validated	nonsense	c.1402	p.K468*	0	superfamily_Thiordxn-like_fd,HMMPfam_Thioredoxin	PatternScan_ER_TARGET,HMMPfam_DnaJ,HMMSmart_DnaJ,superfamily_DnaJ_N,superfamily_Thiordxn-like_fd,HMMPfam_Thioredoxin,PatternScan_THIOREDOXIN_1	0	no_errors	MOC22	266	0	0	143	118	45.21	205	1	0.49	316	1	0.32
2	80496112	80496112	A	G	SNP	Nup35	NM_027091.3	mouse	genbank	58_37k	1	provisional	missense	c.613	p.N205D	0	HMMPfam_MPPN	HMMPfam_MPPN	0	no_errors	MOC23	78	0	0	59	1	1.67	28	29	50.88	67	0	0
2	80497463	80497463	A	T	SNP	Nup35	NM_027091.3	mouse	genbank	58_37k	1	provisional	missense	c.853	p.M285L	0	NULL	HMMPfam_MPPN	0	no_errors	MOC23	58	1	1.69	59	0	0	21	9	30	60	0	0
2	82097530	82097530	T	A	SNP	Zfp804a	NM_175513.3	mouse	genbank	58_37k	1	validated	silent	c.1545	p.P515	0	NULL	PatternScan_ZINC_FINGER_C2H2_1,HMMSmart_ZnF_C2H2	0	no_errors	MOC22	110	0	0	69	71	50.71	103	0	0	143	0	0
2	82097699	82097699	G	T	SNP	Zfp804a	NM_175513.3	mouse	genbank	58_37k	1	validated	missense	c.1714	p.D572Y	0	NULL	PatternScan_ZINC_FINGER_C2H2_1,HMMSmart_ZnF_C2H2	0	no_errors	MOC22	58	0	0	37	49	56.98	53	1	1.85	68	0	0
2	82830696	82830696	A	T	SNP	Fsip2	XM_141020.6	mouse	genbank	58_37k	1	model	missense	c.15076	p.T5026S	0	superfamily_Concanavalin A-like lectins/glucanases	superfamily_Concanavalin A-like lectins/glucanases	0	no_errors	MOC23	215	1	0.46	305	0	0	146	92	38.66	393	1	0.25
2	82833741	82833741	G	A	SNP	Fsip2	XM_141020.6	mouse	genbank	58_37k	1	model	missense	c.18121	p.G6041R	0	superfamily_Concanavalin A-like lectins/glucanases	superfamily_Concanavalin A-like lectins/glucanases	0	no_errors	MOC1	57	33	36.67	115	0	0	72	0	0	91	0	0
2	82838356	82838356	A	T	SNP	Fsip2	XM_141020.6	mouse	genbank	58_37k	1	model	missense	c.18800	p.Q6267L	0	superfamily_Concanavalin A-like lectins/glucanases	superfamily_Concanavalin A-like lectins/glucanases	0	no_errors	MOC23	72	0	0	68	0	0	39	36	48	72	0	0
2	82847656	82847656	A	T	SNP	Fsip2	XM_141020.6	mouse	genbank	58_37k	1	model	missense	c.19271	p.K6424I	0	NULL	superfamily_Concanavalin A-like lectins/glucanases	0	no_errors	MOC22	58	0	0	33	35	51.47	57	0	0	62	0	0
2	84188447	84188447	A	T	SNP	Calcrl	NM_018782.2	mouse	genbank	58_37k	-1	validated	nonsense	c.693	p.C231*	0	HMMPfam_7tm_2,superfamily_Family A G protein-coupled receptor-like	HMMPfam_7tm_2,HMMPfam_HRM,HMMSmart_SM00008,PatternScan_G_PROTEIN_RECEP_F2_1,PatternScan_G_PROTEIN_RECEP_F2_2,superfamily_Hormone receptor domain (HRM Pfam 02793),superfamily_Family A G protein-coupled receptor-like	0	no_errors	MOC22	145	0	0	86	75	46.58	96	0	0	137	0	0
2	84210235	84210235	T	A	SNP	Calcrl	NM_018782.2	mouse	genbank	58_37k	-1	validated	silent	c.357	p.T119	0	HMMPfam_HRM,HMMSmart_SM00008,superfamily_Hormone receptor domain (HRM Pfam 02793),superfamily_Family A G protein-coupled receptor-like	HMMPfam_7tm_2,HMMPfam_HRM,HMMSmart_SM00008,PatternScan_G_PROTEIN_RECEP_F2_1,PatternScan_G_PROTEIN_RECEP_F2_2,superfamily_Hormone receptor domain (HRM Pfam 02793),superfamily_Family A G protein-coupled receptor-like	0	no_errors	MOC22	285	0	0	140	138	49.46	217	0	0	291	0	0
2	84210565	84210565	T	A	SNP	Calcrl	NM_018782.2	mouse	genbank	58_37k	-1	validated	silent	c.291	p.S97	0	HMMPfam_HRM,HMMSmart_SM00008,superfamily_Hormone receptor domain (HRM Pfam 02793)	HMMPfam_7tm_2,HMMPfam_HRM,HMMSmart_SM00008,PatternScan_G_PROTEIN_RECEP_F2_1,PatternScan_G_PROTEIN_RECEP_F2_2,superfamily_Hormone receptor domain (HRM Pfam 02793),superfamily_Family A G protein-coupled receptor-like	0	no_errors	MOC22	124	0	0	38	55	59.14	75	0	0	86	0	0
2	84274408	84274408	A	G	SNP	Tfpi	NM_011576.1	mouse	genbank	58_37k	-1	validated	missense	c.823	p.C275R	0	HMMPfam_Kunitz_BPTI,HMMSmart_SM00131,superfamily_BPTI-like	HMMPfam_Kunitz_BPTI,HMMSmart_SM00131,PatternScan_BPTI_KUNITZ_1,superfamily_BPTI-like	0	no_errors	MOC23	190	0	0	187	0	0	63	80	55.94	159	0	0
2	84274558	84274558	A	T	SNP	Tfpi	NM_011576.1	mouse	genbank	58_37k	-1	validated	missense	c.673	p.C225S	0	HMMPfam_Kunitz_BPTI,HMMSmart_SM00131,superfamily_BPTI-like	HMMPfam_Kunitz_BPTI,HMMSmart_SM00131,PatternScan_BPTI_KUNITZ_1,superfamily_BPTI-like	0	no_errors	MOC22	42	1	2.33	26	16	38.1	37	0	0	32	0	0
2	84518817	84518817	A	T	SNP	Med19	NM_025885.3	mouse	genbank	58_37k	1	validated	silent	c.216	p.P72	0	HMMPfam_Med19	HMMPfam_Med19	0	no_errors	MOC23	110	0	0	95	0	0	54	39	41.94	122	0	0
2	84565941	84565941	C	A	SNP	Clp1	NM_133840.2	mouse	genbank	58_37k	-1	provisional	silent	c.351	p.V117	0	superfamily_P-loop containing nucleoside triphosphate hydrolases	HMMPfam_Clp1,superfamily_P-loop containing nucleoside triphosphate hydrolases	0	no_errors	MOC22	231	0	0	133	118	47.01	197	1	0.51	268	1	0.37
2	84610371	84610371	A	T	SNP	Serping1	NM_009776.3	mouse	genbank	58_37k	-1	validated	silent	c.783	p.A261	0	HMMPfam_Serpin,HMMSmart_SERPIN,superfamily_Prot_inh_serpin	HMMPfam_Serpin,HMMSmart_SERPIN,PatternScan_SERPIN,superfamily_Prot_inh_serpin	0	no_errors	MOC23	170	0	0	156	0	0	55	74	56.92	184	0	0
2	84613781	84613781	G	T	SNP	Serping1	NM_009776.3	mouse	genbank	58_37k	-1	validated	silent	c.72	p.P24	0	NULL	HMMPfam_Serpin,HMMSmart_SERPIN,PatternScan_SERPIN,superfamily_Prot_inh_serpin	0	no_errors	MOC22	93	0	0	35	39	52.7	71	0	0	72	0	0
2	84649308	84649308	T	A	SNP	Ube2l6	NM_019949.2	mouse	genbank	58_37k	1	validated	missense	c.454	p.S152T	0	NULL	HMMPfam_UQ_con,HMMSmart_UBCc,PatternScan_UBIQUITIN_CONJUGAT_1,superfamily_UBQ-conjugat/RWD-like	0	no_errors	MOC1	30	28	48.28	48	0	0	40	0	0	31	0	0
2	84795728	84795728	A	T	SNP	Slc43a3	NM_021398.2	mouse	genbank	58_37k	1	validated	missense	c.1249	p.S417C	0	HMMPfam_MFS_1,superfamily_MFS general substrate transporter	HMMPfam_MFS_1,superfamily_MFS general substrate transporter	0	no_errors	MOC1	60	96	61.54	212	0	0	184	1	0.54	242	0	0
2	84833240	84833240	T	G	SNP	Prg3	NM_016914.2	mouse	genbank	58_37k	1	provisional	missense	c.601	p.C201G	0	HMMPfam_Lectin_C,HMMSmart_SM00034,superfamily_C-type lectin-like,PatternScan_C_TYPE_LECTIN_1	HMMPfam_Lectin_C,HMMSmart_SM00034,superfamily_C-type lectin-like,PatternScan_C_TYPE_LECTIN_1	0	no_errors	MOC22	87	0	0	47	45	48.91	66	0	0	96	1	1.03
2	84902906	84902906	A	C	SNP	Tnks1bp1	NM_001081260.2	mouse	genbank	58_37k	1	validated	silent	c.3019	p.R1007	0	NULL	NULL	0	no_errors	MOC23	67	0	0	72	1	1.37	24	36	60	59	1	1.67
2	84910143	84910143	A	T	SNP	Tnks1bp1	NM_001081260.2	mouse	genbank	58_37k	1	validated	splice_site	c.4287-2	e6-2	0	0	0	0	no_errors	MOC23	227	0	0	191	2	1.03	63	81	55.48	189	0	0
2	84910838	84910838	A	T	SNP	Tnks1bp1	NM_001081260.2	mouse	genbank	58_37k	1	validated	silent	c.4731	p.P1577	0	NULL	NULL	0	no_errors	MOC22	106	0	0	58	61	51.26	110	3	2.65	124	0	0
2	84976941	84976941	T	A	SNP	Aplnr	NM_011784.3	mouse	genbank	58_37k	1	validated	missense	c.152	p.V51E	0	HMMPfam_7tm_1,superfamily_Family A G protein-coupled receptor-like	HMMPfam_7tm_1,PatternScan_G_PROTEIN_RECEP_F1_1,superfamily_Family A G protein-coupled receptor-like	0	no_errors	MOC1	49	57	53.77	133	0	0	98	0	0	146	0	0
2	85171641	85171641	T	C	SNP	Olfr987	NM_001011785.1	mouse	genbank	58_37k	-1	provisional	missense	c.413	p.Q138R	0	HMMPfam_7tm_1,superfamily_SSF81321	HMMPfam_7tm_1,PatternScan_G_PROTEIN_RECEP_F1_1,superfamily_SSF81321	0	no_errors	MOC22	115	0	0	61	68	52.31	112	0	0	110	0	0
2	85193489	85193489	A	T	SNP	Olfr988	NM_001011534.1	mouse	genbank	58_37k	-1	provisional	nonsense	c.593	p.L198*	0	HMMPfam_7tm_1,superfamily_SSF81321	HMMPfam_7tm_1,PatternScan_G_PROTEIN_RECEP_F1_1,superfamily_SSF81321	0	no_errors	MOC1	55	87	61.27	181	0	0	170	0	0	198	0	0
2	85254210	85254210	A	G	SNP	Olfr993	NM_146435.1	mouse	genbank	58_37k	-1	provisional	silent	c.825	p.S275	0	HMMPfam_7tm_1,superfamily_SSF81321	HMMPfam_7tm_1,PatternScan_G_PROTEIN_RECEP_F1_1,superfamily_SSF81321	0	no_errors	MOC22	236	0	0	123	133	51.95	241	0	0	286	0	0
2	85270594	85270594	G	A	SNP	Olfr994	NM_146433.1	mouse	genbank	58_37k	-1	provisional	missense	c.391	p.R131C	0	HMMPfam_7tm_1,superfamily_SSF81321	HMMPfam_7tm_1,PatternScan_G_PROTEIN_RECEP_F1_1,superfamily_SSF81321	0	no_errors	MOC22	135	0	0	71	86	54.78	116	0	0	131	0	0
2	85515281	85515281	A	T	SNP	Olfr1006	NM_146570.2	mouse	genbank	58_37k	-1	validated	missense	c.26	p.L9Q	0	superfamily_Family A G protein-coupled receptor-like	HMMPfam_7tm_1,PatternScan_G_PROTEIN_RECEP_F1_1,superfamily_Family A G protein-coupled receptor-like	0	no_errors	MOC23	89	0	0	116	0	0	28	58	67.44	116	0	0
2	85562352	85562352	C	A	SNP	Olfr1009	NM_146572.2	mouse	genbank	58_37k	1	validated	missense	c.789	p.S263R	0	HMMPfam_7tm_1,superfamily_Family A G protein-coupled receptor-like	HMMPfam_7tm_1,PatternScan_G_PROTEIN_RECEP_F1_1,superfamily_Family A G protein-coupled receptor-like	0	no_errors	MOC23	129	0	0	149	0	0	65	59	47.58	149	1	0.67
2	85593793	85593793	A	T	SNP	Olfr1010	NM_207149.2	mouse	genbank	58_37k	1	validated	missense	c.274	p.I92F	0	HMMPfam_7tm_1,superfamily_Family A G protein-coupled receptor-like	HMMPfam_7tm_1,superfamily_Family A G protein-coupled receptor-like	0	pseudogene:no_stop_codon:bad_bp_length_for_coding_region	MOC23	227	0	0	266	0	0	129	132	50.57	331	2	0.6
2	85594065	85594065	G	C	SNP	Olfr1010	NM_207149.2	mouse	genbank	58_37k	1	validated	silent	c.546	p.V182	0	NULL	HMMPfam_7tm_1,superfamily_Family A G protein-coupled receptor-like	0	pseudogene:no_stop_codon:bad_bp_length_for_coding_region	MOC22	247	0	0	139	117	45.7	263	3	1.13	367	1	0.27
2	85626037	85626037	A	C	SNP	Olfr1015	NM_146571.2	mouse	genbank	58_37k	1	validated	missense	c.368	p.H123P	0	HMMPfam_7tm_1,PatternScan_G_PROTEIN_RECEP_F1_1,superfamily_SSF81321	HMMPfam_7tm_1,PatternScan_G_PROTEIN_RECEP_F1_1,superfamily_SSF81321	0	no_errors	MOC23	147	0	0	144	0	0	62	66	51.56	175	0	0
2	85681482	85681482	A	G	SNP	Olfr1019	NM_147015.1	mouse	genbank	58_37k	-1	validated	silent	c.465	p.S155	0	HMMPfam_7tm_1,superfamily_Family A G protein-coupled receptor-like	HMMPfam_7tm_1,PatternScan_G_PROTEIN_RECEP_F1_1,superfamily_Family A G protein-coupled receptor-like	0	no_errors	MOC23	68	0	0	102	0	0	39	49	55.68	86	0	0
2	85744409	85744409	T	A	SNP	Olfr1024	NM_001005230.2	mouse	genbank	58_37k	-1	validated	silent	c.801	p.P267	0	HMMPfam_7tm_1,superfamily_SSF81321	HMMPfam_7tm_1,PatternScan_G_PROTEIN_RECEP_F1_1,superfamily_SSF81321	0	no_errors	MOC1	68	128	64.97	168	0	0	143	0	0	168	0	0
2	85758143	85758143	A	T	SNP	Olfr1025-ps1	ENSMUST00000077055	mouse	ensembl	58_37k	1	known	missense	c.60	p.Q20H	0	superfamily_SSF81321	HMMPfam_7tm_1,PatternScan_G_PROTEIN_RECEP_F1_1,PatternScan_LECTIN_LEGUME_ALPHA,superfamily_SSF81321	0	no_errors	MOC23	275	0	0	297	0	0	133	136	50.56	378	0	0
2	85758629	85758629	A	G	SNP	Olfr1025-ps1	ENSMUST00000077055	mouse	ensembl	58_37k	1	known	silent	c.546	p.P182	0	HMMPfam_7tm_1,superfamily_SSF81321	HMMPfam_7tm_1,PatternScan_G_PROTEIN_RECEP_F1_1,PatternScan_LECTIN_LEGUME_ALPHA,superfamily_SSF81321	0	no_errors	MOC22	272	0	0	175	165	48.25	269	1	0.37	401	1	0.25
2	85763510	85763510	T	A	SNP	Olfr1026	NM_146584.2	mouse	genbank	58_37k	1	validated	missense	c.84	p.F28L	0	superfamily_SSF81321	HMMPfam_7tm_1,PatternScan_G_PROTEIN_RECEP_F1_1,superfamily_SSF81321	0	no_errors	MOC23	204	0	0	195	0	0	80	71	47.02	232	0	0
2	85792007	85792007	A	T	SNP	Olfr1028	NM_001011774.2	mouse	genbank	58_37k	1	validated	silent	c.786	p.P262	0	HMMPfam_7tm_1,superfamily_SSF81321	HMMPfam_7tm_1,PatternScan_G_PROTEIN_RECEP_F1_1,superfamily_SSF81321	0	no_errors	MOC23	235	0	0	282	3	1.05	114	111	49.33	313	1	0.32
2	85816229	85816229	C	T	SNP	Olfr1029	NM_001011852.2	mouse	genbank	58_37k	1	validated	silent	c.828	p.V276	0	HMMPfam_7tm_1,superfamily_SSF81321	HMMPfam_7tm_1,PatternScan_G_PROTEIN_RECEP_F1_1,superfamily_SSF81321	0	no_errors	MOC1	105	81	43.55	207	0	0	184	0	0	261	0	0
2	85832106	85832106	T	A	SNP	Olfr1031	NM_001011759.2	mouse	genbank	58_37k	1	validated	missense	c.131	p.M44K	0	HMMPfam_7tm_1,superfamily_SSF81321	HMMPfam_7tm_1,PatternScan_G_PROTEIN_RECEP_F1_1,superfamily_SSF81321	0	no_errors	MOC22	124	0	0	60	62	50.82	115	0	0	139	0	0
2	85881724	85881724	T	A	SNP	Olfr1033	NM_146578.2	mouse	genbank	58_37k	1	reviewed	missense	c.251	p.L84Q	0	HMMPfam_7tm_1,superfamily_SSF81321	HMMPfam_7tm_1,PatternScan_G_PROTEIN_RECEP_F1_1,PatternScan_LECTIN_LEGUME_ALPHA,superfamily_SSF81321	0	no_errors	MOC1	149	244	61.93	473	0	0	405	0	0	624	0	0
2	85925870	85925870	T	C	SNP	Olfr1037	NM_001011532.2	mouse	genbank	58_37k	-1	validated	silent	c.63	p.R21	0	superfamily_SSF81321	HMMPfam_7tm_1,PatternScan_G_PROTEIN_RECEP_F1_1,superfamily_SSF81321	0	no_errors	MOC22	90	0	0	35	54	60.67	85	0	0	113	0	0
2	85986387	85986387	A	C	SNP	Olfr1040	NM_207561.2	mouse	genbank	58_37k	-1	validated	missense	c.503	p.F168C	0	HMMPfam_7tm_1,superfamily_SSF81321	HMMPfam_7tm_1,PatternScan_G_PROTEIN_RECEP_F1_1,superfamily_SSF81321	0	no_errors	MOC23	139	0	0	168	0	0	63	41	39.42	166	1	0.6
2	86000374	86000374	A	T	SNP	Olfr1042	NM_001011777.2	mouse	genbank	58_37k	-1	validated	missense	c.152	p.V51E	0	HMMPfam_7tm_1,superfamily_SSF81321	HMMPfam_7tm_1,PatternScan_G_PROTEIN_RECEP_F1_1,superfamily_SSF81321	0	no_errors	MOC22	76	0	0	48	38	44.19	79	0	0	85	0	0
2	86002213	86002213	T	G	SNP	Olfr1043	NM_146577.2	mouse	genbank	58_37k	-1	validated	missense	c.892	p.K298Q	0	superfamily_SSF81321	HMMPfam_7tm_1,PatternScan_G_PROTEIN_RECEP_F1_1,superfamily_SSF81321	0	no_errors	MOC22	123	0	0	68	51	42.86	72	0	0	114	0	0
2	86038185	86038185	A	T	SNP	Olfr1045	NM_147017.2	mouse	genbank	58_37k	-1	validated	nonsense	c.723	p.C241*	0	HMMPfam_7tm_1,superfamily_SSF81321	HMMPfam_7tm_1,PatternScan_G_PROTEIN_RECEP_F1_1,superfamily_SSF81321	0	no_errors	MOC23	93	0	0	95	1	1.04	36	42	53.85	119	1	0.83
2	86068434	86068434	A	T	SNP	Olfr1047	NM_147012.1	mouse	genbank	58_37k	-1	provisional	silent	c.693	p.A231	0	HMMPfam_7tm_1,superfamily_SSF81321	HMMPfam_7tm_1,PatternScan_G_PROTEIN_RECEP_F1_1,superfamily_SSF81321	0	no_errors	MOC1	94	58	38.16	193	0	0	160	0	0	212	0	0
2	86115765	86115765	C	A	SNP	Olfr1051	NM_207562.1	mouse	genbank	58_37k	-1	validated	missense	c.878	p.R293M	0	superfamily_SSF81321	HMMPfam_7tm_1,PatternScan_G_PROTEIN_RECEP_F1_1,superfamily_SSF81321	0	no_errors	MOC1	23	32	58.18	59	0	0	43	0	0	65	0	0
2	86115887	86115887	A	G	SNP	Olfr1051	NM_207562.1	mouse	genbank	58_37k	-1	validated	silent	c.756	p.Y252	0	HMMPfam_7tm_1,superfamily_SSF81321	HMMPfam_7tm_1,PatternScan_G_PROTEIN_RECEP_F1_1,superfamily_SSF81321	0	no_errors	MOC22	133	0	0	84	26	23.64	106	0	0	146	0	0
2	86172634	86172634	T	C	SNP	Olfr1054	NM_147019.1	mouse	genbank	58_37k	-1	provisional	missense	c.878	p.N293S	0	superfamily_SSF81321	HMMPfam_7tm_1,PatternScan_G_PROTEIN_RECEP_F1_1,superfamily_SSF81321	0	no_errors	MOC22	84	0	0	50	44	46.81	67	0	0	85	0	0
2	86172909	86172909	T	A	SNP	Olfr1054	NM_147019.1	mouse	genbank	58_37k	-1	provisional	silent	c.603	p.S201	0	HMMPfam_7tm_1,superfamily_SSF81321	HMMPfam_7tm_1,PatternScan_G_PROTEIN_RECEP_F1_1,superfamily_SSF81321	0	no_errors	MOC1	40	21	34.43	64	0	0	52	0	0	69	0	0
2	86215497	86215497	T	A	SNP	Olfr1057	NM_207563.2	mouse	genbank	58_37k	-1	validated	missense	c.71	p.Q24L	0	superfamily_SSF81321	HMMPfam_7tm_1,PatternScan_G_PROTEIN_RECEP_F1_1,superfamily_SSF81321	0	no_errors	MOC22	266	0	0	177	156	46.71	295	2	0.67	384	1	0.26
2	86263248	86263248	G	A	SNP	Olfr1062	NM_147078.2	mouse	genbank	58_37k	-1	validated	missense	c.584	p.P195L	0	HMMPfam_7tm_1,superfamily_SSF81321	HMMPfam_7tm_1,PatternScan_G_PROTEIN_RECEP_F1_1,superfamily_SSF81321	0	no_errors	MOC23	101	0	0	110	0	0	35	45	56.25	95	0	0
2	86295857	86295857	T	A	SNP	Olfr1066	NM_001011735.2	mouse	genbank	58_37k	-1	validated	silent	c.570	p.S190	0	HMMPfam_7tm_1,superfamily_SSF81321	HMMPfam_7tm_1,superfamily_SSF81321	0	no_errors	MOC23	143	0	0	158	1	0.63	49	75	60.48	149	0	0
2	86349152	86349152	T	A	SNP	Olfr1076	NM_146406.2	mouse	genbank	58_37k	1	validated	missense	c.535	p.C179S	0	HMMPfam_7tm_1,superfamily_SSF81321	HMMPfam_7tm_1,superfamily_SSF81321	0	no_errors	MOC22	287	0	0	149	148	49.83	263	1	0.38	315	0	0
2	86378153	86378153	T	A	SNP	Olfr1079	NM_146407.1	mouse	genbank	58_37k	-1	provisional	silent	c.918	p.T306	0	superfamily_SSF81321	HMMPfam_7tm_1,PatternScan_G_PROTEIN_RECEP_F1_1,superfamily_SSF81321	0	no_errors	MOC23	76	0	0	90	0	0	27	31	53.45	83	0	0
2	86378405	86378405	G	T	SNP	Olfr1079	NM_146407.1	mouse	genbank	58_37k	-1	provisional	silent	c.666	p.L222	0	HMMPfam_7tm_1,superfamily_SSF81321	HMMPfam_7tm_1,PatternScan_G_PROTEIN_RECEP_F1_1,superfamily_SSF81321	0	no_errors	MOC23	149	0	0	115	0	0	61	42	40.78	139	0	0
2	86378560	86378560	A	T	SNP	Olfr1079	NM_146407.1	mouse	genbank	58_37k	-1	provisional	missense	c.511	p.C171S	0	HMMPfam_7tm_1,superfamily_SSF81321	HMMPfam_7tm_1,PatternScan_G_PROTEIN_RECEP_F1_1,superfamily_SSF81321	0	no_errors	MOC22	173	0	0	92	83	47.43	160	1	0.62	222	0	0
2	86378611	86378611	T	A	SNP	Olfr1079	NM_146407.1	mouse	genbank	58_37k	-1	provisional	missense	c.460	p.S154C	0	HMMPfam_7tm_1,superfamily_SSF81321	HMMPfam_7tm_1,PatternScan_G_PROTEIN_RECEP_F1_1,superfamily_SSF81321	0	no_errors	MOC23	137	0	0	165	0	0	66	58	46.77	194	1	0.51
2	86626614	86626614	T	G	SNP	Olfr1093	NM_146366.1	mouse	genbank	58_37k	1	provisional	silent	c.726	p.S242	0	HMMPfam_7tm_1,superfamily_SSF81321	HMMPfam_7tm_1,PatternScan_G_PROTEIN_RECEP_F1_1,superfamily_SSF81321	0	no_errors	MOC22	111	0	0	109	38	25.85	111	1	0.89	153	0	0
2	86646938	86646938	T	A	SNP	Olfr141	NM_181818.2	mouse	genbank	58_37k	-1	validated	missense	c.217	p.T73S	0	HMMPfam_7tm_1,superfamily_Family A G protein-coupled receptor-like	HMMPfam_7tm_1,PatternScan_G_PROTEIN_RECEP_F1_1,superfamily_Family A G protein-coupled receptor-like	0	no_errors	MOC1	45	54	54.55	110	0	0	87	0	0	110	0	0
2	86691160	86691160	T	G	SNP	Olfr1095	NM_146730.2	mouse	genbank	58_37k	-1	validated	silent	c.694	p.R232	0	HMMPfam_7tm_1,superfamily_SSF81321	HMMPfam_7tm_1,PatternScan_G_PROTEIN_RECEP_F1_1,superfamily_SSF81321	0	no_errors	MOC1	62	36	36.73	108	0	0	77	1	1.28	98	0	0
2	86763282	86763282	T	A	SNP	Olfr1098	NM_146845.2	mouse	genbank	58_37k	-1	validated	missense	c.406	p.M136L	0	HMMPfam_7tm_1,superfamily_SSF81321	HMMPfam_7tm_1,PatternScan_G_PROTEIN_RECEP_F1_1,superfamily_SSF81321	0	no_errors	MOC23	237	0	0	304	1	0.33	123	117	48.75	324	0	0
2	86763512	86763512	A	T	SNP	Olfr1098	NM_146845.2	mouse	genbank	58_37k	-1	validated	missense	c.176	p.M59K	0	HMMPfam_7tm_1,superfamily_SSF81321	HMMPfam_7tm_1,PatternScan_G_PROTEIN_RECEP_F1_1,superfamily_SSF81321	0	no_errors	MOC1	155	85	35.42	265	0	0	227	1	0.44	341	0	0
2	86799191	86799191	A	T	SNP	Olfr1099	NM_146768.1	mouse	genbank	58_37k	-1	provisional	nonsense	c.423	p.C141*	0	HMMPfam_7tm_1,superfamily_SSF81321	HMMPfam_7tm_1,PatternScan_G_PROTEIN_RECEP_F1_1,superfamily_SSF81321	0	no_errors	MOC1	62	32	34.04	109	0	0	97	0	0	115	0	0
2	86799290	86799290	T	A	SNP	Olfr1099	NM_146768.1	mouse	genbank	58_37k	-1	provisional	silent	c.324	p.A108	0	HMMPfam_7tm_1,superfamily_SSF81321	HMMPfam_7tm_1,PatternScan_G_PROTEIN_RECEP_F1_1,superfamily_SSF81321	0	no_errors	MOC1	30	59	66.29	120	0	0	71	0	0	98	0	0
2	86842193	86842193	T	A	SNP	Olfr1102	NM_207154.2	mouse	genbank	58_37k	1	validated	silent	c.66	p.T22	0	superfamily_SSF81321	HMMPfam_7tm_1,PatternScan_G_PROTEIN_RECEP_F1_1,superfamily_SSF81321	0	no_errors	MOC1	115	51	30.72	165	0	0	133	0	0	182	0	0
2	86861848	86861848	C	G	SNP	Olfr1104	NM_146767.2	mouse	genbank	58_37k	-1	validated	silent	c.852	p.L284	0	HMMPfam_7tm_1,superfamily_SSF81321	HMMPfam_7tm_1,PatternScan_G_PROTEIN_RECEP_F1_1,superfamily_SSF81321	0	no_errors	MOC22	154	0	0	150	26	14.77	144	0	0	209	0	0
2	86873872	86873872	A	T	SNP	Olfr1105	NM_001011825.1	mouse	genbank	58_37k	-1	provisional	missense	c.505	p.C169S	0	HMMPfam_7tm_1,superfamily_SSF81321	HMMPfam_7tm_1,PatternScan_G_PROTEIN_RECEP_F1_1,superfamily_SSF81321	0	no_errors	MOC1	19	29	60.42	62	0	0	32	0	0	53	0	0
2	86874293	86874293	G	T	SNP	Olfr1105	NM_001011825.1	mouse	genbank	58_37k	-1	provisional	silent	c.84	p.S28	0	superfamily_SSF81321	HMMPfam_7tm_1,PatternScan_G_PROTEIN_RECEP_F1_1,superfamily_SSF81321	0	no_errors	MOC1	37	58	61.05	97	0	0	94	0	0	103	0	0
2	86933276	86933276	T	A	SNP	Olfr1109	NM_146766.2	mouse	genbank	58_37k	-1	validated	nonsense	c.277	p.R93*	0	HMMPfam_7tm_1,superfamily_SSF81321	HMMPfam_7tm_1,PatternScan_G_PROTEIN_RECEP_F1_1,superfamily_SSF81321	0	no_errors	MOC23	95	0	0	117	0	0	47	31	39.74	108	0	0
2	87053566	87053566	G	T	SNP	Olfr1113	NM_207565.1	mouse	genbank	58_37k	1	provisional	silent	c.516	p.V172	0	HMMPfam_7tm_1,superfamily_SSF81321	HMMPfam_7tm_1,PatternScan_G_PROTEIN_RECEP_F1_1,superfamily_SSF81321	0	no_errors	MOC22	294	0	0	187	190	50.4	254	1	0.39	446	0	0
2	87235003	87235003	C	A	SNP	LOC668432	XR_033170.1	mouse	genbank	58_37k	1	model	rna	NULL	NULL	0	0	0	0	pseudogene	MOC23	17	0	0	15	0	0	6	10	62.5	11	0	0
2	87349704	87349704	T	A	SNP	Pramel6	NM_178249.2	mouse	genbank	58_37k	1	provisional	silent	c.654	p.P218	0	superfamily_SSF52047	superfamily_SSF52047	0	no_errors	MOC23	53	0	0	69	0	0	20	12	37.5	72	0	0
2	87349838	87349838	C	A	SNP	Pramel6	NM_178249.2	mouse	genbank	58_37k	1	provisional	missense	c.788	p.P263H	0	superfamily_SSF52047	superfamily_SSF52047	0	no_errors	MOC23	72	0	0	108	0	0	35	25	41.67	117	0	0
2	87349915	87349915	A	T	SNP	Pramel6	NM_178249.2	mouse	genbank	58_37k	1	provisional	nonsense	c.865	p.K289*	0	superfamily_SSF52047	superfamily_SSF52047	0	no_errors	MOC23	63	0	0	97	0	0	21	29	58	78	0	0
2	87350414	87350414	A	T	SNP	Pramel6	NM_178249.2	mouse	genbank	58_37k	1	provisional	missense	c.932	p.Q311L	0	superfamily_SSF52047	superfamily_SSF52047	0	no_errors	MOC22	150	1	0.66	96	82	46.07	105	0	0	180	0	0
2	87385251	87385251	G	T	SNP	Olfr1128	NM_146349.2	mouse	genbank	58_37k	-1	validated	missense	c.449	p.A150E	0	HMMPfam_7tm_1,superfamily_SSF81321	HMMPfam_7tm_1,superfamily_SSF81321	0	no_errors	MOC23	133	0	0	170	0	0	72	55	43.31	183	0	0
2	87385615	87385615	C	T	SNP	Olfr1128	NM_146349.2	mouse	genbank	58_37k	-1	validated	missense	c.85	p.A29T	0	superfamily_SSF81321	HMMPfam_7tm_1,superfamily_SSF81321	0	no_errors	MOC1	104	63	37.72	184	0	0	154	0	0	230	0	0
2	87415816	87415816	A	T	SNP	Olfr1129	NM_001011836.2	mouse	genbank	58_37k	1	validated	nonsense	c.574	p.K192*	0	HMMPfam_7tm_1,superfamily_SSF81321	HMMPfam_7tm_1,PatternScan_G_PROTEIN_RECEP_F1_1,superfamily_SSF81321	0	no_errors	MOC23	206	0	0	297	0	0	99	120	54.79	312	0	0
2	87468667	87468667	G	T	SNP	Olfr1131	NM_146658.2	mouse	genbank	58_37k	1	validated	missense	c.46	p.V16F	0	superfamily_SSF81321	HMMPfam_7tm_1,PatternScan_G_PROTEIN_RECEP_F1_1,superfamily_SSF81321	0	no_errors	MOC23	308	0	0	315	0	0	142	137	49.1	445	0	0
2	87485436	87485436	A	T	SNP	Olfr1133	NM_146351.2	mouse	genbank	58_37k	-1	validated	silent	c.843	p.V281	0	HMMPfam_7tm_1,superfamily_SSF81321	HMMPfam_7tm_1,superfamily_SSF81321	0	no_errors	MOC1	103	71	40.8	186	0	0	156	0	0	246	0	0
2	87512330	87512330	G	C	SNP	Olfr1135	NM_146660.2	mouse	genbank	58_37k	-1	provisional	missense	c.193	p.H65D	0	HMMPfam_7tm_1,superfamily_SSF81321	HMMPfam_7tm_1,PatternScan_G_PROTEIN_RECEP_F1_1,superfamily_SSF81321	0	no_errors	MOC22	175	0	0	97	76	43.93	141	0	0	212	0	0
2	87577879	87577879	T	A	SNP	Olfr1138	NM_146639.1	mouse	genbank	58_37k	-1	provisional	missense	c.601	p.T201S	0	HMMPfam_7tm_1,superfamily_SSF81321	HMMPfam_7tm_1,PatternScan_G_PROTEIN_RECEP_F1_1,PatternScan_BETA_LACTAMASE_A,superfamily_SSF81321	0	no_errors	MOC23	150	0	0	186	0	0	73	68	47.89	185	0	0
2	87578191	87578191	A	T	SNP	Olfr1138	NM_146639.1	mouse	genbank	58_37k	-1	provisional	missense	c.289	p.C97S	0	HMMPfam_7tm_1,superfamily_SSF81321	HMMPfam_7tm_1,PatternScan_G_PROTEIN_RECEP_F1_1,PatternScan_BETA_LACTAMASE_A,superfamily_SSF81321	0	no_errors	MOC1	102	79	43.65	184	0	0	168	0	0	227	0	0
2	87586421	87586421	A	T	SNP	Olfr1140	NM_146642.2	mouse	genbank	58_37k	1	validated	missense	c.67	p.M23L	0	superfamily_SSF81321	HMMPfam_7tm_1,PatternScan_G_PROTEIN_RECEP_F1_1,superfamily_SSF81321	0	no_errors	MOC23	139	0	0	156	1	0.64	74	53	41.73	145	1	0.68
2	87593344	87593344	C	G	SNP	Olfr1141	NM_146637.1	mouse	genbank	58_37k	-1	provisional	missense	c.805	p.D269H	0	HMMPfam_7tm_1,superfamily_SSF81321	HMMPfam_7tm_1,superfamily_SSF81321	0	no_errors	MOC22	77	0	0	49	49	50	66	2	2.94	115	0	0
2	87642604	87642604	G	C	SNP	Olfr1143	NM_146293.2	mouse	genbank	58_37k	1	validated	missense	c.57	p.M19I	0	superfamily_SSF81321	HMMPfam_7tm_1,PatternScan_G_PROTEIN_RECEP_F1_1,superfamily_SSF81321	0	no_errors	MOC23	130	0	0	138	0	0	32	56	63.64	169	0	0
2	87673237	87673237	A	T	SNP	Olfr1148	NM_001011519.1	mouse	genbank	58_37k	1	provisional	missense	c.40	p.T14S	0	superfamily_SSF81321	HMMPfam_7tm_1,PatternScan_G_PROTEIN_RECEP_F1_1,PatternScan_LECTIN_LEGUME_ALPHA,superfamily_SSF81321	0	no_errors	MOC1	59	28	32.18	89	0	0	68	0	0	111	0	0
2	87673942	87673942	T	A	SNP	Olfr1148	NM_001011519.1	mouse	genbank	58_37k	1	provisional	missense	c.745	p.S249T	0	HMMPfam_7tm_1,superfamily_SSF81321	HMMPfam_7tm_1,PatternScan_G_PROTEIN_RECEP_F1_1,PatternScan_LECTIN_LEGUME_ALPHA,superfamily_SSF81321	0	no_errors	MOC23	162	0	0	201	1	0.5	63	85	57.43	228	2	0.87
2	87708343	87708343	T	A	SNP	Olfr1152	NM_001011834.1	mouse	genbank	58_37k	1	provisional	missense	c.194	p.L65H	0	HMMPfam_7tm_1,superfamily_SSF81321	HMMPfam_7tm_1,PatternScan_G_PROTEIN_RECEP_F1_1,superfamily_SSF81321	0	no_errors	MOC1	57	104	63.41	174	0	0	137	0	0	233	0	0
2	87708830	87708830	G	C	SNP	Olfr1152	NM_001011834.1	mouse	genbank	58_37k	1	provisional	missense	c.681	p.K227N	0	HMMPfam_7tm_1,superfamily_SSF81321	HMMPfam_7tm_1,PatternScan_G_PROTEIN_RECEP_F1_1,superfamily_SSF81321	0	no_errors	MOC22	229	0	0	122	128	51.2	182	0	0	297	0	0
2	87736348	87736348	A	G	SNP	Olfr1153	NM_146640.2	mouse	genbank	58_37k	1	validated	silent	c.15	p.K5	0	NULL	HMMPfam_7tm_1,PatternScan_G_PROTEIN_RECEP_F1_1,superfamily_SSF81321	0	no_errors	MOC23	101	0	0	111	0	0	50	31	38.27	106	0	0
2	87911312	87911312	A	T	SNP	Olfr1163	NM_146644.2	mouse	genbank	58_37k	-1	validated	missense	c.226	p.S76T	0	HMMPfam_7tm_1,superfamily_SSF81321	HMMPfam_7tm_1,PatternScan_G_PROTEIN_RECEP_F1_1,superfamily_SSF81321	0	no_errors	MOC22	103	0	0	52	48	48	75	1	1.32	129	0	0
2	87941460	87941460	A	T	SNP	Olfr1165	NM_146648.1	mouse	genbank	58_37k	-1	validated	nonsense	c.683	p.L228*	0	NULL	HMMPfam_7tm_1,superfamily_Family A G protein-coupled receptor-like	0	pseudogene:no_stop_codon:bad_bp_length_for_coding_region	MOC23	119	0	0	141	0	0	66	35	34.65	157	0	0
2	87941573	87941573	A	T	SNP	Olfr1165	NM_146648.1	mouse	genbank	58_37k	-1	validated	silent	c.570	p.P190	0	NULL	HMMPfam_7tm_1,superfamily_Family A G protein-coupled receptor-like	0	pseudogene:no_stop_codon:bad_bp_length_for_coding_region	MOC23	108	0	0	117	0	0	46	60	56.6	157	0	0
2	88025377	88025377	A	T	SNP	Olfr1168	NM_146531.2	mouse	genbank	58_37k	1	validated	silent	c.342	p.A114	0	HMMPfam_7tm_1,PatternScan_G_PROTEIN_RECEP_F1_1,superfamily_SSF81321	HMMPfam_7tm_1,PatternScan_G_PROTEIN_RECEP_F1_1,superfamily_SSF81321	0	no_errors	MOC22	196	0	0	115	99	46.26	205	1	0.49	258	0	0
2	88064719	88064719	A	T	SNP	Olfr1170	NM_146532.1	mouse	genbank	58_37k	-1	provisional	missense	c.469	p.C157S	0	HMMPfam_7tm_1,superfamily_SSF81321	HMMPfam_7tm_1,PatternScan_G_PROTEIN_RECEP_F1_1,superfamily_SSF81321	0	no_errors	MOC22	152	0	0	82	90	52.33	120	1	0.83	210	0	0
2	88286363	88286363	A	T	SNP	Olfr1182	NM_001011535.2	mouse	genbank	58_37k	-1	validated	missense	c.731	p.V244D	0	HMMPfam_7tm_1,superfamily_SSF81321	HMMPfam_7tm_1,PatternScan_G_PROTEIN_RECEP_F1_1,superfamily_SSF81321	0	no_errors	MOC22	163	0	0	158	50	23.92	141	1	0.7	202	0	0
2	88286522	88286522	T	A	SNP	Olfr1182	NM_001011535.2	mouse	genbank	58_37k	-1	validated	missense	c.572	p.Y191F	0	HMMPfam_7tm_1,superfamily_SSF81321	HMMPfam_7tm_1,PatternScan_G_PROTEIN_RECEP_F1_1,superfamily_SSF81321	0	no_errors	MOC22	148	0	0	83	71	46.1	137	1	0.72	204	1	0.49
2	88432024	88432024	T	A	SNP	Olfr1189	NM_146772.2	mouse	genbank	58_37k	1	validated	missense	c.62	p.L21Q	0	superfamily_SSF81321	HMMPfam_7tm_1,PatternScan_G_PROTEIN_RECEP_F1_1,superfamily_SSF81321	0	no_errors	MOC23	82	0	0	117	0	0	50	36	41.86	142	0	0
2	88523741	88523741	T	G	SNP	Olfr1195	NM_146753.2	mouse	genbank	58_37k	-1	validated	silent	c.147	p.T49	0	HMMPfam_7tm_1,superfamily_SSF81321	HMMPfam_7tm_1,PatternScan_G_PROTEIN_RECEP_F1_1,superfamily_SSF81321	0	no_errors	MOC23	81	0	0	97	0	0	37	38	50.67	96	0	0
2	88540569	88540569	T	A	SNP	Olfr1196	NM_146464.2	mouse	genbank	58_37k	-1	validated	nonsense	c.916	p.R306*	0	superfamily_SSF81321	HMMPfam_7tm_1,PatternScan_G_PROTEIN_RECEP_F1_1,superfamily_SSF81321	0	no_errors	MOC23	129	0	0	151	0	0	57	57	50	185	0	0
2	88541139	88541139	T	A	SNP	Olfr1196	NM_146464.2	mouse	genbank	58_37k	-1	validated	missense	c.346	p.M116L	0	HMMPfam_7tm_1,PatternScan_G_PROTEIN_RECEP_F1_1,superfamily_SSF81321	HMMPfam_7tm_1,PatternScan_G_PROTEIN_RECEP_F1_1,superfamily_SSF81321	0	no_errors	MOC22	137	0	0	1	156	99.36	116	1	0.85	158	0	0
2	88569571	88569571	A	T	SNP	Olfr1197	NM_001005225.1	mouse	genbank	58_37k	-1	provisional	missense	c.184	p.C62S	0	HMMPfam_7tm_1,superfamily_SSF81321	HMMPfam_7tm_1,PatternScan_G_PROTEIN_RECEP_F1_1,superfamily_SSF81321	0	no_errors	MOC23	158	0	0	162	1	0.61	51	71	57.72	183	2	1.08
2	88813797	88813797	A	T	SNP	Olfr1213	NM_146898.2	mouse	genbank	58_37k	-1	validated	missense	c.250	p.L84M	0	HMMPfam_7tm_1,superfamily_SSF81321	HMMPfam_7tm_1,PatternScan_G_PROTEIN_RECEP_F1_1,superfamily_SSF81321	0	no_errors	MOC23	146	0	0	165	0	0	73	72	49.66	191	1	0.52
2	88813893	88813893	C	A	SNP	Olfr1213	NM_146898.2	mouse	genbank	58_37k	-1	validated	missense	c.154	p.A52S	0	HMMPfam_7tm_1,superfamily_SSF81321	HMMPfam_7tm_1,PatternScan_G_PROTEIN_RECEP_F1_1,superfamily_SSF81321	0	no_errors	MOC23	126	0	0	141	0	0	59	54	47.79	152	1	0.65
2	88827679	88827679	G	T	SNP	Olfr1214	NM_146897.2	mouse	genbank	58_37k	-1	validated	missense	c.679	p.H227N	0	HMMPfam_7tm_1,superfamily_SSF81321	HMMPfam_7tm_1,PatternScan_G_PROTEIN_RECEP_F1_1,superfamily_SSF81321	0	no_errors	MOC23	128	0	0	126	0	0	42	56	57.14	135	0	0
2	88895140	88895140	A	T	SNP	Olfr1218	NM_146818.2	mouse	genbank	58_37k	-1	validated	missense	c.442	p.W148R	0	HMMPfam_7tm_1,superfamily_SSF81321	HMMPfam_7tm_1,PatternScan_G_PROTEIN_RECEP_F1_1,superfamily_SSF81321	0	no_errors	MOC1	120	63	34.43	212	0	0	168	0	0	248	0	0
2	88914899	88914899	G	T	SNP	Olfr1219	NM_146899.2	mouse	genbank	58_37k	-1	validated	silent	c.348	p.S116	0	HMMPfam_7tm_1,PatternScan_G_PROTEIN_RECEP_F1_1,superfamily_SSF81321	HMMPfam_7tm_1,PatternScan_G_PROTEIN_RECEP_F1_1,superfamily_SSF81321	0	no_errors	MOC22	207	0	0	114	116	50.22	203	2	0.98	298	0	0
2	88965756	88965756	A	T	SNP	Olfr1222	NM_001011860.1	mouse	genbank	58_37k	-1	provisional	missense	c.131	p.V44E	0	HMMPfam_7tm_1,superfamily_SSF81321	HMMPfam_7tm_1,PatternScan_G_PROTEIN_RECEP_F1_1,superfamily_SSF81321	0	no_errors	MOC22	120	0	0	75	78	50.98	120	1	0.83	158	1	0.63
2	88984497	88984497	T	A	SNP	Olfr1223	NM_146892.2	mouse	genbank	58_37k	-1	validated	missense	c.682	p.S228C	0	HMMPfam_7tm_1,superfamily_SSF81321	HMMPfam_7tm_1,PatternScan_G_PROTEIN_RECEP_F1_1,superfamily_SSF81321	0	no_errors	MOC23	153	0	0	145	0	0	44	52	54.17	147	0	0
2	89010441	89010441	A	T	SNP	Olfr1225	NM_146891.2	mouse	genbank	58_37k	-1	validated	missense	c.927	p.D309E	0	NULL	HMMPfam_7tm_1,PatternScan_G_PROTEIN_RECEP_F1_1,superfamily_SSF81321	0	no_errors	MOC1	60	18	23.08	85	0	0	69	0	0	102	0	0
2	89089479	89089479	A	T	SNP	Olfr1228	NM_146971.1	mouse	genbank	58_37k	-1	provisional	missense	c.371	p.I124N	0	HMMPfam_7tm_1,PatternScan_G_PROTEIN_RECEP_F1_1,superfamily_SSF81321	HMMPfam_7tm_1,PatternScan_G_PROTEIN_RECEP_F1_1,superfamily_SSF81321	0	no_errors	MOC22	147	0	0	73	106	58.89	133	0	0	177	1	0.56
2	89136780	89136780	A	C	SNP	Olfr1230	NM_146789.1	mouse	genbank	58_37k	-1	provisional	missense	c.646	p.Y216D	0	HMMPfam_7tm_1,superfamily_SSF81321	HMMPfam_7tm_1,superfamily_SSF81321	0	no_errors	MOC1	37	53	58.89	112	0	0	82	0	0	118	0	0
2	89165513	89165513	T	A	SNP	Olfr1232	NM_146323.1	mouse	genbank	58_37k	-1	provisional	missense	c.823	p.T275S	0	HMMPfam_7tm_1,superfamily_SSF81321	HMMPfam_7tm_1,PatternScan_G_PROTEIN_RECEP_F1_1,superfamily_SSF81321	0	no_errors	MOC23	106	1	0.93	117	0	0	64	34	34.69	127	0	0
2	89165580	89165580	T	A	SNP	Olfr1232	NM_146323.1	mouse	genbank	58_37k	-1	provisional	silent	c.756	p.P252	0	HMMPfam_7tm_1,superfamily_SSF81321	HMMPfam_7tm_1,PatternScan_G_PROTEIN_RECEP_F1_1,superfamily_SSF81321	0	no_errors	MOC23	106	0	0	109	0	0	49	32	39.51	121	0	0
2	89179758	89179758	A	T	SNP	Olfr1233	NM_146972.1	mouse	genbank	58_37k	-1	provisional	missense	c.700	p.C234S	0	HMMPfam_7tm_1,superfamily_SSF81321	HMMPfam_7tm_1,PatternScan_G_PROTEIN_RECEP_F1_1,superfamily_SSF81321	0	no_errors	MOC23	96	0	0	123	0	0	45	43	48.86	151	0	0
2	89258381	89258381	T	A	SNP	Olfr1239	NM_146970.1	mouse	genbank	58_37k	-1	provisional	missense	c.188	p.Y63F	0	HMMPfam_7tm_1,superfamily_SSF81321	HMMPfam_7tm_1,PatternScan_G_PROTEIN_RECEP_F1_1,PatternScan_LECTIN_LEGUME_ALPHA,superfamily_SSF81321	0	no_errors	MOC22	99	0	0	48	43	47.25	83	0	0	104	0	0
2	89323144	89323144	G	T	SNP	Olfr1241	NM_146455.1	mouse	genbank	58_37k	-1	provisional	silent	c.147	p.A49	0	HMMPfam_7tm_1,superfamily_SSF81321	HMMPfam_7tm_1,PatternScan_G_PROTEIN_RECEP_F1_1,superfamily_SSF81321	0	no_errors	MOC1	109	76	41.08	227	1	0.44	174	1	0.57	262	1	0.38
2	89415541	89415541	A	T	SNP	Olfr1245	NM_146788.2	mouse	genbank	58_37k	-1	validated	missense	c.341	p.V114E	0	HMMPfam_7tm_1,PatternScan_G_PROTEIN_RECEP_F1_1,superfamily_SSF81321	HMMPfam_7tm_1,PatternScan_G_PROTEIN_RECEP_F1_1,superfamily_SSF81321	0	no_errors	MOC23	117	0	0	125	0	0	52	28	35	131	0	0
2	89415598	89415598	C	A	SNP	Olfr1245	NM_146788.2	mouse	genbank	58_37k	-1	validated	missense	c.284	p.C95F	0	HMMPfam_7tm_1,superfamily_SSF81321	HMMPfam_7tm_1,PatternScan_G_PROTEIN_RECEP_F1_1,superfamily_SSF81321	0	no_errors	MOC23	139	0	0	143	0	0	39	66	62.86	139	1	0.71
2	89415599	89415599	A	T	SNP	Olfr1245	NM_146788.2	mouse	genbank	58_37k	-1	validated	missense	c.283	p.C95S	0	HMMPfam_7tm_1,superfamily_SSF81321	HMMPfam_7tm_1,PatternScan_G_PROTEIN_RECEP_F1_1,superfamily_SSF81321	0	no_errors	MOC23	141	0	0	142	0	0	40	66	62.26	140	1	0.71
2	89458153	89458153	T	A	SNP	Olfr1248	NM_146791.2	mouse	genbank	58_37k	-1	validated	silent	c.195	p.S65	0	HMMPfam_7tm_1,superfamily_SSF81321	HMMPfam_7tm_1,superfamily_SSF81321	0	no_errors	MOC23	158	0	0	210	0	0	75	99	56.9	212	2	0.93
2	89592726	89592726	C	G	SNP	Olfr1559-ps1	ENSMUST00000099765	mouse	ensembl	58_37k	-1	known	missense	c.258	p.E86D	0	HMMPfam_7tm_1,superfamily_SSF81321	HMMPfam_7tm_1,PatternScan_G_PROTEIN_RECEP_F1_1,PatternScan_LECTIN_LEGUME_ALPHA,superfamily_SSF81321	0	no_errors	MOC22	179	0	0	117	130	52.42	170	2	1.16	287	0	0
2	89629418	89629418	T	A	SNP	Olfr1254	NM_146476.1	mouse	genbank	58_37k	-1	provisional	silent	c.90	p.L30	0	superfamily_SSF81321	HMMPfam_7tm_1,PatternScan_G_PROTEIN_RECEP_F1_1,superfamily_SSF81321	0	no_errors	MOC22	150	1	0.66	2	160	98.77	107	0	0	189	2	1.05
2	89675818	89675818	A	T	SNP	Olfr1256	NM_146983.1	mouse	genbank	58_37k	-1	provisional	missense	c.283	p.C95S	0	HMMPfam_7tm_1,superfamily_SSF81321	HMMPfam_7tm_1,PatternScan_G_PROTEIN_RECEP_F1_1,superfamily_SSF81321	0	no_errors	MOC22	104	0	0	62	58	48.33	106	1	0.93	83	0	0
2	89721367	89721367	T	A	SNP	Olfr1257	NM_146982.1	mouse	genbank	58_37k	1	provisional	missense	c.383	p.L128H	0	HMMPfam_7tm_1,superfamily_SSF81321	HMMPfam_7tm_1,PatternScan_G_PROTEIN_RECEP_F1_1,superfamily_SSF81321	0	no_errors	MOC22	245	0	0	165	160	49.23	244	0	0	324	1	0.31
2	89770430	89770430	A	T	SNP	Olfr1258	NM_146978.1	mouse	genbank	58_37k	1	provisional	missense	c.463	p.T155S	0	HMMPfam_7tm_1,superfamily_SSF81321	HMMPfam_7tm_1,PatternScan_G_PROTEIN_RECEP_F1_1,PatternScan_LECTIN_LEGUME_ALPHA,superfamily_SSF81321	0	no_errors	MOC23	104	0	0	126	0	0	44	59	57.28	127	1	0.78
2	89842893	89842893	T	A	SNP	Olfr1262	NM_146974.1	mouse	genbank	58_37k	1	provisional	missense	c.329	p.L110Q	0	HMMPfam_7tm_1,PatternScan_G_PROTEIN_RECEP_F1_1,superfamily_SSF81321	HMMPfam_7tm_1,PatternScan_G_PROTEIN_RECEP_F1_1,superfamily_SSF81321	0	no_errors	MOC1	95	124	56.62	278	0	0	228	1	0.44	275	0	0
2	89843361	89843361	T	A	SNP	Olfr1262	NM_146974.1	mouse	genbank	58_37k	1	provisional	missense	c.797	p.V266E	0	HMMPfam_7tm_1,superfamily_SSF81321	HMMPfam_7tm_1,PatternScan_G_PROTEIN_RECEP_F1_1,superfamily_SSF81321	0	no_errors	MOC22	234	0	0	133	136	50.37	212	1	0.47	251	0	0
2	89988825	89988825	A	T	SNP	LOC100043090	XM_001478712.1	mouse	genbank	58_37k	1	model	missense	c.209	p.Q70L	0	HMMPfam_Homeobox,HMMSmart_SM00389,superfamily_Homeodomain-like	HMMPfam_Homeobox,HMMSmart_SM00389,superfamily_Homeodomain-like	0	no_errors	MOC23	150	0	0	153	0	0	54	69	56.1	168	2	1.18
2	89989435	89989435	T	C	SNP	Olfr1270	NM_146985.2	mouse	genbank	58_37k	-1	validated	missense	c.727	p.T243A	0	HMMPfam_7tm_1,superfamily_SSF81321	HMMPfam_7tm_1,PatternScan_G_PROTEIN_RECEP_F1_1,superfamily_SSF81321	0	no_errors	MOC22	225	0	0	139	115	45.1	214	1	0.47	255	4	1.53
2	90092615	90092615	A	T	SNP	Olfr142	NM_146984.1	mouse	genbank	58_37k	-1	provisional	missense	c.529	p.C177S	0	HMMPfam_7tm_1,superfamily_Family A G protein-coupled receptor-like	HMMPfam_7tm_1,PatternScan_G_PROTEIN_RECEP_F1_1,superfamily_Family A G protein-coupled receptor-like	0	no_errors	MOC22	295	1	0.34	165	157	48.76	275	3	1.08	341	1	0.29
2	90105931	90105931	T	A	SNP	Olfr1271	NM_146793.1	mouse	genbank	58_37k	-1	provisional	missense	c.655	p.I219F	0	HMMPfam_7tm_1,superfamily_SSF81321	HMMPfam_7tm_1,PatternScan_G_PROTEIN_RECEP_F1_1,superfamily_SSF81321	0	no_errors	MOC23	210	0	0	204	1	0.49	107	71	39.66	242	0	0
2	90105932	90105932	G	T	SNP	Olfr1271	NM_146793.1	mouse	genbank	58_37k	-1	provisional	silent	c.654	p.V218	0	HMMPfam_7tm_1,superfamily_SSF81321	HMMPfam_7tm_1,PatternScan_G_PROTEIN_RECEP_F1_1,superfamily_SSF81321	0	no_errors	MOC23	206	0	0	200	1	0.5	106	73	40.78	239	0	0
2	90106493	90106493	A	T	SNP	Olfr1271	NM_146793.1	mouse	genbank	58_37k	-1	provisional	silent	c.93	p.P31	0	superfamily_SSF81321	HMMPfam_7tm_1,PatternScan_G_PROTEIN_RECEP_F1_1,superfamily_SSF81321	0	no_errors	MOC1	98	162	62.31	308	0	0	241	1	0.41	319	0	0
2	90241620	90241620	G	A	SNP	Olfr1274	NM_146263.2	mouse	genbank	58_37k	1	validated	silent	c.801	p.K267	0	HMMPfam_7tm_1,superfamily_Family A G protein-coupled receptor-like	HMMPfam_7tm_1,PatternScan_G_PROTEIN_RECEP_F1_1,superfamily_Family A G protein-coupled receptor-like	0	no_errors	MOC23	181	0	0	189	0	0	56	70	55.56	194	0	0
2	90293051	90293051	T	A	SNP	LOC671440	XR_034883.1	mouse	genbank	58_37k	1	model	rna	NULL	NULL	0	0	0	0	pseudogene	MOC1	17	20	54.05	43	1	2.27	34	0	0	52	0	0
2	90293497	90293497	T	A	SNP	Ptprj	NM_008982.5	mouse	genbank	58_37k	-1	validated	missense	c.2432	p.N811I	0	HMMSmart_FN3	HMMPfam_Y_phosphatase,HMMSmart_PTPc,HMMPfam_fn3,HMMSmart_FN3,superfamily_FN_III-like,PatternScan_TYR_PHOSPHATASE_1,superfamily_SSF52799	0	no_errors	MOC1	46	57	54.29	110	0	0	79	0	0	104	0	0
2	90730299	90730299	A	T	SNP	C1qtnf4	NM_026161.3	mouse	genbank	58_37k	1	validated	missense	c.395	p.Q132L	0	HMMPfam_C1q,HMMSmart_SM00110,superfamily_TNF-like	HMMPfam_C1q,HMMSmart_SM00110,superfamily_TNF-like	0	no_errors	MOC22	48	0	0	7	12	63.16	24	0	0	22	0	0
2	90838811	90838811	A	T	SNP	Celf1	NM_017368.2	mouse	genbank	58_37k	1	validated	missense	c.146	p.Q49L	0	HMMPfam_RRM_1,HMMSmart_RRM,superfamily_SSF54928	HMMPfam_RRM_1,HMMSmart_RRM,superfamily_SSF54928	0	no_errors	MOC23	84	1	1.18	82	0	0	37	43	53.75	79	1	1.25
2	90896071	90896071	A	C	SNP	Psmc3	NM_008948.2	mouse	genbank	58_37k	1	validated	missense	c.472	p.K158Q	0	NULL	HMMSmart_SM00382,HMMPfam_AAA,PatternScan_AAA,superfamily_P-loop containing nucleoside triphosphate hydrolases	0	no_errors	MOC1	65	56	46.28	116	0	0	109	0	0	106	0	0
2	90896885	90896885	A	T	SNP	Psmc3	NM_008948.2	mouse	genbank	58_37k	1	validated	missense	c.671	p.K224I	0	HMMSmart_SM00382,superfamily_P-loop containing nucleoside triphosphate hydrolases	HMMSmart_SM00382,HMMPfam_AAA,PatternScan_AAA,superfamily_P-loop containing nucleoside triphosphate hydrolases	0	no_errors	MOC23	105	0	0	98	0	0	45	47	51.09	87	0	0
2	90939607	90939607	T	A	SNP	Sfpi1	NM_011355.1	mouse	genbank	58_37k	1	provisional	silent	c.66	p.T22	0	NULL	HMMPfam_Ets,HMMSmart_SM00413,PatternScan_ETS_DOMAIN_1,PatternScan_ETS_DOMAIN_2,superfamily_Winged helix DNA-binding domain	0	no_errors	MOC1	85	134	60.91	182	0	0	178	0	0	189	0	0
2	90953543	90953543	G	C	SNP	Sfpi1	NM_011355.1	mouse	genbank	58_37k	1	provisional	missense	c.274	p.E92Q	0	NULL	HMMPfam_Ets,HMMSmart_SM00413,PatternScan_ETS_DOMAIN_1,PatternScan_ETS_DOMAIN_2,superfamily_Winged helix DNA-binding domain	0	no_errors	MOC1	75	119	61.34	166	0	0	157	0	0	205	0	0
2	91100326	91100326	A	T	SNP	Pacsin3	NM_028733.3	mouse	genbank	58_37k	1	validated	splice_site	c.1-2	e1-2	0	0	0	0	no_errors	MOC23	193	0	0	157	0	0	85	45	34.62	155	0	0
2	91104031	91104031	A	T	SNP	Pacsin3	NM_028733.3	mouse	genbank	58_37k	1	validated	missense	c.1147	p.S383C	0	HMMPfam_SH3_1,HMMSmart_SM00326,superfamily_SH3-domain	HMMPfam_FCH,HMMSmart_SM00055,HMMPfam_SH3_1,HMMSmart_SM00326,superfamily_SH3-domain	0	no_errors	MOC1	78	36	31.3	118	0	0	95	0	0	145	0	0
2	91284831	91284831	T	A	SNP	1110051M20Rik	ENSMUST00000111344	mouse	ensembl	58_37k	-1	known	missense	c.5	p.Q2L	0	NULL	NULL	0	no_errors	MOC23	58	0	0	81	0	0	35	30	46.15	60	0	0
2	91341287	91341287	A	T	SNP	Lrp4	NM_172668.3	mouse	genbank	58_37k	1	validated	missense	c.4834	p.T1612S	0	superfamily_YWTD domain	HMMPfam_Ldl_recept_b,HMMSmart_SM00135,PatternScan_ASX_HYDROXYL,HMMSmart_SM00179,HMMPfam_Ldl_recept_a,HMMSmart_SM00192,PatternScan_LDLRA_1,superfamily_LDL receptor-like module,HMMPfam_EGF,HMMSmart_SM00181,PatternScan_EGF_1,PatternScan_EGF_2,HMMPfam_EGF_CA,PatternScan_EGF_CA,superfamily_EGF/Laminin,superfamily_YWTD domain	0	no_errors	MOC1	58	63	52.07	137	0	0	110	0	0	120	0	0
2	91403214	91403214	A	T	SNP	Ckap5	NM_029437.2	mouse	genbank	58_37k	1	validated	missense	c.1282	p.T428S	0	superfamily_ARM-type_fold	HMMPfam_HEAT,superfamily_ARM-type_fold	0	no_errors	MOC22	60	0	0	33	23	39.66	48	0	0	59	1	1.67
2	91552718	91552718	A	T	SNP	Harbi1	NM_178724.4	mouse	genbank	58_37k	1	provisional	silent	c.366	p.P122	0	NULL	NULL	0	no_errors	MOC23	112	0	0	103	1	0.96	31	48	60.76	87	0	0
2	91779522	91779522	C	A	SNP	Dgkz	NM_138306.2	mouse	genbank	58_37k	-1	validated	nonsense	c.1285	p.E429*	0	NULL	HMMPfam_DAGK_acc,HMMSmart_DAGKa,HMMPfam_DAGK_cat,HMMSmart_DAGKc,HMMPfam_Ank,HMMSmart_ANK,superfamily_ANK,HMMPfam_C1_1,HMMSmart_C1	0	no_errors	MOC1	132	188	58.75	339	0	0	295	0	0	365	0	0
2	91779823	91779823	T	A	SNP	Dgkz	NM_138306.2	mouse	genbank	58_37k	-1	validated	splice_site	c.1072-2	e13-2	0	0	0	0	no_errors	MOC23	94	0	0	116	0	0	41	38	48.1	86	1	1.15
2	91784932	91784932	T	A	SNP	Dgkz	NM_138306.2	mouse	genbank	58_37k	-1	validated	missense	c.256	p.T86S	0	NULL	HMMPfam_DAGK_acc,HMMSmart_DAGKa,HMMPfam_DAGK_cat,HMMSmart_DAGKc,HMMPfam_Ank,HMMSmart_ANK,superfamily_ANK,HMMPfam_C1_1,HMMSmart_C1	0	no_errors	MOC22	184	1	0.54	106	90	45.92	152	0	0	233	0	0
2	91785903	91785903	C	A	SNP	Dgkz	ENSMUST00000111303	mouse	ensembl	58_37k	-1	known	missense	c.171	p.Q57H	0	NULL	HMMPfam_DAGK_acc,HMMSmart_DAGKa,HMMPfam_DAGK_cat,HMMSmart_DAGKc,HMMPfam_Ank,HMMSmart_ANK,superfamily_ANK,HMMPfam_C1_1,HMMSmart_C1	0	no_errors	MOC23	51	0	0	61	0	0	25	25	50	74	0	0
2	92209666	92209666	T	A	SNP	Gyltl1b	NM_172670.2	mouse	genbank	58_37k	-1	validated	silent	c.375	p.A125	0	HMMPfam_Glyco_transf_8,superfamily_Nucleotide-diphospho-sugar transferases	HMMPfam_Glyco_transf_8,superfamily_Nucleotide-diphospho-sugar transferases	0	no_errors	MOC22	71	0	0	38	57	60	57	1	1.72	95	0	0
2	92219103	92219103	A	T	SNP	Pex16	NM_145122.2	mouse	genbank	58_37k	1	validated	missense	c.692	p.H231L	0	HMMPfam_Pex16	HMMPfam_Pex16	0	no_errors	MOC23	144	0	0	140	1	0.71	54	76	58.46	160	0	0
2	92220613	92220613	G	T	SNP	Pex16	NM_145122.2	mouse	genbank	58_37k	1	validated	missense	c.934	p.G312C	0	HMMPfam_Pex16	HMMPfam_Pex16	0	no_errors	MOC22	323	1	0.31	161	143	47.04	265	0	0	387	0	0
2	92253262	92253262	C	A	SNP	Cry2	NM_009963.4	mouse	genbank	58_37k	-1	validated	nonsense	c.1390	p.E464*	0	HMMPfam_FAD_binding_7,superfamily_Cryptochrome/photolyase FAD-binding domain	HMMPfam_FAD_binding_7,superfamily_Cryptochrome/photolyase FAD-binding domain,HMMPfam_DNA_photolyase,superfamily_Cryptochrome/photolyase N-terminal domain	0	no_errors	MOC22	166	1	0.6	0	173	100	142	2	1.39	188	0	0
2	92294801	92294801	T	A	SNP	Slc35c1	ENSMUST00000125276	mouse	ensembl	58_37k	-1	known	missense	c.791	p.Q264L	0	HMMPfam_TPT	HMMPfam_TPT	0	pseudogene:no_stop_codon:bad_bp_length_for_coding_region	MOC1	17	24	58.54	50	0	0	33	0	0	43	0	0
2	92829607	92829607	T	A	SNP	Prdm11	ENSMUST00000111272	mouse	ensembl	58_37k	-1	known	missense	c.614	p.K205M	0	HMMSmart_SANT	HMMSmart_SANT	0	no_errors	MOC23	234	0	0	236	0	0	121	100	45.25	315	0	0
2	93517428	93517428	T	A	SNP	Alx4	NM_007442.3	mouse	genbank	58_37k	1	validated	missense	c.910	p.S304T	0	NULL	HMMPfam_Homeobox,HMMSmart_SM00389,HMMPfam_OAR,superfamily_Homeodomain-like,PatternScan_HOMEOBOX_1	0	no_errors	MOC23	168	0	0	174	0	0	64	47	42.34	188	0	0
2	93676474	93676474	C	A	SNP	Accs	NM_183220.2	mouse	genbank	58_37k	-1	provisional	missense	c.1059	p.Q353H	0	HMMPfam_Aminotran_1_2,superfamily_PyrdxlP-dep_Trfase_major	HMMPfam_Aminotran_1_2,superfamily_PyrdxlP-dep_Trfase_major	0	no_errors	MOC23	143	0	0	153	0	0	67	52	43.7	153	0	0
2	93704587	93704587	T	A	SNP	Accsl	NM_001033452.3	mouse	genbank	58_37k	-1	provisional	missense	c.592	p.S198C	0	HMMPfam_Aminotran_1_2,superfamily_PLP-dependent transferases	HMMPfam_Aminotran_1_2,superfamily_PLP-dependent transferases	0	no_errors	MOC23	48	0	0	48	0	0	27	9	25	57	0	0
2	94145132	94145132	T	A	SNP	Ttc17	NM_183106.2	mouse	genbank	58_37k	-1	validated	missense	c.3290	p.Q1097L	0	HMMSmart_SM00028,superfamily_TPR-like	HMMPfam_TPR_1,HMMPfam_TPR_2,HMMSmart_SM00028,superfamily_TPR-like	0	no_errors	MOC1	89	68	43.31	176	0	0	125	0	0	184	0	0
2	97469197	97469197	A	T	SNP	Lrrc4c	NM_178725.5	mouse	genbank	58_37k	1	validated	nonsense	c.10	p.K4*	0	NULL	HMMPfam_LRRNT,HMMSmart_SM00013,HMMPfam_LRR_1,HMMSmart_SM00369,HMMSmart_SM00406,HMMSmart_SM00408,HMMSmart_SM00409,HMMPfam_I-set,superfamily_Immunoglobulin,superfamily_L domain-like	0	no_errors	MOC23	76	0	0	79	0	0	34	19	35.85	89	1	1.11
2	97470127	97470127	T	A	SNP	Lrrc4c	NM_178725.5	mouse	genbank	58_37k	1	validated	missense	c.940	p.W314R	0	superfamily_L domain-like	HMMPfam_LRRNT,HMMSmart_SM00013,HMMPfam_LRR_1,HMMSmart_SM00369,HMMSmart_SM00406,HMMSmart_SM00408,HMMSmart_SM00409,HMMPfam_I-set,superfamily_Immunoglobulin,superfamily_L domain-like	0	no_errors	MOC1	62	80	55.94	151	1	0.66	95	0	0	203	0	0
2	97788782	97788782	C	G	SNP	LOC621146	XR_034296.1	mouse	genbank	58_37k	-1	model	rna	NULL	NULL	0	0	0	0	pseudogene	MOC23	137	0	0	168	0	0	85	46	35.11	175	0	0
2	97789556	97789556	T	A	SNP	LOC621146	XR_034296.1	mouse	genbank	58_37k	-1	model	rna	NULL	NULL	0	0	0	0	pseudogene	MOC22	187	0	0	124	107	46.32	177	0	0	281	0	0
2	97789901	97789901	C	G	SNP	LOC621146	XR_034296.1	mouse	genbank	58_37k	-1	model	rna	NULL	NULL	0	0	0	0	pseudogene	MOC22	17	0	0	19	15	44.12	28	0	0	23	0	0
2	101484680	101484680	A	T	SNP	Rag1	NM_009019.2	mouse	genbank	58_37k	-1	validated	missense	c.273	p.H91Q	0	NULL	HMMSmart_RING,HMMSmart_ZnF_C2H2,PatternScan_ZF_RING_1,HMMPfam_zf-C3HC4,HMMPfam_zf-RAG1,superfamily_SSF57850	0	no_errors	MOC22	74	0	0	53	42	44.21	78	0	0	85	0	0
2	101484853	101484853	T	A	SNP	Rag1	NM_009019.2	mouse	genbank	58_37k	-1	validated	missense	c.100	p.R34W	0	NULL	HMMSmart_RING,HMMSmart_ZnF_C2H2,PatternScan_ZF_RING_1,HMMPfam_zf-C3HC4,HMMPfam_zf-RAG1,superfamily_SSF57850	0	no_errors	MOC23	68	0	0	66	0	0	20	35	63.64	65	0	0
2	102479423	102479423	G	C	SNP	Pamr1	NM_173749.4	mouse	genbank	58_37k	1	validated	missense	c.1156	p.D386H	0	NULL	HMMPfam_Sushi,HMMSmart_CCP,HMMPfam_CUB,HMMSmart_CUB,superfamily_CUB,HMMPfam_Trypsin,HMMSmart_Tryp_SPc,HMMPfam_EGF,HMMSmart_EGF,superfamily_Pept_Ser_Cys,PatternScan_EGF_1,PatternScan_EGF_2,superfamily_Complement_control_module,superfamily_SSF57196	0	no_errors	MOC1	50	24	32.43	72	0	0	74	0	0	79	0	0
2	102482256	102482256	T	A	SNP	Pamr1	NM_173749.4	mouse	genbank	58_37k	1	validated	missense	c.1742	p.L581Q	0	HMMPfam_Trypsin,HMMSmart_Tryp_SPc,superfamily_Pept_Ser_Cys	HMMPfam_Sushi,HMMSmart_CCP,HMMPfam_CUB,HMMSmart_CUB,superfamily_CUB,HMMPfam_Trypsin,HMMSmart_Tryp_SPc,HMMPfam_EGF,HMMSmart_EGF,superfamily_Pept_Ser_Cys,PatternScan_EGF_1,PatternScan_EGF_2,superfamily_Complement_control_module,superfamily_SSF57196	0	no_errors	MOC23	206	0	0	224	0	0	104	79	43.17	256	0	0
2	102654376	102654376	T	A	SNP	Cd44	NM_009851.2	mouse	genbank	58_37k	-1	validated	nonsense	c.2257	p.K753*	0	NULL	HMMPfam_Xlink,HMMSmart_LINK,PatternScan_LINK_1,superfamily_C-type_lectin_fold	0	no_errors	MOC23	286	0	0	249	0	0	145	91	38.56	270	0	0
2	103297044	103297044	T	A	SNP	Cat	NM_009804.2	mouse	genbank	58_37k	-1	validated	missense	c.1397	p.H466L	0	HMMPfam_Catalase-rel,superfamily_Catalase_N	PatternScan_CATALASE_1,PatternScan_CATALASE_2,HMMPfam_Catalase-rel,superfamily_Catalase_N,HMMPfam_Catalase	0	no_errors	MOC1	41	70	62.5	113	0	0	72	0	0	110	0	0
2	103551634	103551634	G	A	SNP	Abtb2	NM_178890.3	mouse	genbank	58_37k	1	provisional	missense	c.2533	p.D845N	0	HMMSmart_SM00225,superfamily_POZ domain,HMMPfam_BTB	HMMSmart_SM00225,HMMPfam_Ank,HMMSmart_SM00248,superfamily_Ankyrin repeat,superfamily_Histone-fold,superfamily_POZ domain,HMMPfam_BTB,PatternScan_EF_HAND_1	0	no_errors	MOC22	264	0	0	133	142	51.64	239	2	0.83	316	1	0.32
2	103611921	103611921	G	T	SNP	Caprin1	NM_016739.3	mouse	genbank	58_37k	-1	validated	missense	c.1632	p.N544K	0	NULL	NULL	0	no_errors	MOC22	89	0	0	54	56	50.91	70	1	1.41	84	0	0
2	103908371	103908371	T	A	SNP	ENSMUSG00000075006	ENSMUST00000099666	mouse	ensembl	58_37k	-1	known	missense	c.145	p.S49C	0	NULL	NULL	0	no_stop_codon	MOC1	26	47	64.38	80	1	1.23	79	0	0	87	0	0
2	104096736	104096736	G	T	SNP	D430041D05Rik	ENSMUST00000040216	mouse	ensembl	58_37k	-1	known	missense	c.821	p.T274K	0	NULL	NULL	0	no_errors	MOC22	61	0	0	35	32	47.76	68	0	0	65	0	0
2	104096958	104096958	T	A	SNP	D430041D05Rik	ENSMUST00000040216	mouse	ensembl	58_37k	-1	known	missense	c.599	p.Q200L	0	NULL	NULL	0	no_errors	MOC23	99	0	0	130	0	0	45	41	47.67	148	1	0.67
2	104274526	104274526	T	A	SNP	Hipk3	NM_010434.2	mouse	genbank	58_37k	-1	validated	missense	c.2275	p.T759S	0	NULL	HMMSmart_S_TKc,PatternScan_PROTEIN_KINASE_ST,superfamily_Kinase_like,PatternScan_PROTEIN_KINASE_ATP,HMMPfam_Pkinase	0	no_errors	MOC22	92	0	0	66	54	45	77	0	0	106	1	0.93
2	104274794	104274794	T	C	SNP	Hipk3	NM_010434.2	mouse	genbank	58_37k	-1	validated	silent	c.2097	p.T699	0	NULL	HMMSmart_S_TKc,PatternScan_PROTEIN_KINASE_ST,superfamily_Kinase_like,PatternScan_PROTEIN_KINASE_ATP,HMMPfam_Pkinase	0	no_errors	MOC23	73	0	0	74	0	0	35	28	44.44	75	0	0
2	104311311	104311311	T	A	SNP	Hipk3	NM_010434.2	mouse	genbank	58_37k	-1	validated	missense	c.692	p.H231L	0	HMMSmart_S_TKc,superfamily_Kinase_like,HMMPfam_Pkinase	HMMSmart_S_TKc,PatternScan_PROTEIN_KINASE_ST,superfamily_Kinase_like,PatternScan_PROTEIN_KINASE_ATP,HMMPfam_Pkinase	0	no_errors	MOC1	40	69	63.3	143	1	0.68	95	0	0	122	0	0
2	104530660	104530660	T	A	SNP	Tcp11l1	NM_177190.5	mouse	genbank	58_37k	-1	provisional	missense	c.766	p.R256W	0	HMMPfam_Tcp11	HMMPfam_Tcp11	0	no_errors	MOC1	25	34	57.63	50	0	0	53	0	0	60	0	0
2	104554544	104554544	T	A	SNP	Pin1l	NM_001033768.2	mouse	genbank	58_37k	-1	provisional	silent	c.399	p.A133	0	HMMPfam_Rotamase,superfamily_SSF54534	HMMPfam_Rotamase,PatternScan_PPIC_PPIASE_1,HMMPfam_WW,HMMSmart_WW,PatternScan_WW_DOMAIN_1,superfamily_WW_Rsp5_WWP,superfamily_SSF54534	0	no_errors	MOC1	71	99	58.24	183	0	0	145	0	0	174	0	0
2	104685162	104685162	C	A	SNP	Prrg4	NM_178695.5	mouse	genbank	58_37k	-1	validated	silent	c.252	p.G84	0	HMMPfam_Gla,HMMSmart_SM00069,PatternScan_GLA_1,superfamily_GLA-domain	HMMPfam_Gla,HMMSmart_SM00069,PatternScan_GLA_1,superfamily_GLA-domain	0	no_errors	MOC23	279	0	0	272	0	0	85	101	54.3	265	1	0.38
2	105377357	105377357	T	A	SNP	Pax6os1	NR_002867.2	mouse	genbank	58_37k	-1	provisional	rna	NULL	NULL	0	0	0	0	no_errors	MOC23	26	0	0	19	0	0	6	5	45.45	24	0	0
2	106224336	106224336	G	C	SNP	Dcdc5	ENSMUST00000099638	mouse	ensembl	58_37k	1	known	missense	c.2143	p.G715R	0	NULL	HMMPfam_Ricin_B_lectin,HMMPfam_DCX,HMMSmart_SM00537,superfamily_Ricin B-like lectins,superfamily_Doublecortin (DC)	0	no_errors	MOC23	50	0	0	59	0	0	29	16	35.56	64	0	0
2	106241208	106241208	C	G	SNP	Dcdc5	ENSMUST00000099638	mouse	ensembl	58_37k	1	known	missense	c.2401	p.R801G	0	HMMPfam_DCX,HMMSmart_SM00537,superfamily_Doublecortin (DC)	HMMPfam_Ricin_B_lectin,HMMPfam_DCX,HMMSmart_SM00537,superfamily_Ricin B-like lectins,superfamily_Doublecortin (DC)	0	no_errors	MOC22	66	0	0	36	34	48.57	40	1	2.44	62	0	0
2	106244196	106244196	A	T	SNP	Dcdc5	XM_001481324.1	mouse	genbank	58_37k	1	model	missense	c.3778	p.T1260S	0	NULL	NULL	0	pseudogene:no_stop_codon:bad_bp_length_for_coding_region	MOC22	107	0	0	44	54	55.1	54	0	0	99	0	0
2	106584996	106584996	C	A	SNP	Mpped2	ENSMUST00000016530	mouse	ensembl	58_37k	1	known	missense	c.268	p.L90M	0	HMMPfam_Metallophos,superfamily_Metallo-dependent phosphatases	HMMPfam_Metallophos,superfamily_Metallo-dependent phosphatases	0	no_errors	MOC1	115	147	55.89	349	0	0	264	0	0	419	0	0
2	106704895	106704895	A	T	SNP	Mpped2	ENSMUST00000016530	mouse	ensembl	58_37k	1	known	nonsense	c.736	p.K246*	0	HMMPfam_Metallophos,superfamily_Metallo-dependent phosphatases	HMMPfam_Metallophos,superfamily_Metallo-dependent phosphatases	0	no_errors	MOC22	88	0	0	38	39	50.65	70	1	1.41	122	0	0
2	106766935	106766935	T	G	SNP	LOC677260	XR_034184.1	mouse	genbank	58_37k	-1	model	rna	NULL	NULL	0	0	0	0	pseudogene	MOC22	60	0	0	28	31	52.54	40	1	2.44	70	1	1.41
2	106897582	106897582	G	T	SNP	Fshb	NM_008045.2	mouse	genbank	58_37k	-1	provisional	missense	c.248	p.P83H	0	HMMSmart_SM00068,HMMPfam_Cys_knot,superfamily_Cystine-knot cytokines	HMMSmart_SM00068,HMMPfam_Cys_knot,PatternScan_GLYCO_HORMONE_BETA_1,PatternScan_GLYCO_HORMONE_BETA_2,superfamily_Cystine-knot cytokines	0	no_errors	MOC23	63	0	0	54	0	0	23	30	56.6	59	2	3.23
2	108715310	108715310	G	T	SNP	LOC100043423	XM_001479943.1	mouse	genbank	58_37k	-1	model	silent	c.106	p.R36	0	HMMPfam_Ribosomal_L35Ae	HMMPfam_Ribosomal_L35Ae,PatternScan_RIBOSOMAL_L35AE	0	pseudogene	MOC23	45	0	0	48	0	0	14	21	60	47	0	0
2	108933243	108933243	T	A	SNP	Mett5d1	NM_029790.3	mouse	genbank	58_37k	-1	provisional	missense	c.990	p.K330N	0	HMMPfam_Methyltransf_5,superfamily_SSF53335	HMMPfam_Methyltransf_5,superfamily_SSF53335,superfamily_SSF81799	0	no_errors	MOC22	186	0	0	1	164	99.39	137	1	0.72	160	0	0
2	109563867	109563867	C	G	SNP	Bdnf	NM_007540.4	mouse	genbank	58_37k	1	validated	missense	c.332	p.P111R	0	NULL	HMMPfam_NGF,HMMSmart_NGF,PatternScan_NGF_1,superfamily_SSF57501	0	no_errors	MOC1	51	25	32.89	92	0	0	88	0	0	84	0	0
2	110145670	110145670	A	T	SNP	Bbox1	NM_130452.1	mouse	genbank	58_37k	-1	validated	nonsense	c.120	p.C40*	0	NULL	HMMPfam_TauD,superfamily_Clavaminate synthase-like	0	no_errors	MOC22	275	0	0	119	129	51.81	251	1	0.4	322	0	0
2	110571940	110571940	T	A	SNP	Muc15	NM_172979.2	mouse	genbank	58_37k	1	provisional	missense	c.563	p.L188H	0	NULL	NULL	0	no_errors	MOC23	114	0	0	124	0	0	59	44	41.9	158	1	0.63
2	111004648	111004648	G	T	SNP	4930430A15Rik	ENSMUST00000111010	mouse	ensembl	58_37k	-1	known	missense	c.676	p.P226T	0	NULL	NULL	0	no_stop_codon	MOC23	114	0	0	142	0	0	56	48	46.15	140	0	0
2	111023195	111023195	T	A	SNP	LOC623301	XR_034254.1	mouse	genbank	58_37k	1	model	rna	NULL	NULL	0	0	0	0	pseudogene	MOC23	119	0	0	129	0	0	51	37	42.05	111	0	0
2	111026518	111026518	G	C	SNP	LOC623301	XR_034254.1	mouse	genbank	58_37k	1	model	rna	NULL	NULL	0	0	0	0	pseudogene	MOC23	25	0	0	51	0	0	17	10	37.04	26	0	0
2	111027119	111027119	T	A	SNP	LOC623301	XR_034254.1	mouse	genbank	58_37k	1	model	rna	NULL	NULL	0	0	0	0	pseudogene	MOC23	77	0	0	76	0	0	39	32	45.07	94	0	0
2	111068515	111068515	A	T	SNP	4930430A15Rik	NM_026248.3	mouse	genbank	58_37k	-1	validated	missense	c.248	p.L83Q	0	HMMPfam_Ank,HMMSmart_ANK,superfamily_ANK	HMMPfam_Ank,HMMSmart_ANK,superfamily_ANK	0	no_errors	MOC1	35	12	25.53	59	0	0	52	0	0	70	0	0
2	111098039	111098039	T	A	SNP	Olfr1276	NM_146395.1	mouse	genbank	58_37k	1	provisional	missense	c.766	p.F256I	0	HMMPfam_7tm_1,superfamily_SSF81321	HMMPfam_7tm_1,PatternScan_G_PROTEIN_RECEP_F1_1,superfamily_SSF81321	0	no_errors	MOC23	342	0	0	414	0	0	143	186	56.36	517	0	0
2	111156363	111156363	T	A	SNP	Olfr1280	NM_146908.1	mouse	genbank	58_37k	1	provisional	silent	c.726	p.S242	0	HMMPfam_7tm_1,superfamily_SSF81321	HMMPfam_7tm_1,PatternScan_G_PROTEIN_RECEP_F1_1,superfamily_SSF81321	0	no_errors	MOC23	376	0	0	395	0	0	151	139	47.93	470	2	0.42
2	111156415	111156415	T	C	SNP	Olfr1280	NM_146908.1	mouse	genbank	58_37k	1	provisional	missense	c.778	p.W260R	0	HMMPfam_7tm_1,superfamily_SSF81321	HMMPfam_7tm_1,PatternScan_G_PROTEIN_RECEP_F1_1,superfamily_SSF81321	0	no_errors	MOC23	385	0	0	380	1	0.26	124	143	53.56	430	0	0
2	111175842	111175842	T	A	SNP	Olfr1282	NM_146907.2	mouse	genbank	58_37k	-1	validated	missense	c.392	p.H131L	0	HMMPfam_7tm_1,superfamily_SSF81321	HMMPfam_7tm_1,PatternScan_G_PROTEIN_RECEP_F1_1,superfamily_SSF81321	0	no_errors	MOC22	306	0	0	198	173	46.63	336	2	0.59	575	3	0.52
2	111209585	111209585	C	A	SNP	Olfr1283	NM_207236.1	mouse	genbank	58_37k	1	provisional	silent	c.795	p.T265	0	HMMPfam_7tm_1,superfamily_SSF81321	HMMPfam_7tm_1,PatternScan_G_PROTEIN_RECEP_F1_1,superfamily_SSF81321	0	no_errors	MOC22	453	0	0	248	279	52.94	423	3	0.7	674	1	0.15
2	111329557	111329557	G	C	SNP	Olfr1290	NM_146262.2	mouse	genbank	58_37k	-1	provisional	missense	c.736	p.P246A	0	HMMPfam_7tm_1,superfamily_SSF81321	HMMPfam_7tm_1,PatternScan_G_PROTEIN_RECEP_F1_1,superfamily_SSF81321	0	no_errors	MOC23	156	0	0	180	0	0	89	47	34.56	186	1	0.53
2	111329693	111329693	A	T	SNP	Olfr1290	NM_146262.2	mouse	genbank	58_37k	-1	provisional	silent	c.600	p.A200	0	HMMPfam_7tm_1,superfamily_SSF81321	HMMPfam_7tm_1,PatternScan_G_PROTEIN_RECEP_F1_1,superfamily_SSF81321	0	no_errors	MOC22	168	0	0	86	90	51.14	149	0	0	178	1	0.56
2	111485615	111485615	C	G	SNP	Olfr1298	NM_146886.1	mouse	genbank	58_37k	-1	provisional	missense	c.538	p.D180H	0	HMMPfam_7tm_1,superfamily_SSF81321	HMMPfam_7tm_1,PatternScan_G_PROTEIN_RECEP_F1_1,PatternScan_LECTIN_LEGUME_ALPHA,superfamily_SSF81321	0	no_errors	MOC23	186	0	0	229	1	0.43	80	98	55.06	213	0	0
2	111485667	111485667	C	A	SNP	Olfr1298	NM_146886.1	mouse	genbank	58_37k	-1	provisional	silent	c.486	p.V162	0	HMMPfam_7tm_1,superfamily_SSF81321	HMMPfam_7tm_1,PatternScan_G_PROTEIN_RECEP_F1_1,PatternScan_LECTIN_LEGUME_ALPHA,superfamily_SSF81321	0	no_errors	MOC1	135	100	42.55	285	0	0	230	0	0	329	0	0
2	111713496	111713496	T	A	SNP	Olfr1305	NM_146401.2	mouse	genbank	58_37k	-1	provisional	missense	c.515	p.N172I	0	HMMPfam_7tm_1,superfamily_SSF81321	HMMPfam_7tm_1,PatternScan_G_PROTEIN_RECEP_F1_1,PatternScan_LECTIN_LEGUME_ALPHA,superfamily_SSF81321	0	no_errors	MOC23	89	0	0	92	0	0	35	49	58.33	102	0	0
2	111713497	111713497	T	A	SNP	Olfr1305	NM_146401.2	mouse	genbank	58_37k	-1	provisional	missense	c.514	p.N172Y	0	HMMPfam_7tm_1,superfamily_SSF81321	HMMPfam_7tm_1,PatternScan_G_PROTEIN_RECEP_F1_1,PatternScan_LECTIN_LEGUME_ALPHA,superfamily_SSF81321	0	no_errors	MOC23	91	0	0	92	0	0	37	48	56.47	103	0	0
2	111785443	111785443	A	T	SNP	Olfr1307	NM_001011787.1	mouse	genbank	58_37k	-1	provisional	missense	c.169	p.S57T	0	HMMPfam_7tm_1,superfamily_SSF81321	HMMPfam_7tm_1,PatternScan_G_PROTEIN_RECEP_F1_1,superfamily_SSF81321	0	no_errors	MOC23	197	0	0	245	1	0.4	82	127	60.77	287	0	0
2	111882409	111882409	G	A	SNP	Olfr1312	NM_146362.1	mouse	genbank	58_37k	-1	provisional	missense	c.779	p.S260F	0	HMMPfam_7tm_1,superfamily_SSF81321	HMMPfam_7tm_1,PatternScan_G_PROTEIN_RECEP_F1_1,superfamily_SSF81321	0	no_errors	MOC23	185	1	0.54	190	1	0.52	55	66	54.55	182	1	0.55
2	111912138	111912138	T	A	SNP	Olfr1313	NM_207150.1	mouse	genbank	58_37k	-1	provisional	missense	c.601	p.S201C	0	HMMPfam_7tm_1,superfamily_SSF81321	HMMPfam_7tm_1,PatternScan_G_PROTEIN_RECEP_F1_1,superfamily_SSF81321	0	no_errors	MOC23	146	0	0	162	1	0.61	60	74	55.22	168	0	0
2	111996484	111996484	T	A	SNP	Olfr1318	NM_001011802.2	mouse	genbank	58_37k	1	validated	silent	c.375	p.A125	0	HMMPfam_7tm_1,PatternScan_G_PROTEIN_RECEP_F1_1,superfamily_SSF81321	HMMPfam_7tm_1,PatternScan_G_PROTEIN_RECEP_F1_1,superfamily_SSF81321	0	no_errors	MOC23	219	0	0	229	0	0	107	85	44.27	246	2	0.81
2	112095817	112095817	A	T	SNP	Nut	NM_172521.1	mouse	genbank	58_37k	-1	provisional	missense	c.725	p.I242N	0	NULL	NULL	0	no_errors	MOC23	47	0	0	50	0	0	10	28	73.68	51	0	0
2	112320641	112320641	A	G	SNP	Chrm5	NM_205783.2	mouse	genbank	58_37k	-1	validated	missense	c.286	p.W96R	0	HMMPfam_7tm_1,superfamily_SSF81321	HMMPfam_7tm_1,PatternScan_G_PROTEIN_RECEP_F1_1,superfamily_SSF81321	0	no_errors	MOC23	161	0	0	149	1	0.67	65	57	46.72	132	0	0
2	112512474	112512474	T	A	SNP	Ryr3	NM_177652.2	mouse	genbank	58_37k	-1	provisional	missense	c.10571	p.N3524I	0	NULL	HMMPfam_RYDR_ITPR,HMMPfam_RyR,HMMPfam_MIR,superfamily_MIR domain (Pfam 02815),HMMPfam_SPRY,HMMPfam_Ion_trans,HMMPfam_RR_TM4-6,HMMPfam_RIH_assoc,HMMPfam_Ins145_P3_rec,HMMSmart_SM00472,HMMPfam_efhand,HMMSmart_SM00449,superfamily_EF-hand	0	no_errors	MOC23	179	0	0	199	1	0.5	73	98	56.65	206	2	0.96
2	112518641	112518641	T	C	SNP	Ryr3	NM_177652.2	mouse	genbank	58_37k	-1	provisional	missense	c.10144	p.T3382A	0	NULL	HMMPfam_RYDR_ITPR,HMMPfam_RyR,HMMPfam_MIR,superfamily_MIR domain (Pfam 02815),HMMPfam_SPRY,HMMPfam_Ion_trans,HMMPfam_RR_TM4-6,HMMPfam_RIH_assoc,HMMPfam_Ins145_P3_rec,HMMSmart_SM00472,HMMPfam_efhand,HMMSmart_SM00449,superfamily_EF-hand	0	no_errors	MOC23	92	0	0	89	0	0	50	34	40.48	108	0	0
2	112549458	112549458	T	A	SNP	Ryr3	NM_177652.2	mouse	genbank	58_37k	-1	provisional	missense	c.9653	p.Q3218L	0	NULL	HMMPfam_RYDR_ITPR,HMMPfam_RyR,HMMPfam_MIR,superfamily_MIR domain (Pfam 02815),HMMPfam_SPRY,HMMPfam_Ion_trans,HMMPfam_RR_TM4-6,HMMPfam_RIH_assoc,HMMPfam_Ins145_P3_rec,HMMSmart_SM00472,HMMPfam_efhand,HMMSmart_SM00449,superfamily_EF-hand	0	no_errors	MOC23	73	0	0	77	0	0	29	21	42	87	0	0
2	112596449	112596449	G	T	SNP	Ryr3	NM_177652.2	mouse	genbank	58_37k	-1	provisional	missense	c.8212	p.P2738T	0	HMMPfam_RyR	HMMPfam_RYDR_ITPR,HMMPfam_RyR,HMMPfam_MIR,superfamily_MIR domain (Pfam 02815),HMMPfam_SPRY,HMMPfam_Ion_trans,HMMPfam_RR_TM4-6,HMMPfam_RIH_assoc,HMMPfam_Ins145_P3_rec,HMMSmart_SM00472,HMMPfam_efhand,HMMSmart_SM00449,superfamily_EF-hand	0	no_errors	MOC1	31	48	60.76	97	0	0	72	0	0	109	0	0
2	112597789	112597789	A	T	SNP	Ryr3	NM_177652.2	mouse	genbank	58_37k	-1	provisional	missense	c.8023	p.F2675I	0	HMMPfam_RyR	HMMPfam_RYDR_ITPR,HMMPfam_RyR,HMMPfam_MIR,superfamily_MIR domain (Pfam 02815),HMMPfam_SPRY,HMMPfam_Ion_trans,HMMPfam_RR_TM4-6,HMMPfam_RIH_assoc,HMMPfam_Ins145_P3_rec,HMMSmart_SM00472,HMMPfam_efhand,HMMSmart_SM00449,superfamily_EF-hand	0	no_errors	MOC23	119	0	0	129	0	0	43	36	45.57	116	0	0
2	112603701	112603701	G	A	SNP	Ryr3	NM_177652.2	mouse	genbank	58_37k	-1	provisional	silent	c.7854	p.P2618	0	HMMPfam_RyR	HMMPfam_RYDR_ITPR,HMMPfam_RyR,HMMPfam_MIR,superfamily_MIR domain (Pfam 02815),HMMPfam_SPRY,HMMPfam_Ion_trans,HMMPfam_RR_TM4-6,HMMPfam_RIH_assoc,HMMPfam_Ins145_P3_rec,HMMSmart_SM00472,HMMPfam_efhand,HMMSmart_SM00449,superfamily_EF-hand	0	no_errors	MOC23	31	0	0	24	0	0	8	7	46.67	25	0	0
2	112689773	112689773	G	A	SNP	Ryr3	NM_177652.2	mouse	genbank	58_37k	-1	provisional	silent	c.3687	p.T1229	0	NULL	HMMPfam_RYDR_ITPR,HMMPfam_RyR,HMMPfam_MIR,superfamily_MIR domain (Pfam 02815),HMMPfam_SPRY,HMMPfam_Ion_trans,HMMPfam_RR_TM4-6,HMMPfam_RIH_assoc,HMMPfam_Ins145_P3_rec,HMMSmart_SM00472,HMMPfam_efhand,HMMSmart_SM00449,superfamily_EF-hand	0	no_errors	MOC23	40	0	0	44	0	0	20	15	42.86	53	0	0
2	112741009	112741009	A	T	SNP	Ryr3	NM_177652.2	mouse	genbank	58_37k	-1	provisional	silent	c.2172	p.G724	0	HMMPfam_SPRY,HMMSmart_SM00449	HMMPfam_RYDR_ITPR,HMMPfam_RyR,HMMPfam_MIR,superfamily_MIR domain (Pfam 02815),HMMPfam_SPRY,HMMPfam_Ion_trans,HMMPfam_RR_TM4-6,HMMPfam_RIH_assoc,HMMPfam_Ins145_P3_rec,HMMSmart_SM00472,HMMPfam_efhand,HMMSmart_SM00449,superfamily_EF-hand	0	no_errors	MOC22	177	1	0.55	85	74	46.25	121	0	0	187	1	0.53
2	112804559	112804559	A	T	SNP	Ryr3	NM_177652.2	mouse	genbank	58_37k	-1	provisional	missense	c.424	p.C142S	0	HMMPfam_Ins145_P3_rec,HMMSmart_SM00472	HMMPfam_RYDR_ITPR,HMMPfam_RyR,HMMPfam_MIR,superfamily_MIR domain (Pfam 02815),HMMPfam_SPRY,HMMPfam_Ion_trans,HMMPfam_RR_TM4-6,HMMPfam_RIH_assoc,HMMPfam_Ins145_P3_rec,HMMSmart_SM00472,HMMPfam_efhand,HMMSmart_SM00449,superfamily_EF-hand	0	no_errors	MOC1	27	31	53.45	58	0	0	56	0	0	69	0	0
2	113944454	113944454	C	A	SNP	Aqr	NM_009702.2	mouse	genbank	58_37k	-1	validated	missense	c.2998	p.G1000W	0	superfamily_P-loop containing nucleoside triphosphate hydrolases	superfamily_P-loop containing nucleoside triphosphate hydrolases	0	no_errors	MOC22	55	0	0	30	27	47.37	36	0	0	41	0	0
2	116353966	116353966	A	C	SNP	LOC433464	XM_485050.5	mouse	genbank	58_37k	-1	model	silent	c.216	p.P72	0	HMMSmart_SM00176,HMMSmart_SM00173,HMMSmart_SM00174,HMMSmart_SM00175,HMMPfam_Ras,superfamily_P-loop containing nucleoside triphosphate hydrolases	HMMSmart_SM00176,HMMSmart_SM00173,HMMSmart_SM00174,HMMSmart_SM00175,HMMPfam_Ras,superfamily_P-loop containing nucleoside triphosphate hydrolases	0	no_errors	MOC23	89	0	0	99	0	0	47	31	39.74	93	0	0
2	116354012	116354012	T	A	SNP	LOC433464	XM_485050.5	mouse	genbank	58_37k	-1	model	missense	c.170	p.E57V	0	HMMSmart_SM00176,HMMSmart_SM00173,HMMSmart_SM00174,HMMSmart_SM00175,HMMPfam_Ras,superfamily_P-loop containing nucleoside triphosphate hydrolases	HMMSmart_SM00176,HMMSmart_SM00173,HMMSmart_SM00174,HMMSmart_SM00175,HMMPfam_Ras,superfamily_P-loop containing nucleoside triphosphate hydrolases	0	no_errors	MOC22	121	0	0	72	71	49.65	106	1	0.93	127	0	0
2	116708228	116708228	A	T	SNP	Tmco5	NM_026104.4	mouse	genbank	58_37k	1	validated	missense	c.337	p.S113C	0	NULL	NULL	0	no_errors	MOC22	81	0	0	36	38	51.35	42	0	0	68	0	0
2	117944541	117944541	A	T	SNP	Thbs1	NM_011580.3	mouse	genbank	58_37k	1	provisional	missense	c.1631	p.K544M	0	HMMPfam_TSP_1,HMMSmart_TSP1,superfamily_TSP1	HMMPfam_TSP_1,HMMSmart_TSP1,superfamily_TSP1,HMMPfam_VWC,HMMSmart_VWC,PatternScan_VWFC_1,HMMSmart_TSPN,HMMPfam_TSP_3,HMMPfam_EGF,HMMSmart_EGF,HMMPfam_TSP_C,superfamily_ConA_like_lec_gl,PatternScan_EGF_2,superfamily_SSF103647,superfamily_SSF57196	0	no_errors	MOC22	37	0	0	13	27	67.5	26	0	0	37	0	0
2	117945672	117945672	T	C	SNP	Thbs1	NM_011580.3	mouse	genbank	58_37k	1	provisional	silent	c.2049	p.Y683	0	HMMPfam_EGF,HMMSmart_EGF,PatternScan_EGF_2	HMMPfam_TSP_1,HMMSmart_TSP1,superfamily_TSP1,HMMPfam_VWC,HMMSmart_VWC,PatternScan_VWFC_1,HMMSmart_TSPN,HMMPfam_TSP_3,HMMPfam_EGF,HMMSmart_EGF,HMMPfam_TSP_C,superfamily_ConA_like_lec_gl,PatternScan_EGF_2,superfamily_SSF103647,superfamily_SSF57196	0	no_errors	MOC1	94	14	12.96	107	0	0	87	0	0	110	0	0
2	118256913	118256913	G	T	SNP	Eif2ak4	NM_013719.3	mouse	genbank	58_37k	1	validated	nonsense	c.2197	p.E733*	0	superfamily_Kinase_like,HMMPfam_Pkinase	HMMPfam_tRNA-synt_2b,HMMPfam_RWD,HMMSmart_RWD,PatternScan_PROTEIN_KINASE_ST,superfamily_Kinase_like,superfamily_UBQ-conjugat/RWD-like,PatternScan_PROTEIN_KINASE_ATP,HMMPfam_Pkinase,superfamily_SSF55681	0	no_errors	MOC23	74	0	0	60	0	0	32	29	47.54	78	0	0
2	118370848	118370848	T	A	SNP	Bmf	NM_138313.3	mouse	genbank	58_37k	-1	validated	silent	c.684	p.A228	0	NULL	NULL	0	no_errors	MOC22	115	0	0	53	56	50.91	94	1	1.05	119	2	1.65
2	118534911	118534911	C	G	SNP	Plcb2	NM_177568.2	mouse	genbank	58_37k	-1	validated	missense	c.3370	p.E1124Q	0	HMMPfam_PLC-beta_C	HMMPfam_C2,HMMSmart_SM00239,HMMPfam_PI-PLC-X,HMMSmart_SM00148,HMMPfam_PI-PLC-Y,HMMSmart_SM00149,superfamily_C2 domain (Calcium/lipid-binding domain CaLB),HMMPfam_PLC-beta_C,HMMPfam_efhand_like,superfamily_PLC-like phosphodiesterases,superfamily_EF-hand	0	no_errors	MOC1	43	61	58.65	87	0	0	82	0	0	97	0	0
2	118544281	118544281	A	G	SNP	Plcb2	NM_177568.2	mouse	genbank	58_37k	-1	validated	silent	c.1203	p.Y401	0	HMMPfam_PI-PLC-X,HMMSmart_SM00148,superfamily_PLC-like phosphodiesterases	HMMPfam_C2,HMMSmart_SM00239,HMMPfam_PI-PLC-X,HMMSmart_SM00148,HMMPfam_PI-PLC-Y,HMMSmart_SM00149,superfamily_C2 domain (Calcium/lipid-binding domain CaLB),HMMPfam_PLC-beta_C,HMMPfam_efhand_like,superfamily_PLC-like phosphodiesterases,superfamily_EF-hand	0	no_errors	MOC23	206	0	0	221	0	0	88	110	55.56	229	1	0.43
2	118611843	118611843	T	A	SNP	Disp2	NM_170593.2	mouse	genbank	58_37k	1	provisional	missense	c.46	p.C16S	0	NULL	superfamily_Multidrug efflux transporter AcrB transmembrane domain	0	no_errors	MOC1	120	222	64.91	291	0	0	232	0	0	358	0	0
2	118616254	118616254	T	A	SNP	Disp2	NM_170593.2	mouse	genbank	58_37k	1	provisional	missense	c.1730	p.M577K	0	superfamily_Multidrug efflux transporter AcrB transmembrane domain	superfamily_Multidrug efflux transporter AcrB transmembrane domain	0	no_errors	MOC22	141	0	0	69	62	47.33	124	0	0	144	0	0
2	118746540	118746540	A	T	SNP	Bahd1	NM_001045523.1	mouse	genbank	58_37k	1	validated	missense	c.2000	p.Q667L	0	HMMPfam_BAH,HMMSmart_SM00439	HMMPfam_BAH,HMMSmart_SM00439	0	no_errors	MOC22	157	0	0	64	49	42.98	93	0	0	141	0	0
2	118847888	118847888	T	C	SNP	Ccdc32	NM_199310.2	mouse	genbank	58_37k	-1	validated	silent	c.21	p.Q7	0	NULL	NULL	0	no_errors	MOC23	149	0	0	112	0	0	32	49	59.76	115	0	0
2	118897573	118897573	A	C	SNP	Casc5	NM_029617.2	mouse	genbank	58_37k	1	provisional	missense	c.4018	p.N1340H	0	NULL	NULL	0	no_errors	MOC22	132	0	0	60	56	48.28	87	0	0	100	1	0.99
2	118920887	118920887	A	C	SNP	Casc5	NM_029617.2	mouse	genbank	58_37k	1	provisional	missense	c.5660	p.Q1887P	0	NULL	NULL	0	no_errors	MOC23	98	0	0	91	0	0	40	16	28.57	73	0	0
2	119037742	119037742	G	T	SNP	Zfyve19	NM_028054.3	mouse	genbank	58_37k	1	validated	missense	c.593	p.R198I	0	NULL	HMMPfam_FYVE,HMMSmart_FYVE,HMMSmart_RING,superfamily_FYVE_PHD_ZnF	0	no_errors	MOC23	46	0	0	49	0	0	22	19	46.34	32	0	0
2	119042442	119042442	G	T	SNP	Zfyve19	NM_028054.3	mouse	genbank	58_37k	1	validated	nonstop	c.1169	p.*390L	0	NULL	HMMPfam_FYVE,HMMSmart_FYVE,HMMSmart_RING,superfamily_FYVE_PHD_ZnF	0	no_errors	MOC22	105	0	0	53	63	54.31	78	0	0	109	0	0
2	119159887	119159887	A	T	SNP	Dll4	NM_019454.3	mouse	genbank	58_37k	1	validated	missense	c.2050	p.T684S	0	NULL	PatternScan_ASX_HYDROXYL,HMMPfam_DSL,HMMSmart_DSL,HMMSmart_EGF_CA,HMMPfam_EGF,HMMSmart_EGF,HMMPfam_MNNL,PatternScan_EGF_1,PatternScan_EGF_2,HMMPfam_EGF_2,superfamily_SSF57196	0	no_errors	MOC23	108	0	0	105	0	0	27	33	55	89	0	0
2	119252773	119252773	T	G	SNP	Ino80	NM_026574.3	mouse	genbank	58_37k	-1	provisional	missense	c.2311	p.S771R	0	HMMPfam_SNF2_N	HMMPfam_SNF2_N,HMMPfam_Helicase_C,HMMSmart_SM00490,HMMSmart_SM00487,superfamily_P-loop containing nucleoside triphosphate hydrolases	0	no_errors	MOC1	9	23	69.7	36	0	0	30	0	0	39	0	0
2	119486397	119486397	T	A	SNP	Ndufaf1	NM_027175.3	mouse	genbank	58_37k	-1	provisional	splice_site	c.1-2	e1-2	0	0	0	0	no_errors	MOC23	19	0	0	30	0	0	12	8	40	19	0	0
2	119531245	119531245	A	T	SNP	Rtf1	ENSMUST00000028767	mouse	ensembl	58_37k	1	known	missense	c.543	p.E181D	0	NULL	HMMPfam_Plus-3,HMMSmart_Plus3	0	no_errors	MOC1	42	30	41.67	60	0	0	60	0	0	69	0	0
2	119558519	119558519	A	T	SNP	Rtf1	ENSMUST00000028767	mouse	ensembl	58_37k	1	known	splice_site	c.2042-2	e18-2	0	0	0	0	no_errors	MOC23	149	0	0	150	0	0	74	39	34.51	138	0	0
2	119593937	119593937	A	T	SNP	Rpap1	NM_177294.5	mouse	genbank	58_37k	-1	validated	missense	c.3134	p.L1045Q	0	NULL	HMMPfam_RPAP1_C,HMMPfam_RPAP1_N	0	no_errors	MOC22	130	0	0	75	61	44.85	119	1	0.83	143	1	0.69
2	119634479	119634479	A	T	SNP	Tyro3	NM_019392.2	mouse	genbank	58_37k	1	provisional	missense	c.942	p.R314S	0	HMMPfam_fn3,HMMSmart_FN3,superfamily_FN_III-like	HMMPfam_Pkinase_Tyr,HMMSmart_TyrKc,HMMSmart_IGc2,HMMSmart_IG,HMMPfam_fn3,HMMSmart_FN3,PatternScan_PROTEIN_KINASE_TYR,superfamily_FN_III-like,superfamily_Kinase_like,HMMPfam_ig,PatternScan_PROTEIN_KINASE_ATP,superfamily_SSF48726	0	no_errors	MOC1	40	24	37.5	94	0	0	62	0	0	78	0	0
2	119704194	119704194	T	C	SNP	LOC625403	XR_034672.1	mouse	genbank	58_37k	-1	model	rna	NULL	NULL	0	0	0	0	pseudogene	MOC22	42	1	2.33	23	29	54.72	28	0	0	40	0	0
2	119757656	119757656	A	T	SNP	Mga	NM_013720.2	mouse	genbank	58_37k	1	validated	nonsense	c.3628	p.K1210*	0	NULL	HMMPfam_HLH,HMMSmart_SM00353,HMMPfam_T-box,HMMSmart_SM00425,superfamily_p53-like transcription factors,superfamily_HLH helix-loop-helix DNA-binding domain,PatternScan_TBOX_2	0	no_errors	MOC1	29	61	67.78	99	0	0	87	0	0	95	0	0
2	119836515	119836515	A	T	SNP	Mapkbp1	NM_011941.3	mouse	genbank	58_37k	1	validated	missense	c.246	p.K82N	0	HMMSmart_SM00320,superfamily_WD40 repeat-like,HMMPfam_WD40	HMMSmart_SM00320,PatternScan_PTS_HPR_SER,superfamily_WD40 repeat-like,HMMPfam_WD40	0	no_errors	MOC22	332	0	0	120	143	54.37	227	1	0.44	320	0	0
2	119848789	119848789	A	T	SNP	Mapkbp1	NM_011941.3	mouse	genbank	58_37k	1	validated	silent	c.3339	p.S1113	0	NULL	HMMSmart_SM00320,PatternScan_PTS_HPR_SER,superfamily_WD40 repeat-like,HMMPfam_WD40	0	no_errors	MOC22	245	0	0	127	116	47.54	218	0	0	243	0	0
2	119850275	119850275	A	T	SNP	Mapkbp1	NM_011941.3	mouse	genbank	58_37k	1	validated	missense	c.4220	p.Q1407L	0	NULL	HMMSmart_SM00320,PatternScan_PTS_HPR_SER,superfamily_WD40 repeat-like,HMMPfam_WD40	0	no_errors	MOC22	127	0	0	69	59	46.09	116	0	0	111	0	0
2	119851042	119851042	A	T	SNP	Mapkbp1	NM_011941.3	mouse	genbank	58_37k	1	validated	missense	c.4487	p.E1496V	0	NULL	HMMSmart_SM00320,PatternScan_PTS_HPR_SER,superfamily_WD40 repeat-like,HMMPfam_WD40	0	no_errors	MOC23	143	0	0	142	0	0	76	35	31.53	192	2	1.03
2	119874194	119874194	C	A	SNP	Spnb5	ENSMUST00000156159	mouse	ensembl	58_37k	-1	known	missense	c.2309	p.W770L	0	HMMPfam_Spectrin,HMMSmart_SM00150,superfamily_Spectrin repeat	HMMPfam_Spectrin,HMMSmart_SM00150,superfamily_Spectrin repeat	0	pseudogene:no_stop_codon:bad_bp_length_for_coding_region	MOC22	190	0	0	86	87	50.29	123	0	0	169	0	0
2	119874413	119874413	T	A	SNP	Spnb5	ENSMUST00000099515	mouse	ensembl	58_37k	-1	known	missense	c.2233	p.S745C	0	HMMPfam_Spectrin,HMMSmart_SPEC,superfamily_Spectrin	HMMPfam_Spectrin,HMMSmart_SPEC,superfamily_Spectrin	0	no_stop_codon	MOC1	79	140	63.64	216	0	0	182	0	0	256	0	0
2	119876228	119876228	C	G	SNP	Spnb5	ENSMUST00000156159	mouse	ensembl	58_37k	-1	known	missense	c.1556	p.W519S	0	HMMPfam_Spectrin,HMMSmart_SM00150,superfamily_Spectrin repeat	HMMPfam_Spectrin,HMMSmart_SM00150,superfamily_Spectrin repeat	0	pseudogene:no_stop_codon:bad_bp_length_for_coding_region	MOC23	206	0	0	235	1	0.42	114	72	38.71	235	0	0
2	119882203	119882203	C	T	SNP	Spnb5	ENSMUST00000099515	mouse	ensembl	58_37k	-1	known	silent	c.234	p.L78	0	HMMPfam_Spectrin,HMMSmart_SPEC	HMMPfam_Spectrin,HMMSmart_SPEC,superfamily_Spectrin	0	no_stop_codon	MOC23	189	0	0	188	0	0	102	60	37.04	212	1	0.47
2	119882204	119882204	A	T	SNP	Spnb5	ENSMUST00000099515	mouse	ensembl	58_37k	-1	known	missense	c.233	p.L78Q	0	HMMPfam_Spectrin,HMMSmart_SPEC	HMMPfam_Spectrin,HMMSmart_SPEC,superfamily_Spectrin	0	no_stop_codon	MOC23	185	0	0	187	0	0	100	58	36.71	214	0	0
2	119884818	119884818	T	C	SNP	Spnb5	ENSMUST00000125737	mouse	ensembl	58_37k	-1	known	missense	c.830	p.D277G	0	superfamily_Spectrin repeat	HMMPfam_Spectrin,HMMSmart_SM00150,superfamily_Spectrin repeat	0	pseudogene:no_stop_codon:bad_bp_length_for_coding_region	MOC22	271	0	0	128	114	46.91	197	1	0.51	292	0	0
[truncated: 9,566 more rows]

## Sheet: S2
Table S2-SNVs aggressive lines
[truncated: 1,316 more rows]

## Sheet: S3
Table S3-Distribution of nucleotide changes
[truncated: 36 more rows]

[truncated: 17 more sheets: S4, S5, S6, S7, S8, S9, S10, S11, S12, S13, S14, S15, S16, S17, S18, S19, S20]
